# Supplementary material
Source: publisher site journal article supplement (https://www.dovepress.com/get_supplementary_file.php?f=257512.xlsx)
Supplement: Supplementary file 1 [file get_supplementary_file.php]

## Sheet: Up Pathway2Protein
KEGG pathway	Fisher's exact test p value	Mapping	Fold enrichment	Protein accession	Position	Ratio	Regulated Type	P value	Amino acid	Protein description	Gene name	Localization probability	PEP	Score	Modified sequence	Charge	Mass error [ppm]	MS/MS Count	JCTRL_1	JCTRL_2	JCTRL_3	JSH_1	JSH_2	JSH_3
hsa04014 Ras signaling pathway	0.921809	3	0.56	P14921	26	1.554	Up	0.00063842	S	Protein C-ets-1 OS=Homo sapiens OX=9606 GN=ETS1 PE=1 SV=1	ETS1	0.999999	6.73664e-06	88.394	VDLELFPS(1)PDMECADVPLLTPSSK	3	-2.0065	3	0.819085	0.801205	0.74514	1.3102	1.20058	1.16435
hsa04014 Ras signaling pathway	0.921809	3	0.56	P0DP25	102	1.304	Up	0.00041989	S	Calmodulin-3 OS=Homo sapiens OX=9606 GN=CALM3 PE=1 SV=1	CALM3	1	0.000220671	86.987	VFDKDGNGYIS(1)AAELR	3	0.004572	1	0.860182	0.856137	0.893194	1.17683	1.09606	1.12946
hsa04014 Ras signaling pathway	0.921809	3	0.56	P43403	106	1.203	Up	0.036162	S	Tyrosine-protein kinase ZAP-70 OS=Homo sapiens OX=9606 GN=ZAP70 PE=1 SV=1	ZAP70	1	0.000234608	67.496	KPCNRPS(1)GLEPQPGVFDCLR	4	0.29141	1	0.872816	0.993097	0.896065	1.15692	1.15456	1.01118
hsa05224 Breast cancer	0.979329	1	0.28	Q9UBS0	416	2.556	Up	0.00142006	S	Ribosomal protein S6 kinase beta-2 OS=Homo sapiens OX=9606 GN=RPS6KB2 PE=1 SV=2	RPS6KB2	0.994398	0.00771359	64.841	RLNS(0.994)S(0.006)PR	3	-0.54426	1	0.665977	0.612967	0.456459	1.3966	1.58972	1.4494
hsa04923 Regulation of lipolysis in adipocytes	0.666991	1	0.98	Q96AD5	428	1.258	Up	0.00504	S	Patatin-like phospholipase domain-containing protein 2 OS=Homo sapiens OX=9606 GN=PNPLA2 PE=1 SV=1	PNPLA2	1	4.93846e-11	149.32	NNLS(1)LGDALAKWEECQR	3	-0.060794	7	0.919634	0.904245	0.857834	1.1972	1.11542	1.06052
hsa04622 RIG-I-like receptor signaling pathway	0.661502	2	0.92	Q16539	180	2.17	Up	0.00035653	T	Mitogen-activated protein kinase 14 OS=Homo sapiens OX=9606 GN=MAPK14 PE=1 SV=3	MAPK14	0.999883	0.000118317	84.508	HTDDEMT(1)GY(0.998)VAT(0.002)R	3	0.46926	1	0.71334	0.660397	0.573296	1.46596	1.41754	1.34139
hsa04622 RIG-I-like receptor signaling pathway	0.661502	2	0.92	Q16539	182	2.252	Up	3.8544e-05	Y	Mitogen-activated protein kinase 14 OS=Homo sapiens OX=9606 GN=MAPK14 PE=1 SV=3	MAPK14	0.998479	6.03326e-22	194.65	HTDDEMT(0.002)GY(0.998)VATR	2	0.15731	7	0.603595	0.666667	0.628385	1.48511	1.44154	1.34816
hsa04622 RIG-I-like receptor signaling pathway	0.661502	2	0.92	Q13546	320	1.508	Up	0.0105427	S	Receptor-interacting serine/threonine-protein kinase 1 OS=Homo sapiens OX=9606 GN=RIPK1 PE=1 SV=3	RIPK1	1	6.96758e-05	92.289	MQS(1)LQLDCVAVPSSR	2	-0.26441	2	0.750795	0.850431	0.845521	1.39956	1.22883	1.06155
hsa03008 Ribosome biogenesis in eukaryotes	0.816257	3	0.71	Q13428	583	1.256	Up	0.0067613	S	Treacle protein OS=Homo sapiens OX=9606 GN=TCOF1 PE=1 SV=3	TCOF1	0.954749	2.33842e-07	125.04	SLGNILQAKPT(0.001)S(0.044)S(0.955)PAK	3	0.17641	3	0.92459	0.880795	0.873589	1.04898	1.20496	1.10973
hsa03008 Ribosome biogenesis in eukaryotes	0.816257	3	0.71	O00567	591	1.335	Up	0.0080047	S	Nucleolar protein 56 OS=Homo sapiens OX=9606 GN=NOP56 PE=1 SV=4	NOP56	1	0.0112014	45.28	KFHKAS(1)QED	3	0.39915	1	0.967177	0.80912	0.817697	1.18098	1.15973	1.12347
hsa03008 Ribosome biogenesis in eukaryotes	0.816257	3	0.71	Q9NU22	4538	1.247	Up	0.0128639	S	Midasin OS=Homo sapiens OX=9606 GN=MDN1 PE=1 SV=2	MDN1	1	1.63016e-82	304.56	AEENTDQAS(1)PQEDYAGFER	2	0.52208	2	0.851158	0.928495	0.895288	1.21087	1.04638	1.07759
hsa04360 Axon guidance	0.807838	4	0.74	Q16555	522	1.359	Up	0.00110229	S	Dihydropyrimidinase-related protein 2 OS=Homo sapiens OX=9606 GN=DPYSL2 PE=1 SV=1	DPYSL2	0.751923	4.02934e-05	88.945	T(0.357)VT(0.644)PAS(0.5)S(0.5)AKT(0.248)S(0.752)PAK	3	1.8675	2	0.919483	0.832392	0.829151	1.13775	1.19351	1.17701
hsa04360 Axon guidance	0.807838	4	0.74	Q9NZN5	736	1.276	Up	0.0105604	T	Rho guanine nucleotide exchange factor 12 OS=Homo sapiens OX=9606 GN=ARHGEF12 PE=1 SV=1	ARHGEF12	0.992543	0.000558217	67.234	VT(0.007)EHGT(0.993)PKPFR	4	-0.24544	1	0.852473	0.908913	0.901341	1.02703	1.15762	1.21173
hsa04360 Axon guidance	0.807838	4	0.74	P23528	24	1.216	Up	0.047341	S	Cofilin-1 OS=Homo sapiens OX=9606 GN=CFL1 PE=1 SV=3	CFL1	0.789751	0.00949448	57.225	KS(0.172)S(0.79)T(0.039)PEEVK	2	-0.81102	1	0.850679	0.883504	1.00487	1.21468	1.07945	1.03696
hsa04360 Axon guidance	0.807838	4	0.74	P19105	18	1.605	Up	0.000183171	T	Myosin regulatory light chain 12A OS=Homo sapiens OX=9606 GN=MYL12A PE=1 SV=2	MYL12A	1	4.14264e-31	198.67	AT(1)S(1)NVFAMFDQSQIQEFK	3	-1.5076	12	0.768317	0.748357	0.82846	1.30126	1.23173	1.22992
hsa04360 Axon guidance	0.807838	4	0.74	P19105	19	1.359	Up	5.7321e-05	S	Myosin regulatory light chain 12A OS=Homo sapiens OX=9606 GN=MYL12A PE=1 SV=2	MYL12A	1	3.22787e-64	273.37	AT(1)S(1)NVFAMFDQSQIQEFK	3	-1.5076	20	0.858416	0.841315	0.871345	1.16632	1.19102	1.13655
hsa05014 Amyotrophic lateral sclerosis (ALS)	0.747303	1	0.78	Q16539	180	2.17	Up	0.00035653	T	Mitogen-activated protein kinase 14 OS=Homo sapiens OX=9606 GN=MAPK14 PE=1 SV=3	MAPK14	0.999883	0.000118317	84.508	HTDDEMT(1)GY(0.998)VAT(0.002)R	3	0.46926	1	0.71334	0.660397	0.573296	1.46596	1.41754	1.34139
hsa05014 Amyotrophic lateral sclerosis (ALS)	0.747303	1	0.78	Q16539	182	2.252	Up	3.8544e-05	Y	Mitogen-activated protein kinase 14 OS=Homo sapiens OX=9606 GN=MAPK14 PE=1 SV=3	MAPK14	0.998479	6.03326e-22	194.65	HTDDEMT(0.002)GY(0.998)VATR	2	0.15731	7	0.603595	0.666667	0.628385	1.48511	1.44154	1.34816
hsa04919 Thyroid hormone signaling pathway	0.99812	1	0.17	Q71F56	923	1.25	Up	0.0074976	S	Mediator of RNA polymerase II transcription subunit 13-like OS=Homo sapiens OX=9606 GN=MED13L PE=1 SV=1	MED13L	1	0.00519008	50.752	MEVEDGLGS(1)PKPEEIK	3	0.66175	2	0.948339	0.883871	0.870599	1.17005	1.04713	1.16254
hsa05166 Human T-cell leukemia virus 1 infection	0.551885	9	1	Q13535	1989	1.373	Up	0.0153005	T	Serine/threonine-protein kinase ATR OS=Homo sapiens OX=9606 GN=ATR PE=1 SV=3	ATR	1	4.00762e-07	123	GVELCFPENET(1)PPEGK	4	-0.42988	4	0.954796	0.745545	0.854271	1.24854	1.13439	1.12464
hsa05166 Human T-cell leukemia virus 1 infection	0.551885	9	1	Q9Y4A5	2077	2.756	Up	3.6757e-05	S	Transformation/transcription domain-associated protein OS=Homo sapiens OX=9606 GN=TRRAP PE=1 SV=3	TRRAP	0.938279	8.18096e-16	158.8	S(0.012)QS(0.938)LPGADS(0.05)LLAKPIDK	3	0.51108	3	0.58956	0.533811	0.505314	1.44499	1.49219	1.55106
hsa05166 Human T-cell leukemia virus 1 infection	0.551885	9	1	P06239	158	1.297	Up	0.0058213	S	Tyrosine-protein kinase Lck OS=Homo sapiens OX=9606 GN=LCK PE=1 SV=6	LCK	0.899898	0.000522489	77.795	ES(0.021)ES(0.9)T(0.078)AGS(0.001)FSLSVR	2	-0.78547	1	0.796709	0.889423	0.924453	1.15988	1.13996	1.08577
hsa05166 Human T-cell leukemia virus 1 infection	0.551885	9	1	P06239	394	1.225	Up	0.00126248	Y	Tyrosine-protein kinase Lck OS=Homo sapiens OX=9606 GN=LCK PE=1 SV=6	LCK	0.993133	5.27585e-10	153.34	LIEDNEY(0.993)T(0.007)AR	3	0.54142	3	0.893514	0.927885	0.865805	1.0854	1.13083	1.07669
hsa05166 Human T-cell leukemia virus 1 infection	0.551885	9	1	P06239	505	1.276	Up	0.037598	Y	Tyrosine-protein kinase Lck OS=Homo sapiens OX=9606 GN=LCK PE=1 SV=6	LCK	0.999913	6.68754e-17	174.62	SVLEDFFTATEGQY(1)QPQP	2	-0.57314	3	1.00194	0.791346	0.847913	1.19067	1.13996	1.03935
hsa05166 Human T-cell leukemia virus 1 infection	0.551885	9	1	P14921	26	1.554	Up	0.00063842	S	Protein C-ets-1 OS=Homo sapiens OX=9606 GN=ETS1 PE=1 SV=1	ETS1	0.999999	6.73664e-06	88.394	VDLELFPS(1)PDMECADVPLLTPSSK	3	-2.0065	3	0.819085	0.801205	0.74514	1.3102	1.20058	1.16435
hsa05166 Human T-cell leukemia virus 1 infection	0.551885	9	1	Q12834	59	1.359	Up	0.0001152	T	Cell division cycle protein 20 homolog OS=Homo sapiens OX=9606 GN=CDC20 PE=1 SV=2	CDC20	0.998818	0.0182197	47.894	T(0.001)PGRT(0.999)PGK	3	0.14876	2	0.844011	0.888458	0.845513	1.17898	1.18238	1.14159
hsa05166 Human T-cell leukemia virus 1 infection	0.551885	9	1	Q12834	106	1.423	Up	0.0118045	T	Cell division cycle protein 20 homolog OS=Homo sapiens OX=9606 GN=CDC20 PE=1 SV=2	CDC20	0.958264	3.66038e-08	124.5	ENQPENS(0.003)QT(0.958)PT(0.039)KK	4	0.31123	3	0.847725	0.85257	0.814986	1.07076	1.12746	1.38164
hsa05166 Human T-cell leukemia virus 1 infection	0.551885	9	1	Q12834	70	1.386	Up	0.007641	T	Cell division cycle protein 20 homolog OS=Homo sapiens OX=9606 GN=CDC20 PE=1 SV=2	CDC20	0.891078	2.53554e-11	153.2	VQT(0.105)T(0.891)PS(0.004)KPGGDR	2	0.20885	3	0.866295	0.916586	0.767808	1.14152	1.12021	1.27434
hsa05166 Human T-cell leukemia virus 1 infection	0.551885	9	1	Q12834	41	1.445	Up	0.0044796	S	Cell division cycle protein 20 homolog OS=Homo sapiens OX=9606 GN=CDC20 PE=1 SV=2	CDC20	1	0.000282221	82.663	EAAGPAPS(1)PMR	2	0.08506	1	0.910864	0.798254	0.790009	1.18106	1.12332	1.30642
hsa05166 Human T-cell leukemia virus 1 infection	0.551885	9	1	O14757	317	1.573	Up	0.0181016	S	Serine/threonine-protein kinase Chk1 OS=Homo sapiens OX=9606 GN=CHEK1 PE=1 SV=2	CHEK1	0.979974	8.86255e-06	127.83	YSS(0.02)S(0.98)QPEPR	2	-0.08267	1	0.664557	0.95122	0.749726	1.28276	1.10736	1.33012
hsa05166 Human T-cell leukemia virus 1 infection	0.551885	9	1	Q9H6Z4	100	1.386	Up	0.0061387	S	Ran-binding protein 3 OS=Homo sapiens OX=9606 GN=RANBP3 PE=1 SV=1	RANBP3	0.977334	0.00116459	60.219	S(0.031)AGGS(0.977)S(0.992)PEGGEDS(1)DREDGNYCPPVKR	4	-0.38409	1	0.83925	0.877712	0.84	1.0974	1.3245	1.12243
hsa05166 Human T-cell leukemia virus 1 infection	0.551885	9	1	Q13257	195	1.369	Up	0.004359	S	Mitotic spindle assembly checkpoint protein MAD2A OS=Homo sapiens OX=9606 GN=MAD2L1 PE=1 SV=1	MAD2L1	0.99912	0.00178722	81.709	VNS(0.999)MVAY(0.001)K	2	-1.5956	4	0.814151	0.871531	0.851961	1.19283	1.2333	1.04758
hsa05166 Human T-cell leukemia virus 1 infection	0.551885	9	1	P27797	195	1.462	Up	0.0035425	S	Calreticulin OS=Homo sapiens OX=9606 GN=CALR PE=1 SV=1	CALR	0.993692	1.82952e-08	129.72	IDNSQVES(0.006)GS(0.994)LEDDWDFLPPKK	4	0.20133	2	0.80226	0.76992	0.902439	1.28173	1.2166	1.11912
hsa05416 Viral myocarditis	0.779909	1	0.71	Q04637	1209	1.476	Up	0.0036813	S	Eukaryotic translation initiation factor 4 gamma 1 OS=Homo sapiens OX=9606 GN=EIF4G1 PE=1 SV=4	EIF4G1	0.987229	1.88979e-08	142.83	AAS(0.987)LT(0.013)EDRDR	3	0.20052	3	0.765114	0.914634	0.78147	1.27877	1.20686	1.14792
hsa05416 Viral myocarditis	0.779909	1	0.71	Q04637	1238	1.275	Up	0.031676	S	Eukaryotic translation initiation factor 4 gamma 1 OS=Homo sapiens OX=9606 GN=EIF4G1 PE=1 SV=4	EIF4G1	1	3.11341e-05	97.273	AALS(1)EEELEKK	3	0.11933	2	0.894945	0.825203	0.956697	1.27877	1.05146	1.08308
hsa05416 Viral myocarditis	0.779909	1	0.71	Q04637	1211	1.29	Up	8.3237e-05	T	Eukaryotic translation initiation factor 4 gamma 1 OS=Homo sapiens OX=9606 GN=EIF4G1 PE=1 SV=4	EIF4G1	0.954002	1.0225e-05	117.21	AAS(0.046)LT(0.954)EDRDR	2	0.23731	7	0.912785	0.868902	0.875126	1.14484	1.13421	1.14792
hsa05416 Viral myocarditis	0.779909	1	0.71	Q04637	1185	1.357	Up	0.0130396	S	Eukaryotic translation initiation factor 4 gamma 1 OS=Homo sapiens OX=9606 GN=EIF4G1 PE=1 SV=4	EIF4G1	1	0.00416773	67.643	S(1)FS(1)KEVEER	3	2.2231	2	0.800793	0.89939	0.881168	1.04365	1.29062	1.16819
hsa00053 Ascorbate and aldarate metabolism	0.0163265	2	7.81	O60701	476	1.327	Up	0.0030169	S	UDP-glucose 6-dehydrogenase OS=Homo sapiens OX=9606 GN=UGDH PE=1 SV=1	UGDH	0.999846	0.0185742	46.156	RIPYAPS(1)GEIPK	3	0.29322	1	0.86359	0.831967	0.896733	1.1763	1.06213	1.20229
hsa00053 Ascorbate and aldarate metabolism	0.0163265	2	7.81	P51648	293	2.199	Up	0.024818	S	Fatty aldehyde dehydrogenase OS=Homo sapiens OX=9606 GN=ALDH3A2 PE=1 SV=1	ALDH3A2	1	0.0232812	40.727	ILS(1)LLEGQK	3	-0.47646	1	0.890503	0.609589	0.418217	1.23077	1.32709	1.66071
hsa04210 Apoptosis	0.872947	3	0.63	Q13546	320	1.508	Up	0.0105427	S	Receptor-interacting serine/threonine-protein kinase 1 OS=Homo sapiens OX=9606 GN=RIPK1 PE=1 SV=3	RIPK1	1	6.96758e-05	92.289	MQS(1)LQLDCVAVPSSR	2	-0.26441	2	0.750795	0.850431	0.845521	1.39956	1.22883	1.06155
hsa04210 Apoptosis	0.872947	3	0.63	P55212	79	1.287	Up	0.043582	S	Caspase-6 OS=Homo sapiens OX=9606 GN=CASP6 PE=1 SV=2	CASP6	1	8.45676e-06	115.04	RFS(1)DLGFEVK	3	-0.43424	1	0.952083	0.972139	0.795374	1.03579	1.20737	1.25803
hsa04210 Apoptosis	0.872947	3	0.63	Q03252	421	1.257	Up	0.021079	S	Lamin-B2 OS=Homo sapiens OX=9606 GN=LMNB2 PE=1 SV=4	LMNB2	0.957371	3.43254e-05	99.663	ATS(0.002)S(0.036)S(0.957)S(0.005)GSLSATGR	2	-0.033156	3	0.885437	0.806358	0.98419	1.10671	1.08111	1.17563
hsa04370 VEGF signaling pathway	0.904144	1	0.46	Q16539	180	2.17	Up	0.00035653	T	Mitogen-activated protein kinase 14 OS=Homo sapiens OX=9606 GN=MAPK14 PE=1 SV=3	MAPK14	0.999883	0.000118317	84.508	HTDDEMT(1)GY(0.998)VAT(0.002)R	3	0.46926	1	0.71334	0.660397	0.573296	1.46596	1.41754	1.34139
hsa04370 VEGF signaling pathway	0.904144	1	0.46	Q16539	182	2.252	Up	3.8544e-05	Y	Mitogen-activated protein kinase 14 OS=Homo sapiens OX=9606 GN=MAPK14 PE=1 SV=3	MAPK14	0.998479	6.03326e-22	194.65	HTDDEMT(0.002)GY(0.998)VATR	2	0.15731	7	0.603595	0.666667	0.628385	1.48511	1.44154	1.34816
hsa04012 ErbB signaling pathway	0.991098	1	0.23	Q9UBS0	416	2.556	Up	0.00142006	S	Ribosomal protein S6 kinase beta-2 OS=Homo sapiens OX=9606 GN=RPS6KB2 PE=1 SV=2	RPS6KB2	0.994398	0.00771359	64.841	RLNS(0.994)S(0.006)PR	3	-0.54426	1	0.665977	0.612967	0.456459	1.3966	1.58972	1.4494
hsa05034 Alcoholism	0.716987	3	0.84	P16104	137	1.325	Up	0.0173591	T	Histone H2AX OS=Homo sapiens OX=9606 GN=H2AFX PE=1 SV=2	H2AFX	0.997749	0.0235602	63.091	KAT(0.998)QAS(0.406)QEY(0.597)	2	-0.28837	1	0.912811	0.93462	0.768145	1.2296	1.07862	1.15709
hsa05034 Alcoholism	0.716987	3	0.84	P0DP25	102	1.304	Up	0.00041989	S	Calmodulin-3 OS=Homo sapiens OX=9606 GN=CALM3 PE=1 SV=1	CALM3	1	0.000220671	86.987	VFDKDGNGYIS(1)AAELR	3	0.004572	1	0.860182	0.856137	0.893194	1.17683	1.09606	1.12946
hsa05034 Alcoholism	0.716987	3	0.84	Q71DI3	81	1.229	Up	0.023756	T	Histone H3.2 OS=Homo sapiens OX=9606 GN=HIST2H3A PE=1 SV=3	HIST2H3A	1	9.82525e-06	106.14	EIAQDFKT(1)DLR	3	0.51511	1	0.977055	0.809798	0.944172	1.10722	1.1442	1.1041
hsa04071 Sphingolipid signaling pathway	0.89234	2	0.56	Q16539	180	2.17	Up	0.00035653	T	Mitogen-activated protein kinase 14 OS=Homo sapiens OX=9606 GN=MAPK14 PE=1 SV=3	MAPK14	0.999883	0.000118317	84.508	HTDDEMT(1)GY(0.998)VAT(0.002)R	3	0.46926	1	0.71334	0.660397	0.573296	1.46596	1.41754	1.34139
hsa04071 Sphingolipid signaling pathway	0.89234	2	0.56	Q16539	182	2.252	Up	3.8544e-05	Y	Mitogen-activated protein kinase 14 OS=Homo sapiens OX=9606 GN=MAPK14 PE=1 SV=3	MAPK14	0.998479	6.03326e-22	194.65	HTDDEMT(0.002)GY(0.998)VATR	2	0.15731	7	0.603595	0.666667	0.628385	1.48511	1.44154	1.34816
hsa04071 Sphingolipid signaling pathway	0.89234	2	0.56	Q96G23	348	1.317	Up	0.0076218	S	Ceramide synthase 2 OS=Homo sapiens OX=9606 GN=CERS2 PE=1 SV=1	CERS2	0.985682	2.66028e-24	193.57	SDREET(0.028)ES(0.986)S(0.986)EGEEAAAGGGAK	3	0.24053	3	0.858775	0.851266	0.8917	1.07301	1.08815	1.26612
hsa04071 Sphingolipid signaling pathway	0.89234	2	0.56	Q96G23	349	1.36	Up	0.0057446	S	Ceramide synthase 2 OS=Homo sapiens OX=9606 GN=CERS2 PE=1 SV=1	CERS2	0.995372	2.66028e-24	193.57	LVEDERS(1)DREET(0.102)ES(0.902)S(0.995)EGEEAAAGGGAK	4	-0.5315	2	0.841121	0.822785	0.8917	1.05268	1.16588	1.25691
hsa04071 Sphingolipid signaling pathway	0.89234	2	0.56	Q96G23	341	1.31	Up	0.0023167	S	Ceramide synthase 2 OS=Homo sapiens OX=9606 GN=CERS2 PE=1 SV=1	CERS2	0.999999	1.71718e-25	196.15	LVEDERS(1)DREET(0.102)ES(0.902)S(0.995)EGEEAAAGGGAK	4	-0.5315	5	0.849429	0.89557	0.864372	1.11738	1.08152	1.21904
hsa04152 AMPK signaling pathway	0.431331	6	1.14	P61006	111	1.361	Up	0.0028797	S	Ras-related protein Rab-8A OS=Homo sapiens OX=9606 GN=RAB8A PE=1 SV=1	RAB8A	1	8.95918e-09	120.77	NIEEHAS(1)ADVEK	3	0.6417	3	0.922139	0.837624	0.815143	1.18374	1.21811	1.10375
hsa04152 AMPK signaling pathway	0.431331	6	1.14	P13639	59	4.294	Up	2.4997e-05	T	Elongation factor 2 OS=Homo sapiens OX=9606 GN=EEF2 PE=1 SV=4	EEF2	1	3.81618e-07	118.62	FT(1)DT(1)RKDEQER	4	0.33427	2	0.376258	0.417683	0.37577	1.79113	1.74926	1.48241
hsa04152 AMPK signaling pathway	0.431331	6	1.14	P13639	57	1.952	Up	0.00022337	T	Elongation factor 2 OS=Homo sapiens OX=9606 GN=EEF2 PE=1 SV=4	EEF2	1	3.81618e-07	118.62	FT(1)DT(1)RKDEQER	4	0.33427	6	0.669014	0.735772	0.667351	1.37537	1.42914	1.24121
hsa04152 AMPK signaling pathway	0.431331	6	1.14	P17858	775	1.607	Up	0.0032178	S	ATP-dependent 6-phosphofructokinase, liver type OS=Homo sapiens OX=9606 GN=PFKL PE=1 SV=6	PFKL	0.998656	0.000204798	94.688	RT(0.001)LS(0.999)MDK	3	0.30762	2	0.890542	0.706861	0.730489	1.21954	1.21528	1.30616
hsa04152 AMPK signaling pathway	0.431331	6	1.14	P17858	773	1.533	Up	0.00042209	T	ATP-dependent 6-phosphofructokinase, liver type OS=Homo sapiens OX=9606 GN=PFKL PE=1 SV=6	PFKL	0.939626	0.00104982	97.734	T(0.94)LS(0.06)MDKGF	2	0.77738	2	0.816153	0.79106	0.78564	1.27466	1.13234	1.26143
hsa04152 AMPK signaling pathway	0.431331	6	1.14	Q13131	524	1.223	Up	0.041024	S	5'-AMP-activated protein kinase catalytic subunit alpha-1 OS=Homo sapiens OX=9606 GN=PRKAA1 PE=1 SV=4	PRKAA1	0.818051	1.36024e-07	120.05	SSEVS(0.001)LT(0.029)S(0.151)S(0.818)VT(0.007)S(0.991)LDS(0.002)SPVDLTPR	3	0.64002	3	0.820746	0.947162	0.923009	1.20225	1.07925	1.00904
hsa04152 AMPK signaling pathway	0.431331	6	1.14	P13807	727	1.212	Up	0.036422	S	Glycogen [starch] synthase, muscle OS=Homo sapiens OX=9606 GN=GYS1 PE=1 SV=2	GYS1	0.907573	1.31659e-17	158.16	NSVDTATSSSLST(0.001)PS(0.008)EPLS(0.908)PT(0.055)S(0.012)S(0.017)LGEER	3	0.068497	1	0.805301	0.928736	0.980553	1.08566	1.05922	1.14395
hsa04152 AMPK signaling pathway	0.431331	6	1.14	Q9UBS0	416	2.556	Up	0.00142006	S	Ribosomal protein S6 kinase beta-2 OS=Homo sapiens OX=9606 GN=RPS6KB2 PE=1 SV=2	RPS6KB2	0.994398	0.00771359	64.841	RLNS(0.994)S(0.006)PR	3	-0.54426	1	0.665977	0.612967	0.456459	1.3966	1.58972	1.4494
hsa03030 DNA replication	0.24766	4	1.56	P15927	238	1.486	Up	0.0087597	S	Replication protein A 32 kDa subunit OS=Homo sapiens OX=9606 GN=RPA2 PE=1 SV=1	RPA2	0.951327	0.00157633	74.424	HMS(0.951)VS(0.048)SIK	3	-0.12673	1	0.815488	0.819404	0.849462	1.23469	1.05844	1.39783
hsa03030 DNA replication	0.24766	4	1.56	P39748	255	1.473	Up	0.023843	S	Flap endonuclease 1 OS=Homo sapiens OX=9606 GN=FEN1 PE=1 SV=1	FEN1	1	0.000509054	84.365	HKS(1)IEEIVR	3	0.29216	1	0.85423	0.69883	0.923591	1.387	1.08999	1.17061
hsa03030 DNA replication	0.24766	4	1.56	P33991	23	2.132	Up	0.0034804	T	DNA replication licensing factor MCM4 OS=Homo sapiens OX=9606 GN=MCM4 PE=1 SV=5	MCM4	0.99476	0.00451144	75.509	AT(0.005)PAQT(0.995)PR	2	-0.014991	1	0.802419	0.552192	0.589377	1.51309	1.31207	1.31934
hsa03030 DNA replication	0.24766	4	1.56	P33991	19	1.39	Up	0.042219	T	DNA replication licensing factor MCM4 OS=Homo sapiens OX=9606 GN=MCM4 PE=1 SV=5	MCM4	0.996616	0.00335351	81.799	AT(0.997)PAQT(0.003)PR	2	0.64858	1	0.747984	0.931106	0.85189	1.3162	1.22571	0.975586
hsa03030 DNA replication	0.24766	4	1.56	P33991	110	1.378	Up	0.00088143	T	DNA replication licensing factor MCM4 OS=Homo sapiens OX=9606 GN=MCM4 PE=1 SV=5	MCM4	0.996973	0.0167458	46.88	S(0.003)GVRGT(0.997)PVR	3	-0.80143	2	0.897177	0.835073	0.808989	1.13482	1.21099	1.15723
hsa03030 DNA replication	0.24766	4	1.56	P27694	315	1.282	Up	0.00102158	S	Replication protein A 70 kDa DNA-binding subunit OS=Homo sapiens OX=9606 GN=RPA1 PE=1 SV=2	RPA1	0.814062	0.000116879	85.087	S(0.186)KDS(0.814)LVDIIGICK	3	0.14761	1	0.897824	0.859223	0.911992	1.14528	1.09372	1.18359
hsa03030 DNA replication	0.24766	4	1.56	P27694	38	1.285	Up	0.046263	S	Replication protein A 70 kDa DNA-binding subunit OS=Homo sapiens OX=9606 GN=RPA1 PE=1 SV=2	RPA1	0.992594	0.000665856	77.597	PITT(0.007)GNS(0.993)PPR	2	1.8355	1	0.952696	0.852427	0.868472	1.33298	1.05751	1.04615
hsa04928 Parathyroid hormone synthesis, secretion and action	0.89234	2	0.56	Q92888	631	1.272	Up	0.00176281	S	Rho guanine nucleotide exchange factor 1 OS=Homo sapiens OX=9606 GN=ARHGEF1 PE=1 SV=2	ARHGEF1	0.989151	2.22082e-07	127.66	QS(0.011)S(0.989)DPMLSEFK	2	-0.053489	4	0.914454	0.886429	0.872137	1.20042	1.10505	1.09499
hsa04928 Parathyroid hormone synthesis, secretion and action	0.89234	2	0.56	Q12802	2563	1.343	Up	0.005404	S	A-kinase anchor protein 13 OS=Homo sapiens OX=9606 GN=AKAP13 PE=1 SV=2	AKAP13	0.853461	0.0119284	48.711	S(0.097)LS(0.853)RPS(0.025)S(0.025)LIEQEK	3	0.27327	1	0.896848	0.872763	0.818957	1.24455	1.16923	1.06156
hsa04928 Parathyroid hormone synthesis, secretion and action	0.89234	2	0.56	Q12802	1559	1.319	Up	0.00089534	S	A-kinase anchor protein 13 OS=Homo sapiens OX=9606 GN=AKAP13 PE=1 SV=2	AKAP13	0.994294	0.0226563	49.715	S(0.006)LS(0.994)PFRR	3	-0.081392	1	0.909265	0.883698	0.819905	1.13663	1.15385	1.15659
hsa04966 Collecting duct acid secretion	0.0821784	2	3.9	P38606	384	1.207	Up	0.0072382	S	V-type proton ATPase catalytic subunit A OS=Homo sapiens OX=9606 GN=ATP6V1A PE=1 SV=2	ATP6V1A	0.999827	0.0229082	48.091	LAS(1)FYER	2	-0.11556	1	0.972755	0.890411	0.889642	1.06165	1.11256	1.14769
hsa04966 Collecting duct acid secretion	0.0821784	2	3.9	Q9Y666	30	1.273	Up	0.0075152	T	Solute carrier family 12 member 7 OS=Homo sapiens OX=9606 GN=SLC12A7 PE=1 SV=3	SLC12A7	0.999953	6.96234e-08	126.42	TEAPGT(1)PEGPEPERPSPGDGNPR	3	-0.11933	1	0.95339	0.821791	0.901623	1.17996	1.09392	1.13268
hsa04659 Th17 cell differentiation	0.692834	3	0.87	Q16539	180	2.17	Up	0.00035653	T	Mitogen-activated protein kinase 14 OS=Homo sapiens OX=9606 GN=MAPK14 PE=1 SV=3	MAPK14	0.999883	0.000118317	84.508	HTDDEMT(1)GY(0.998)VAT(0.002)R	3	0.46926	1	0.71334	0.660397	0.573296	1.46596	1.41754	1.34139
hsa04659 Th17 cell differentiation	0.692834	3	0.87	Q16539	182	2.252	Up	3.8544e-05	Y	Mitogen-activated protein kinase 14 OS=Homo sapiens OX=9606 GN=MAPK14 PE=1 SV=3	MAPK14	0.998479	6.03326e-22	194.65	HTDDEMT(0.002)GY(0.998)VATR	2	0.15731	7	0.603595	0.666667	0.628385	1.48511	1.44154	1.34816
hsa04659 Th17 cell differentiation	0.692834	3	0.87	P43403	106	1.203	Up	0.036162	S	Tyrosine-protein kinase ZAP-70 OS=Homo sapiens OX=9606 GN=ZAP70 PE=1 SV=1	ZAP70	1	0.000234608	67.496	KPCNRPS(1)GLEPQPGVFDCLR	4	0.29141	1	0.872816	0.993097	0.896065	1.15692	1.15456	1.01118
hsa04659 Th17 cell differentiation	0.692834	3	0.87	P06239	158	1.297	Up	0.0058213	S	Tyrosine-protein kinase Lck OS=Homo sapiens OX=9606 GN=LCK PE=1 SV=6	LCK	0.899898	0.000522489	77.795	ES(0.021)ES(0.9)T(0.078)AGS(0.001)FSLSVR	2	-0.78547	1	0.796709	0.889423	0.924453	1.15988	1.13996	1.08577
hsa04659 Th17 cell differentiation	0.692834	3	0.87	P06239	394	1.225	Up	0.00126248	Y	Tyrosine-protein kinase Lck OS=Homo sapiens OX=9606 GN=LCK PE=1 SV=6	LCK	0.993133	5.27585e-10	153.34	LIEDNEY(0.993)T(0.007)AR	3	0.54142	3	0.893514	0.927885	0.865805	1.0854	1.13083	1.07669
hsa04659 Th17 cell differentiation	0.692834	3	0.87	P06239	505	1.276	Up	0.037598	Y	Tyrosine-protein kinase Lck OS=Homo sapiens OX=9606 GN=LCK PE=1 SV=6	LCK	0.999913	6.68754e-17	174.62	SVLEDFFTATEGQY(1)QPQP	2	-0.57314	3	1.00194	0.791346	0.847913	1.19067	1.13996	1.03935
hsa03013 RNA transport	0.175529	13	1.32	Q9UKV3	729	1.451	Up	0.000100134	S	Apoptotic chromatin condensation inducer in the nucleus OS=Homo sapiens OX=9606 GN=ACIN1 PE=1 SV=2	ACIN1	1	6.84502e-16	131.86	LQPERGS(1)PK	3	0.35558	3	0.845581	0.853682	0.802927	1.20508	1.18277	1.24339
hsa03013 RNA transport	0.175529	13	1.32	Q13769	328	1.754	Up	2.9251e-07	T	THO complex subunit 5 homolog OS=Homo sapiens OX=9606 GN=THOC5 PE=1 SV=2	THOC5	1	1.70527e-05	117.65	RRPT(1)LGVQLDDK	4	-0.2388	2	0.734448	0.73615	0.747563	1.29947	1.27733	1.31401
hsa03013 RNA transport	0.175529	13	1.32	O60841	595	1.348	Up	0.020678	S	Eukaryotic translation initiation factor 5B OS=Homo sapiens OX=9606 GN=EIF5B PE=1 SV=4	EIF5B	0.999983	9.19673e-11	144.5	EMSSDSEYDS(1)DDDRTKEER	4	-0.84573	1	0.949304	0.91857	0.733268	1.16272	1.14534	1.19918
hsa03013 RNA transport	0.175529	13	1.32	P12270	2155	1.372	Up	0.0013171	S	Nucleoprotein TPR OS=Homo sapiens OX=9606 GN=TPR PE=1 SV=3	TPR	1	9.31754e-16	167.87	TDGFAEAIHS(1)PQVAGVPR	2	-0.28406	2	0.891304	0.852036	0.825121	1.25226	1.13992	1.13264
hsa03013 RNA transport	0.175529	13	1.32	P12270	2137	2.066	Up	0.00061722	T	Nucleoprotein TPR OS=Homo sapiens OX=9606 GN=TPR PE=1 SV=3	TPR	0.939872	3.75324e-05	88.987	TVPS(0.039)T(0.94)PT(0.021)LVVPHR	3	-0.23909	2	0.655138	0.595829	0.763285	1.40905	1.41872	1.33368
hsa03013 RNA transport	0.175529	13	1.32	Q14152	574	1.35	Up	0.023243	T	Eukaryotic translation initiation factor 3 subunit A OS=Homo sapiens OX=9606 GN=EIF3A PE=1 SV=1	EIF3A	1	0.00564782	69.346	RQT(1)IEER	3	-0.57418	2	0.882583	0.799395	0.911111	1.11939	1.33569	1.04586
hsa03013 RNA transport	0.175529	13	1.32	P49792	2454	1.251	Up	0.043321	S	E3 SUMO-protein ligase RanBP2 OS=Homo sapiens OX=9606 GN=RANBP2 PE=1 SV=2	RANBP2	0.999983	8.42577e-05	92.039	DSLITPHVS(1)R	2	-0.064429	2	0.917308	0.881657	0.872745	0.958678	1.16817	1.21635
hsa03013 RNA transport	0.175529	13	1.32	P49792	2153	1.29	Up	0.049764	T	E3 SUMO-protein ligase RanBP2 OS=Homo sapiens OX=9606 GN=RANBP2 PE=1 SV=2	RANBP2	1	0.000593083	71.98	LLLDIPLQT(1)PHK	3	-0.053254	1	1.025	0.803748	0.813627	1.14979	1.22322	1.0349
hsa03013 RNA transport	0.175529	13	1.32	P49792	1412	1.208	Up	0.00147565	T	E3 SUMO-protein ligase RanBP2 OS=Homo sapiens OX=9606 GN=RANBP2 PE=1 SV=2	RANBP2	1	0.00972689	66.692	FALVT(1)PK	3	-0.40108	3	0.892308	0.933925	0.898798	1.06095	1.09409	1.13559
hsa03013 RNA transport	0.175529	13	1.32	Q8IYB3	207	1.269	Up	0.0136235	S	Serine/arginine repetitive matrix protein 1 OS=Homo sapiens OX=9606 GN=SRRM1 PE=1 SV=2	SRRM1	1	0.00466708	57.973	S(1)RS(1)PS(1)PAPEK	3	0.10975	3	0.842105	0.863402	0.982553	1.11785	1.08743	1.20633
hsa03013 RNA transport	0.175529	13	1.32	Q8IYB3	234	1.419	Up	0.00063768	S	Serine/arginine repetitive matrix protein 1 OS=Homo sapiens OX=9606 GN=SRRM1 PE=1 SV=2	SRRM1	0.992647	2.15069e-07	127.16	VKEPS(0.993)VQEAT(0.007)STSDILK	3	-0.75639	1	0.812394	0.880584	0.849403	1.16947	1.16831	1.26962
hsa03013 RNA transport	0.175529	13	1.32	Q8IYB3	752	1.269	Up	0.022597	S	Serine/arginine repetitive matrix protein 1 OS=Homo sapiens OX=9606 GN=SRRM1 PE=1 SV=2	SRRM1	1	4.12216e-07	124.07	S(1)VS(1)GS(1)PEPAAK	2	-0.4863	2	0.816638	0.884021	0.986226	1.08979	1.09617	1.22405
hsa03013 RNA transport	0.175529	13	1.32	Q8IYB3	220	1.302	Up	0.023278	T	Serine/arginine repetitive matrix protein 1 OS=Homo sapiens OX=9606 GN=SRRM1 PE=1 SV=2	SRRM1	0.99997	1.09402e-05	104.26	EKT(1)PELPEPSVK	5	-0.47579	10	0.904924	0.859107	0.890725	1.03255	1.11257	1.31266
hsa03013 RNA transport	0.175529	13	1.32	Q8IYB3	211	1.373	Up	0.0054224	S	Serine/arginine repetitive matrix protein 1 OS=Homo sapiens OX=9606 GN=SRRM1 PE=1 SV=2	SRRM1	1	0.000566937	68.481	S(1)RS(1)PS(1)PAPEK	3	0.10975	6	0.806452	0.841924	0.940312	1.18743	1.11038	1.25696
hsa03013 RNA transport	0.175529	13	1.32	Q8IYB3	308	1.76	Up	0.004382	S	Serine/arginine repetitive matrix protein 1 OS=Homo sapiens OX=9606 GN=SRRM1 PE=1 SV=2	SRRM1	0.976217	0.0394378	54.486	S(0.012)RS(0.976)Y(0.293)S(0.718)PR	2	0.34549	2	0.795416	0.70189	0.782369	1.15825	1.28962	1.56456
hsa03013 RNA transport	0.175529	13	1.32	Q8IYB3	209	1.62	Up	0.0031214	S	Serine/arginine repetitive matrix protein 1 OS=Homo sapiens OX=9606 GN=SRRM1 PE=1 SV=2	SRRM1	1	0.000566937	68.481	S(1)RS(1)PS(1)PAPEK	3	0.10975	6	0.712224	0.790378	0.87787	1.36364	1.17158	1.32025
hsa03013 RNA transport	0.175529	13	1.32	Q8IYB3	179	2.068	Up	0.00039734	S	Serine/arginine repetitive matrix protein 1 OS=Homo sapiens OX=9606 GN=SRRM1 PE=1 SV=2	SRRM1	0.899397	0.0193043	65.224	S(0.016)RS(0.899)PS(0.085)PR	2	1.0181	1	0.736842	0.662371	0.672176	1.38159	1.58907	1.31266
hsa03013 RNA transport	0.175529	13	1.32	Q8IYB3	416	1.651	Up	0.000158969	T	Serine/arginine repetitive matrix protein 1 OS=Homo sapiens OX=9606 GN=SRRM1 PE=1 SV=2	SRRM1	0.992922	7.13454e-05	105.89	T(0.014)RHS(0.991)PT(0.993)PQQS(0.002)NR	2	0.02307	5	0.788625	0.742268	0.825528	1.27609	1.26776	1.34684
hsa03013 RNA transport	0.175529	13	1.32	Q8IYB3	292	1.915	Up	0.0047784	S	Serine/arginine repetitive matrix protein 1 OS=Homo sapiens OX=9606 GN=SRRM1 PE=1 SV=2	SRRM1	0.999659	0.0021164	70.028	S(1)PSHTRPR	3	-0.8491	3	0.614601	0.841924	0.709826	1.35915	1.22514	1.56329
hsa03013 RNA transport	0.175529	13	1.32	Q8IYB3	532	2.48	Up	0.00116099	S	Serine/arginine repetitive matrix protein 1 OS=Homo sapiens OX=9606 GN=SRRM1 PE=1 SV=2	SRRM1	0.950872	0.0160328	55.461	S(0.003)AS(0.046)PS(0.951)PR	2	0.52352	1	0.56961	0.621993	0.671258	1.72278	1.25683	1.64051
hsa03013 RNA transport	0.175529	13	1.32	Q8IYB3	290	2.031	Up	0.0029777	S	Serine/arginine repetitive matrix protein 1 OS=Homo sapiens OX=9606 GN=SRRM1 PE=1 SV=2	SRRM1	0.974741	0.0121855	44.925	S(0.975)RS(0.721)PS(0.303)HT(0.002)RPR	3	0.62266	1	0.613752	0.717354	0.770432	1.52189	1.18907	1.55823
hsa03013 RNA transport	0.175529	13	1.32	Q9H307	66	2.067	Up	3.6745e-05	S	Pinin OS=Homo sapiens OX=9606 GN=PNN PE=1 SV=5	PNN	0.963561	3.61331e-07	109.79	RGFS(0.964)DS(0.036)GGGPPAK	4	0.24504	7	0.683495	0.700593	0.645594	1.39163	1.46396	1.33891
hsa03013 RNA transport	0.175529	13	1.32	Q9H307	381	1.213	Up	0.0081158	S	Pinin OS=Homo sapiens OX=9606 GN=PNN PE=1 SV=5	PNN	1	3.35821e-31	199.01	QQDS(1)QPEEVMDVLEMVENVK	3	-1.717	16	0.893204	0.988142	0.871648	1.13519	1.09848	1.1046
hsa03013 RNA transport	0.175529	13	1.32	Q04637	1209	1.476	Up	0.0036813	S	Eukaryotic translation initiation factor 4 gamma 1 OS=Homo sapiens OX=9606 GN=EIF4G1 PE=1 SV=4	EIF4G1	0.987229	1.88979e-08	142.83	AAS(0.987)LT(0.013)EDRDR	3	0.20052	3	0.765114	0.914634	0.78147	1.27877	1.20686	1.14792
hsa03013 RNA transport	0.175529	13	1.32	Q04637	1238	1.275	Up	0.031676	S	Eukaryotic translation initiation factor 4 gamma 1 OS=Homo sapiens OX=9606 GN=EIF4G1 PE=1 SV=4	EIF4G1	1	3.11341e-05	97.273	AALS(1)EEELEKK	3	0.11933	2	0.894945	0.825203	0.956697	1.27877	1.05146	1.08308
hsa03013 RNA transport	0.175529	13	1.32	Q04637	1211	1.29	Up	8.3237e-05	T	Eukaryotic translation initiation factor 4 gamma 1 OS=Homo sapiens OX=9606 GN=EIF4G1 PE=1 SV=4	EIF4G1	0.954002	1.0225e-05	117.21	AAS(0.046)LT(0.954)EDRDR	2	0.23731	7	0.912785	0.868902	0.875126	1.14484	1.13421	1.14792
hsa03013 RNA transport	0.175529	13	1.32	Q04637	1185	1.357	Up	0.0130396	S	Eukaryotic translation initiation factor 4 gamma 1 OS=Homo sapiens OX=9606 GN=EIF4G1 PE=1 SV=4	EIF4G1	1	0.00416773	67.643	S(1)FS(1)KEVEER	3	2.2231	2	0.800793	0.89939	0.881168	1.04365	1.29062	1.16819
hsa03013 RNA transport	0.175529	13	1.32	P49790	699	1.444	Up	9.9455e-05	T	Nuclear pore complex protein Nup153 OS=Homo sapiens OX=9606 GN=NUP153 PE=1 SV=2	NUP153	0.999977	0.000756464	90.697	QTGIET(1)PNK	3	-0.027991	3	0.858812	0.818544	0.795518	1.20594	1.17435	1.19166
hsa03013 RNA transport	0.175529	13	1.32	P49790	192	1.324	Up	0.00137591	S	Nuclear pore complex protein Nup153 OS=Homo sapiens OX=9606 GN=NUP153 PE=1 SV=2	NUP153	0.999918	7.56329e-05	98.943	AS(1)DKDITVSK	3	0.039653	3	0.888997	0.892323	0.811391	1.17516	1.1483	1.10824
hsa03013 RNA transport	0.175529	13	1.32	Q99613	654	1.219	Up	0.031338	S	Eukaryotic translation initiation factor 3 subunit C OS=Homo sapiens OX=9606 GN=EIF3C PE=1 SV=1	EIF3C	1	0.0707461	50.806	S(1)LQERNQEQEK	3	0.15947	1	0.937945	0.908821	0.894201	1.23116	1.00601	1.10505
hsa03013 RNA transport	0.175529	13	1.32	Q8NFH5	273	1.394	Up	0.023701	T	Nucleoporin NUP35 OS=Homo sapiens OX=9606 GN=NUP35 PE=1 SV=1	NUP35	0.925083	3.2653e-07	112.36	T(0.055)LGT(0.925)PT(0.02)QPGSTPR	2	-0.11134	1	0.770688	0.938053	0.794695	1.32049	1.13267	1.03772
hsa03013 RNA transport	0.175529	13	1.32	P52298	13	1.27	Up	0.00160108	S	Nuclear cap-binding protein subunit 2 OS=Homo sapiens OX=9606 GN=NCBP2 PE=1 SV=1	NCBP2	0.988003	2.95516e-05	97.203	S(0.01)DS(0.988)YVELS(0.002)QYR	2	0.77324	1	0.872984	0.909953	0.896353	1.20021	1.09753	1.10419
hsa04066 HIF-1 signaling pathway	0.816257	3	0.71	P17858	775	1.607	Up	0.0032178	S	ATP-dependent 6-phosphofructokinase, liver type OS=Homo sapiens OX=9606 GN=PFKL PE=1 SV=6	PFKL	0.998656	0.000204798	94.688	RT(0.001)LS(0.999)MDK	3	0.30762	2	0.890542	0.706861	0.730489	1.21954	1.21528	1.30616
hsa04066 HIF-1 signaling pathway	0.816257	3	0.71	P17858	773	1.533	Up	0.00042209	T	ATP-dependent 6-phosphofructokinase, liver type OS=Homo sapiens OX=9606 GN=PFKL PE=1 SV=6	PFKL	0.939626	0.00104982	97.734	T(0.94)LS(0.06)MDKGF	2	0.77738	2	0.816153	0.79106	0.78564	1.27466	1.13234	1.26143
hsa04066 HIF-1 signaling pathway	0.816257	3	0.71	P02786	34	1.775	Up	0.0023643	S	Transferrin receptor protein 1 OS=Homo sapiens OX=9606 GN=TFRC PE=1 SV=2	TFRC	1	8.18211e-06	99.747	QVDGDNS(1)HVEMK	3	-0.82969	1	0.637374	0.797571	0.744637	1.40239	1.29349	1.17362
hsa04066 HIF-1 signaling pathway	0.816257	3	0.71	Q9UBS0	416	2.556	Up	0.00142006	S	Ribosomal protein S6 kinase beta-2 OS=Homo sapiens OX=9606 GN=RPS6KB2 PE=1 SV=2	RPS6KB2	0.994398	0.00771359	64.841	RLNS(0.994)S(0.006)PR	3	-0.54426	1	0.665977	0.612967	0.456459	1.3966	1.58972	1.4494
hsa04145 Phagosome	0.13805	6	1.67	P07437	172	1.385	Up	0.000179802	S	Tubulin beta chain OS=Homo sapiens OX=9606 GN=TUBB PE=1 SV=2	TUBB	0.997835	8.00409e-05	85.554	IMNTFS(0.002)VVPS(0.998)PK	3	-0.5506	4	0.848756	0.813527	0.880228	1.1734	1.1565	1.19157
hsa04145 Phagosome	0.13805	6	1.67	P07437	40	1.369	Up	0.0033589	S	Tubulin beta chain OS=Homo sapiens OX=9606 GN=TUBB PE=1 SV=2	TUBB	0.983273	1.21144e-17	160.45	FWEVISDEHGIDPT(0.001)GT(0.016)YHGDS(0.983)DLQLDR	4	-1.4045	2	0.79005	0.894686	0.86692	1.16383	1.09654	1.2327
hsa04145 Phagosome	0.13805	6	1.67	P07437	285	2.476	Up	0.000124214	T	Tubulin beta chain OS=Homo sapiens OX=9606 GN=TUBB PE=1 SV=2	TUBB	0.998826	1.69394e-16	165.66	ALT(0.999)VPELT(0.001)QQVFDAK	3	0.87042	1	0.641791	0.568116	0.576996	1.56489	1.52337	1.33601
hsa04145 Phagosome	0.13805	6	1.67	P38606	384	1.207	Up	0.0072382	S	V-type proton ATPase catalytic subunit A OS=Homo sapiens OX=9606 GN=ATP6V1A PE=1 SV=2	ATP6V1A	0.999827	0.0229082	48.091	LAS(1)FYER	2	-0.11556	1	0.972755	0.890411	0.889642	1.06165	1.11256	1.14769
hsa04145 Phagosome	0.13805	6	1.67	P02786	34	1.775	Up	0.0023643	S	Transferrin receptor protein 1 OS=Homo sapiens OX=9606 GN=TFRC PE=1 SV=2	TFRC	1	8.18211e-06	99.747	QVDGDNS(1)HVEMK	3	-0.82969	1	0.637374	0.797571	0.744637	1.40239	1.29349	1.17362
hsa04145 Phagosome	0.13805	6	1.67	P27797	195	1.462	Up	0.0035425	S	Calreticulin OS=Homo sapiens OX=9606 GN=CALR PE=1 SV=1	CALR	0.993692	1.82952e-08	129.72	IDNSQVES(0.006)GS(0.994)LEDDWDFLPPKK	4	0.20133	2	0.80226	0.76992	0.902439	1.28173	1.2166	1.11912
hsa04145 Phagosome	0.13805	6	1.67	O75396	168	1.826	Up	0.00040315	S	Vesicle-trafficking protein SEC22b OS=Homo sapiens OX=9606 GN=SEC22B PE=1 SV=4	SEC22B	0.999853	2.06729e-08	131.33	GEALSALDS(1)KANNLSSLSK	3	0.16921	3	0.767396	0.675413	0.720408	1.22189	1.31827	1.40965
hsa04145 Phagosome	0.13805	6	1.67	Q15904	465	1.508	Up	0.02214	S	V-type proton ATPase subunit S1 OS=Homo sapiens OX=9606 GN=ATP6AP1 PE=1 SV=2	ATP6AP1	0.905009	0.00787348	58.172	GPT(0.056)IS(0.905)LT(0.039)QIV	2	-0.28731	1	0.829135	0.661563	0.976657	1.19661	1.21403	1.30917
hsa04520 Adherens junction	0.945044	1	0.37	Q8WWI1	246	1.409	Up	0.0073802	S	LIM domain only protein 7 OS=Homo sapiens OX=9606 GN=LMO7 PE=1 SV=3	LMO7	0.999959	2.9767e-10	132.74	REDS(1)FESLDSLGSR	3	0.19512	3	0.777419	0.944816	0.916376	1.2624	1.29354	1.16147
hsa04520 Adherens junction	0.945044	1	0.37	Q8WWI1	1048	1.331	Up	0.016876	T	LIM domain only protein 7 OS=Homo sapiens OX=9606 GN=LMO7 PE=1 SV=3	LMO7	0.999761	0.00932876	56.434	ISINQT(1)PGK	3	-0.73215	1	0.879032	0.923077	0.912021	1.21018	1.05725	1.34561
hsa04520 Adherens junction	0.945044	1	0.37	Q8WWI1	867	1.418	Up	0.027619	S	LIM domain only protein 7 OS=Homo sapiens OX=9606 GN=LMO7 PE=1 SV=3	LMO7	0.966117	3.81979e-06	88.688	VTTEIQLPS(0.034)QS(0.966)PVEEQSPASLSSLR	3	0.72285	1	0.774194	0.948161	0.916376	1.37859	1.05725	1.30595
hsa00240 Pyrimidine metabolism	0.85468	1	0.56	P17812	562	1.326	Up	0.0026025	S	CTP synthase 1 OS=Homo sapiens OX=9606 GN=CTPS1 PE=1 SV=2	CTPS1	1	0.00921694	58.981	GCRLS(1)PR	3	-0.75779	3	0.915578	0.830421	0.859343	1.22222	1.12741	1.10419
hsa04920 Adipocytokine signaling pathway	0.85468	1	0.56	Q13131	524	1.223	Up	0.041024	S	5'-AMP-activated protein kinase catalytic subunit alpha-1 OS=Homo sapiens OX=9606 GN=PRKAA1 PE=1 SV=4	PRKAA1	0.818051	1.36024e-07	120.05	SSEVS(0.001)LT(0.029)S(0.151)S(0.818)VT(0.007)S(0.991)LDS(0.002)SPVDLTPR	3	0.64002	3	0.820746	0.947162	0.923009	1.20225	1.07925	1.00904
hsa00030 Pentose phosphate pathway	0.125717	3	2.34	P29401	287	1.391	Up	0.0089756	T	Transketolase OS=Homo sapiens OX=9606 GN=TKT PE=1 SV=3	TKT	1	2.62253e-10	138.44	ILAT(1)PPQEDAPSVDIANIR	3	1.2452	1	0.76567	0.870406	0.904382	1.26971	1.18769	1.07646
hsa00030 Pentose phosphate pathway	0.125717	3	2.34	P17858	775	1.607	Up	0.0032178	S	ATP-dependent 6-phosphofructokinase, liver type OS=Homo sapiens OX=9606 GN=PFKL PE=1 SV=6	PFKL	0.998656	0.000204798	94.688	RT(0.001)LS(0.999)MDK	3	0.30762	2	0.890542	0.706861	0.730489	1.21954	1.21528	1.30616
hsa00030 Pentose phosphate pathway	0.125717	3	2.34	P17858	773	1.533	Up	0.00042209	T	ATP-dependent 6-phosphofructokinase, liver type OS=Homo sapiens OX=9606 GN=PFKL PE=1 SV=6	PFKL	0.939626	0.00104982	97.734	T(0.94)LS(0.06)MDKGF	2	0.77738	2	0.816153	0.79106	0.78564	1.27466	1.13234	1.26143
hsa00030 Pentose phosphate pathway	0.125717	3	2.34	P36871	117	1.45	Up	7.5365e-05	S	Phosphoglucomutase-1 OS=Homo sapiens OX=9606 GN=PGM1 PE=1 SV=3	PGM1	0.99941	5.8922e-32	216.64	AIGGIILT(0.001)AS(0.999)HNPGGPNGDFGIK	2	1.0916	12	0.830151	0.863302	0.80746	1.18924	1.2058	1.23173
hsa04611 Platelet activation	0.309872	6	1.3	Q16539	180	2.17	Up	0.00035653	T	Mitogen-activated protein kinase 14 OS=Homo sapiens OX=9606 GN=MAPK14 PE=1 SV=3	MAPK14	0.999883	0.000118317	84.508	HTDDEMT(1)GY(0.998)VAT(0.002)R	3	0.46926	1	0.71334	0.660397	0.573296	1.46596	1.41754	1.34139
hsa04611 Platelet activation	0.309872	6	1.3	Q16539	182	2.252	Up	3.8544e-05	Y	Mitogen-activated protein kinase 14 OS=Homo sapiens OX=9606 GN=MAPK14 PE=1 SV=3	MAPK14	0.998479	6.03326e-22	194.65	HTDDEMT(0.002)GY(0.998)VATR	2	0.15731	7	0.603595	0.666667	0.628385	1.48511	1.44154	1.34816
hsa04611 Platelet activation	0.309872	6	1.3	O00161	161	1.378	Up	0.0021249	S	Synaptosomal-associated protein 23 OS=Homo sapiens OX=9606 GN=SNAP23 PE=1 SV=1	SNAP23	0.999996	1.01083e-10	144.5	ITNDAREDEMEENLTQVGS(1)ILGNLK	4	-1.1246	6	0.851852	0.876698	0.792564	1.08745	1.16272	1.22312
hsa04611 Platelet activation	0.309872	6	1.3	Q9NZN5	736	1.276	Up	0.0105604	T	Rho guanine nucleotide exchange factor 12 OS=Homo sapiens OX=9606 GN=ARHGEF12 PE=1 SV=1	ARHGEF12	0.992543	0.000558217	67.234	VT(0.007)EHGT(0.993)PKPFR	4	-0.24544	1	0.852473	0.908913	0.901341	1.02703	1.15762	1.21173
hsa04611 Platelet activation	0.309872	6	1.3	Q92888	631	1.272	Up	0.00176281	S	Rho guanine nucleotide exchange factor 1 OS=Homo sapiens OX=9606 GN=ARHGEF1 PE=1 SV=2	ARHGEF1	0.989151	2.22082e-07	127.66	QS(0.011)S(0.989)DPMLSEFK	2	-0.053489	4	0.914454	0.886429	0.872137	1.20042	1.10505	1.09499
hsa04611 Platelet activation	0.309872	6	1.3	P19105	18	1.605	Up	0.000183171	T	Myosin regulatory light chain 12A OS=Homo sapiens OX=9606 GN=MYL12A PE=1 SV=2	MYL12A	1	4.14264e-31	198.67	AT(1)S(1)NVFAMFDQSQIQEFK	3	-1.5076	12	0.768317	0.748357	0.82846	1.30126	1.23173	1.22992
hsa04611 Platelet activation	0.309872	6	1.3	P19105	19	1.359	Up	5.7321e-05	S	Myosin regulatory light chain 12A OS=Homo sapiens OX=9606 GN=MYL12A PE=1 SV=2	MYL12A	1	3.22787e-64	273.37	AT(1)S(1)NVFAMFDQSQIQEFK	3	-1.5076	20	0.858416	0.841315	0.871345	1.16632	1.19102	1.13655
hsa04611 Platelet activation	0.309872	6	1.3	O14974	871	1.287	Up	0.048356	S	Protein phosphatase 1 regulatory subunit 12A OS=Homo sapiens OX=9606 GN=PPP1R12A PE=1 SV=1	PPP1R12A	0.970474	5.92247e-68	268.3	STGVSFWTQDSDENEQEQQS(0.97)DT(0.029)EEGSNKK	4	-0.88047	1	0.846008	0.805634	0.976407	1.14407	1.12945	1.1093
hsa04380 Osteoclast differentiation	0.865964	2	0.6	Q16539	180	2.17	Up	0.00035653	T	Mitogen-activated protein kinase 14 OS=Homo sapiens OX=9606 GN=MAPK14 PE=1 SV=3	MAPK14	0.999883	0.000118317	84.508	HTDDEMT(1)GY(0.998)VAT(0.002)R	3	0.46926	1	0.71334	0.660397	0.573296	1.46596	1.41754	1.34139
hsa04380 Osteoclast differentiation	0.865964	2	0.6	Q16539	182	2.252	Up	3.8544e-05	Y	Mitogen-activated protein kinase 14 OS=Homo sapiens OX=9606 GN=MAPK14 PE=1 SV=3	MAPK14	0.998479	6.03326e-22	194.65	HTDDEMT(0.002)GY(0.998)VATR	2	0.15731	7	0.603595	0.666667	0.628385	1.48511	1.44154	1.34816
hsa04380 Osteoclast differentiation	0.865964	2	0.6	P06239	158	1.297	Up	0.0058213	S	Tyrosine-protein kinase Lck OS=Homo sapiens OX=9606 GN=LCK PE=1 SV=6	LCK	0.899898	0.000522489	77.795	ES(0.021)ES(0.9)T(0.078)AGS(0.001)FSLSVR	2	-0.78547	1	0.796709	0.889423	0.924453	1.15988	1.13996	1.08577
hsa04380 Osteoclast differentiation	0.865964	2	0.6	P06239	394	1.225	Up	0.00126248	Y	Tyrosine-protein kinase Lck OS=Homo sapiens OX=9606 GN=LCK PE=1 SV=6	LCK	0.993133	5.27585e-10	153.34	LIEDNEY(0.993)T(0.007)AR	3	0.54142	3	0.893514	0.927885	0.865805	1.0854	1.13083	1.07669
hsa04380 Osteoclast differentiation	0.865964	2	0.6	P06239	505	1.276	Up	0.037598	Y	Tyrosine-protein kinase Lck OS=Homo sapiens OX=9606 GN=LCK PE=1 SV=6	LCK	0.999913	6.68754e-17	174.62	SVLEDFFTATEGQY(1)QPQP	2	-0.57314	3	1.00194	0.791346	0.847913	1.19067	1.13996	1.03935
hsa04972 Pancreatic secretion	0.889871	1	0.49	P61006	111	1.361	Up	0.0028797	S	Ras-related protein Rab-8A OS=Homo sapiens OX=9606 GN=RAB8A PE=1 SV=1	RAB8A	1	8.95918e-09	120.77	NIEEHAS(1)ADVEK	3	0.6417	3	0.922139	0.837624	0.815143	1.18374	1.21811	1.10375
hsa03022 Basal transcription factors	0.591394	2	1.04	P78347	558	1.303	Up	0.033576	T	General transcription factor II-I OS=Homo sapiens OX=9606 GN=GTF2I PE=1 SV=2	GTF2I	0.85532	3.28393e-07	110.35	T(0.145)NT(0.855)PVKEDWNVR	3	0.046344	2	0.794206	0.998031	0.825301	1.24314	1.07411	1.09413
hsa03022 Basal transcription factors	0.591394	2	1.04	P51948	51	1.361	Up	0.0101225	T	CDK-activating kinase assembly factor MAT1 OS=Homo sapiens OX=9606 GN=MNAT1 PE=1 SV=1	MNAT1	1	0.0057931	61.821	GAGNCPECGT(1)PLRK	3	-1.0017	1	0.884692	0.78192	0.914176	1.2753	1.08342	1.15416
hsa05161 Hepatitis B	0.99201	2	0.31	Q16539	180	2.17	Up	0.00035653	T	Mitogen-activated protein kinase 14 OS=Homo sapiens OX=9606 GN=MAPK14 PE=1 SV=3	MAPK14	0.999883	0.000118317	84.508	HTDDEMT(1)GY(0.998)VAT(0.002)R	3	0.46926	1	0.71334	0.660397	0.573296	1.46596	1.41754	1.34139
hsa05161 Hepatitis B	0.99201	2	0.31	Q16539	182	2.252	Up	3.8544e-05	Y	Mitogen-activated protein kinase 14 OS=Homo sapiens OX=9606 GN=MAPK14 PE=1 SV=3	MAPK14	0.998479	6.03326e-22	194.65	HTDDEMT(0.002)GY(0.998)VATR	2	0.15731	7	0.603595	0.666667	0.628385	1.48511	1.44154	1.34816
hsa05161 Hepatitis B	0.99201	2	0.31	Q15904	465	1.508	Up	0.02214	S	V-type proton ATPase subunit S1 OS=Homo sapiens OX=9606 GN=ATP6AP1 PE=1 SV=2	ATP6AP1	0.905009	0.00787348	58.172	GPT(0.056)IS(0.905)LT(0.039)QIV	2	-0.28731	1	0.829135	0.661563	0.976657	1.19661	1.21403	1.30917
hsa00410 beta-Alanine metabolism	0.23986	1	3.9	P51648	293	2.199	Up	0.024818	S	Fatty aldehyde dehydrogenase OS=Homo sapiens OX=9606 GN=ALDH3A2 PE=1 SV=1	ALDH3A2	1	0.0232812	40.727	ILS(1)LLEGQK	3	-0.47646	1	0.890503	0.609589	0.418217	1.23077	1.32709	1.66071
hsa04727 GABAergic synapse	0.709897	1	0.87	P60520	10	1.463	Up	0.023264	S	Gamma-aminobutyric acid receptor-associated protein-like 2 OS=Homo sapiens OX=9606 GN=GABARAPL2 PE=1 SV=1	GABARAPL2	1	0.000694321	89.171	EDHS(1)LEHR	3	0.29567	1	0.751445	0.85458	0.882114	1	1.31208	1.32753
hsa05169 Epstein-Barr virus infection	0.90227	5	0.65	Q16539	180	2.17	Up	0.00035653	T	Mitogen-activated protein kinase 14 OS=Homo sapiens OX=9606 GN=MAPK14 PE=1 SV=3	MAPK14	0.999883	0.000118317	84.508	HTDDEMT(1)GY(0.998)VAT(0.002)R	3	0.46926	1	0.71334	0.660397	0.573296	1.46596	1.41754	1.34139
hsa05169 Epstein-Barr virus infection	0.90227	5	0.65	Q16539	182	2.252	Up	3.8544e-05	Y	Mitogen-activated protein kinase 14 OS=Homo sapiens OX=9606 GN=MAPK14 PE=1 SV=3	MAPK14	0.998479	6.03326e-22	194.65	HTDDEMT(0.002)GY(0.998)VATR	2	0.15731	7	0.603595	0.666667	0.628385	1.48511	1.44154	1.34816
hsa05169 Epstein-Barr virus infection	0.90227	5	0.65	Q13546	320	1.508	Up	0.0105427	S	Receptor-interacting serine/threonine-protein kinase 1 OS=Homo sapiens OX=9606 GN=RIPK1 PE=1 SV=3	RIPK1	1	6.96758e-05	92.289	MQS(1)LQLDCVAVPSSR	2	-0.26441	2	0.750795	0.850431	0.845521	1.39956	1.22883	1.06155
hsa05169 Epstein-Barr virus infection	0.90227	5	0.65	P08670	430	1.362	Up	0.00045529	S	Vimentin OS=Homo sapiens OX=9606 GN=VIM PE=1 SV=4	VIM	0.99998	1.32958e-11	149.44	ETNLDS(1)LPLVDTHSK	3	-0.077066	3	0.893023	0.838123	0.838123	1.125	1.16737	1.20597
hsa05169 Epstein-Barr virus infection	0.90227	5	0.65	P27797	195	1.462	Up	0.0035425	S	Calreticulin OS=Homo sapiens OX=9606 GN=CALR PE=1 SV=1	CALR	0.993692	1.82952e-08	129.72	IDNSQVES(0.006)GS(0.994)LEDDWDFLPPKK	4	0.20133	2	0.80226	0.76992	0.902439	1.28173	1.2166	1.11912
hsa05169 Epstein-Barr virus infection	0.90227	5	0.65	P55036	266	1.427	Up	0.001982	S	26S proteasome non-ATPase regulatory subunit 4 OS=Homo sapiens OX=9606 GN=PSMD4 PE=1 SV=1	PSMD4	0.964343	0.000553854	79.885	MT(0.036)IS(0.964)QQEFGR	2	-0.45011	2	0.770398	0.817097	0.905488	1.19193	1.21502	1.1513
hsa05322 Systemic lupus erythematosus	0.0415114	4	2.84	P16104	137	1.325	Up	0.0173591	T	Histone H2AX OS=Homo sapiens OX=9606 GN=H2AFX PE=1 SV=2	H2AFX	0.997749	0.0235602	63.091	KAT(0.998)QAS(0.406)QEY(0.597)	2	-0.28837	1	0.912811	0.93462	0.768145	1.2296	1.07862	1.15709
hsa05322 Systemic lupus erythematosus	0.0415114	4	2.84	P05455	92	1.332	Up	0.0025383	S	Lupus La protein OS=Homo sapiens OX=9606 GN=SSB PE=1 SV=2	SSB	0.979554	2.54634e-11	144.63	S(0.98)PS(0.02)KPLPEVTDEYK	3	0.57266	6	0.903483	0.820236	0.877734	1.08408	1.18154	1.19917
hsa05322 Systemic lupus erythematosus	0.0415114	4	2.84	P10155	19	1.255	Up	0.04758	S	60 kDa SS-A/Ro ribonucleoprotein OS=Homo sapiens OX=9606 GN=RO60 PE=1 SV=2	RO60	1	1.56678e-22	179.17	QIANS(1)QDGYVWQVTDMNR	3	-0.071838	3	0.840525	0.946341	0.892399	1.28149	1.01468	1.06546
hsa05322 Systemic lupus erythematosus	0.0415114	4	2.84	Q71DI3	81	1.229	Up	0.023756	T	Histone H3.2 OS=Homo sapiens OX=9606 GN=HIST2H3A PE=1 SV=3	HIST2H3A	1	9.82525e-06	106.14	EIAQDFKT(1)DLR	3	0.51511	1	0.977055	0.809798	0.944172	1.10722	1.1442	1.1041
hsa05323 Rheumatoid arthritis	0.222736	2	2.23	P38606	384	1.207	Up	0.0072382	S	V-type proton ATPase catalytic subunit A OS=Homo sapiens OX=9606 GN=ATP6V1A PE=1 SV=2	ATP6V1A	0.999827	0.0229082	48.091	LAS(1)FYER	2	-0.11556	1	0.972755	0.890411	0.889642	1.06165	1.11256	1.14769
hsa05323 Rheumatoid arthritis	0.222736	2	2.23	Q15904	465	1.508	Up	0.02214	S	V-type proton ATPase subunit S1 OS=Homo sapiens OX=9606 GN=ATP6AP1 PE=1 SV=2	ATP6AP1	0.905009	0.00787348	58.172	GPT(0.056)IS(0.905)LT(0.039)QIV	2	-0.28731	1	0.829135	0.661563	0.976657	1.19661	1.21403	1.30917
hsa04932 Non-alcoholic fatty liver disease (NAFLD)	0.873486	1	0.52	Q13131	524	1.223	Up	0.041024	S	5'-AMP-activated protein kinase catalytic subunit alpha-1 OS=Homo sapiens OX=9606 GN=PRKAA1 PE=1 SV=4	PRKAA1	0.818051	1.36024e-07	120.05	SSEVS(0.001)LT(0.029)S(0.151)S(0.818)VT(0.007)S(0.991)LDS(0.002)SPVDLTPR	3	0.64002	3	0.820746	0.947162	0.923009	1.20225	1.07925	1.00904
hsa04640 Hematopoietic cell lineage	0.226288	3	1.8	P02786	34	1.775	Up	0.0023643	S	Transferrin receptor protein 1 OS=Homo sapiens OX=9606 GN=TFRC PE=1 SV=2	TFRC	1	8.18211e-06	99.747	QVDGDNS(1)HVEMK	3	-0.82969	1	0.637374	0.797571	0.744637	1.40239	1.29349	1.17362
hsa04640 Hematopoietic cell lineage	0.226288	3	1.8	P06127	439	1.555	Up	0.0076563	S	T-cell surface glycoprotein CD5 OS=Homo sapiens OX=9606 GN=CD5 PE=1 SV=2	CD5	0.999997	9.77422e-42	228.46	S(1)HAENPTASHVDNEYSQPPR	3	0.16163	1	0.77889	0.892073	0.72196	1.14572	1.17287	1.40127
hsa04640 Hematopoietic cell lineage	0.226288	3	1.8	P06127	483	1.38	Up	0.0072375	S	T-cell surface glycoprotein CD5 OS=Homo sapiens OX=9606 GN=CD5 PE=1 SV=2	CD5	0.971208	1.04178e-10	140.45	SSMQPDNS(0.026)S(0.971)DS(0.003)DYDLHGAQR	3	-0.16353	2	0.863512	0.914995	0.775683	1.08765	1.18162	1.2566
hsa04640 Hematopoietic cell lineage	0.226288	3	1.8	P06729	347	1.348	Up	0.03564	S	T-cell surface antigen CD2 OS=Homo sapiens OX=9606 GN=CD2 PE=1 SV=2	CD2	0.887012	0.000130499	85.013	VQPKPPHGAAENS(0.113)LS(0.887)PSSN	3	-0.08739	1	0.817391	0.861395	0.922275	1.38073	1.06614	1.06061
hsa04625 C-type lectin receptor signaling pathway	0.79912	3	0.73	Q16539	180	2.17	Up	0.00035653	T	Mitogen-activated protein kinase 14 OS=Homo sapiens OX=9606 GN=MAPK14 PE=1 SV=3	MAPK14	0.999883	0.000118317	84.508	HTDDEMT(1)GY(0.998)VAT(0.002)R	3	0.46926	1	0.71334	0.660397	0.573296	1.46596	1.41754	1.34139
hsa04625 C-type lectin receptor signaling pathway	0.79912	3	0.73	Q16539	182	2.252	Up	3.8544e-05	Y	Mitogen-activated protein kinase 14 OS=Homo sapiens OX=9606 GN=MAPK14 PE=1 SV=3	MAPK14	0.998479	6.03326e-22	194.65	HTDDEMT(0.002)GY(0.998)VATR	2	0.15731	7	0.603595	0.666667	0.628385	1.48511	1.44154	1.34816
hsa04625 C-type lectin receptor signaling pathway	0.79912	3	0.73	Q9NZN5	736	1.276	Up	0.0105604	T	Rho guanine nucleotide exchange factor 12 OS=Homo sapiens OX=9606 GN=ARHGEF12 PE=1 SV=1	ARHGEF12	0.992543	0.000558217	67.234	VT(0.007)EHGT(0.993)PKPFR	4	-0.24544	1	0.852473	0.908913	0.901341	1.02703	1.15762	1.21173
hsa04625 C-type lectin receptor signaling pathway	0.79912	3	0.73	P0DP25	102	1.304	Up	0.00041989	S	Calmodulin-3 OS=Homo sapiens OX=9606 GN=CALM3 PE=1 SV=1	CALM3	1	0.000220671	86.987	VFDKDGNGYIS(1)AAELR	3	0.004572	1	0.860182	0.856137	0.893194	1.17683	1.09606	1.12946
hsa04142 Lysosome	0.511111	2	1.2	Q9NZ52	425	1.452	Up	0.0070969	S	ADP-ribosylation factor-binding protein GGA3 OS=Homo sapiens OX=9606 GN=GGA3 PE=1 SV=1	GGA3	0.986345	8.56628e-07	115.66	EQS(0.986)DLDFFS(0.014)PR	2	-0.42238	1	0.740947	0.84565	0.923633	1.13889	1.29464	1.21103
hsa04142 Lysosome	0.511111	2	1.2	Q15904	465	1.508	Up	0.02214	S	V-type proton ATPase subunit S1 OS=Homo sapiens OX=9606 GN=ATP6AP1 PE=1 SV=2	ATP6AP1	0.905009	0.00787348	58.172	GPT(0.056)IS(0.905)LT(0.039)QIV	2	-0.28731	1	0.829135	0.661563	0.976657	1.19661	1.21403	1.30917
hsa04750 Inflammatory mediator regulation of TRP channels	0.850672	2	0.62	Q16539	180	2.17	Up	0.00035653	T	Mitogen-activated protein kinase 14 OS=Homo sapiens OX=9606 GN=MAPK14 PE=1 SV=3	MAPK14	0.999883	0.000118317	84.508	HTDDEMT(1)GY(0.998)VAT(0.002)R	3	0.46926	1	0.71334	0.660397	0.573296	1.46596	1.41754	1.34139
hsa04750 Inflammatory mediator regulation of TRP channels	0.850672	2	0.62	Q16539	182	2.252	Up	3.8544e-05	Y	Mitogen-activated protein kinase 14 OS=Homo sapiens OX=9606 GN=MAPK14 PE=1 SV=3	MAPK14	0.998479	6.03326e-22	194.65	HTDDEMT(0.002)GY(0.998)VATR	2	0.15731	7	0.603595	0.666667	0.628385	1.48511	1.44154	1.34816
hsa04750 Inflammatory mediator regulation of TRP channels	0.850672	2	0.62	P0DP25	102	1.304	Up	0.00041989	S	Calmodulin-3 OS=Homo sapiens OX=9606 GN=CALM3 PE=1 SV=1	CALM3	1	0.000220671	86.987	VFDKDGNGYIS(1)AAELR	3	0.004572	1	0.860182	0.856137	0.893194	1.17683	1.09606	1.12946
hsa04620 Toll-like receptor signaling pathway	0.627719	2	0.98	Q16539	180	2.17	Up	0.00035653	T	Mitogen-activated protein kinase 14 OS=Homo sapiens OX=9606 GN=MAPK14 PE=1 SV=3	MAPK14	0.999883	0.000118317	84.508	HTDDEMT(1)GY(0.998)VAT(0.002)R	3	0.46926	1	0.71334	0.660397	0.573296	1.46596	1.41754	1.34139
hsa04620 Toll-like receptor signaling pathway	0.627719	2	0.98	Q16539	182	2.252	Up	3.8544e-05	Y	Mitogen-activated protein kinase 14 OS=Homo sapiens OX=9606 GN=MAPK14 PE=1 SV=3	MAPK14	0.998479	6.03326e-22	194.65	HTDDEMT(0.002)GY(0.998)VATR	2	0.15731	7	0.603595	0.666667	0.628385	1.48511	1.44154	1.34816
hsa04620 Toll-like receptor signaling pathway	0.627719	2	0.98	Q13546	320	1.508	Up	0.0105427	S	Receptor-interacting serine/threonine-protein kinase 1 OS=Homo sapiens OX=9606 GN=RIPK1 PE=1 SV=3	RIPK1	1	6.96758e-05	92.289	MQS(1)LQLDCVAVPSSR	2	-0.26441	2	0.750795	0.850431	0.845521	1.39956	1.22883	1.06155
hsa04136 Autophagy - other	0.373251	2	1.56	Q99570	853	1.599	Up	0.00602	S	Phosphoinositide 3-kinase regulatory subunit 4 OS=Homo sapiens OX=9606 GN=PIK3R4 PE=1 SV=3	PIK3R4	1	0.0103526	55.011	QDS(1)NVNEEWK	2	0.61309	1	0.714139	0.820982	0.825758	1.41981	1.09981	1.25569
hsa04136 Autophagy - other	0.373251	2	1.56	P60520	10	1.463	Up	0.023264	S	Gamma-aminobutyric acid receptor-associated protein-like 2 OS=Homo sapiens OX=9606 GN=GABARAPL2 PE=1 SV=1	GABARAPL2	1	0.000694321	89.171	EDHS(1)LEHR	3	0.29567	1	0.751445	0.85458	0.882114	1	1.31208	1.32753
hsa03040 Spliceosome	0.000120616	21	2.28	P07910	31	1.428	Up	0.000162293	S	Heterogeneous nuclear ribonucleoproteins C1/C2 OS=Homo sapiens OX=9606 GN=HNRNPC PE=1 SV=4	HNRNPC	0.994735	0.00010388	95.197	KS(0.995)DVEAIFS(0.005)K	3	-0.11706	1	0.825121	0.808151	0.849949	1.21523	1.19882	1.13281
hsa03040 Spliceosome	0.000120616	21	2.28	Q13247	265	1.463	Up	0.02178	S	Serine/arginine-rich splicing factor 6 OS=Homo sapiens OX=9606 GN=SRSF6 PE=1 SV=2	SRSF6	0.989358	0.00075015	75.088	S(0.008)RS(0.989)KDEY(0.003)EK	3	-1.0533	2	0.954304	0.804025	0.715328	1.05819	1.2762	1.28504
hsa03040 Spliceosome	0.000120616	21	2.28	Q13247	122	1.383	Up	0.0122776	S	Serine/arginine-rich splicing factor 6 OS=Homo sapiens OX=9606 GN=SRSF6 PE=1 SV=2	SRSF6	1	0.00511528	69.672	CS(1)WQDLK	2	0.35558	1	0.861849	0.871822	0.82586	1.33235	1.03918	1.16856
hsa03040 Spliceosome	0.000120616	21	2.28	Q07955	244	1.537	Up	0.0069441	S	Serine/arginine-rich splicing factor 1 OS=Homo sapiens OX=9606 GN=SRSF1 PE=1 SV=2	SRSF1	0.999924	0.0128483	44.598	Y(0.119)S(0.883)PRHS(0.998)RS(1)R	2	-0.53005	1	0.774226	0.811881	0.809909	1.23854	1.05152	1.39261
hsa03040 Spliceosome	0.000120616	21	2.28	Q07955	225	2.163	Up	0.0064837	S	Serine/arginine-rich splicing factor 1 OS=Homo sapiens OX=9606 GN=SRSF1 PE=1 SV=2	SRSF1	0.976217	0.0394378	54.486	S(0.012)RS(0.976)Y(0.293)S(0.718)PR	2	0.34549	1	0.687313	0.684158	0.569262	1.39792	1.37778	1.42274
hsa03040 Spliceosome	0.000120616	21	2.28	Q07955	242	1.255	Up	0.0161615	S	Serine/arginine-rich splicing factor 1 OS=Homo sapiens OX=9606 GN=SRSF1 PE=1 SV=2	SRSF1	1	0.00820291	80.245	Y(0.002)S(0.998)PRHS(1)R	2	0.30417	3	0.988012	0.877228	0.830131	1.15833	1.15455	1.07094
hsa03040 Spliceosome	0.000120616	21	2.28	Q01130	221	1.307	Up	0.037441	S	Serine/arginine-rich splicing factor 2 OS=Homo sapiens OX=9606 GN=SRSF2 PE=1 SV=4	SRSF2	0.838082	1.24586e-10	136.34	S(0.402)KS(0.597)PPKSPEEEGAVS(0.162)S(0.838)	3	0.82607	5	0.723964	0.933182	0.93007	1.18999	1.07414	1.11674
hsa03040 Spliceosome	0.000120616	21	2.28	Q01130	189	1.467	Up	0.00099751	S	Serine/arginine-rich splicing factor 2 OS=Homo sapiens OX=9606 GN=SRSF2 PE=1 SV=4	SRSF2	0.9998	0.000422351	72.583	S(1)RS(1)PPPVSK	3	-0.20792	6	0.751264	0.819932	0.842657	1.24652	1.15269	1.14118
hsa03040 Spliceosome	0.000120616	21	2.28	Q01130	191	1.55	Up	0.00097626	S	Serine/arginine-rich splicing factor 2 OS=Homo sapiens OX=9606 GN=SRSF2 PE=1 SV=4	SRSF2	0.99986	0.000422351	76.24	S(1)RS(1)PPPVSK	3	-0.20792	9	0.710819	0.80521	0.814685	1.25487	1.2083	1.14842
hsa03040 Spliceosome	0.000120616	21	2.28	Q01130	212	1.347	Up	0.0041551	S	Serine/arginine-rich splicing factor 2 OS=Homo sapiens OX=9606 GN=SRSF2 PE=1 SV=4	SRSF2	0.964854	4.75892e-07	116.74	S(0.72)KS(0.315)PPKS(0.965)PEEEGAVSS	3	-0.35778	2	0.782609	0.89128	0.867133	1.19462	1.15357	1.0733
hsa03040 Spliceosome	0.000120616	21	2.28	Q01130	206	1.217	Up	0.018195	S	Serine/arginine-rich splicing factor 2 OS=Homo sapiens OX=9606 GN=SRSF2 PE=1 SV=4	SRSF2	0.959152	6.09525e-16	157.63	S(0.959)KS(0.924)PPKS(0.116)PEEEGAVS(0.26)S(0.74)	3	-0.23452	5	0.81092	0.942242	0.941725	1.09917	1.11386	1.06697
hsa03040 Spliceosome	0.000120616	21	2.28	Q01130	208	1.797	Up	7.6507e-05	S	Serine/arginine-rich splicing factor 2 OS=Homo sapiens OX=9606 GN=SRSF2 PE=1 SV=4	SRSF2	0.993368	6.09525e-16	166.38	S(0.006)KS(0.993)PPKSPEEEGAVSS	2	-0.35453	7	0.661274	0.727067	0.726107	1.26784	1.23301	1.29955
hsa03040 Spliceosome	0.000120616	21	2.28	P38159	88	1.233	Up	0.000138931	S	RNA-binding motif protein, X chromosome OS=Homo sapiens OX=9606 GN=RBMX PE=1 SV=3	RBMX	0.987337	2.02333e-07	123.63	VEQAT(0.013)KPS(0.987)FESGR	3	-0.35139	3	0.89548	0.885742	0.913174	1.08248	1.11546	1.12449
hsa03040 Spliceosome	0.000120616	21	2.28	P38159	58	1.284	Up	0.00110107	S	RNA-binding motif protein, X chromosome OS=Homo sapiens OX=9606 GN=RBMX PE=1 SV=3	RBMX	0.999999	8.75966e-22	190.24	GFAFVTFES(1)PADAK	3	-0.67671	2	0.841808	0.883789	0.912176	1.12933	1.09237	1.16461
hsa03040 Spliceosome	0.000120616	21	2.28	O43395	172	1.4	Up	0.0088233	T	U4/U6 small nuclear ribonucleoprotein Prp3 OS=Homo sapiens OX=9606 GN=PRPF3 PE=1 SV=2	PRPF3	0.998829	0.00811136	63.426	T(0.999)PS(0.001)SSQPER	2	-1.1161	1	0.756592	0.937378	0.827519	1.09706	1.21186	1.22122
hsa03040 Spliceosome	0.000120616	21	2.28	Q8IWX8	806	1.588	Up	0.0021359	S	Calcium homeostasis endoplasmic reticulum protein OS=Homo sapiens OX=9606 GN=CHERP PE=1 SV=3	CHERP	0.999753	0.0138827	55.112	SYS(1)PGRR	3	-0.53025	2	0.838843	0.752976	0.73873	1.18156	1.36436	1.15529
hsa03040 Spliceosome	0.000120616	21	2.28	Q14562	230	1.353	Up	0.0024355	S	ATP-dependent RNA helicase DHX8 OS=Homo sapiens OX=9606 GN=DHX8 PE=1 SV=1	DHX8	0.776023	0.013803	46.796	S(0.224)QS(0.776)PPKDR	3	-0.02182	1	0.867647	0.906	0.798597	1.20984	1.16	1.11055
hsa03040 Spliceosome	0.000120616	21	2.28	Q9UKV3	729	1.451	Up	0.000100134	S	Apoptotic chromatin condensation inducer in the nucleus OS=Homo sapiens OX=9606 GN=ACIN1 PE=1 SV=2	ACIN1	1	6.84502e-16	131.86	LQPERGS(1)PK	3	0.35558	3	0.845581	0.853682	0.802927	1.20508	1.18277	1.24339
hsa03040 Spliceosome	0.000120616	21	2.28	O75400	938	1.218	Up	0.00157942	S	Pre-mRNA-processing factor 40 homolog A OS=Homo sapiens OX=9606 GN=PRPF40A PE=1 SV=2	PRPF40A	0.999999	9.95578e-16	164.46	DS(0.001)GNWDT(0.999)S(1)GS(1)ELS(1)EGELEKR	3	0.32143	3	0.88563	0.902057	0.919924	1.14995	1.06415	1.08444
hsa03040 Spliceosome	0.000120616	21	2.28	O75400	858	1.299	Up	0.00076371	S	Pre-mRNA-processing factor 40 homolog A OS=Homo sapiens OX=9606 GN=PRPF40A PE=1 SV=2	PRPF40A	0.838406	1.61262e-11	144.73	SASEHS(0.13)S(0.838)S(0.028)AES(0.003)ER	2	-0.41031	2	0.889541	0.859941	0.869399	1.08004	1.1833	1.13733
hsa03040 Spliceosome	0.000120616	21	2.28	P61978	379	1.617	Up	4.3805e-05	S	Heterogeneous nuclear ribonucleoprotein K OS=Homo sapiens OX=9606 GN=HNRNPK PE=1 SV=1	HNRNPK	1	2.78907e-67	268.75	GS(1)YGDLGGPIITTQVTIPK	2	-1.4512	3	0.770813	0.783203	0.777186	1.28372	1.29141	1.19412
hsa03040 Spliceosome	0.000120616	21	2.28	P84103	148	1.568	Up	0.00118151	S	Serine/arginine-rich splicing factor 3 OS=Homo sapiens OX=9606 GN=SRSF3 PE=1 SV=1	SRSF3	0.996778	0.0243829	40.941	NHKPS(0.997)RS(0.973)FS(0.03)R	3	0.18035	1	0.717112	0.791751	0.853319	1.2775	1.1858	1.23992
hsa03040 Spliceosome	0.000120616	21	2.28	P84103	150	1.568	Up	0.00118151	S	Serine/arginine-rich splicing factor 3 OS=Homo sapiens OX=9606 GN=SRSF3 PE=1 SV=1	SRSF3	0.97314	0.0243829	40.941	NHKPS(0.997)RS(0.973)FS(0.03)R	3	0.18035	1	0.717112	0.791751	0.853319	1.2775	1.1858	1.23992
hsa03040 Spliceosome	0.000120616	21	2.28	Q13595	260	1.217	Up	0.017264	S	Transformer-2 protein homolog alpha OS=Homo sapiens OX=9606 GN=TRA2A PE=1 SV=1	TRA2A	0.999995	2.62336e-05	109.79	RS(1)PS(1)PYYSR	3	-0.21131	22	0.831146	0.964503	0.919496	1.13838	1.04858	1.11668
hsa03040 Spliceosome	0.000120616	21	2.28	Q13595	16	1.661	Up	0.0110803	S	Transformer-2 protein homolog alpha OS=Homo sapiens OX=9606 GN=TRA2A PE=1 SV=1	TRA2A	0.994411	2.07164e-05	88.385	S(0.994)QS(0.017)KS(0.932)PT(0.041)GT(0.016)PAR	3	0.16663	2	0.810149	0.729209	0.763337	1.5427	1.20951	1.07267
hsa03040 Spliceosome	0.000120616	21	2.28	Q13595	100	1.265	Up	0.0035799	S	Transformer-2 protein homolog alpha OS=Homo sapiens OX=9606 GN=TRA2A PE=1 SV=1	TRA2A	0.998683	9.00008e-07	141.25	S(0.001)HS(0.999)PMSNR	2	-0.48593	19	0.863517	0.948276	0.848691	1.15459	1.12348	1.08802
hsa03040 Spliceosome	0.000120616	21	2.28	Q13595	20	1.658	Up	0.0082396	S	Transformer-2 protein homolog alpha OS=Homo sapiens OX=9606 GN=TRA2A PE=1 SV=1	TRA2A	0.991759	2.07164e-05	98.572	S(0.992)PT(0.007)GT(0.001)PAR	2	-0.068586	5	0.694663	0.810345	0.798254	1.47784	1.26113	1.08086
hsa03040 Spliceosome	0.000120616	21	2.28	Q16629	221	1.448	Up	0.0087644	S	Serine/arginine-rich splicing factor 7 OS=Homo sapiens OX=9606 GN=SRSF7 PE=1 SV=1	SRSF7	0.995765	0.0113031	46.318	RS(0.996)RS(0.985)PS(0.018)GS(0.002)PR	3	0.47115	2	0.840467	0.893814	0.735234	1.31124	1.16393	1.0999
hsa03040 Spliceosome	0.000120616	21	2.28	Q16629	194	1.285	Up	0.0109956	S	Serine/arginine-rich splicing factor 7 OS=Homo sapiens OX=9606 GN=SRSF7 PE=1 SV=1	SRSF7	0.998158	0.00908409	50.324	YFQS(0.002)PS(0.998)R	2	0.70005	3	0.827821	0.920619	0.892057	1.22671	1.11885	1.04701
hsa03040 Spliceosome	0.000120616	21	2.28	Q16629	198	1.314	Up	0.0049649	S	Serine/arginine-rich splicing factor 7 OS=Homo sapiens OX=9606 GN=SRSF7 PE=1 SV=1	SRSF7	0.997808	0.00312429	61.821	YFQS(0.533)PS(0.523)RS(0.946)RS(0.998)R	2	-0.54895	2	0.843385	0.902062	0.862525	1.24496	1.09631	1.08521
hsa03040 Spliceosome	0.000120616	21	2.28	Q16629	192	1.472	Up	0.0002009	S	Serine/arginine-rich splicing factor 7 OS=Homo sapiens OX=9606 GN=SRSF7 PE=1 SV=1	SRSF7	0.974688	0.00232954	88.181	YFQS(0.975)PS(0.025)R	2	0.33598	3	0.842412	0.810309	0.792261	1.24784	1.14959	1.20176
hsa03040 Spliceosome	0.000120616	21	2.28	Q16629	208	1.506	Up	0.021676	S	Serine/arginine-rich splicing factor 7 OS=Homo sapiens OX=9606 GN=SRSF7 PE=1 SV=1	SRSF7	0.996681	0.0305246	41.621	S(0.002)IS(0.002)RPRS(0.997)S(0.999)R	2	-0.33132	1	0.81323	0.753608	0.856415	1.15082	1.46516	1.03428
hsa03040 Spliceosome	0.000120616	21	2.28	Q16629	209	1.506	Up	0.021676	S	Serine/arginine-rich splicing factor 7 OS=Homo sapiens OX=9606 GN=SRSF7 PE=1 SV=1	SRSF7	0.998657	0.0305246	41.621	S(0.002)IS(0.002)RPRS(0.997)S(0.999)R	2	-0.33132	1	0.81323	0.753608	0.856415	1.15082	1.46516	1.03428
hsa03040 Spliceosome	0.000120616	21	2.28	Q16629	196	1.314	Up	0.0049649	S	Serine/arginine-rich splicing factor 7 OS=Homo sapiens OX=9606 GN=SRSF7 PE=1 SV=1	SRSF7	0.946291	0.00312429	61.821	YFQS(0.533)PS(0.523)RS(0.946)RS(0.998)R	2	-0.54895	2	0.843385	0.902062	0.862525	1.24496	1.09631	1.08521
hsa03040 Spliceosome	0.000120616	21	2.28	Q16629	223	1.532	Up	0.0059397	S	Serine/arginine-rich splicing factor 7 OS=Homo sapiens OX=9606 GN=SRSF7 PE=1 SV=1	SRSF7	0.984515	0.0113031	46.318	RS(0.996)RS(0.985)PS(0.018)GS(0.002)PR	3	0.47115	2	0.783074	0.826804	0.780041	1.41402	1.12398	1.12341
hsa03040 Spliceosome	0.000120616	21	2.28	Q13435	861	1.218	Up	0.0088178	S	Splicing factor 3B subunit 2 OS=Homo sapiens OX=9606 GN=SF3B2 PE=1 SV=2	SF3B2	1	2.22106e-05	90.907	EQQAQVEKEDFS(1)DMVAEHAAK	4	-0.14464	1	0.835407	0.930528	0.95468	1.11373	1.11111	1.08774
hsa03040 Spliceosome	0.000120616	21	2.28	Q13435	780	1.321	Up	0.0189154	T	Splicing factor 3B subunit 2 OS=Homo sapiens OX=9606 GN=SF3B2 PE=1 SV=2	SF3B2	0.995164	5.67991e-12	152.88	IEEAMDGS(0.005)ET(0.995)PQLFTVLPEK	4	-0.53461	7	0.866986	0.873777	0.86798	1.07787	1.23061	1.13659
hsa03040 Spliceosome	0.000120616	21	2.28	Q99459	424	1.219	Up	0.0172224	T	Cell division cycle 5-like protein OS=Homo sapiens OX=9606 GN=CDC5L PE=1 SV=2	CDC5L	0.999997	1.75897e-05	106.93	TPSNGAEGLT(1)PR	3	0.52471	6	0.877855	0.90251	0.957958	1.1846	1.13125	1.02337
hsa03040 Spliceosome	0.000120616	21	2.28	P52272	481	1.46	Up	0.0055358	S	Heterogeneous nuclear ribonucleoprotein M OS=Homo sapiens OX=9606 GN=HNRNPM PE=1 SV=3	HNRNPM	1	0.00974548	62.201	IGS(1)GVER	2	0.42777	1	0.843625	0.759278	0.862588	1.25911	1.27291	1.06746
hsa03040 Spliceosome	0.000120616	21	2.28	P52272	665	1.368	Up	0.0079159	T	Heterogeneous nuclear ribonucleoprotein M OS=Homo sapiens OX=9606 GN=HNRNPM PE=1 SV=3	HNRNPM	1	0.000762079	83.182	NLPFDFT(1)WK	3	-0.22512	2	0.760956	0.913741	0.875627	1.19212	1.20645	1.08929
hsa03040 Spliceosome	0.000120616	21	2.28	P52298	13	1.27	Up	0.00160108	S	Nuclear cap-binding protein subunit 2 OS=Homo sapiens OX=9606 GN=NCBP2 PE=1 SV=1	NCBP2	0.988003	2.95516e-05	97.203	S(0.01)DS(0.988)YVELS(0.002)QYR	2	0.77324	1	0.872984	0.909953	0.896353	1.20021	1.09753	1.10419
hsa03040 Spliceosome	0.000120616	21	2.28	Q13243	233	1.321	Up	0.00073915	S	Serine/arginine-rich splicing factor 5 OS=Homo sapiens OX=9606 GN=SRSF5 PE=1 SV=1	SRSF5	0.998448	0.00934588	51.726	S(0.103)VS(0.899)RS(0.998)PVPEK	2	1.6535	2	0.901829	0.85446	0.860534	1.20374	1.14706	1.10583
hsa03040 Spliceosome	0.000120616	21	2.28	O75533	142	1.23	Up	0.00081907	T	Splicing factor 3B subunit 1 OS=Homo sapiens OX=9606 GN=SF3B1 PE=1 SV=3	SF3B1	1	1.49885e-07	124.25	LDPFADGGKT(1)PDPK	3	0.31968	4	0.886756	0.932473	0.880359	1.07906	1.10898	1.13221
hsa03040 Spliceosome	0.000120616	21	2.28	O94906	143	1.407	Up	0.0065649	S	Pre-mRNA-processing factor 6 OS=Homo sapiens OX=9606 GN=PRPF6 PE=1 SV=1	PRPF6	1	0.0216444	44.511	IQQQFS(1)DLKR	3	0.99386	1	0.772912	0.800199	0.949633	1.15763	1.16227	1.22876
hsa03020 RNA polymerase	0.561346	1	1.3	Q3B726	328	1.202	Up	0.022584	S	DNA-directed RNA polymerase I subunit RPA43 OS=Homo sapiens OX=9606 GN=TWISTNB PE=1 SV=1	TWISTNB	0.999993	1.7315e-07	125.03	HSEEAEFT(1)PPLKCS(1)PK	4	-0.6022	5	0.956044	0.829686	0.963892	1.13462	1.10166	1.06928
hsa04114 Oocyte meiosis	0.351891	7	1.21	Q12834	59	1.359	Up	0.0001152	T	Cell division cycle protein 20 homolog OS=Homo sapiens OX=9606 GN=CDC20 PE=1 SV=2	CDC20	0.998818	0.0182197	47.894	T(0.001)PGRT(0.999)PGK	3	0.14876	2	0.844011	0.888458	0.845513	1.17898	1.18238	1.14159
hsa04114 Oocyte meiosis	0.351891	7	1.21	Q12834	106	1.423	Up	0.0118045	T	Cell division cycle protein 20 homolog OS=Homo sapiens OX=9606 GN=CDC20 PE=1 SV=2	CDC20	0.958264	3.66038e-08	124.5	ENQPENS(0.003)QT(0.958)PT(0.039)KK	4	0.31123	3	0.847725	0.85257	0.814986	1.07076	1.12746	1.38164
hsa04114 Oocyte meiosis	0.351891	7	1.21	Q12834	70	1.386	Up	0.007641	T	Cell division cycle protein 20 homolog OS=Homo sapiens OX=9606 GN=CDC20 PE=1 SV=2	CDC20	0.891078	2.53554e-11	153.2	VQT(0.105)T(0.891)PS(0.004)KPGGDR	2	0.20885	3	0.866295	0.916586	0.767808	1.14152	1.12021	1.27434
hsa04114 Oocyte meiosis	0.351891	7	1.21	Q12834	41	1.445	Up	0.0044796	S	Cell division cycle protein 20 homolog OS=Homo sapiens OX=9606 GN=CDC20 PE=1 SV=2	CDC20	1	0.000282221	82.663	EAAGPAPS(1)PMR	2	0.08506	1	0.910864	0.798254	0.790009	1.18106	1.12332	1.30642
hsa04114 Oocyte meiosis	0.351891	7	1.21	P63208	131	1.367	Up	0.00020489	T	S-phase kinase-associated protein 1 OS=Homo sapiens OX=9606 GN=SKP1 PE=1 SV=2	SKP1	1	0.00750675	61.344	GKT(1)PEEIRK	4	0.0066299	4	0.869648	0.863501	0.813084	1.14462	1.14822	1.18687
hsa04114 Oocyte meiosis	0.351891	7	1.21	Q13257	195	1.369	Up	0.004359	S	Mitotic spindle assembly checkpoint protein MAD2A OS=Homo sapiens OX=9606 GN=MAD2L1 PE=1 SV=1	MAD2L1	0.99912	0.00178722	81.709	VNS(0.999)MVAY(0.001)K	2	-1.5956	4	0.814151	0.871531	0.851961	1.19283	1.2333	1.04758
hsa04114 Oocyte meiosis	0.351891	7	1.21	P0DP25	102	1.304	Up	0.00041989	S	Calmodulin-3 OS=Homo sapiens OX=9606 GN=CALM3 PE=1 SV=1	CALM3	1	0.000220671	86.987	VFDKDGNGYIS(1)AAELR	3	0.004572	1	0.860182	0.856137	0.893194	1.17683	1.09606	1.12946
hsa04114 Oocyte meiosis	0.351891	7	1.21	Q15418	687	1.479	Up	0.0068244	S	Ribosomal protein S6 kinase alpha-1 OS=Homo sapiens OX=9606 GN=RPS6KA1 PE=1 SV=2	RPS6KA1	0.983875	1.52732e-05	105.51	DKLPQS(0.016)QLS(0.984)HQDLQLVK	4	-0.28314	1	0.866178	0.771154	0.807586	1.04921	1.26688	1.30104
hsa04114 Oocyte meiosis	0.351891	7	1.21	Q9H2G2	779	1.699	Up	5.5587e-05	S	STE20-like serine/threonine-protein kinase OS=Homo sapiens OX=9606 GN=SLK PE=1 SV=1	SLK	0.988516	5.64728e-07	121.18	DS(0.001)GS(0.989)IS(0.01)LQETR	2	0.58598	2	0.773101	0.742498	0.772455	1.23615	1.30171	1.34964
hsa04114 Oocyte meiosis	0.351891	7	1.21	Q14683	360	1.385	Up	0.0028604	S	Structural maintenance of chromosomes protein 1A OS=Homo sapiens OX=9606 GN=SMC1A PE=1 SV=2	SMC1A	0.999872	1.79751e-05	108.23	MEEESQS(1)QGR	2	-0.0034966	1	0.806829	0.908915	0.836557	1.24517	1.18711	1.10251
hsa04114 Oocyte meiosis	0.351891	7	1.21	Q14683	957	1.211	Up	0.032977	S	Structural maintenance of chromosomes protein 1A OS=Homo sapiens OX=9606 GN=SMC1A PE=1 SV=2	SMC1A	0.920279	5.14707e-17	172.06	GTMDDISQEEGS(0.08)S(0.92)QGEDSVSGSQR	3	-0.16689	2	0.958049	0.870155	0.912959	1.00407	1.11227	1.20293
hsa05120 Epithelial cell signaling in Helicobacter pylori infection	0.447309	3	1.23	Q16539	180	2.17	Up	0.00035653	T	Mitogen-activated protein kinase 14 OS=Homo sapiens OX=9606 GN=MAPK14 PE=1 SV=3	MAPK14	0.999883	0.000118317	84.508	HTDDEMT(1)GY(0.998)VAT(0.002)R	3	0.46926	1	0.71334	0.660397	0.573296	1.46596	1.41754	1.34139
hsa05120 Epithelial cell signaling in Helicobacter pylori infection	0.447309	3	1.23	Q16539	182	2.252	Up	3.8544e-05	Y	Mitogen-activated protein kinase 14 OS=Homo sapiens OX=9606 GN=MAPK14 PE=1 SV=3	MAPK14	0.998479	6.03326e-22	194.65	HTDDEMT(0.002)GY(0.998)VATR	2	0.15731	7	0.603595	0.666667	0.628385	1.48511	1.44154	1.34816
hsa05120 Epithelial cell signaling in Helicobacter pylori infection	0.447309	3	1.23	P38606	384	1.207	Up	0.0072382	S	V-type proton ATPase catalytic subunit A OS=Homo sapiens OX=9606 GN=ATP6V1A PE=1 SV=2	ATP6V1A	0.999827	0.0229082	48.091	LAS(1)FYER	2	-0.11556	1	0.972755	0.890411	0.889642	1.06165	1.11256	1.14769
hsa05120 Epithelial cell signaling in Helicobacter pylori infection	0.447309	3	1.23	Q15904	465	1.508	Up	0.02214	S	V-type proton ATPase subunit S1 OS=Homo sapiens OX=9606 GN=ATP6AP1 PE=1 SV=2	ATP6AP1	0.905009	0.00787348	58.172	GPT(0.056)IS(0.905)LT(0.039)QIV	2	-0.28731	1	0.829135	0.661563	0.976657	1.19661	1.21403	1.30917
hsa04721 Synaptic vesicle cycle	0.666991	1	0.98	P38606	384	1.207	Up	0.0072382	S	V-type proton ATPase catalytic subunit A OS=Homo sapiens OX=9606 GN=ATP6V1A PE=1 SV=2	ATP6V1A	0.999827	0.0229082	48.091	LAS(1)FYER	2	-0.11556	1	0.972755	0.890411	0.889642	1.06165	1.11256	1.14769
hsa05211 Renal cell carcinoma	0.833819	2	0.65	P14921	26	1.554	Up	0.00063842	S	Protein C-ets-1 OS=Homo sapiens OX=9606 GN=ETS1 PE=1 SV=1	ETS1	0.999999	6.73664e-06	88.394	VDLELFPS(1)PDMECADVPLLTPSSK	3	-2.0065	3	0.819085	0.801205	0.74514	1.3102	1.20058	1.16435
hsa05211 Renal cell carcinoma	0.833819	2	0.65	Q13905	281	1.382	Up	0.0069764	S	Rap guanine nucleotide exchange factor 1 OS=Homo sapiens OX=9606 GN=RAPGEF1 PE=1 SV=3	RAPGEF1	1	2.3897e-05	89.311	VVDNS(1)PPPALPPK	3	-0.042345	1	0.796082	0.915334	0.862355	1.24175	1.07306	1.24134
hsa05211 Renal cell carcinoma	0.833819	2	0.65	Q13905	360	1.27	Up	0.020205	S	Rap guanine nucleotide exchange factor 1 OS=Homo sapiens OX=9606 GN=RAPGEF1 PE=1 SV=3	RAPGEF1	0.996786	0.000871883	81.016	LS(0.003)KS(0.997)DEQLSSLDR	2	-1.5705	1	0.817453	0.998119	0.864013	1.16863	1.07743	1.15704
hsa05211 Renal cell carcinoma	0.833819	2	0.65	Q13905	296	1.258	Up	0.035037	S	Rap guanine nucleotide exchange factor 1 OS=Homo sapiens OX=9606 GN=RAPGEF1 PE=1 SV=3	RAPGEF1	0.844786	0.010805	57.203	QS(0.002)APS(0.845)PT(0.153)R	2	0.60459	1	0.979519	0.914393	0.806799	1.19104	1.02944	1.17667
hsa05110 Vibrio cholerae infection	0.552512	2	1.12	P38606	384	1.207	Up	0.0072382	S	V-type proton ATPase catalytic subunit A OS=Homo sapiens OX=9606 GN=ATP6V1A PE=1 SV=2	ATP6V1A	0.999827	0.0229082	48.091	LAS(1)FYER	2	-0.11556	1	0.972755	0.890411	0.889642	1.06165	1.11256	1.14769
hsa05110 Vibrio cholerae infection	0.552512	2	1.12	Q15904	465	1.508	Up	0.02214	S	V-type proton ATPase subunit S1 OS=Homo sapiens OX=9606 GN=ATP6AP1 PE=1 SV=2	ATP6AP1	0.905009	0.00787348	58.172	GPT(0.056)IS(0.905)LT(0.039)QIV	2	-0.28731	1	0.829135	0.661563	0.976657	1.19661	1.21403	1.30917
hsa04371 Apelin signaling pathway	0.36438	5	1.26	P0DP25	102	1.304	Up	0.00041989	S	Calmodulin-3 OS=Homo sapiens OX=9606 GN=CALM3 PE=1 SV=1	CALM3	1	0.000220671	86.987	VFDKDGNGYIS(1)AAELR	3	0.004572	1	0.860182	0.856137	0.893194	1.17683	1.09606	1.12946
hsa04371 Apelin signaling pathway	0.36438	5	1.26	Q99570	853	1.599	Up	0.00602	S	Phosphoinositide 3-kinase regulatory subunit 4 OS=Homo sapiens OX=9606 GN=PIK3R4 PE=1 SV=3	PIK3R4	1	0.0103526	55.011	QDS(1)NVNEEWK	2	0.61309	1	0.714139	0.820982	0.825758	1.41981	1.09981	1.25569
hsa04371 Apelin signaling pathway	0.36438	5	1.26	Q13131	524	1.223	Up	0.041024	S	5'-AMP-activated protein kinase catalytic subunit alpha-1 OS=Homo sapiens OX=9606 GN=PRKAA1 PE=1 SV=4	PRKAA1	0.818051	1.36024e-07	120.05	SSEVS(0.001)LT(0.029)S(0.151)S(0.818)VT(0.007)S(0.991)LDS(0.002)SPVDLTPR	3	0.64002	3	0.820746	0.947162	0.923009	1.20225	1.07925	1.00904
hsa04371 Apelin signaling pathway	0.36438	5	1.26	Q9UBS0	416	2.556	Up	0.00142006	S	Ribosomal protein S6 kinase beta-2 OS=Homo sapiens OX=9606 GN=RPS6KB2 PE=1 SV=2	RPS6KB2	0.994398	0.00771359	64.841	RLNS(0.994)S(0.006)PR	3	-0.54426	1	0.665977	0.612967	0.456459	1.3966	1.58972	1.4494
hsa04371 Apelin signaling pathway	0.36438	5	1.26	P60520	10	1.463	Up	0.023264	S	Gamma-aminobutyric acid receptor-associated protein-like 2 OS=Homo sapiens OX=9606 GN=GABARAPL2 PE=1 SV=1	GABARAPL2	1	0.000694321	89.171	EDHS(1)LEHR	3	0.29567	1	0.751445	0.85458	0.882114	1	1.31208	1.32753
hsa03460 Fanconi anemia pathway	0.140144	5	1.77	P15927	238	1.486	Up	0.0087597	S	Replication protein A 32 kDa subunit OS=Homo sapiens OX=9606 GN=RPA2 PE=1 SV=1	RPA2	0.951327	0.00157633	74.424	HMS(0.951)VS(0.048)SIK	3	-0.12673	1	0.815488	0.819404	0.849462	1.23469	1.05844	1.39783
hsa03460 Fanconi anemia pathway	0.140144	5	1.77	Q13535	1989	1.373	Up	0.0153005	T	Serine/threonine-protein kinase ATR OS=Homo sapiens OX=9606 GN=ATR PE=1 SV=3	ATR	1	4.00762e-07	123	GVELCFPENET(1)PPEGK	4	-0.42988	4	0.954796	0.745545	0.854271	1.24854	1.13439	1.12464
hsa03460 Fanconi anemia pathway	0.140144	5	1.77	Q9NVI1	407	1.251	Up	0.03602	S	Fanconi anemia group I protein OS=Homo sapiens OX=9606 GN=FANCI PE=1 SV=4	FANCI	0.822511	0.00019509	87.216	TIET(0.162)S(0.823)PS(0.015)LSR	2	-1.8262	2	0.942482	0.867865	0.887195	1.27282	1.02002	1.08058
hsa03460 Fanconi anemia pathway	0.140144	5	1.77	Q9BXW9	88	1.29	Up	0.0021444	S	Fanconi anemia group D2 protein OS=Homo sapiens OX=9606 GN=FANCD2 PE=1 SV=2	FANCD2	0.999559	0.00771359	64.841	RHPS(1)YPK	3	-0.14546	2	0.857294	0.85426	0.884347	1.11857	1.04848	1.1804
hsa03460 Fanconi anemia pathway	0.140144	5	1.77	P27694	315	1.282	Up	0.00102158	S	Replication protein A 70 kDa DNA-binding subunit OS=Homo sapiens OX=9606 GN=RPA1 PE=1 SV=2	RPA1	0.814062	0.000116879	85.087	S(0.186)KDS(0.814)LVDIIGICK	3	0.14761	1	0.897824	0.859223	0.911992	1.14528	1.09372	1.18359
hsa03460 Fanconi anemia pathway	0.140144	5	1.77	P27694	38	1.285	Up	0.046263	S	Replication protein A 70 kDa DNA-binding subunit OS=Homo sapiens OX=9606 GN=RPA1 PE=1 SV=2	RPA1	0.992594	0.000665856	77.597	PITT(0.007)GNS(0.993)PPR	2	1.8355	1	0.952696	0.852427	0.868472	1.33298	1.05751	1.04615
hsa04310 Wnt signaling pathway	0.913848	2	0.52	P63208	131	1.367	Up	0.00020489	T	S-phase kinase-associated protein 1 OS=Homo sapiens OX=9606 GN=SKP1 PE=1 SV=2	SKP1	1	0.00750675	61.344	GKT(1)PEEIRK	4	0.0066299	4	0.869648	0.863501	0.813084	1.14462	1.14822	1.18687
hsa04310 Wnt signaling pathway	0.913848	2	0.52	Q9HCK8	2223	1.292	Up	0.043664	S	Chromodomain-helicase-DNA-binding protein 8 OS=Homo sapiens OX=9606 GN=CHD8 PE=1 SV=5	CHD8	0.956	3.43406e-11	141.59	S(0.348)S(0.348)S(0.348)AAS(0.956)MAEEEASAVSTAAAQFTK	3	0.50935	1	0.986982	0.79692	0.9197	1.15392	1.0455	1.2945
hsa05225 Hepatocellular carcinoma	0.978745	2	0.37	Q86U86	39	1.213	Up	0.0088591	S	Protein polybromo-1 OS=Homo sapiens OX=9606 GN=PBRM1 PE=1 SV=1	PBRM1	0.999853	6.56442e-23	182.07	RLS(1)NLPTVDPIAVCHELYNTIR	4	0.95144	3	0.849167	0.930097	0.940284	1.11614	1.13494	1.04719
hsa05225 Hepatocellular carcinoma	0.978745	2	0.37	Q9UBS0	416	2.556	Up	0.00142006	S	Ribosomal protein S6 kinase beta-2 OS=Homo sapiens OX=9606 GN=RPS6KB2 PE=1 SV=2	RPS6KB2	0.994398	0.00771359	64.841	RLNS(0.994)S(0.006)PR	3	-0.54426	1	0.665977	0.612967	0.456459	1.3966	1.58972	1.4494
hsa00620 Pyruvate metabolism	0.173066	2	2.6	P51648	293	2.199	Up	0.024818	S	Fatty aldehyde dehydrogenase OS=Homo sapiens OX=9606 GN=ALDH3A2 PE=1 SV=1	ALDH3A2	1	0.0232812	40.727	ILS(1)LLEGQK	3	-0.47646	1	0.890503	0.609589	0.418217	1.23077	1.32709	1.66071
hsa00620 Pyruvate metabolism	0.173066	2	2.6	P14618	249	1.211	Up	0.035662	S	Pyruvate kinase PKM OS=Homo sapiens OX=9606 GN=PKM PE=1 SV=4	PKM	1	0.00129665	76.357	KAS(1)DVHEVR	4	-0.011322	2	0.89881	0.886026	0.946482	1.07614	1.22467	1.00798
hsa00561 Glycerolipid metabolism	0.222736	2	2.23	P51648	293	2.199	Up	0.024818	S	Fatty aldehyde dehydrogenase OS=Homo sapiens OX=9606 GN=ALDH3A2 PE=1 SV=1	ALDH3A2	1	0.0232812	40.727	ILS(1)LLEGQK	3	-0.47646	1	0.890503	0.609589	0.418217	1.23077	1.32709	1.66071
hsa00561 Glycerolipid metabolism	0.222736	2	2.23	Q96AD5	428	1.258	Up	0.00504	S	Patatin-like phospholipase domain-containing protein 2 OS=Homo sapiens OX=9606 GN=PNPLA2 PE=1 SV=1	PNPLA2	1	4.93846e-11	149.32	NNLS(1)LGDALAKWEECQR	3	-0.060794	7	0.919634	0.904245	0.857834	1.1972	1.11542	1.06052
hsa04660 T cell receptor signaling pathway	0.913668	3	0.57	Q16539	180	2.17	Up	0.00035653	T	Mitogen-activated protein kinase 14 OS=Homo sapiens OX=9606 GN=MAPK14 PE=1 SV=3	MAPK14	0.999883	0.000118317	84.508	HTDDEMT(1)GY(0.998)VAT(0.002)R	3	0.46926	1	0.71334	0.660397	0.573296	1.46596	1.41754	1.34139
hsa04660 T cell receptor signaling pathway	0.913668	3	0.57	Q16539	182	2.252	Up	3.8544e-05	Y	Mitogen-activated protein kinase 14 OS=Homo sapiens OX=9606 GN=MAPK14 PE=1 SV=3	MAPK14	0.998479	6.03326e-22	194.65	HTDDEMT(0.002)GY(0.998)VATR	2	0.15731	7	0.603595	0.666667	0.628385	1.48511	1.44154	1.34816
hsa04660 T cell receptor signaling pathway	0.913668	3	0.57	P43403	106	1.203	Up	0.036162	S	Tyrosine-protein kinase ZAP-70 OS=Homo sapiens OX=9606 GN=ZAP70 PE=1 SV=1	ZAP70	1	0.000234608	67.496	KPCNRPS(1)GLEPQPGVFDCLR	4	0.29141	1	0.872816	0.993097	0.896065	1.15692	1.15456	1.01118
hsa04660 T cell receptor signaling pathway	0.913668	3	0.57	P06239	158	1.297	Up	0.0058213	S	Tyrosine-protein kinase Lck OS=Homo sapiens OX=9606 GN=LCK PE=1 SV=6	LCK	0.899898	0.000522489	77.795	ES(0.021)ES(0.9)T(0.078)AGS(0.001)FSLSVR	2	-0.78547	1	0.796709	0.889423	0.924453	1.15988	1.13996	1.08577
hsa04660 T cell receptor signaling pathway	0.913668	3	0.57	P06239	394	1.225	Up	0.00126248	Y	Tyrosine-protein kinase Lck OS=Homo sapiens OX=9606 GN=LCK PE=1 SV=6	LCK	0.993133	5.27585e-10	153.34	LIEDNEY(0.993)T(0.007)AR	3	0.54142	3	0.893514	0.927885	0.865805	1.0854	1.13083	1.07669
hsa04660 T cell receptor signaling pathway	0.913668	3	0.57	P06239	505	1.276	Up	0.037598	Y	Tyrosine-protein kinase Lck OS=Homo sapiens OX=9606 GN=LCK PE=1 SV=6	LCK	0.999913	6.68754e-17	174.62	SVLEDFFTATEGQY(1)QPQP	2	-0.57314	3	1.00194	0.791346	0.847913	1.19067	1.13996	1.03935
hsa04744 Phototransduction	0.128093	1	7.81	P0DP25	102	1.304	Up	0.00041989	S	Calmodulin-3 OS=Homo sapiens OX=9606 GN=CALM3 PE=1 SV=1	CALM3	1	0.000220671	86.987	VFDKDGNGYIS(1)AAELR	3	0.004572	1	0.860182	0.856137	0.893194	1.17683	1.09606	1.12946
hsa00600 Sphingolipid metabolism	0.496633	1	1.56	Q96G23	348	1.317	Up	0.0076218	S	Ceramide synthase 2 OS=Homo sapiens OX=9606 GN=CERS2 PE=1 SV=1	CERS2	0.985682	2.66028e-24	193.57	SDREET(0.028)ES(0.986)S(0.986)EGEEAAAGGGAK	3	0.24053	3	0.858775	0.851266	0.8917	1.07301	1.08815	1.26612
hsa00600 Sphingolipid metabolism	0.496633	1	1.56	Q96G23	349	1.36	Up	0.0057446	S	Ceramide synthase 2 OS=Homo sapiens OX=9606 GN=CERS2 PE=1 SV=1	CERS2	0.995372	2.66028e-24	193.57	LVEDERS(1)DREET(0.102)ES(0.902)S(0.995)EGEEAAAGGGAK	4	-0.5315	2	0.841121	0.822785	0.8917	1.05268	1.16588	1.25691
hsa00600 Sphingolipid metabolism	0.496633	1	1.56	Q96G23	341	1.31	Up	0.0023167	S	Ceramide synthase 2 OS=Homo sapiens OX=9606 GN=CERS2 PE=1 SV=1	CERS2	0.999999	1.71718e-25	196.15	LVEDERS(1)DREET(0.102)ES(0.902)S(0.995)EGEEAAAGGGAK	4	-0.5315	5	0.849429	0.89557	0.864372	1.11738	1.08152	1.21904
hsa04612 Antigen processing and presentation	0.747303	1	0.78	P27797	195	1.462	Up	0.0035425	S	Calreticulin OS=Homo sapiens OX=9606 GN=CALR PE=1 SV=1	CALR	0.993692	1.82952e-08	129.72	IDNSQVES(0.006)GS(0.994)LEDDWDFLPPKK	4	0.20133	2	0.80226	0.76992	0.902439	1.28173	1.2166	1.11912
hsa05016 Huntington disease	0.90365	2	0.54	P36542	146	1.326	Up	0.00186417	S	ATP synthase subunit gamma, mitochondrial OS=Homo sapiens OX=9606 GN=ATP5F1C PE=1 SV=1	ATP5F1C	0.848104	6.42345e-05	87.083	T(0.152)HS(0.848)DQFLVAFK	3	0.14265	1	0.803016	0.915907	0.860324	1.13105	1.15733	1.13043
hsa05016 Huntington disease	0.90365	2	0.54	P06576	465	2.416	Up	1.69111e-05	S	ATP synthase subunit beta, mitochondrial OS=Homo sapiens OX=9606 GN=ATP5F1B PE=1 SV=3	ATP5F1B	0.999999	5.26017e-05	96.723	FLS(1)QPFQVAEVFTGHMGK	3	0.090395	2	0.623975	0.588008	0.587669	1.38215	1.52314	1.44229
hsa04146 Peroxisome	0.747303	1	0.78	P56589	201	1.331	Up	0.0091424	S	Peroxisomal biogenesis factor 3 OS=Homo sapiens OX=9606 GN=PEX3 PE=1 SV=1	PEX3	0.981416	1.9115e-05	96.866	HS(0.019)LS(0.981)LLDLEQK	3	-0.42295	1	0.919501	0.851297	0.833026	1.04229	1.24213	1.18053
hsa04130 SNARE interactions in vesicular transport	0.467292	2	1.3	O00161	161	1.378	Up	0.0021249	S	Synaptosomal-associated protein 23 OS=Homo sapiens OX=9606 GN=SNAP23 PE=1 SV=1	SNAP23	0.999996	1.01083e-10	144.5	ITNDAREDEMEENLTQVGS(1)ILGNLK	4	-1.1246	6	0.851852	0.876698	0.792564	1.08745	1.16272	1.22312
hsa04130 SNARE interactions in vesicular transport	0.467292	2	1.3	O75396	168	1.826	Up	0.00040315	S	Vesicle-trafficking protein SEC22b OS=Homo sapiens OX=9606 GN=SEC22B PE=1 SV=4	SEC22B	0.999853	2.06729e-08	131.33	GEALSALDS(1)KANNLSSLSK	3	0.16921	3	0.767396	0.675413	0.720408	1.22189	1.31827	1.40965
hsa00230 Purine metabolism	0.308232	4	1.42	Q9Y6X5	439	1.799	Up	0.00138406	S	Bis(5'-adenosyl)-triphosphatase ENPP4 OS=Homo sapiens OX=9606 GN=ENPP4 PE=1 SV=3	ENPP4	0.999963	0.00998178	50.786	LSVPRPFS(1)R	3	-0.17229	1	0.812738	0.659889	0.734615	1.21156	1.39891	1.36059
hsa00230 Purine metabolism	0.308232	4	1.42	P36871	117	1.45	Up	7.5365e-05	S	Phosphoglucomutase-1 OS=Homo sapiens OX=9606 GN=PGM1 PE=1 SV=3	PGM1	0.99941	5.8922e-32	216.64	AIGGIILT(0.001)AS(0.999)HNPGGPNGDFGIK	2	1.0916	12	0.830151	0.863302	0.80746	1.18924	1.2058	1.23173
hsa00230 Purine metabolism	0.308232	4	1.42	Q01433	190	1.368	Up	0.0023363	S	AMP deaminase 2 OS=Homo sapiens OX=9606 GN=AMPD2 PE=1 SV=2	AMPD2	0.960267	7.68528e-23	178.35	T(0.039)DS(0.96)DSDLQLYK	2	0.97929	7	0.899281	0.822491	0.862312	1.09176	1.22065	1.22164
hsa00230 Purine metabolism	0.308232	4	1.42	Q01433	100	1.24	Up	0.0063375	S	AMP deaminase 2 OS=Homo sapiens OX=9606 GN=AMPD2 PE=1 SV=2	AMPD2	1	0.000583948	72.29	S(1)LPGPAPCLK	3	0.18476	2	0.906475	0.861524	0.955779	1.07299	1.12146	1.1821
hsa00230 Purine metabolism	0.308232	4	1.42	P14618	249	1.211	Up	0.035662	S	Pyruvate kinase PKM OS=Homo sapiens OX=9606 GN=PKM PE=1 SV=4	PKM	1	0.00129665	76.357	KAS(1)DVHEVR	4	-0.011322	2	0.89881	0.886026	0.946482	1.07614	1.22467	1.00798
hsa04710 Circadian rhythm	0.373251	2	1.56	P63208	131	1.367	Up	0.00020489	T	S-phase kinase-associated protein 1 OS=Homo sapiens OX=9606 GN=SKP1 PE=1 SV=2	SKP1	1	0.00750675	61.344	GKT(1)PEEIRK	4	0.0066299	4	0.869648	0.863501	0.813084	1.14462	1.14822	1.18687
hsa04710 Circadian rhythm	0.373251	2	1.56	Q13131	524	1.223	Up	0.041024	S	5'-AMP-activated protein kinase catalytic subunit alpha-1 OS=Homo sapiens OX=9606 GN=PRKAA1 PE=1 SV=4	PRKAA1	0.818051	1.36024e-07	120.05	SSEVS(0.001)LT(0.029)S(0.151)S(0.818)VT(0.007)S(0.991)LDS(0.002)SPVDLTPR	3	0.64002	3	0.820746	0.947162	0.923009	1.20225	1.07925	1.00904
hsa04390 Hippo signaling pathway	0.979329	1	0.28	Q14160	1348	1.351	Up	0.035981	S	Protein scribble homolog OS=Homo sapiens OX=9606 GN=SCRIB PE=1 SV=4	SCRIB	0.93406	7.85925e-06	69.462	AFAAVPTSHPPEDAPAQPPT(0.03)PGPAAS(0.934)PEQLS(0.036)FR	4	0.36161	1	1.02405	0.768672	0.853239	1.10073	1.31064	1.16434
hsa04910 Insulin signaling pathway	0.674315	6	0.9	P46020	758	1.592	Up	0.000138859	S	Phosphorylase b kinase regulatory subunit alpha, skeletal muscle isoform OS=Homo sapiens OX=9606 GN=PHKA1 PE=1 SV=2	PHKA1	1	0.000327631	94.717	DQS(1)GEVDFK	2	0.12455	1	0.760167	0.81092	0.762287	1.27316	1.26364	1.17833
hsa04910 Insulin signaling pathway	0.674315	6	0.9	P0DP25	102	1.304	Up	0.00041989	S	Calmodulin-3 OS=Homo sapiens OX=9606 GN=CALM3 PE=1 SV=1	CALM3	1	0.000220671	86.987	VFDKDGNGYIS(1)AAELR	3	0.004572	1	0.860182	0.856137	0.893194	1.17683	1.09606	1.12946
hsa04910 Insulin signaling pathway	0.674315	6	0.9	Q13131	524	1.223	Up	0.041024	S	5'-AMP-activated protein kinase catalytic subunit alpha-1 OS=Homo sapiens OX=9606 GN=PRKAA1 PE=1 SV=4	PRKAA1	0.818051	1.36024e-07	120.05	SSEVS(0.001)LT(0.029)S(0.151)S(0.818)VT(0.007)S(0.991)LDS(0.002)SPVDLTPR	3	0.64002	3	0.820746	0.947162	0.923009	1.20225	1.07925	1.00904
hsa04910 Insulin signaling pathway	0.674315	6	0.9	P13807	727	1.212	Up	0.036422	S	Glycogen [starch] synthase, muscle OS=Homo sapiens OX=9606 GN=GYS1 PE=1 SV=2	GYS1	0.907573	1.31659e-17	158.16	NSVDTATSSSLST(0.001)PS(0.008)EPLS(0.908)PT(0.055)S(0.012)S(0.017)LGEER	3	0.068497	1	0.805301	0.928736	0.980553	1.08566	1.05922	1.14395
hsa04910 Insulin signaling pathway	0.674315	6	0.9	Q13905	281	1.382	Up	0.0069764	S	Rap guanine nucleotide exchange factor 1 OS=Homo sapiens OX=9606 GN=RAPGEF1 PE=1 SV=3	RAPGEF1	1	2.3897e-05	89.311	VVDNS(1)PPPALPPK	3	-0.042345	1	0.796082	0.915334	0.862355	1.24175	1.07306	1.24134
hsa04910 Insulin signaling pathway	0.674315	6	0.9	Q13905	360	1.27	Up	0.020205	S	Rap guanine nucleotide exchange factor 1 OS=Homo sapiens OX=9606 GN=RAPGEF1 PE=1 SV=3	RAPGEF1	0.996786	0.000871883	81.016	LS(0.003)KS(0.997)DEQLSSLDR	2	-1.5705	1	0.817453	0.998119	0.864013	1.16863	1.07743	1.15704
hsa04910 Insulin signaling pathway	0.674315	6	0.9	Q13905	296	1.258	Up	0.035037	S	Rap guanine nucleotide exchange factor 1 OS=Homo sapiens OX=9606 GN=RAPGEF1 PE=1 SV=3	RAPGEF1	0.844786	0.010805	57.203	QS(0.002)APS(0.845)PT(0.153)R	2	0.60459	1	0.979519	0.914393	0.806799	1.19104	1.02944	1.17667
hsa04910 Insulin signaling pathway	0.674315	6	0.9	Q9UBS0	416	2.556	Up	0.00142006	S	Ribosomal protein S6 kinase beta-2 OS=Homo sapiens OX=9606 GN=RPS6KB2 PE=1 SV=2	RPS6KB2	0.994398	0.00771359	64.841	RLNS(0.994)S(0.006)PR	3	-0.54426	1	0.665977	0.612967	0.456459	1.3966	1.58972	1.4494
hsa04510 Focal adhesion	0.807838	4	0.74	P21333	1084	1.334	Up	0.0040447	S	Filamin-A OS=Homo sapiens OX=9606 GN=FLNA PE=1 SV=4	FLNA	0.999915	7.25433e-16	133.92	AFGPGLQGGSAGS(1)PAR	2	-0.31133	3	0.859571	0.874202	0.889823	1.26867	1.07805	1.15385
hsa04510 Focal adhesion	0.807838	4	0.74	P21333	1459	1.357	Up	0.03862	S	Filamin-A OS=Homo sapiens OX=9606 GN=FLNA PE=1 SV=4	FLNA	0.999994	3.24732e-06	107.69	CSGPGLS(1)PGMVR	2	-1.2437	1	0.855993	0.84412	0.907563	1.4136	1.06335	1.06176
hsa04510 Focal adhesion	0.807838	4	0.74	Q13905	281	1.382	Up	0.0069764	S	Rap guanine nucleotide exchange factor 1 OS=Homo sapiens OX=9606 GN=RAPGEF1 PE=1 SV=3	RAPGEF1	1	2.3897e-05	89.311	VVDNS(1)PPPALPPK	3	-0.042345	1	0.796082	0.915334	0.862355	1.24175	1.07306	1.24134
hsa04510 Focal adhesion	0.807838	4	0.74	Q13905	360	1.27	Up	0.020205	S	Rap guanine nucleotide exchange factor 1 OS=Homo sapiens OX=9606 GN=RAPGEF1 PE=1 SV=3	RAPGEF1	0.996786	0.000871883	81.016	LS(0.003)KS(0.997)DEQLSSLDR	2	-1.5705	1	0.817453	0.998119	0.864013	1.16863	1.07743	1.15704
hsa04510 Focal adhesion	0.807838	4	0.74	Q13905	296	1.258	Up	0.035037	S	Rap guanine nucleotide exchange factor 1 OS=Homo sapiens OX=9606 GN=RAPGEF1 PE=1 SV=3	RAPGEF1	0.844786	0.010805	57.203	QS(0.002)APS(0.845)PT(0.153)R	2	0.60459	1	0.979519	0.914393	0.806799	1.19104	1.02944	1.17667
hsa04510 Focal adhesion	0.807838	4	0.74	P19105	18	1.605	Up	0.000183171	T	Myosin regulatory light chain 12A OS=Homo sapiens OX=9606 GN=MYL12A PE=1 SV=2	MYL12A	1	4.14264e-31	198.67	AT(1)S(1)NVFAMFDQSQIQEFK	3	-1.5076	12	0.768317	0.748357	0.82846	1.30126	1.23173	1.22992
hsa04510 Focal adhesion	0.807838	4	0.74	P19105	19	1.359	Up	5.7321e-05	S	Myosin regulatory light chain 12A OS=Homo sapiens OX=9606 GN=MYL12A PE=1 SV=2	MYL12A	1	3.22787e-64	273.37	AT(1)S(1)NVFAMFDQSQIQEFK	3	-1.5076	20	0.858416	0.841315	0.871345	1.16632	1.19102	1.13655
hsa04510 Focal adhesion	0.807838	4	0.74	O14974	871	1.287	Up	0.048356	S	Protein phosphatase 1 regulatory subunit 12A OS=Homo sapiens OX=9606 GN=PPP1R12A PE=1 SV=1	PPP1R12A	0.970474	5.92247e-68	268.3	STGVSFWTQDSDENEQEQQS(0.97)DT(0.029)EEGSNKK	4	-0.88047	1	0.846008	0.805634	0.976407	1.14407	1.12945	1.1093
hsa00500 Starch and sucrose metabolism	0.173066	2	2.6	P13807	727	1.212	Up	0.036422	S	Glycogen [starch] synthase, muscle OS=Homo sapiens OX=9606 GN=GYS1 PE=1 SV=2	GYS1	0.907573	1.31659e-17	158.16	NSVDTATSSSLST(0.001)PS(0.008)EPLS(0.908)PT(0.055)S(0.012)S(0.017)LGEER	3	0.068497	1	0.805301	0.928736	0.980553	1.08566	1.05922	1.14395
hsa00500 Starch and sucrose metabolism	0.173066	2	2.6	P36871	117	1.45	Up	7.5365e-05	S	Phosphoglucomutase-1 OS=Homo sapiens OX=9606 GN=PGM1 PE=1 SV=3	PGM1	0.99941	5.8922e-32	216.64	AIGGIILT(0.001)AS(0.999)HNPGGPNGDFGIK	2	1.0916	12	0.830151	0.863302	0.80746	1.18924	1.2058	1.23173
hsa04713 Circadian entrainment	0.873486	1	0.52	P0DP25	102	1.304	Up	0.00041989	S	Calmodulin-3 OS=Homo sapiens OX=9606 GN=CALM3 PE=1 SV=1	CALM3	1	0.000220671	86.987	VFDKDGNGYIS(1)AAELR	3	0.004572	1	0.860182	0.856137	0.893194	1.17683	1.09606	1.12946
hsa04970 Salivary secretion	0.873486	1	0.52	P0DP25	102	1.304	Up	0.00041989	S	Calmodulin-3 OS=Homo sapiens OX=9606 GN=CALM3 PE=1 SV=1	CALM3	1	0.000220671	86.987	VFDKDGNGYIS(1)AAELR	3	0.004572	1	0.860182	0.856137	0.893194	1.17683	1.09606	1.12946
hsa04110 Cell cycle	0.437037	9	1.1	Q13535	1989	1.373	Up	0.0153005	T	Serine/threonine-protein kinase ATR OS=Homo sapiens OX=9606 GN=ATR PE=1 SV=3	ATR	1	4.00762e-07	123	GVELCFPENET(1)PPEGK	4	-0.42988	4	0.954796	0.745545	0.854271	1.24854	1.13439	1.12464
hsa04110 Cell cycle	0.437037	9	1.1	P28749	964	1.43	Up	0.00127967	S	Retinoblastoma-like protein 1 OS=Homo sapiens OX=9606 GN=RBL1 PE=1 SV=3	RBL1	1	1.049e-07	120.13	YDLANQDHMMDAPPLS(1)PFPHIK	4	-0.86569	1	0.782369	0.834297	0.890748	1.14015	1.23392	1.21064
hsa04110 Cell cycle	0.437037	9	1.1	P33991	23	2.132	Up	0.0034804	T	DNA replication licensing factor MCM4 OS=Homo sapiens OX=9606 GN=MCM4 PE=1 SV=5	MCM4	0.99476	0.00451144	75.509	AT(0.005)PAQT(0.995)PR	2	-0.014991	1	0.802419	0.552192	0.589377	1.51309	1.31207	1.31934
hsa04110 Cell cycle	0.437037	9	1.1	P33991	19	1.39	Up	0.042219	T	DNA replication licensing factor MCM4 OS=Homo sapiens OX=9606 GN=MCM4 PE=1 SV=5	MCM4	0.996616	0.00335351	81.799	AT(0.997)PAQT(0.003)PR	2	0.64858	1	0.747984	0.931106	0.85189	1.3162	1.22571	0.975586
hsa04110 Cell cycle	0.437037	9	1.1	P33991	110	1.378	Up	0.00088143	T	DNA replication licensing factor MCM4 OS=Homo sapiens OX=9606 GN=MCM4 PE=1 SV=5	MCM4	0.996973	0.0167458	46.88	S(0.003)GVRGT(0.997)PVR	3	-0.80143	2	0.897177	0.835073	0.808989	1.13482	1.21099	1.15723
hsa04110 Cell cycle	0.437037	9	1.1	Q14683	360	1.385	Up	0.0028604	S	Structural maintenance of chromosomes protein 1A OS=Homo sapiens OX=9606 GN=SMC1A PE=1 SV=2	SMC1A	0.999872	1.79751e-05	108.23	MEEESQS(1)QGR	2	-0.0034966	1	0.806829	0.908915	0.836557	1.24517	1.18711	1.10251
hsa04110 Cell cycle	0.437037	9	1.1	Q14683	957	1.211	Up	0.032977	S	Structural maintenance of chromosomes protein 1A OS=Homo sapiens OX=9606 GN=SMC1A PE=1 SV=2	SMC1A	0.920279	5.14707e-17	172.06	GTMDDISQEEGS(0.08)S(0.92)QGEDSVSGSQR	3	-0.16689	2	0.958049	0.870155	0.912959	1.00407	1.11227	1.20293
hsa04110 Cell cycle	0.437037	9	1.1	P63208	131	1.367	Up	0.00020489	T	S-phase kinase-associated protein 1 OS=Homo sapiens OX=9606 GN=SKP1 PE=1 SV=2	SKP1	1	0.00750675	61.344	GKT(1)PEEIRK	4	0.0066299	4	0.869648	0.863501	0.813084	1.14462	1.14822	1.18687
hsa04110 Cell cycle	0.437037	9	1.1	Q12834	59	1.359	Up	0.0001152	T	Cell division cycle protein 20 homolog OS=Homo sapiens OX=9606 GN=CDC20 PE=1 SV=2	CDC20	0.998818	0.0182197	47.894	T(0.001)PGRT(0.999)PGK	3	0.14876	2	0.844011	0.888458	0.845513	1.17898	1.18238	1.14159
hsa04110 Cell cycle	0.437037	9	1.1	Q12834	106	1.423	Up	0.0118045	T	Cell division cycle protein 20 homolog OS=Homo sapiens OX=9606 GN=CDC20 PE=1 SV=2	CDC20	0.958264	3.66038e-08	124.5	ENQPENS(0.003)QT(0.958)PT(0.039)KK	4	0.31123	3	0.847725	0.85257	0.814986	1.07076	1.12746	1.38164
hsa04110 Cell cycle	0.437037	9	1.1	Q12834	70	1.386	Up	0.007641	T	Cell division cycle protein 20 homolog OS=Homo sapiens OX=9606 GN=CDC20 PE=1 SV=2	CDC20	0.891078	2.53554e-11	153.2	VQT(0.105)T(0.891)PS(0.004)KPGGDR	2	0.20885	3	0.866295	0.916586	0.767808	1.14152	1.12021	1.27434
hsa04110 Cell cycle	0.437037	9	1.1	Q12834	41	1.445	Up	0.0044796	S	Cell division cycle protein 20 homolog OS=Homo sapiens OX=9606 GN=CDC20 PE=1 SV=2	CDC20	1	0.000282221	82.663	EAAGPAPS(1)PMR	2	0.08506	1	0.910864	0.798254	0.790009	1.18106	1.12332	1.30642
hsa04110 Cell cycle	0.437037	9	1.1	Q8N3U4	1112	1.212	Up	0.0143438	T	Cohesin subunit SA-2 OS=Homo sapiens OX=9606 GN=STAG2 PE=1 SV=3	STAG2	0.9906	9.75548e-11	143.04	EQT(0.009)LHT(0.991)PVMMQTPQLTSTIMR	3	-1.2744	2	0.850746	0.980042	0.900192	1.05668	1.13793	1.11489
hsa04110 Cell cycle	0.437037	9	1.1	O14757	317	1.573	Up	0.0181016	S	Serine/threonine-protein kinase Chk1 OS=Homo sapiens OX=9606 GN=CHEK1 PE=1 SV=2	CHEK1	0.979974	8.86255e-06	127.83	YSS(0.02)S(0.98)QPEPR	2	-0.08267	1	0.664557	0.95122	0.749726	1.28276	1.10736	1.33012
hsa04110 Cell cycle	0.437037	9	1.1	Q13257	195	1.369	Up	0.004359	S	Mitotic spindle assembly checkpoint protein MAD2A OS=Homo sapiens OX=9606 GN=MAD2L1 PE=1 SV=1	MAD2L1	0.99912	0.00178722	81.709	VNS(0.999)MVAY(0.001)K	2	-1.5956	4	0.814151	0.871531	0.851961	1.19283	1.2333	1.04758
hsa05145 Toxoplasmosis	0.889871	1	0.49	Q16539	180	2.17	Up	0.00035653	T	Mitogen-activated protein kinase 14 OS=Homo sapiens OX=9606 GN=MAPK14 PE=1 SV=3	MAPK14	0.999883	0.000118317	84.508	HTDDEMT(1)GY(0.998)VAT(0.002)R	3	0.46926	1	0.71334	0.660397	0.573296	1.46596	1.41754	1.34139
hsa05145 Toxoplasmosis	0.889871	1	0.49	Q16539	182	2.252	Up	3.8544e-05	Y	Mitogen-activated protein kinase 14 OS=Homo sapiens OX=9606 GN=MAPK14 PE=1 SV=3	MAPK14	0.998479	6.03326e-22	194.65	HTDDEMT(0.002)GY(0.998)VATR	2	0.15731	7	0.603595	0.666667	0.628385	1.48511	1.44154	1.34816
hsa04720 Long-term potentiation	0.850672	2	0.62	P0DP25	102	1.304	Up	0.00041989	S	Calmodulin-3 OS=Homo sapiens OX=9606 GN=CALM3 PE=1 SV=1	CALM3	1	0.000220671	86.987	VFDKDGNGYIS(1)AAELR	3	0.004572	1	0.860182	0.856137	0.893194	1.17683	1.09606	1.12946
hsa04720 Long-term potentiation	0.850672	2	0.62	Q15418	687	1.479	Up	0.0068244	S	Ribosomal protein S6 kinase alpha-1 OS=Homo sapiens OX=9606 GN=RPS6KA1 PE=1 SV=2	RPS6KA1	0.983875	1.52732e-05	105.51	DKLPQS(0.016)QLS(0.984)HQDLQLVK	4	-0.28314	1	0.866178	0.771154	0.807586	1.04921	1.26688	1.30104
hsa04623 Cytosolic DNA-sensing pathway	0.747303	1	0.78	Q13546	320	1.508	Up	0.0105427	S	Receptor-interacting serine/threonine-protein kinase 1 OS=Homo sapiens OX=9606 GN=RIPK1 PE=1 SV=3	RIPK1	1	6.96758e-05	92.289	MQS(1)LQLDCVAVPSSR	2	-0.26441	2	0.750795	0.850431	0.845521	1.39956	1.22883	1.06155
hsa01522 Endocrine resistance	0.865964	2	0.6	Q16539	180	2.17	Up	0.00035653	T	Mitogen-activated protein kinase 14 OS=Homo sapiens OX=9606 GN=MAPK14 PE=1 SV=3	MAPK14	0.999883	0.000118317	84.508	HTDDEMT(1)GY(0.998)VAT(0.002)R	3	0.46926	1	0.71334	0.660397	0.573296	1.46596	1.41754	1.34139
hsa01522 Endocrine resistance	0.865964	2	0.6	Q16539	182	2.252	Up	3.8544e-05	Y	Mitogen-activated protein kinase 14 OS=Homo sapiens OX=9606 GN=MAPK14 PE=1 SV=3	MAPK14	0.998479	6.03326e-22	194.65	HTDDEMT(0.002)GY(0.998)VATR	2	0.15731	7	0.603595	0.666667	0.628385	1.48511	1.44154	1.34816
hsa01522 Endocrine resistance	0.865964	2	0.6	Q9UBS0	416	2.556	Up	0.00142006	S	Ribosomal protein S6 kinase beta-2 OS=Homo sapiens OX=9606 GN=RPS6KB2 PE=1 SV=2	RPS6KB2	0.994398	0.00771359	64.841	RLNS(0.994)S(0.006)PR	3	-0.54426	1	0.665977	0.612967	0.456459	1.3966	1.58972	1.4494
hsa04062 Chemokine signaling pathway	0.994935	1	0.21	Q92556	344	1.236	Up	9.71e-05	S	Engulfment and cell motility protein 1 OS=Homo sapiens OX=9606 GN=ELMO1 PE=1 SV=2	ELMO1	0.936893	1.24059e-31	213.81	IAFDAESEPNNS(0.002)S(0.061)GS(0.937)MEK	2	0.52122	5	0.906667	0.884498	0.878074	1.09366	1.11923	1.08527
hsa04150 mTOR signaling pathway	0.703789	5	0.87	P38606	384	1.207	Up	0.0072382	S	V-type proton ATPase catalytic subunit A OS=Homo sapiens OX=9606 GN=ATP6V1A PE=1 SV=2	ATP6V1A	0.999827	0.0229082	48.091	LAS(1)FYER	2	-0.11556	1	0.972755	0.890411	0.889642	1.06165	1.11256	1.14769
hsa04150 mTOR signaling pathway	0.703789	5	0.87	Q6IAA8	27	1.264	Up	0.0069157	S	Ragulator complex protein LAMTOR1 OS=Homo sapiens OX=9606 GN=LAMTOR1 PE=1 SV=2	LAMTOR1	0.991627	3.80201e-05	88.101	LLLDPS(0.008)S(0.992)PPT(0.001)K	3	0.087771	5	0.943114	0.824107	0.923567	1.09802	1.17364	1.13052
hsa04150 mTOR signaling pathway	0.703789	5	0.87	Q6IAA8	63	1.254	Up	0.0173629	S	Ragulator complex protein LAMTOR1 OS=Homo sapiens OX=9606 GN=LAMTOR1 PE=1 SV=2	LAMTOR1	0.828026	1.21544e-23	192.73	T(0.167)AS(0.828)NIIDVS(0.005)AADSQGMEQHEYMDR	3	-0.54437	3	0.89022	0.819643	0.994692	1.12826	1.16527	1.09839
hsa04150 mTOR signaling pathway	0.703789	5	0.87	Q6IAA8	48	2.186	Up	0.00114348	T	Ragulator complex protein LAMTOR1 OS=Homo sapiens OX=9606 GN=LAMTOR1 PE=1 SV=2	LAMTOR1	0.999898	0.000610664	72.583	T(1)DEQALLSSILAK	3	-0.80219	1	0.719561	0.542857	0.686837	1.37643	1.35669	1.52711
hsa04150 mTOR signaling pathway	0.703789	5	0.87	Q13131	524	1.223	Up	0.041024	S	5'-AMP-activated protein kinase catalytic subunit alpha-1 OS=Homo sapiens OX=9606 GN=PRKAA1 PE=1 SV=4	PRKAA1	0.818051	1.36024e-07	120.05	SSEVS(0.001)LT(0.029)S(0.151)S(0.818)VT(0.007)S(0.991)LDS(0.002)SPVDLTPR	3	0.64002	3	0.820746	0.947162	0.923009	1.20225	1.07925	1.00904
hsa04150 mTOR signaling pathway	0.703789	5	0.87	Q9UBS0	416	2.556	Up	0.00142006	S	Ribosomal protein S6 kinase beta-2 OS=Homo sapiens OX=9606 GN=RPS6KB2 PE=1 SV=2	RPS6KB2	0.994398	0.00771359	64.841	RLNS(0.994)S(0.006)PR	3	-0.54426	1	0.665977	0.612967	0.456459	1.3966	1.58972	1.4494
hsa04150 mTOR signaling pathway	0.703789	5	0.87	Q15418	687	1.479	Up	0.0068244	S	Ribosomal protein S6 kinase alpha-1 OS=Homo sapiens OX=9606 GN=RPS6KA1 PE=1 SV=2	RPS6KA1	0.983875	1.52732e-05	105.51	DKLPQS(0.016)QLS(0.984)HQDLQLVK	4	-0.28314	1	0.866178	0.771154	0.807586	1.04921	1.26688	1.30104
hsa05134 Legionellosis	0.190989	3	1.95	P62820	114	1.353	Up	0.0042435	S	Ras-related protein Rab-1A OS=Homo sapiens OX=9606 GN=RAB1A PE=1 SV=3	RAB1A	0.995748	0.0097908	58.476	Y(0.004)AS(0.996)ENVNK	2	-0.0613	1	0.886233	0.830946	0.842424	1.15434	1.149	1.16066
hsa05134 Legionellosis	0.190989	3	1.95	O75396	168	1.826	Up	0.00040315	S	Vesicle-trafficking protein SEC22b OS=Homo sapiens OX=9606 GN=SEC22B PE=1 SV=4	SEC22B	0.999853	2.06729e-08	131.33	GEALSALDS(1)KANNLSSLSK	3	0.16921	3	0.767396	0.675413	0.720408	1.22189	1.31827	1.40965
hsa05134 Legionellosis	0.190989	3	1.95	Q00613	121	1.68	Up	0.023221	S	Heat shock factor protein 1 OS=Homo sapiens OX=9606 GN=HSF1 PE=1 SV=1	HSF1	0.809561	0.0018251	68.676	KVT(0.188)S(0.81)VS(0.002)TLK	3	0.0075834	1	0.826479	0.647619	0.816777	1.07814	1.17652	1.59459
hsa04115 p53 signaling pathway	0.447309	3	1.23	Q13535	1989	1.373	Up	0.0153005	T	Serine/threonine-protein kinase ATR OS=Homo sapiens OX=9606 GN=ATR PE=1 SV=3	ATR	1	4.00762e-07	123	GVELCFPENET(1)PPEGK	4	-0.42988	4	0.954796	0.745545	0.854271	1.24854	1.13439	1.12464
hsa04115 p53 signaling pathway	0.447309	3	1.23	O14757	317	1.573	Up	0.0181016	S	Serine/threonine-protein kinase Chk1 OS=Homo sapiens OX=9606 GN=CHEK1 PE=1 SV=2	CHEK1	0.979974	8.86255e-06	127.83	YSS(0.02)S(0.98)QPEPR	2	-0.08267	1	0.664557	0.95122	0.749726	1.28276	1.10736	1.33012
hsa04115 p53 signaling pathway	0.447309	3	1.23	Q9NYZ3	243	1.27	Up	0.0056589	S	G2 and S phase-expressed protein 1 OS=Homo sapiens OX=9606 GN=GTSE1 PE=1 SV=3	GTSE1	0.994614	0.00105388	82.831	EIPAS(0.995)PS(0.005)R	2	0.19228	3	0.944622	0.83913	0.87779	1.15668	1.15913	1.06526
hsa04115 p53 signaling pathway	0.447309	3	1.23	Q9NYZ3	245	1.225	Up	0.0081427	S	G2 and S phase-expressed protein 1 OS=Homo sapiens OX=9606 GN=GTSE1 PE=1 SV=3	GTSE1	0.901836	0.0339553	58.098	KEIPAS(0.098)PS(0.902)R	2	-0.027135	1	0.833866	0.938043	0.938363	1.11982	1.07533	1.1238
hsa05231 Choline metabolism in cancer	0.963833	1	0.33	Q9UBS0	416	2.556	Up	0.00142006	S	Ribosomal protein S6 kinase beta-2 OS=Homo sapiens OX=9606 GN=RPS6KB2 PE=1 SV=2	RPS6KB2	0.994398	0.00771359	64.841	RLNS(0.994)S(0.006)PR	3	-0.54426	1	0.665977	0.612967	0.456459	1.3966	1.58972	1.4494
hsa04916 Melanogenesis	0.916576	1	0.43	P0DP25	102	1.304	Up	0.00041989	S	Calmodulin-3 OS=Homo sapiens OX=9606 GN=CALM3 PE=1 SV=1	CALM3	1	0.000220671	86.987	VFDKDGNGYIS(1)AAELR	3	0.004572	1	0.860182	0.856137	0.893194	1.17683	1.09606	1.12946
hsa04924 Renin secretion	0.808328	1	0.65	P0DP25	102	1.304	Up	0.00041989	S	Calmodulin-3 OS=Homo sapiens OX=9606 GN=CALM3 PE=1 SV=1	CALM3	1	0.000220671	86.987	VFDKDGNGYIS(1)AAELR	3	0.004572	1	0.860182	0.856137	0.893194	1.17683	1.09606	1.12946
hsa05167 Kaposi sarcoma-associated herpesvirus infection	0.942218	3	0.52	Q16539	180	2.17	Up	0.00035653	T	Mitogen-activated protein kinase 14 OS=Homo sapiens OX=9606 GN=MAPK14 PE=1 SV=3	MAPK14	0.999883	0.000118317	84.508	HTDDEMT(1)GY(0.998)VAT(0.002)R	3	0.46926	1	0.71334	0.660397	0.573296	1.46596	1.41754	1.34139
hsa05167 Kaposi sarcoma-associated herpesvirus infection	0.942218	3	0.52	Q16539	182	2.252	Up	3.8544e-05	Y	Mitogen-activated protein kinase 14 OS=Homo sapiens OX=9606 GN=MAPK14 PE=1 SV=3	MAPK14	0.998479	6.03326e-22	194.65	HTDDEMT(0.002)GY(0.998)VATR	2	0.15731	7	0.603595	0.666667	0.628385	1.48511	1.44154	1.34816
hsa05167 Kaposi sarcoma-associated herpesvirus infection	0.942218	3	0.52	P0DP25	102	1.304	Up	0.00041989	S	Calmodulin-3 OS=Homo sapiens OX=9606 GN=CALM3 PE=1 SV=1	CALM3	1	0.000220671	86.987	VFDKDGNGYIS(1)AAELR	3	0.004572	1	0.860182	0.856137	0.893194	1.17683	1.09606	1.12946
hsa05167 Kaposi sarcoma-associated herpesvirus infection	0.942218	3	0.52	P60520	10	1.463	Up	0.023264	S	Gamma-aminobutyric acid receptor-associated protein-like 2 OS=Homo sapiens OX=9606 GN=GABARAPL2 PE=1 SV=1	GABARAPL2	1	0.000694321	89.171	EDHS(1)LEHR	3	0.29567	1	0.751445	0.85458	0.882114	1	1.31208	1.32753
hsa03015 mRNA surveillance pathway	0.20449	7	1.44	Q9UKV3	729	1.451	Up	0.000100134	S	Apoptotic chromatin condensation inducer in the nucleus OS=Homo sapiens OX=9606 GN=ACIN1 PE=1 SV=2	ACIN1	1	6.84502e-16	131.86	LQPERGS(1)PK	3	0.35558	3	0.845581	0.853682	0.802927	1.20508	1.18277	1.24339
hsa03015 mRNA surveillance pathway	0.20449	7	1.44	P33240	524	1.317	Up	0.00080239	S	Cleavage stimulation factor subunit 2 OS=Homo sapiens OX=9606 GN=CSTF2 PE=1 SV=1	CSTF2	0.991886	8.02137e-14	117.7	QVPVMQGTGMQGASIQGGS(0.007)QPGGFS(0.992)PGQNQVTPQDHEK	4	0.021353	2	0.901578	0.848514	0.864711	1.12741	1.11216	1.20312
hsa03015 mRNA surveillance pathway	0.20449	7	1.44	Q92797	494	1.254	Up	0.0030982	S	Symplekin OS=Homo sapiens OX=9606 GN=SYMPK PE=1 SV=2	SYMPK	0.999954	5.85954e-43	228.29	RLS(1)AQGQAISVVGSLSSMSPLEEEAPQAK	3	-0.59368	4	0.946467	0.909729	0.841633	1.12564	1.111	1.14571
hsa03015 mRNA surveillance pathway	0.20449	7	1.44	O94913	777	1.216	Up	4.2836e-05	S	Pre-mRNA cleavage complex 2 protein Pcf11 OS=Homo sapiens OX=9606 GN=PCF11 PE=1 SV=3	PCF11	1	0.00203335	64.21	MIFEGPNKLS(1)PR	3	0.28172	1	0.894164	0.909091	0.913696	1.11315	1.08402	1.10591
hsa03015 mRNA surveillance pathway	0.20449	7	1.44	P52298	13	1.27	Up	0.00160108	S	Nuclear cap-binding protein subunit 2 OS=Homo sapiens OX=9606 GN=NCBP2 PE=1 SV=1	NCBP2	0.988003	2.95516e-05	97.203	S(0.01)DS(0.988)YVELS(0.002)QYR	2	0.77324	1	0.872984	0.909953	0.896353	1.20021	1.09753	1.10419
hsa03015 mRNA surveillance pathway	0.20449	7	1.44	Q8IYB3	207	1.269	Up	0.0136235	S	Serine/arginine repetitive matrix protein 1 OS=Homo sapiens OX=9606 GN=SRRM1 PE=1 SV=2	SRRM1	1	0.00466708	57.973	S(1)RS(1)PS(1)PAPEK	3	0.10975	3	0.842105	0.863402	0.982553	1.11785	1.08743	1.20633
hsa03015 mRNA surveillance pathway	0.20449	7	1.44	Q8IYB3	234	1.419	Up	0.00063768	S	Serine/arginine repetitive matrix protein 1 OS=Homo sapiens OX=9606 GN=SRRM1 PE=1 SV=2	SRRM1	0.992647	2.15069e-07	127.16	VKEPS(0.993)VQEAT(0.007)STSDILK	3	-0.75639	1	0.812394	0.880584	0.849403	1.16947	1.16831	1.26962
hsa03015 mRNA surveillance pathway	0.20449	7	1.44	Q8IYB3	752	1.269	Up	0.022597	S	Serine/arginine repetitive matrix protein 1 OS=Homo sapiens OX=9606 GN=SRRM1 PE=1 SV=2	SRRM1	1	4.12216e-07	124.07	S(1)VS(1)GS(1)PEPAAK	2	-0.4863	2	0.816638	0.884021	0.986226	1.08979	1.09617	1.22405
hsa03015 mRNA surveillance pathway	0.20449	7	1.44	Q8IYB3	220	1.302	Up	0.023278	T	Serine/arginine repetitive matrix protein 1 OS=Homo sapiens OX=9606 GN=SRRM1 PE=1 SV=2	SRRM1	0.99997	1.09402e-05	104.26	EKT(1)PELPEPSVK	5	-0.47579	10	0.904924	0.859107	0.890725	1.03255	1.11257	1.31266
hsa03015 mRNA surveillance pathway	0.20449	7	1.44	Q8IYB3	211	1.373	Up	0.0054224	S	Serine/arginine repetitive matrix protein 1 OS=Homo sapiens OX=9606 GN=SRRM1 PE=1 SV=2	SRRM1	1	0.000566937	68.481	S(1)RS(1)PS(1)PAPEK	3	0.10975	6	0.806452	0.841924	0.940312	1.18743	1.11038	1.25696
hsa03015 mRNA surveillance pathway	0.20449	7	1.44	Q8IYB3	308	1.76	Up	0.004382	S	Serine/arginine repetitive matrix protein 1 OS=Homo sapiens OX=9606 GN=SRRM1 PE=1 SV=2	SRRM1	0.976217	0.0394378	54.486	S(0.012)RS(0.976)Y(0.293)S(0.718)PR	2	0.34549	2	0.795416	0.70189	0.782369	1.15825	1.28962	1.56456
hsa03015 mRNA surveillance pathway	0.20449	7	1.44	Q8IYB3	209	1.62	Up	0.0031214	S	Serine/arginine repetitive matrix protein 1 OS=Homo sapiens OX=9606 GN=SRRM1 PE=1 SV=2	SRRM1	1	0.000566937	68.481	S(1)RS(1)PS(1)PAPEK	3	0.10975	6	0.712224	0.790378	0.87787	1.36364	1.17158	1.32025
hsa03015 mRNA surveillance pathway	0.20449	7	1.44	Q8IYB3	179	2.068	Up	0.00039734	S	Serine/arginine repetitive matrix protein 1 OS=Homo sapiens OX=9606 GN=SRRM1 PE=1 SV=2	SRRM1	0.899397	0.0193043	65.224	S(0.016)RS(0.899)PS(0.085)PR	2	1.0181	1	0.736842	0.662371	0.672176	1.38159	1.58907	1.31266
hsa03015 mRNA surveillance pathway	0.20449	7	1.44	Q8IYB3	416	1.651	Up	0.000158969	T	Serine/arginine repetitive matrix protein 1 OS=Homo sapiens OX=9606 GN=SRRM1 PE=1 SV=2	SRRM1	0.992922	7.13454e-05	105.89	T(0.014)RHS(0.991)PT(0.993)PQQS(0.002)NR	2	0.02307	5	0.788625	0.742268	0.825528	1.27609	1.26776	1.34684
hsa03015 mRNA surveillance pathway	0.20449	7	1.44	Q8IYB3	292	1.915	Up	0.0047784	S	Serine/arginine repetitive matrix protein 1 OS=Homo sapiens OX=9606 GN=SRRM1 PE=1 SV=2	SRRM1	0.999659	0.0021164	70.028	S(1)PSHTRPR	3	-0.8491	3	0.614601	0.841924	0.709826	1.35915	1.22514	1.56329
hsa03015 mRNA surveillance pathway	0.20449	7	1.44	Q8IYB3	532	2.48	Up	0.00116099	S	Serine/arginine repetitive matrix protein 1 OS=Homo sapiens OX=9606 GN=SRRM1 PE=1 SV=2	SRRM1	0.950872	0.0160328	55.461	S(0.003)AS(0.046)PS(0.951)PR	2	0.52352	1	0.56961	0.621993	0.671258	1.72278	1.25683	1.64051
hsa03015 mRNA surveillance pathway	0.20449	7	1.44	Q8IYB3	290	2.031	Up	0.0029777	S	Serine/arginine repetitive matrix protein 1 OS=Homo sapiens OX=9606 GN=SRRM1 PE=1 SV=2	SRRM1	0.974741	0.0121855	44.925	S(0.975)RS(0.721)PS(0.303)HT(0.002)RPR	3	0.62266	1	0.613752	0.717354	0.770432	1.52189	1.18907	1.55823
hsa03015 mRNA surveillance pathway	0.20449	7	1.44	Q9H307	66	2.067	Up	3.6745e-05	S	Pinin OS=Homo sapiens OX=9606 GN=PNN PE=1 SV=5	PNN	0.963561	3.61331e-07	109.79	RGFS(0.964)DS(0.036)GGGPPAK	4	0.24504	7	0.683495	0.700593	0.645594	1.39163	1.46396	1.33891
hsa03015 mRNA surveillance pathway	0.20449	7	1.44	Q9H307	381	1.213	Up	0.0081158	S	Pinin OS=Homo sapiens OX=9606 GN=PNN PE=1 SV=5	PNN	1	3.35821e-31	199.01	QQDS(1)QPEEVMDVLEMVENVK	3	-1.717	16	0.893204	0.988142	0.871648	1.13519	1.09848	1.1046
hsa00564 Glycerophospholipid metabolism	0.808328	1	0.65	Q8IY17	362	1.214	Up	0.04558	S	Neuropathy target esterase OS=Homo sapiens OX=9606 GN=PNPLA6 PE=1 SV=3	PNPLA6	0.919124	2.88587e-05	101.49	LFPSPGLPT(0.006)RT(0.075)S(0.919)PVR	3	-0.11202	1	0.867804	0.874624	0.995906	1.13689	1.00187	1.18492
hsa04022 cGMP-PKG signaling pathway	0.895056	3	0.6	P0DP25	102	1.304	Up	0.00041989	S	Calmodulin-3 OS=Homo sapiens OX=9606 GN=CALM3 PE=1 SV=1	CALM3	1	0.000220671	86.987	VFDKDGNGYIS(1)AAELR	3	0.004572	1	0.860182	0.856137	0.893194	1.17683	1.09606	1.12946
hsa04022 cGMP-PKG signaling pathway	0.895056	3	0.6	P78347	558	1.303	Up	0.033576	T	General transcription factor II-I OS=Homo sapiens OX=9606 GN=GTF2I PE=1 SV=2	GTF2I	0.85532	3.28393e-07	110.35	T(0.145)NT(0.855)PVKEDWNVR	3	0.046344	2	0.794206	0.998031	0.825301	1.24314	1.07411	1.09413
hsa04022 cGMP-PKG signaling pathway	0.895056	3	0.6	O14974	871	1.287	Up	0.048356	S	Protein phosphatase 1 regulatory subunit 12A OS=Homo sapiens OX=9606 GN=PPP1R12A PE=1 SV=1	PPP1R12A	0.970474	5.92247e-68	268.3	STGVSFWTQDSDENEQEQQS(0.97)DT(0.029)EEGSNKK	4	-0.88047	1	0.846008	0.805634	0.976407	1.14407	1.12945	1.1093
hsa05160 Hepatitis C	0.994167	1	0.21	Q13546	320	1.508	Up	0.0105427	S	Receptor-interacting serine/threonine-protein kinase 1 OS=Homo sapiens OX=9606 GN=RIPK1 PE=1 SV=3	RIPK1	1	6.96758e-05	92.289	MQS(1)LQLDCVAVPSSR	2	-0.26441	2	0.750795	0.850431	0.845521	1.39956	1.22883	1.06155
hsa04666 Fc gamma R-mediated phagocytosis	0.965759	2	0.41	P23528	24	1.216	Up	0.047341	S	Cofilin-1 OS=Homo sapiens OX=9606 GN=CFL1 PE=1 SV=3	CFL1	0.789751	0.00949448	57.225	KS(0.172)S(0.79)T(0.039)PEEVK	2	-0.81102	1	0.850679	0.883504	1.00487	1.21468	1.07945	1.03696
hsa04666 Fc gamma R-mediated phagocytosis	0.965759	2	0.41	Q9UBS0	416	2.556	Up	0.00142006	S	Ribosomal protein S6 kinase beta-2 OS=Homo sapiens OX=9606 GN=RPS6KB2 PE=1 SV=2	RPS6KB2	0.994398	0.00771359	64.841	RLNS(0.994)S(0.006)PR	3	-0.54426	1	0.665977	0.612967	0.456459	1.3966	1.58972	1.4494
hsa00052 Galactose metabolism	0.0821784	2	3.9	P17858	775	1.607	Up	0.0032178	S	ATP-dependent 6-phosphofructokinase, liver type OS=Homo sapiens OX=9606 GN=PFKL PE=1 SV=6	PFKL	0.998656	0.000204798	94.688	RT(0.001)LS(0.999)MDK	3	0.30762	2	0.890542	0.706861	0.730489	1.21954	1.21528	1.30616
hsa00052 Galactose metabolism	0.0821784	2	3.9	P17858	773	1.533	Up	0.00042209	T	ATP-dependent 6-phosphofructokinase, liver type OS=Homo sapiens OX=9606 GN=PFKL PE=1 SV=6	PFKL	0.939626	0.00104982	97.734	T(0.94)LS(0.06)MDKGF	2	0.77738	2	0.816153	0.79106	0.78564	1.27466	1.13234	1.26143
hsa00052 Galactose metabolism	0.0821784	2	3.9	P36871	117	1.45	Up	7.5365e-05	S	Phosphoglucomutase-1 OS=Homo sapiens OX=9606 GN=PGM1 PE=1 SV=3	PGM1	0.99941	5.8922e-32	216.64	AIGGIILT(0.001)AS(0.999)HNPGGPNGDFGIK	2	1.0916	12	0.830151	0.863302	0.80746	1.18924	1.2058	1.23173
hsa04270 Vascular smooth muscle contraction	0.548715	4	1.04	Q9NZN5	736	1.276	Up	0.0105604	T	Rho guanine nucleotide exchange factor 12 OS=Homo sapiens OX=9606 GN=ARHGEF12 PE=1 SV=1	ARHGEF12	0.992543	0.000558217	67.234	VT(0.007)EHGT(0.993)PKPFR	4	-0.24544	1	0.852473	0.908913	0.901341	1.02703	1.15762	1.21173
hsa04270 Vascular smooth muscle contraction	0.548715	4	1.04	P0DP25	102	1.304	Up	0.00041989	S	Calmodulin-3 OS=Homo sapiens OX=9606 GN=CALM3 PE=1 SV=1	CALM3	1	0.000220671	86.987	VFDKDGNGYIS(1)AAELR	3	0.004572	1	0.860182	0.856137	0.893194	1.17683	1.09606	1.12946
hsa04270 Vascular smooth muscle contraction	0.548715	4	1.04	Q92888	631	1.272	Up	0.00176281	S	Rho guanine nucleotide exchange factor 1 OS=Homo sapiens OX=9606 GN=ARHGEF1 PE=1 SV=2	ARHGEF1	0.989151	2.22082e-07	127.66	QS(0.011)S(0.989)DPMLSEFK	2	-0.053489	4	0.914454	0.886429	0.872137	1.20042	1.10505	1.09499
hsa04270 Vascular smooth muscle contraction	0.548715	4	1.04	O14974	871	1.287	Up	0.048356	S	Protein phosphatase 1 regulatory subunit 12A OS=Homo sapiens OX=9606 GN=PPP1R12A PE=1 SV=1	PPP1R12A	0.970474	5.92247e-68	268.3	STGVSFWTQDSDENEQEQQS(0.97)DT(0.029)EEGSNKK	4	-0.88047	1	0.846008	0.805634	0.976407	1.14407	1.12945	1.1093
hsa01521 EGFR tyrosine kinase inhibitor resistance	0.976223	1	0.29	Q9UBS0	416	2.556	Up	0.00142006	S	Ribosomal protein S6 kinase beta-2 OS=Homo sapiens OX=9606 GN=RPS6KB2 PE=1 SV=2	RPS6KB2	0.994398	0.00771359	64.841	RLNS(0.994)S(0.006)PR	3	-0.54426	1	0.665977	0.612967	0.456459	1.3966	1.58972	1.4494
hsa05203 Viral carcinogenesis	0.629997	7	0.94	Q14160	1348	1.351	Up	0.035981	S	Protein scribble homolog OS=Homo sapiens OX=9606 GN=SCRIB PE=1 SV=4	SCRIB	0.93406	7.85925e-06	69.462	AFAAVPTSHPPEDAPAQPPT(0.03)PGPAAS(0.934)PEQLS(0.036)FR	4	0.36161	1	1.02405	0.768672	0.853239	1.10073	1.31064	1.16434
hsa05203 Viral carcinogenesis	0.629997	7	0.94	Q12834	59	1.359	Up	0.0001152	T	Cell division cycle protein 20 homolog OS=Homo sapiens OX=9606 GN=CDC20 PE=1 SV=2	CDC20	0.998818	0.0182197	47.894	T(0.001)PGRT(0.999)PGK	3	0.14876	2	0.844011	0.888458	0.845513	1.17898	1.18238	1.14159
hsa05203 Viral carcinogenesis	0.629997	7	0.94	Q12834	106	1.423	Up	0.0118045	T	Cell division cycle protein 20 homolog OS=Homo sapiens OX=9606 GN=CDC20 PE=1 SV=2	CDC20	0.958264	3.66038e-08	124.5	ENQPENS(0.003)QT(0.958)PT(0.039)KK	4	0.31123	3	0.847725	0.85257	0.814986	1.07076	1.12746	1.38164
hsa05203 Viral carcinogenesis	0.629997	7	0.94	Q12834	70	1.386	Up	0.007641	T	Cell division cycle protein 20 homolog OS=Homo sapiens OX=9606 GN=CDC20 PE=1 SV=2	CDC20	0.891078	2.53554e-11	153.2	VQT(0.105)T(0.891)PS(0.004)KPGGDR	2	0.20885	3	0.866295	0.916586	0.767808	1.14152	1.12021	1.27434
hsa05203 Viral carcinogenesis	0.629997	7	0.94	Q12834	41	1.445	Up	0.0044796	S	Cell division cycle protein 20 homolog OS=Homo sapiens OX=9606 GN=CDC20 PE=1 SV=2	CDC20	1	0.000282221	82.663	EAAGPAPS(1)PMR	2	0.08506	1	0.910864	0.798254	0.790009	1.18106	1.12332	1.30642
hsa05203 Viral carcinogenesis	0.629997	7	0.94	P61978	379	1.617	Up	4.3805e-05	S	Heterogeneous nuclear ribonucleoprotein K OS=Homo sapiens OX=9606 GN=HNRNPK PE=1 SV=1	HNRNPK	1	2.78907e-67	268.75	GS(1)YGDLGGPIITTQVTIPK	2	-1.4512	3	0.770813	0.783203	0.777186	1.28372	1.29141	1.19412
hsa05203 Viral carcinogenesis	0.629997	7	0.94	P28749	964	1.43	Up	0.00127967	S	Retinoblastoma-like protein 1 OS=Homo sapiens OX=9606 GN=RBL1 PE=1 SV=3	RBL1	1	1.049e-07	120.13	YDLANQDHMMDAPPLS(1)PFPHIK	4	-0.86569	1	0.782369	0.834297	0.890748	1.14015	1.23392	1.21064
hsa05203 Viral carcinogenesis	0.629997	7	0.94	O14757	317	1.573	Up	0.0181016	S	Serine/threonine-protein kinase Chk1 OS=Homo sapiens OX=9606 GN=CHEK1 PE=1 SV=2	CHEK1	0.979974	8.86255e-06	127.83	YSS(0.02)S(0.98)QPEPR	2	-0.08267	1	0.664557	0.95122	0.749726	1.28276	1.10736	1.33012
hsa05203 Viral carcinogenesis	0.629997	7	0.94	P14618	249	1.211	Up	0.035662	S	Pyruvate kinase PKM OS=Homo sapiens OX=9606 GN=PKM PE=1 SV=4	PKM	1	0.00129665	76.357	KAS(1)DVHEVR	4	-0.011322	2	0.89881	0.886026	0.946482	1.07614	1.22467	1.00798
hsa05203 Viral carcinogenesis	0.629997	7	0.94	Q05086	218	1.279	Up	0.025242	S	Ubiquitin-protein ligase E3A OS=Homo sapiens OX=9606 GN=UBE3A PE=1 SV=4	UBE3A	0.875411	2.94496e-11	137.52	IGDS(0.125)S(0.875)QGDNNLQK	2	-0.98208	2	0.903128	0.889336	0.892137	1.23535	1.1083	1.08964
hsa04650 Natural killer cell mediated cytotoxicity	0.923032	2	0.5	P43403	106	1.203	Up	0.036162	S	Tyrosine-protein kinase ZAP-70 OS=Homo sapiens OX=9606 GN=ZAP70 PE=1 SV=1	ZAP70	1	0.000234608	67.496	KPCNRPS(1)GLEPQPGVFDCLR	4	0.29141	1	0.872816	0.993097	0.896065	1.15692	1.15456	1.01118
hsa04650 Natural killer cell mediated cytotoxicity	0.923032	2	0.5	P06239	158	1.297	Up	0.0058213	S	Tyrosine-protein kinase Lck OS=Homo sapiens OX=9606 GN=LCK PE=1 SV=6	LCK	0.899898	0.000522489	77.795	ES(0.021)ES(0.9)T(0.078)AGS(0.001)FSLSVR	2	-0.78547	1	0.796709	0.889423	0.924453	1.15988	1.13996	1.08577
hsa04650 Natural killer cell mediated cytotoxicity	0.923032	2	0.5	P06239	394	1.225	Up	0.00126248	Y	Tyrosine-protein kinase Lck OS=Homo sapiens OX=9606 GN=LCK PE=1 SV=6	LCK	0.993133	5.27585e-10	153.34	LIEDNEY(0.993)T(0.007)AR	3	0.54142	3	0.893514	0.927885	0.865805	1.0854	1.13083	1.07669
hsa04650 Natural killer cell mediated cytotoxicity	0.923032	2	0.5	P06239	505	1.276	Up	0.037598	Y	Tyrosine-protein kinase Lck OS=Homo sapiens OX=9606 GN=LCK PE=1 SV=6	LCK	0.999913	6.68754e-17	174.62	SVLEDFFTATEGQY(1)QPQP	2	-0.57314	3	1.00194	0.791346	0.847913	1.19067	1.13996	1.03935
hsa05200 Pathways in cancer	0.917162	8	0.69	P14921	26	1.554	Up	0.00063842	S	Protein C-ets-1 OS=Homo sapiens OX=9606 GN=ETS1 PE=1 SV=1	ETS1	0.999999	6.73664e-06	88.394	VDLELFPS(1)PDMECADVPLLTPSSK	3	-2.0065	3	0.819085	0.801205	0.74514	1.3102	1.20058	1.16435
hsa05200 Pathways in cancer	0.917162	8	0.69	P63208	131	1.367	Up	0.00020489	T	S-phase kinase-associated protein 1 OS=Homo sapiens OX=9606 GN=SKP1 PE=1 SV=2	SKP1	1	0.00750675	61.344	GKT(1)PEEIRK	4	0.0066299	4	0.869648	0.863501	0.813084	1.14462	1.14822	1.18687
hsa05200 Pathways in cancer	0.917162	8	0.69	Q9NZN5	736	1.276	Up	0.0105604	T	Rho guanine nucleotide exchange factor 12 OS=Homo sapiens OX=9606 GN=ARHGEF12 PE=1 SV=1	ARHGEF12	0.992543	0.000558217	67.234	VT(0.007)EHGT(0.993)PKPFR	4	-0.24544	1	0.852473	0.908913	0.901341	1.02703	1.15762	1.21173
hsa05200 Pathways in cancer	0.917162	8	0.69	P0DP25	102	1.304	Up	0.00041989	S	Calmodulin-3 OS=Homo sapiens OX=9606 GN=CALM3 PE=1 SV=1	CALM3	1	0.000220671	86.987	VFDKDGNGYIS(1)AAELR	3	0.004572	1	0.860182	0.856137	0.893194	1.17683	1.09606	1.12946
hsa05200 Pathways in cancer	0.917162	8	0.69	Q92888	631	1.272	Up	0.00176281	S	Rho guanine nucleotide exchange factor 1 OS=Homo sapiens OX=9606 GN=ARHGEF1 PE=1 SV=2	ARHGEF1	0.989151	2.22082e-07	127.66	QS(0.011)S(0.989)DPMLSEFK	2	-0.053489	4	0.914454	0.886429	0.872137	1.20042	1.10505	1.09499
hsa05200 Pathways in cancer	0.917162	8	0.69	P12270	2155	1.372	Up	0.0013171	S	Nucleoprotein TPR OS=Homo sapiens OX=9606 GN=TPR PE=1 SV=3	TPR	1	9.31754e-16	167.87	TDGFAEAIHS(1)PQVAGVPR	2	-0.28406	2	0.891304	0.852036	0.825121	1.25226	1.13992	1.13264
hsa05200 Pathways in cancer	0.917162	8	0.69	P12270	2137	2.066	Up	0.00061722	T	Nucleoprotein TPR OS=Homo sapiens OX=9606 GN=TPR PE=1 SV=3	TPR	0.939872	3.75324e-05	88.987	TVPS(0.039)T(0.94)PT(0.021)LVVPHR	3	-0.23909	2	0.655138	0.595829	0.763285	1.40905	1.41872	1.33368
hsa05200 Pathways in cancer	0.917162	8	0.69	Q9UBS0	416	2.556	Up	0.00142006	S	Ribosomal protein S6 kinase beta-2 OS=Homo sapiens OX=9606 GN=RPS6KB2 PE=1 SV=2	RPS6KB2	0.994398	0.00771359	64.841	RLNS(0.994)S(0.006)PR	3	-0.54426	1	0.665977	0.612967	0.456459	1.3966	1.58972	1.4494
hsa05200 Pathways in cancer	0.917162	8	0.69	P29590	8	1.375	Up	0.039518	S	Protein PML OS=Homo sapiens OX=9606 GN=PML PE=1 SV=3	PML	0.999756	1.41572e-05	73.239	S(1)PRPQQDPARPQEPTMPPPETPSEGR	4	-0.36428	1	0.983794	0.805985	0.776022	1.36013	1.0916	1.07614
hsa03430 Mismatch repair	0.323744	2	1.73	P15927	238	1.486	Up	0.0087597	S	Replication protein A 32 kDa subunit OS=Homo sapiens OX=9606 GN=RPA2 PE=1 SV=1	RPA2	0.951327	0.00157633	74.424	HMS(0.951)VS(0.048)SIK	3	-0.12673	1	0.815488	0.819404	0.849462	1.23469	1.05844	1.39783
hsa03430 Mismatch repair	0.323744	2	1.73	P27694	315	1.282	Up	0.00102158	S	Replication protein A 70 kDa DNA-binding subunit OS=Homo sapiens OX=9606 GN=RPA1 PE=1 SV=2	RPA1	0.814062	0.000116879	85.087	S(0.186)KDS(0.814)LVDIIGICK	3	0.14761	1	0.897824	0.859223	0.911992	1.14528	1.09372	1.18359
hsa03430 Mismatch repair	0.323744	2	1.73	P27694	38	1.285	Up	0.046263	S	Replication protein A 70 kDa DNA-binding subunit OS=Homo sapiens OX=9606 GN=RPA1 PE=1 SV=2	RPA1	0.992594	0.000665856	77.597	PITT(0.007)GNS(0.993)PPR	2	1.8355	1	0.952696	0.852427	0.868472	1.33298	1.05751	1.04615
hsa04261 Adrenergic signaling in cardiomyocytes	0.850672	2	0.62	Q16539	180	2.17	Up	0.00035653	T	Mitogen-activated protein kinase 14 OS=Homo sapiens OX=9606 GN=MAPK14 PE=1 SV=3	MAPK14	0.999883	0.000118317	84.508	HTDDEMT(1)GY(0.998)VAT(0.002)R	3	0.46926	1	0.71334	0.660397	0.573296	1.46596	1.41754	1.34139
hsa04261 Adrenergic signaling in cardiomyocytes	0.850672	2	0.62	Q16539	182	2.252	Up	3.8544e-05	Y	Mitogen-activated protein kinase 14 OS=Homo sapiens OX=9606 GN=MAPK14 PE=1 SV=3	MAPK14	0.998479	6.03326e-22	194.65	HTDDEMT(0.002)GY(0.998)VATR	2	0.15731	7	0.603595	0.666667	0.628385	1.48511	1.44154	1.34816
hsa04261 Adrenergic signaling in cardiomyocytes	0.850672	2	0.62	P0DP25	102	1.304	Up	0.00041989	S	Calmodulin-3 OS=Homo sapiens OX=9606 GN=CALM3 PE=1 SV=1	CALM3	1	0.000220671	86.987	VFDKDGNGYIS(1)AAELR	3	0.004572	1	0.860182	0.856137	0.893194	1.17683	1.09606	1.12946
hsa05012 Parkinson disease	0.373251	2	1.56	P36542	146	1.326	Up	0.00186417	S	ATP synthase subunit gamma, mitochondrial OS=Homo sapiens OX=9606 GN=ATP5F1C PE=1 SV=1	ATP5F1C	0.848104	6.42345e-05	87.083	T(0.152)HS(0.848)DQFLVAFK	3	0.14265	1	0.803016	0.915907	0.860324	1.13105	1.15733	1.13043
hsa05012 Parkinson disease	0.373251	2	1.56	P06576	465	2.416	Up	1.69111e-05	S	ATP synthase subunit beta, mitochondrial OS=Homo sapiens OX=9606 GN=ATP5F1B PE=1 SV=3	ATP5F1B	0.999999	5.26017e-05	96.723	FLS(1)QPFQVAEVFTGHMGK	3	0.090395	2	0.623975	0.588008	0.587669	1.38215	1.52314	1.44229
hsa04621 NOD-like receptor signaling pathway	0.406986	6	1.17	Q16539	180	2.17	Up	0.00035653	T	Mitogen-activated protein kinase 14 OS=Homo sapiens OX=9606 GN=MAPK14 PE=1 SV=3	MAPK14	0.999883	0.000118317	84.508	HTDDEMT(1)GY(0.998)VAT(0.002)R	3	0.46926	1	0.71334	0.660397	0.573296	1.46596	1.41754	1.34139
hsa04621 NOD-like receptor signaling pathway	0.406986	6	1.17	Q16539	182	2.252	Up	3.8544e-05	Y	Mitogen-activated protein kinase 14 OS=Homo sapiens OX=9606 GN=MAPK14 PE=1 SV=3	MAPK14	0.998479	6.03326e-22	194.65	HTDDEMT(0.002)GY(0.998)VATR	2	0.15731	7	0.603595	0.666667	0.628385	1.48511	1.44154	1.34816
hsa04621 NOD-like receptor signaling pathway	0.406986	6	1.17	Q13546	320	1.508	Up	0.0105427	S	Receptor-interacting serine/threonine-protein kinase 1 OS=Homo sapiens OX=9606 GN=RIPK1 PE=1 SV=3	RIPK1	1	6.96758e-05	92.289	MQS(1)LQLDCVAVPSSR	2	-0.26441	2	0.750795	0.850431	0.845521	1.39956	1.22883	1.06155
hsa04621 NOD-like receptor signaling pathway	0.406986	6	1.17	Q12888	523	1.292	Up	0.0021567	S	TP53-binding protein 1 OS=Homo sapiens OX=9606 GN=TP53BP1 PE=1 SV=2	TP53BP1	0.999916	5.75581e-21	178.85	LMLSTSEYS(1)QS(1)PK	2	-2.4657	2	0.919765	0.913171	0.83559	1.1159	1.1403	1.19259
hsa04621 NOD-like receptor signaling pathway	0.406986	6	1.17	Q12888	580	1.21	Up	0.0040229	S	TP53-binding protein 1 OS=Homo sapiens OX=9606 GN=TP53BP1 PE=1 SV=2	TP53BP1	1	3.17452e-18	168.52	FVPAENDSILMNPAQDGEVQLS(1)QNDDK	4	1.65	5	0.891389	0.924878	0.944874	1.05436	1.14873	1.13757
hsa04621 NOD-like receptor signaling pathway	0.406986	6	1.17	Q12888	525	1.292	Up	0.0021567	S	TP53-binding protein 1 OS=Homo sapiens OX=9606 GN=TP53BP1 PE=1 SV=2	TP53BP1	1	5.75581e-21	178.85	LMLSTSEYS(1)QS(1)PK	2	-2.4657	2	0.919765	0.913171	0.83559	1.1159	1.1403	1.19259
hsa04621 NOD-like receptor signaling pathway	0.406986	6	1.17	Q16666	123	1.484	Up	0.00100406	T	Gamma-interferon-inducible protein 16 OS=Homo sapiens OX=9606 GN=IFI16 PE=1 SV=3	IFI16	1	3.57291e-07	119.45	TEGAEAT(1)PGAQK	2	-0.19036	1	0.862934	0.787726	0.814706	1.27737	1.13131	1.24923
hsa04621 NOD-like receptor signaling pathway	0.406986	6	1.17	P60520	10	1.463	Up	0.023264	S	Gamma-aminobutyric acid receptor-associated protein-like 2 OS=Homo sapiens OX=9606 GN=GABARAPL2 PE=1 SV=1	GABARAPL2	1	0.000694321	89.171	EDHS(1)LEHR	3	0.29567	1	0.751445	0.85458	0.882114	1	1.31208	1.32753
hsa04621 NOD-like receptor signaling pathway	0.406986	6	1.17	O00429	529	1.488	Up	0.00134434	S	Dynamin-1-like protein OS=Homo sapiens OX=9606 GN=DNM1L PE=1 SV=2	DNM1L	0.986969	0.00934587	51.726	ELPS(0.013)AVS(0.987)RDK	3	0.23539	1	0.887967	0.770217	0.800834	1.2387	1.15713	1.26294
hsa04714 Thermogenesis	0.0207005	10	2	Q16539	180	2.17	Up	0.00035653	T	Mitogen-activated protein kinase 14 OS=Homo sapiens OX=9606 GN=MAPK14 PE=1 SV=3	MAPK14	0.999883	0.000118317	84.508	HTDDEMT(1)GY(0.998)VAT(0.002)R	3	0.46926	1	0.71334	0.660397	0.573296	1.46596	1.41754	1.34139
hsa04714 Thermogenesis	0.0207005	10	2	Q16539	182	2.252	Up	3.8544e-05	Y	Mitogen-activated protein kinase 14 OS=Homo sapiens OX=9606 GN=MAPK14 PE=1 SV=3	MAPK14	0.998479	6.03326e-22	194.65	HTDDEMT(0.002)GY(0.998)VATR	2	0.15731	7	0.603595	0.666667	0.628385	1.48511	1.44154	1.34816
hsa04714 Thermogenesis	0.0207005	10	2	P36542	146	1.326	Up	0.00186417	S	ATP synthase subunit gamma, mitochondrial OS=Homo sapiens OX=9606 GN=ATP5F1C PE=1 SV=1	ATP5F1C	0.848104	6.42345e-05	87.083	T(0.152)HS(0.848)DQFLVAFK	3	0.14265	1	0.803016	0.915907	0.860324	1.13105	1.15733	1.13043
hsa04714 Thermogenesis	0.0207005	10	2	Q13131	524	1.223	Up	0.041024	S	5'-AMP-activated protein kinase catalytic subunit alpha-1 OS=Homo sapiens OX=9606 GN=PRKAA1 PE=1 SV=4	PRKAA1	0.818051	1.36024e-07	120.05	SSEVS(0.001)LT(0.029)S(0.151)S(0.818)VT(0.007)S(0.991)LDS(0.002)SPVDLTPR	3	0.64002	3	0.820746	0.947162	0.923009	1.20225	1.07925	1.00904
hsa04714 Thermogenesis	0.0207005	10	2	Q8N183	134	1.347	Up	0.00106118	S	NADH dehydrogenase [ubiquinone] 1 alpha subcomplex assembly factor 2 OS=Homo sapiens OX=9606 GN=NDUFAF2 PE=1 SV=1	NDUFAF2	0.999802	0.000699884	68.536	GHAS(1)APYFGK	3	0.33346	1	0.876371	0.837616	0.87526	1.22751	1.0999	1.15905
hsa04714 Thermogenesis	0.0207005	10	2	Q96AD5	428	1.258	Up	0.00504	S	Patatin-like phospholipase domain-containing protein 2 OS=Homo sapiens OX=9606 GN=PNPLA2 PE=1 SV=1	PNPLA2	1	4.93846e-11	149.32	NNLS(1)LGDALAKWEECQR	3	-0.060794	7	0.919634	0.904245	0.857834	1.1972	1.11542	1.06052
hsa04714 Thermogenesis	0.0207005	10	2	Q15418	687	1.479	Up	0.0068244	S	Ribosomal protein S6 kinase alpha-1 OS=Homo sapiens OX=9606 GN=RPS6KA1 PE=1 SV=2	RPS6KA1	0.983875	1.52732e-05	105.51	DKLPQS(0.016)QLS(0.984)HQDLQLVK	4	-0.28314	1	0.866178	0.771154	0.807586	1.04921	1.26688	1.30104
hsa04714 Thermogenesis	0.0207005	10	2	Q7LBC6	1267	1.348	Up	0.00135891	S	Lysine-specific demethylase 3B OS=Homo sapiens OX=9606 GN=KDM3B PE=1 SV=2	KDM3B	0.942445	0.0103439	61.56	VS(0.942)PLT(0.058)PK	2	0.54456	1	0.902465	0.806288	0.878594	1.1784	1.18511	1.12537
hsa04714 Thermogenesis	0.0207005	10	2	Q7LBC6	614	1.302	Up	4.1955e-05	T	Lysine-specific demethylase 3B OS=Homo sapiens OX=9606 GN=KDM3B PE=1 SV=2	KDM3B	1	5.8083e-05	91.926	T(1)PENHENLFLQPPK	4	0.35743	2	0.892819	0.855984	0.887114	1.13983	1.15363	1.1381
hsa04714 Thermogenesis	0.0207005	10	2	Q9Y4C1	447	1.299	Up	0.022422	S	Lysine-specific demethylase 3A OS=Homo sapiens OX=9606 GN=KDM3A PE=1 SV=4	KDM3A	0.887308	1.55428e-23	195.09	HLEHAPS(0.113)PS(0.887)DVSNAPEVK	3	0.6193	2	0.813472	0.9371	0.865204	1.18671	1.00353	1.20796
hsa04714 Thermogenesis	0.0207005	10	2	P06576	465	2.416	Up	1.69111e-05	S	ATP synthase subunit beta, mitochondrial OS=Homo sapiens OX=9606 GN=ATP5F1B PE=1 SV=3	ATP5F1B	0.999999	5.26017e-05	96.723	FLS(1)QPFQVAEVFTGHMGK	3	0.090395	2	0.623975	0.588008	0.587669	1.38215	1.52314	1.44229
hsa04714 Thermogenesis	0.0207005	10	2	Q9UBS0	416	2.556	Up	0.00142006	S	Ribosomal protein S6 kinase beta-2 OS=Homo sapiens OX=9606 GN=RPS6KB2 PE=1 SV=2	RPS6KB2	0.994398	0.00771359	64.841	RLNS(0.994)S(0.006)PR	3	-0.54426	1	0.665977	0.612967	0.456459	1.3966	1.58972	1.4494
hsa04211 Longevity regulating pathway	0.89234	2	0.56	Q13131	524	1.223	Up	0.041024	S	5'-AMP-activated protein kinase catalytic subunit alpha-1 OS=Homo sapiens OX=9606 GN=PRKAA1 PE=1 SV=4	PRKAA1	0.818051	1.36024e-07	120.05	SSEVS(0.001)LT(0.029)S(0.151)S(0.818)VT(0.007)S(0.991)LDS(0.002)SPVDLTPR	3	0.64002	3	0.820746	0.947162	0.923009	1.20225	1.07925	1.00904
hsa04211 Longevity regulating pathway	0.89234	2	0.56	Q9UBS0	416	2.556	Up	0.00142006	S	Ribosomal protein S6 kinase beta-2 OS=Homo sapiens OX=9606 GN=RPS6KB2 PE=1 SV=2	RPS6KB2	0.994398	0.00771359	64.841	RLNS(0.994)S(0.006)PR	3	-0.54426	1	0.665977	0.612967	0.456459	1.3966	1.58972	1.4494
hsa00051 Fructose and mannose metabolism	0.666991	1	0.98	P17858	775	1.607	Up	0.0032178	S	ATP-dependent 6-phosphofructokinase, liver type OS=Homo sapiens OX=9606 GN=PFKL PE=1 SV=6	PFKL	0.998656	0.000204798	94.688	RT(0.001)LS(0.999)MDK	3	0.30762	2	0.890542	0.706861	0.730489	1.21954	1.21528	1.30616
hsa00051 Fructose and mannose metabolism	0.666991	1	0.98	P17858	773	1.533	Up	0.00042209	T	ATP-dependent 6-phosphofructokinase, liver type OS=Homo sapiens OX=9606 GN=PFKL PE=1 SV=6	PFKL	0.939626	0.00104982	97.734	T(0.94)LS(0.06)MDKGF	2	0.77738	2	0.816153	0.79106	0.78564	1.27466	1.13234	1.26143
hsa05205 Proteoglycans in cancer	0.789368	6	0.79	Q16539	180	2.17	Up	0.00035653	T	Mitogen-activated protein kinase 14 OS=Homo sapiens OX=9606 GN=MAPK14 PE=1 SV=3	MAPK14	0.999883	0.000118317	84.508	HTDDEMT(1)GY(0.998)VAT(0.002)R	3	0.46926	1	0.71334	0.660397	0.573296	1.46596	1.41754	1.34139
hsa05205 Proteoglycans in cancer	0.789368	6	0.79	Q16539	182	2.252	Up	3.8544e-05	Y	Mitogen-activated protein kinase 14 OS=Homo sapiens OX=9606 GN=MAPK14 PE=1 SV=3	MAPK14	0.998479	6.03326e-22	194.65	HTDDEMT(0.002)GY(0.998)VATR	2	0.15731	7	0.603595	0.666667	0.628385	1.48511	1.44154	1.34816
hsa05205 Proteoglycans in cancer	0.789368	6	0.79	P21333	1084	1.334	Up	0.0040447	S	Filamin-A OS=Homo sapiens OX=9606 GN=FLNA PE=1 SV=4	FLNA	0.999915	7.25433e-16	133.92	AFGPGLQGGSAGS(1)PAR	2	-0.31133	3	0.859571	0.874202	0.889823	1.26867	1.07805	1.15385
hsa05205 Proteoglycans in cancer	0.789368	6	0.79	P21333	1459	1.357	Up	0.03862	S	Filamin-A OS=Homo sapiens OX=9606 GN=FLNA PE=1 SV=4	FLNA	0.999994	3.24732e-06	107.69	CSGPGLS(1)PGMVR	2	-1.2437	1	0.855993	0.84412	0.907563	1.4136	1.06335	1.06176
hsa05205 Proteoglycans in cancer	0.789368	6	0.79	Q9NZN5	736	1.276	Up	0.0105604	T	Rho guanine nucleotide exchange factor 12 OS=Homo sapiens OX=9606 GN=ARHGEF12 PE=1 SV=1	ARHGEF12	0.992543	0.000558217	67.234	VT(0.007)EHGT(0.993)PKPFR	4	-0.24544	1	0.852473	0.908913	0.901341	1.02703	1.15762	1.21173
hsa05205 Proteoglycans in cancer	0.789368	6	0.79	Q92888	631	1.272	Up	0.00176281	S	Rho guanine nucleotide exchange factor 1 OS=Homo sapiens OX=9606 GN=ARHGEF1 PE=1 SV=2	ARHGEF1	0.989151	2.22082e-07	127.66	QS(0.011)S(0.989)DPMLSEFK	2	-0.053489	4	0.914454	0.886429	0.872137	1.20042	1.10505	1.09499
hsa05205 Proteoglycans in cancer	0.789368	6	0.79	Q9UBS0	416	2.556	Up	0.00142006	S	Ribosomal protein S6 kinase beta-2 OS=Homo sapiens OX=9606 GN=RPS6KB2 PE=1 SV=2	RPS6KB2	0.994398	0.00771359	64.841	RLNS(0.994)S(0.006)PR	3	-0.54426	1	0.665977	0.612967	0.456459	1.3966	1.58972	1.4494
hsa05205 Proteoglycans in cancer	0.789368	6	0.79	O14974	871	1.287	Up	0.048356	S	Protein phosphatase 1 regulatory subunit 12A OS=Homo sapiens OX=9606 GN=PPP1R12A PE=1 SV=1	PPP1R12A	0.970474	5.92247e-68	268.3	STGVSFWTQDSDENEQEQQS(0.97)DT(0.029)EEGSNKK	4	-0.88047	1	0.846008	0.805634	0.976407	1.14407	1.12945	1.1093
hsa05226 Gastric cancer	0.972652	1	0.3	Q9UBS0	416	2.556	Up	0.00142006	S	Ribosomal protein S6 kinase beta-2 OS=Homo sapiens OX=9606 GN=RPS6KB2 PE=1 SV=2	RPS6KB2	0.994398	0.00771359	64.841	RLNS(0.994)S(0.006)PR	3	-0.54426	1	0.665977	0.612967	0.456459	1.3966	1.58972	1.4494
hsa05206 MicroRNAs in cancer	0.901925	4	0.62	P61978	379	1.617	Up	4.3805e-05	S	Heterogeneous nuclear ribonucleoprotein K OS=Homo sapiens OX=9606 GN=HNRNPK PE=1 SV=1	HNRNPK	1	2.78907e-67	268.75	GS(1)YGDLGGPIITTQVTIPK	2	-1.4512	3	0.770813	0.783203	0.777186	1.28372	1.29141	1.19412
hsa05206 MicroRNAs in cancer	0.901925	4	0.62	P08670	430	1.362	Up	0.00045529	S	Vimentin OS=Homo sapiens OX=9606 GN=VIM PE=1 SV=4	VIM	0.99998	1.32958e-11	149.44	ETNLDS(1)LPLVDTHSK	3	-0.077066	3	0.893023	0.838123	0.838123	1.125	1.16737	1.20597
hsa05206 MicroRNAs in cancer	0.901925	4	0.62	P16949	31	1.318	Up	0.00064083	S	Stathmin OS=Homo sapiens OX=9606 GN=STMN1 PE=1 SV=3	STMN1	0.80194	1.14088e-06	109.72	S(0.198)KES(0.802)VPEFPLS(1)PPK	4	-0.67156	3	0.814672	0.889003	0.882292	1.12602	1.13175	1.14981
hsa05206 MicroRNAs in cancer	0.901925	4	0.62	Q02241	160	1.419	Up	0.00046125	S	Kinesin-like protein KIF23 OS=Homo sapiens OX=9606 GN=KIF23 PE=1 SV=3	KIF23	0.999962	2.31495e-31	206.67	SNDRNS(1)MDIQCEVDALLER	3	-0.13011	1	0.848214	0.795139	0.854945	1.23761	1.16304	1.1435
hsa04934 Cushing syndrome	0.945375	2	0.46	Q03164	337	1.235	Up	0.020636	T	Histone-lysine N-methyltransferase 2A OS=Homo sapiens OX=9606 GN=KMT2A PE=1 SV=5	KMT2A	0.998224	0.00517325	57.434	DKEGT(0.998)PPLT(0.002)K	4	3.4573	1	0.881256	0.908602	0.93254	1.00949	1.21209	1.14186
hsa04934 Cushing syndrome	0.945375	2	0.46	Q03164	532	1.485	Up	0.0254	S	Histone-lysine N-methyltransferase 2A OS=Homo sapiens OX=9606 GN=KMT2A PE=1 SV=5	KMT2A	0.968259	0.0344149	43.308	RY(0.03)S(0.968)VS(0.002)ER	3	-0.16616	1	0.872424	0.711828	0.875	1.07489	1.43954	1.13686
hsa04934 Cushing syndrome	0.945375	2	0.46	Q03164	351	1.823	Up	0.0058417	S	Histone-lysine N-methyltransferase 2A OS=Homo sapiens OX=9606 GN=KMT2A PE=1 SV=5	KMT2A	0.999921	0.00838154	69.216	TVVRQS(1)PR	2	-0.25845	1	0.672228	0.890323	0.616071	1.39241	1.30518	1.27373
hsa04934 Cushing syndrome	0.945375	2	0.46	O14686	1606	1.479	Up	0.0051827	S	Histone-lysine N-methyltransferase 2D OS=Homo sapiens OX=9606 GN=KMT2D PE=1 SV=2	KMT2D	0.996818	8.05204e-05	105.65	NLT(0.003)MS(0.997)PLHK	3	0.31656	1	0.898537	0.81044	0.753351	1.18182	1.12965	1.3305
hsa04914 Progesterone-mediated oocyte maturation	0.780676	3	0.76	Q16539	180	2.17	Up	0.00035653	T	Mitogen-activated protein kinase 14 OS=Homo sapiens OX=9606 GN=MAPK14 PE=1 SV=3	MAPK14	0.999883	0.000118317	84.508	HTDDEMT(1)GY(0.998)VAT(0.002)R	3	0.46926	1	0.71334	0.660397	0.573296	1.46596	1.41754	1.34139
hsa04914 Progesterone-mediated oocyte maturation	0.780676	3	0.76	Q16539	182	2.252	Up	3.8544e-05	Y	Mitogen-activated protein kinase 14 OS=Homo sapiens OX=9606 GN=MAPK14 PE=1 SV=3	MAPK14	0.998479	6.03326e-22	194.65	HTDDEMT(0.002)GY(0.998)VATR	2	0.15731	7	0.603595	0.666667	0.628385	1.48511	1.44154	1.34816
hsa04914 Progesterone-mediated oocyte maturation	0.780676	3	0.76	Q13257	195	1.369	Up	0.004359	S	Mitotic spindle assembly checkpoint protein MAD2A OS=Homo sapiens OX=9606 GN=MAD2L1 PE=1 SV=1	MAD2L1	0.99912	0.00178722	81.709	VNS(0.999)MVAY(0.001)K	2	-1.5956	4	0.814151	0.871531	0.851961	1.19283	1.2333	1.04758
hsa04914 Progesterone-mediated oocyte maturation	0.780676	3	0.76	Q15418	687	1.479	Up	0.0068244	S	Ribosomal protein S6 kinase alpha-1 OS=Homo sapiens OX=9606 GN=RPS6KA1 PE=1 SV=2	RPS6KA1	0.983875	1.52732e-05	105.51	DKLPQS(0.016)QLS(0.984)HQDLQLVK	4	-0.28314	1	0.866178	0.771154	0.807586	1.04921	1.26688	1.30104
hsa04925 Aldosterone synthesis and secretion	0.958416	1	0.34	P0DP25	102	1.304	Up	0.00041989	S	Calmodulin-3 OS=Homo sapiens OX=9606 GN=CALM3 PE=1 SV=1	CALM3	1	0.000220671	86.987	VFDKDGNGYIS(1)AAELR	3	0.004572	1	0.860182	0.856137	0.893194	1.17683	1.09606	1.12946
hsa00071 Fatty acid degradation	0.496633	1	1.56	P51648	293	2.199	Up	0.024818	S	Fatty aldehyde dehydrogenase OS=Homo sapiens OX=9606 GN=ALDH3A2 PE=1 SV=1	ALDH3A2	1	0.0232812	40.727	ILS(1)LLEGQK	3	-0.47646	1	0.890503	0.609589	0.418217	1.23077	1.32709	1.66071
hsa04668 TNF signaling pathway	0.64	3	0.94	Q16539	180	2.17	Up	0.00035653	T	Mitogen-activated protein kinase 14 OS=Homo sapiens OX=9606 GN=MAPK14 PE=1 SV=3	MAPK14	0.999883	0.000118317	84.508	HTDDEMT(1)GY(0.998)VAT(0.002)R	3	0.46926	1	0.71334	0.660397	0.573296	1.46596	1.41754	1.34139
hsa04668 TNF signaling pathway	0.64	3	0.94	Q16539	182	2.252	Up	3.8544e-05	Y	Mitogen-activated protein kinase 14 OS=Homo sapiens OX=9606 GN=MAPK14 PE=1 SV=3	MAPK14	0.998479	6.03326e-22	194.65	HTDDEMT(0.002)GY(0.998)VATR	2	0.15731	7	0.603595	0.666667	0.628385	1.48511	1.44154	1.34816
hsa04668 TNF signaling pathway	0.64	3	0.94	Q13546	320	1.508	Up	0.0105427	S	Receptor-interacting serine/threonine-protein kinase 1 OS=Homo sapiens OX=9606 GN=RIPK1 PE=1 SV=3	RIPK1	1	6.96758e-05	92.289	MQS(1)LQLDCVAVPSSR	2	-0.26441	2	0.750795	0.850431	0.845521	1.39956	1.22883	1.06155
hsa04668 TNF signaling pathway	0.64	3	0.94	O00429	529	1.488	Up	0.00134434	S	Dynamin-1-like protein OS=Homo sapiens OX=9606 GN=DNM1L PE=1 SV=2	DNM1L	0.986969	0.00934587	51.726	ELPS(0.013)AVS(0.987)RDK	3	0.23539	1	0.887967	0.770217	0.800834	1.2387	1.15713	1.26294
hsa03420 Nucleotide excision repair	0.447309	3	1.23	P15927	238	1.486	Up	0.0087597	S	Replication protein A 32 kDa subunit OS=Homo sapiens OX=9606 GN=RPA2 PE=1 SV=1	RPA2	0.951327	0.00157633	74.424	HMS(0.951)VS(0.048)SIK	3	-0.12673	1	0.815488	0.819404	0.849462	1.23469	1.05844	1.39783
hsa03420 Nucleotide excision repair	0.447309	3	1.23	P27694	315	1.282	Up	0.00102158	S	Replication protein A 70 kDa DNA-binding subunit OS=Homo sapiens OX=9606 GN=RPA1 PE=1 SV=2	RPA1	0.814062	0.000116879	85.087	S(0.186)KDS(0.814)LVDIIGICK	3	0.14761	1	0.897824	0.859223	0.911992	1.14528	1.09372	1.18359
hsa03420 Nucleotide excision repair	0.447309	3	1.23	P27694	38	1.285	Up	0.046263	S	Replication protein A 70 kDa DNA-binding subunit OS=Homo sapiens OX=9606 GN=RPA1 PE=1 SV=2	RPA1	0.992594	0.000665856	77.597	PITT(0.007)GNS(0.993)PPR	2	1.8355	1	0.952696	0.852427	0.868472	1.33298	1.05751	1.04615
hsa03420 Nucleotide excision repair	0.447309	3	1.23	P51948	51	1.361	Up	0.0101225	T	CDK-activating kinase assembly factor MAT1 OS=Homo sapiens OX=9606 GN=MNAT1 PE=1 SV=1	MNAT1	1	0.0057931	61.821	GAGNCPECGT(1)PLRK	3	-1.0017	1	0.884692	0.78192	0.914176	1.2753	1.08342	1.15416
hsa03050 Proteasome	0.552512	2	1.12	P28066	56	1.218	Up	0.0030438	S	Proteasome subunit alpha type-5 OS=Homo sapiens OX=9606 GN=PSMA5 PE=1 SV=3	PSMA5	0.845801	1.78457e-12	152.94	IT(0.154)S(0.846)PLMEPSSIEK	3	-0.7029	2	0.8639	0.941234	0.907555	1.06927	1.13895	1.09697
hsa03050 Proteasome	0.552512	2	1.12	P55036	266	1.427	Up	0.001982	S	26S proteasome non-ATPase regulatory subunit 4 OS=Homo sapiens OX=9606 GN=PSMD4 PE=1 SV=1	PSMD4	0.964343	0.000553854	79.885	MT(0.036)IS(0.964)QQEFGR	2	-0.45011	2	0.770398	0.817097	0.905488	1.19193	1.21502	1.1513
hsa04740 Olfactory transduction	0.561346	1	1.3	P0DP25	102	1.304	Up	0.00041989	S	Calmodulin-3 OS=Homo sapiens OX=9606 GN=CALM3 PE=1 SV=1	CALM3	1	0.000220671	86.987	VFDKDGNGYIS(1)AAELR	3	0.004572	1	0.860182	0.856137	0.893194	1.17683	1.09606	1.12946
hsa04922 Glucagon signaling pathway	0.333917	6	1.27	P46020	758	1.592	Up	0.000138859	S	Phosphorylase b kinase regulatory subunit alpha, skeletal muscle isoform OS=Homo sapiens OX=9606 GN=PHKA1 PE=1 SV=2	PHKA1	1	0.000327631	94.717	DQS(1)GEVDFK	2	0.12455	1	0.760167	0.81092	0.762287	1.27316	1.26364	1.17833
hsa04922 Glucagon signaling pathway	0.333917	6	1.27	P0DP25	102	1.304	Up	0.00041989	S	Calmodulin-3 OS=Homo sapiens OX=9606 GN=CALM3 PE=1 SV=1	CALM3	1	0.000220671	86.987	VFDKDGNGYIS(1)AAELR	3	0.004572	1	0.860182	0.856137	0.893194	1.17683	1.09606	1.12946
hsa04922 Glucagon signaling pathway	0.333917	6	1.27	P17858	775	1.607	Up	0.0032178	S	ATP-dependent 6-phosphofructokinase, liver type OS=Homo sapiens OX=9606 GN=PFKL PE=1 SV=6	PFKL	0.998656	0.000204798	94.688	RT(0.001)LS(0.999)MDK	3	0.30762	2	0.890542	0.706861	0.730489	1.21954	1.21528	1.30616
hsa04922 Glucagon signaling pathway	0.333917	6	1.27	P17858	773	1.533	Up	0.00042209	T	ATP-dependent 6-phosphofructokinase, liver type OS=Homo sapiens OX=9606 GN=PFKL PE=1 SV=6	PFKL	0.939626	0.00104982	97.734	T(0.94)LS(0.06)MDKGF	2	0.77738	2	0.816153	0.79106	0.78564	1.27466	1.13234	1.26143
hsa04922 Glucagon signaling pathway	0.333917	6	1.27	Q13131	524	1.223	Up	0.041024	S	5'-AMP-activated protein kinase catalytic subunit alpha-1 OS=Homo sapiens OX=9606 GN=PRKAA1 PE=1 SV=4	PRKAA1	0.818051	1.36024e-07	120.05	SSEVS(0.001)LT(0.029)S(0.151)S(0.818)VT(0.007)S(0.991)LDS(0.002)SPVDLTPR	3	0.64002	3	0.820746	0.947162	0.923009	1.20225	1.07925	1.00904
hsa04922 Glucagon signaling pathway	0.333917	6	1.27	P13807	727	1.212	Up	0.036422	S	Glycogen [starch] synthase, muscle OS=Homo sapiens OX=9606 GN=GYS1 PE=1 SV=2	GYS1	0.907573	1.31659e-17	158.16	NSVDTATSSSLST(0.001)PS(0.008)EPLS(0.908)PT(0.055)S(0.012)S(0.017)LGEER	3	0.068497	1	0.805301	0.928736	0.980553	1.08566	1.05922	1.14395
hsa04922 Glucagon signaling pathway	0.333917	6	1.27	P14618	249	1.211	Up	0.035662	S	Pyruvate kinase PKM OS=Homo sapiens OX=9606 GN=PKM PE=1 SV=4	PKM	1	0.00129665	76.357	KAS(1)DVHEVR	4	-0.011322	2	0.89881	0.886026	0.946482	1.07614	1.22467	1.00798
hsa04722 Neurotrophin signaling pathway	0.775259	4	0.78	Q16539	180	2.17	Up	0.00035653	T	Mitogen-activated protein kinase 14 OS=Homo sapiens OX=9606 GN=MAPK14 PE=1 SV=3	MAPK14	0.999883	0.000118317	84.508	HTDDEMT(1)GY(0.998)VAT(0.002)R	3	0.46926	1	0.71334	0.660397	0.573296	1.46596	1.41754	1.34139
hsa04722 Neurotrophin signaling pathway	0.775259	4	0.78	Q16539	182	2.252	Up	3.8544e-05	Y	Mitogen-activated protein kinase 14 OS=Homo sapiens OX=9606 GN=MAPK14 PE=1 SV=3	MAPK14	0.998479	6.03326e-22	194.65	HTDDEMT(0.002)GY(0.998)VATR	2	0.15731	7	0.603595	0.666667	0.628385	1.48511	1.44154	1.34816
hsa04722 Neurotrophin signaling pathway	0.775259	4	0.78	P0DP25	102	1.304	Up	0.00041989	S	Calmodulin-3 OS=Homo sapiens OX=9606 GN=CALM3 PE=1 SV=1	CALM3	1	0.000220671	86.987	VFDKDGNGYIS(1)AAELR	3	0.004572	1	0.860182	0.856137	0.893194	1.17683	1.09606	1.12946
hsa04722 Neurotrophin signaling pathway	0.775259	4	0.78	Q13905	281	1.382	Up	0.0069764	S	Rap guanine nucleotide exchange factor 1 OS=Homo sapiens OX=9606 GN=RAPGEF1 PE=1 SV=3	RAPGEF1	1	2.3897e-05	89.311	VVDNS(1)PPPALPPK	3	-0.042345	1	0.796082	0.915334	0.862355	1.24175	1.07306	1.24134
hsa04722 Neurotrophin signaling pathway	0.775259	4	0.78	Q13905	360	1.27	Up	0.020205	S	Rap guanine nucleotide exchange factor 1 OS=Homo sapiens OX=9606 GN=RAPGEF1 PE=1 SV=3	RAPGEF1	0.996786	0.000871883	81.016	LS(0.003)KS(0.997)DEQLSSLDR	2	-1.5705	1	0.817453	0.998119	0.864013	1.16863	1.07743	1.15704
hsa04722 Neurotrophin signaling pathway	0.775259	4	0.78	Q13905	296	1.258	Up	0.035037	S	Rap guanine nucleotide exchange factor 1 OS=Homo sapiens OX=9606 GN=RAPGEF1 PE=1 SV=3	RAPGEF1	0.844786	0.010805	57.203	QS(0.002)APS(0.845)PT(0.153)R	2	0.60459	1	0.979519	0.914393	0.806799	1.19104	1.02944	1.17667
hsa04722 Neurotrophin signaling pathway	0.775259	4	0.78	Q15418	687	1.479	Up	0.0068244	S	Ribosomal protein S6 kinase alpha-1 OS=Homo sapiens OX=9606 GN=RPS6KA1 PE=1 SV=2	RPS6KA1	0.983875	1.52732e-05	105.51	DKLPQS(0.016)QLS(0.984)HQDLQLVK	4	-0.28314	1	0.866178	0.771154	0.807586	1.04921	1.26688	1.30104
hsa04218 Cellular senescence	0.802973	6	0.78	Q16539	180	2.17	Up	0.00035653	T	Mitogen-activated protein kinase 14 OS=Homo sapiens OX=9606 GN=MAPK14 PE=1 SV=3	MAPK14	0.999883	0.000118317	84.508	HTDDEMT(1)GY(0.998)VAT(0.002)R	3	0.46926	1	0.71334	0.660397	0.573296	1.46596	1.41754	1.34139
hsa04218 Cellular senescence	0.802973	6	0.78	Q16539	182	2.252	Up	3.8544e-05	Y	Mitogen-activated protein kinase 14 OS=Homo sapiens OX=9606 GN=MAPK14 PE=1 SV=3	MAPK14	0.998479	6.03326e-22	194.65	HTDDEMT(0.002)GY(0.998)VATR	2	0.15731	7	0.603595	0.666667	0.628385	1.48511	1.44154	1.34816
hsa04218 Cellular senescence	0.802973	6	0.78	P14921	26	1.554	Up	0.00063842	S	Protein C-ets-1 OS=Homo sapiens OX=9606 GN=ETS1 PE=1 SV=1	ETS1	0.999999	6.73664e-06	88.394	VDLELFPS(1)PDMECADVPLLTPSSK	3	-2.0065	3	0.819085	0.801205	0.74514	1.3102	1.20058	1.16435
hsa04218 Cellular senescence	0.802973	6	0.78	Q13535	1989	1.373	Up	0.0153005	T	Serine/threonine-protein kinase ATR OS=Homo sapiens OX=9606 GN=ATR PE=1 SV=3	ATR	1	4.00762e-07	123	GVELCFPENET(1)PPEGK	4	-0.42988	4	0.954796	0.745545	0.854271	1.24854	1.13439	1.12464
hsa04218 Cellular senescence	0.802973	6	0.78	P28749	964	1.43	Up	0.00127967	S	Retinoblastoma-like protein 1 OS=Homo sapiens OX=9606 GN=RBL1 PE=1 SV=3	RBL1	1	1.049e-07	120.13	YDLANQDHMMDAPPLS(1)PFPHIK	4	-0.86569	1	0.782369	0.834297	0.890748	1.14015	1.23392	1.21064
hsa04218 Cellular senescence	0.802973	6	0.78	O14757	317	1.573	Up	0.0181016	S	Serine/threonine-protein kinase Chk1 OS=Homo sapiens OX=9606 GN=CHEK1 PE=1 SV=2	CHEK1	0.979974	8.86255e-06	127.83	YSS(0.02)S(0.98)QPEPR	2	-0.08267	1	0.664557	0.95122	0.749726	1.28276	1.10736	1.33012
hsa04218 Cellular senescence	0.802973	6	0.78	P0DP25	102	1.304	Up	0.00041989	S	Calmodulin-3 OS=Homo sapiens OX=9606 GN=CALM3 PE=1 SV=1	CALM3	1	0.000220671	86.987	VFDKDGNGYIS(1)AAELR	3	0.004572	1	0.860182	0.856137	0.893194	1.17683	1.09606	1.12946
hsa04930 Type II diabetes mellitus	0.666991	1	0.98	P14618	249	1.211	Up	0.035662	S	Pyruvate kinase PKM OS=Homo sapiens OX=9606 GN=PKM PE=1 SV=4	PKM	1	0.00129665	76.357	KAS(1)DVHEVR	4	-0.011322	2	0.89881	0.886026	0.946482	1.07614	1.22467	1.00798
hsa04144 Endocytosis	0.188004	13	1.3	Q9UN37	99	1.215	Up	0.020362	S	Vacuolar protein sorting-associated protein 4A OS=Homo sapiens OX=9606 GN=VPS4A PE=1 SV=1	VPS4A	1	6.829e-28	201.18	GSDS(1)DS(1)EGDNPEK	2	0.21803	4	0.962428	0.935419	0.83619	1.07817	1.17414	1.0683
hsa04144 Endocytosis	0.188004	13	1.3	Q9UN37	97	1.205	Up	0.025835	S	Vacuolar protein sorting-associated protein 4A OS=Homo sapiens OX=9606 GN=VPS4A PE=1 SV=1	VPS4A	0.999897	2.60546e-36	218.83	ENQS(0.003)EGKGS(0.998)DS(1)DS(1)EGDNPEKK	4	0.081956	11	0.957611	0.937437	0.849524	1.05584	1.19082	1.06116
hsa04144 Endocytosis	0.188004	13	1.3	P61006	111	1.361	Up	0.0028797	S	Ras-related protein Rab-8A OS=Homo sapiens OX=9606 GN=RAB8A PE=1 SV=1	RAB8A	1	8.95918e-09	120.77	NIEEHAS(1)ADVEK	3	0.6417	3	0.922139	0.837624	0.815143	1.18374	1.21811	1.10375
hsa04144 Endocytosis	0.188004	13	1.3	P42566	796	1.558	Up	0.00129762	S	Epidermal growth factor receptor substrate 15 OS=Homo sapiens OX=9606 GN=EPS15 PE=1 SV=2	EPS15	1	0.000136838	83.792	LDS(1)PDPFK	3	-1.1027	4	0.851815	0.756447	0.762089	1.13623	1.26857	1.28803
hsa04144 Endocytosis	0.188004	13	1.3	P42566	851	1.473	Up	0.0023419	S	Epidermal growth factor receptor substrate 15 OS=Homo sapiens OX=9606 GN=EPS15 PE=1 SV=2	EPS15	0.944642	1.10765e-07	110.9	EADPSNFANFS(0.003)AY(0.052)PS(0.945)EEDMIEWAK	3	0.048064	1	0.796371	0.804202	0.846228	1.14834	1.33062	1.12576
hsa04144 Endocytosis	0.188004	13	1.3	Q6WKZ4	496	1.471	Up	0.044995	S	Rab11 family-interacting protein 1 OS=Homo sapiens OX=9606 GN=RAB11FIP1 PE=1 SV=3	RAB11FIP1	0.999999	0.00404128	65.695	DTAAVVS(1)R	2	-0.95341	1	0.754973	0.880801	0.85241	1.47694	1.21238	0.971487
hsa04144 Endocytosis	0.188004	13	1.3	Q6WKZ4	435	1.268	Up	0.039101	S	Rab11 family-interacting protein 1 OS=Homo sapiens OX=9606 GN=RAB11FIP1 PE=1 SV=3	RAB11FIP1	0.768354	1.09278e-12	154.81	RS(0.232)S(0.768)LLSLMTGK	3	-0.39097	2	0.820072	0.900819	0.960843	1.21372	1.19104	0.995927
hsa04144 Endocytosis	0.188004	13	1.3	Q9UBC2	575	1.227	Up	0.0182985	S	Epidermal growth factor receptor substrate 15-like 1 OS=Homo sapiens OX=9606 GN=EPS15L1 PE=1 SV=1	EPS15L1	0.938898	2.76681e-16	147.03	SLEQYDQVLDGAHGAS(0.939)LT(0.061)DLANLSEGVSLAER	4	-1.1905	1	0.83953	0.915014	0.952786	1.17771	1.11075	1.0334
hsa04144 Endocytosis	0.188004	13	1.3	P29590	8	1.375	Up	0.039518	S	Protein PML OS=Homo sapiens OX=9606 GN=PML PE=1 SV=3	PML	0.999756	1.41572e-05	73.239	S(1)PRPQQDPARPQEPTMPPPETPSEGR	4	-0.36428	1	0.983794	0.805985	0.776022	1.36013	1.0916	1.07614
hsa04144 Endocytosis	0.188004	13	1.3	Q9Y4E1	478	1.221	Up	0.0090004	S	WASH complex subunit 2C OS=Homo sapiens OX=9606 GN=WASHC2C PE=1 SV=4	WASHC2C	0.827199	1.96333e-15	160.67	KVQS(0.827)T(0.173)ADIFGDEEGDLFK	3	-0.13687	2	0.957157	0.879377	0.838586	1.05841	1.12259	1.08455
hsa04144 Endocytosis	0.188004	13	1.3	Q9BY43	196	1.51	Up	0.027722	S	Charged multivesicular body protein 4a OS=Homo sapiens OX=9606 GN=CHMP4A PE=1 SV=3	CHMP4A	0.795623	9.92339e-08	127.83	LPS(0.089)VPS(0.796)T(0.116)HLPAGPAPK	4	-0.19766	1	0.906924	0.723014	0.747515	1.18505	1.1933	1.21186
hsa04144 Endocytosis	0.188004	13	1.3	Q13596	188	1.256	Up	0.0162428	S	Sorting nexin-1 OS=Homo sapiens OX=9606 GN=SNX1 PE=1 SV=3	SNX1	1	7.20122e-06	107.51	RFS(1)DFLGLYEK	3	-0.36515	1	0.96701	0.806194	0.895753	1.14455	1.06578	1.14299
hsa04144 Endocytosis	0.188004	13	1.3	Q8N6H7	340	1.347	Up	0.0066032	S	ADP-ribosylation factor GTPase-activating protein 2 OS=Homo sapiens OX=9606 GN=ARFGAP2 PE=1 SV=1	ARFGAP2	0.999987	8.75075e-05	89.272	S(1)QLDLFDDVGTFASGPPK	3	-0.96009	2	0.930928	0.8431	0.800355	1.09623	1.13217	1.23991
hsa04144 Endocytosis	0.188004	13	1.3	P02786	34	1.775	Up	0.0023643	S	Transferrin receptor protein 1 OS=Homo sapiens OX=9606 GN=TFRC PE=1 SV=2	TFRC	1	8.18211e-06	99.747	QVDGDNS(1)HVEMK	3	-0.82969	1	0.637374	0.797571	0.744637	1.40239	1.29349	1.17362
hsa04144 Endocytosis	0.188004	13	1.3	Q96B97	79	1.229	Up	0.0091554	S	SH3 domain-containing kinase-binding protein 1 OS=Homo sapiens OX=9606 GN=SH3KBP1 PE=1 SV=2	SH3KBP1	0.999551	9.20763e-07	108.01	APEKPLHEVPS(1)GNSLLSSETILR	4	0.06358	7	0.969154	0.90261	0.858634	1.06448	1.12766	1.16409
hsa04144 Endocytosis	0.188004	13	1.3	O60749	119	1.299	Up	0.000136085	S	Sorting nexin-2 OS=Homo sapiens OX=9606 GN=SNX2 PE=1 SV=2	SNX2	0.979911	2.53155e-05	107.53	S(0.02)MS(0.98)APVIFDR	3	-1.1499	3	0.896104	0.860624	0.897516	1.14526	1.17383	1.12759
hsa04933 AGE-RAGE signaling pathway in diabetic complications	0.889871	1	0.49	Q16539	180	2.17	Up	0.00035653	T	Mitogen-activated protein kinase 14 OS=Homo sapiens OX=9606 GN=MAPK14 PE=1 SV=3	MAPK14	0.999883	0.000118317	84.508	HTDDEMT(1)GY(0.998)VAT(0.002)R	3	0.46926	1	0.71334	0.660397	0.573296	1.46596	1.41754	1.34139
hsa04933 AGE-RAGE signaling pathway in diabetic complications	0.889871	1	0.49	Q16539	182	2.252	Up	3.8544e-05	Y	Mitogen-activated protein kinase 14 OS=Homo sapiens OX=9606 GN=MAPK14 PE=1 SV=3	MAPK14	0.998479	6.03326e-22	194.65	HTDDEMT(0.002)GY(0.998)VATR	2	0.15731	7	0.603595	0.666667	0.628385	1.48511	1.44154	1.34816
hsa00330 Arginine and proline metabolism	0.23986	1	3.9	P51648	293	2.199	Up	0.024818	S	Fatty aldehyde dehydrogenase OS=Homo sapiens OX=9606 GN=ALDH3A2 PE=1 SV=1	ALDH3A2	1	0.0232812	40.727	ILS(1)LLEGQK	3	-0.47646	1	0.890503	0.609589	0.418217	1.23077	1.32709	1.66071
hsa04728 Dopaminergic synapse	0.89234	2	0.56	Q16539	180	2.17	Up	0.00035653	T	Mitogen-activated protein kinase 14 OS=Homo sapiens OX=9606 GN=MAPK14 PE=1 SV=3	MAPK14	0.999883	0.000118317	84.508	HTDDEMT(1)GY(0.998)VAT(0.002)R	3	0.46926	1	0.71334	0.660397	0.573296	1.46596	1.41754	1.34139
hsa04728 Dopaminergic synapse	0.89234	2	0.56	Q16539	182	2.252	Up	3.8544e-05	Y	Mitogen-activated protein kinase 14 OS=Homo sapiens OX=9606 GN=MAPK14 PE=1 SV=3	MAPK14	0.998479	6.03326e-22	194.65	HTDDEMT(0.002)GY(0.998)VATR	2	0.15731	7	0.603595	0.666667	0.628385	1.48511	1.44154	1.34816
hsa04728 Dopaminergic synapse	0.89234	2	0.56	P0DP25	102	1.304	Up	0.00041989	S	Calmodulin-3 OS=Homo sapiens OX=9606 GN=CALM3 PE=1 SV=1	CALM3	1	0.000220671	86.987	VFDKDGNGYIS(1)AAELR	3	0.004572	1	0.860182	0.856137	0.893194	1.17683	1.09606	1.12946
hsa04921 Oxytocin signaling pathway	0.757424	4	0.8	P13639	59	4.294	Up	2.4997e-05	T	Elongation factor 2 OS=Homo sapiens OX=9606 GN=EEF2 PE=1 SV=4	EEF2	1	3.81618e-07	118.62	FT(1)DT(1)RKDEQER	4	0.33427	2	0.376258	0.417683	0.37577	1.79113	1.74926	1.48241
hsa04921 Oxytocin signaling pathway	0.757424	4	0.8	P13639	57	1.952	Up	0.00022337	T	Elongation factor 2 OS=Homo sapiens OX=9606 GN=EEF2 PE=1 SV=4	EEF2	1	3.81618e-07	118.62	FT(1)DT(1)RKDEQER	4	0.33427	6	0.669014	0.735772	0.667351	1.37537	1.42914	1.24121
hsa04921 Oxytocin signaling pathway	0.757424	4	0.8	P0DP25	102	1.304	Up	0.00041989	S	Calmodulin-3 OS=Homo sapiens OX=9606 GN=CALM3 PE=1 SV=1	CALM3	1	0.000220671	86.987	VFDKDGNGYIS(1)AAELR	3	0.004572	1	0.860182	0.856137	0.893194	1.17683	1.09606	1.12946
hsa04921 Oxytocin signaling pathway	0.757424	4	0.8	Q13131	524	1.223	Up	0.041024	S	5'-AMP-activated protein kinase catalytic subunit alpha-1 OS=Homo sapiens OX=9606 GN=PRKAA1 PE=1 SV=4	PRKAA1	0.818051	1.36024e-07	120.05	SSEVS(0.001)LT(0.029)S(0.151)S(0.818)VT(0.007)S(0.991)LDS(0.002)SPVDLTPR	3	0.64002	3	0.820746	0.947162	0.923009	1.20225	1.07925	1.00904
hsa04921 Oxytocin signaling pathway	0.757424	4	0.8	O14974	871	1.287	Up	0.048356	S	Protein phosphatase 1 regulatory subunit 12A OS=Homo sapiens OX=9606 GN=PPP1R12A PE=1 SV=1	PPP1R12A	0.970474	5.92247e-68	268.3	STGVSFWTQDSDENEQEQQS(0.97)DT(0.029)EEGSNKK	4	-0.88047	1	0.846008	0.805634	0.976407	1.14407	1.12945	1.1093
hsa05221 Acute myeloid leukemia	0.748244	2	0.78	Q9UBS0	416	2.556	Up	0.00142006	S	Ribosomal protein S6 kinase beta-2 OS=Homo sapiens OX=9606 GN=RPS6KB2 PE=1 SV=2	RPS6KB2	0.994398	0.00771359	64.841	RLNS(0.994)S(0.006)PR	3	-0.54426	1	0.665977	0.612967	0.456459	1.3966	1.58972	1.4494
hsa05221 Acute myeloid leukemia	0.748244	2	0.78	P29590	8	1.375	Up	0.039518	S	Protein PML OS=Homo sapiens OX=9606 GN=PML PE=1 SV=3	PML	0.999756	1.41572e-05	73.239	S(1)PRPQQDPARPQEPTMPPPETPSEGR	4	-0.36428	1	0.983794	0.805985	0.776022	1.36013	1.0916	1.07614
hsa04514 Cell adhesion molecules (CAMs)	0.889871	1	0.49	P06729	347	1.348	Up	0.03564	S	T-cell surface antigen CD2 OS=Homo sapiens OX=9606 GN=CD2 PE=1 SV=2	CD2	0.887012	0.000130499	85.013	VQPKPPHGAAENS(0.113)LS(0.887)PSSN	3	-0.08739	1	0.817391	0.861395	0.922275	1.38073	1.06614	1.06061
hsa05010 Alzheimer disease	0.401024	4	1.25	P36542	146	1.326	Up	0.00186417	S	ATP synthase subunit gamma, mitochondrial OS=Homo sapiens OX=9606 GN=ATP5F1C PE=1 SV=1	ATP5F1C	0.848104	6.42345e-05	87.083	T(0.152)HS(0.848)DQFLVAFK	3	0.14265	1	0.803016	0.915907	0.860324	1.13105	1.15733	1.13043
hsa05010 Alzheimer disease	0.401024	4	1.25	P0DP25	102	1.304	Up	0.00041989	S	Calmodulin-3 OS=Homo sapiens OX=9606 GN=CALM3 PE=1 SV=1	CALM3	1	0.000220671	86.987	VFDKDGNGYIS(1)AAELR	3	0.004572	1	0.860182	0.856137	0.893194	1.17683	1.09606	1.12946
hsa05010 Alzheimer disease	0.401024	4	1.25	P06576	465	2.416	Up	1.69111e-05	S	ATP synthase subunit beta, mitochondrial OS=Homo sapiens OX=9606 GN=ATP5F1B PE=1 SV=3	ATP5F1B	0.999999	5.26017e-05	96.723	FLS(1)QPFQVAEVFTGHMGK	3	0.090395	2	0.623975	0.588008	0.587669	1.38215	1.52314	1.44229
hsa05010 Alzheimer disease	0.401024	4	1.25	Q9NQC3	107	1.325	Up	0.00047994	S	Reticulon-4 OS=Homo sapiens OX=9606 GN=RTN4 PE=1 SV=2	RTN4	0.839007	2.73294e-08	98.977	QPS(0.839)WDPS(0.161)PVSSTVPAPSPLSAAAVSPSK	3	0.089816	2	0.839885	0.898406	0.894949	1.12626	1.18079	1.18211
hsa05418 Fluid shear stress and atherosclerosis	0.277671	4	1.49	Q16539	180	2.17	Up	0.00035653	T	Mitogen-activated protein kinase 14 OS=Homo sapiens OX=9606 GN=MAPK14 PE=1 SV=3	MAPK14	0.999883	0.000118317	84.508	HTDDEMT(1)GY(0.998)VAT(0.002)R	3	0.46926	1	0.71334	0.660397	0.573296	1.46596	1.41754	1.34139
hsa05418 Fluid shear stress and atherosclerosis	0.277671	4	1.49	Q16539	182	2.252	Up	3.8544e-05	Y	Mitogen-activated protein kinase 14 OS=Homo sapiens OX=9606 GN=MAPK14 PE=1 SV=3	MAPK14	0.998479	6.03326e-22	194.65	HTDDEMT(0.002)GY(0.998)VATR	2	0.15731	7	0.603595	0.666667	0.628385	1.48511	1.44154	1.34816
hsa05418 Fluid shear stress and atherosclerosis	0.277671	4	1.49	P0DP25	102	1.304	Up	0.00041989	S	Calmodulin-3 OS=Homo sapiens OX=9606 GN=CALM3 PE=1 SV=1	CALM3	1	0.000220671	86.987	VFDKDGNGYIS(1)AAELR	3	0.004572	1	0.860182	0.856137	0.893194	1.17683	1.09606	1.12946
hsa05418 Fluid shear stress and atherosclerosis	0.277671	4	1.49	Q92974	142	1.316	Up	0.0051386	S	Rho guanine nucleotide exchange factor 2 OS=Homo sapiens OX=9606 GN=ARHGEF2 PE=1 SV=4	ARHGEF2	0.959925	0.00105538	72.731	S(0.96)S(0.036)LS(0.004)LAK	2	0.10198	2	0.930399	0.831207	0.87051	1.07615	1.16579	1.22119
hsa05418 Fluid shear stress and atherosclerosis	0.277671	4	1.49	Q92974	645	1.455	Up	0.029299	S	Rho guanine nucleotide exchange factor 2 OS=Homo sapiens OX=9606 GN=ARHGEF2 PE=1 SV=4	ARHGEF2	0.968061	5.9359e-05	123.79	S(0.006)ES(0.968)LES(0.026)PR	2	-0.32292	2	1	0.773307	0.724008	1.33066	1.08499	1.21914
hsa05418 Fluid shear stress and atherosclerosis	0.277671	4	1.49	Q13131	524	1.223	Up	0.041024	S	5'-AMP-activated protein kinase catalytic subunit alpha-1 OS=Homo sapiens OX=9606 GN=PRKAA1 PE=1 SV=4	PRKAA1	0.818051	1.36024e-07	120.05	SSEVS(0.001)LT(0.029)S(0.151)S(0.818)VT(0.007)S(0.991)LDS(0.002)SPVDLTPR	3	0.64002	3	0.820746	0.947162	0.923009	1.20225	1.07925	1.00904
hsa05132 Salmonella infection	0.772619	2	0.74	Q16539	180	2.17	Up	0.00035653	T	Mitogen-activated protein kinase 14 OS=Homo sapiens OX=9606 GN=MAPK14 PE=1 SV=3	MAPK14	0.999883	0.000118317	84.508	HTDDEMT(1)GY(0.998)VAT(0.002)R	3	0.46926	1	0.71334	0.660397	0.573296	1.46596	1.41754	1.34139
hsa05132 Salmonella infection	0.772619	2	0.74	Q16539	182	2.252	Up	3.8544e-05	Y	Mitogen-activated protein kinase 14 OS=Homo sapiens OX=9606 GN=MAPK14 PE=1 SV=3	MAPK14	0.998479	6.03326e-22	194.65	HTDDEMT(0.002)GY(0.998)VATR	2	0.15731	7	0.603595	0.666667	0.628385	1.48511	1.44154	1.34816
hsa05132 Salmonella infection	0.772619	2	0.74	P21333	1084	1.334	Up	0.0040447	S	Filamin-A OS=Homo sapiens OX=9606 GN=FLNA PE=1 SV=4	FLNA	0.999915	7.25433e-16	133.92	AFGPGLQGGSAGS(1)PAR	2	-0.31133	3	0.859571	0.874202	0.889823	1.26867	1.07805	1.15385
hsa05132 Salmonella infection	0.772619	2	0.74	P21333	1459	1.357	Up	0.03862	S	Filamin-A OS=Homo sapiens OX=9606 GN=FLNA PE=1 SV=4	FLNA	0.999994	3.24732e-06	107.69	CSGPGLS(1)PGMVR	2	-1.2437	1	0.855993	0.84412	0.907563	1.4136	1.06335	1.06176
hsa04917 Prolactin signaling pathway	0.833097	1	0.6	Q16539	180	2.17	Up	0.00035653	T	Mitogen-activated protein kinase 14 OS=Homo sapiens OX=9606 GN=MAPK14 PE=1 SV=3	MAPK14	0.999883	0.000118317	84.508	HTDDEMT(1)GY(0.998)VAT(0.002)R	3	0.46926	1	0.71334	0.660397	0.573296	1.46596	1.41754	1.34139
hsa04917 Prolactin signaling pathway	0.833097	1	0.6	Q16539	182	2.252	Up	3.8544e-05	Y	Mitogen-activated protein kinase 14 OS=Homo sapiens OX=9606 GN=MAPK14 PE=1 SV=3	MAPK14	0.998479	6.03326e-22	194.65	HTDDEMT(0.002)GY(0.998)VATR	2	0.15731	7	0.603595	0.666667	0.628385	1.48511	1.44154	1.34816
hsa05165 Human papillomavirus infection	0.626144	8	0.95	Q14160	1348	1.351	Up	0.035981	S	Protein scribble homolog OS=Homo sapiens OX=9606 GN=SCRIB PE=1 SV=4	SCRIB	0.93406	7.85925e-06	69.462	AFAAVPTSHPPEDAPAQPPT(0.03)PGPAAS(0.934)PEQLS(0.036)FR	4	0.36161	1	1.02405	0.768672	0.853239	1.10073	1.31064	1.16434
hsa05165 Human papillomavirus infection	0.626144	8	0.95	Q13535	1989	1.373	Up	0.0153005	T	Serine/threonine-protein kinase ATR OS=Homo sapiens OX=9606 GN=ATR PE=1 SV=3	ATR	1	4.00762e-07	123	GVELCFPENET(1)PPEGK	4	-0.42988	4	0.954796	0.745545	0.854271	1.24854	1.13439	1.12464
hsa05165 Human papillomavirus infection	0.626144	8	0.95	P28749	964	1.43	Up	0.00127967	S	Retinoblastoma-like protein 1 OS=Homo sapiens OX=9606 GN=RBL1 PE=1 SV=3	RBL1	1	1.049e-07	120.13	YDLANQDHMMDAPPLS(1)PFPHIK	4	-0.86569	1	0.782369	0.834297	0.890748	1.14015	1.23392	1.21064
hsa05165 Human papillomavirus infection	0.626144	8	0.95	P38606	384	1.207	Up	0.0072382	S	V-type proton ATPase catalytic subunit A OS=Homo sapiens OX=9606 GN=ATP6V1A PE=1 SV=2	ATP6V1A	0.999827	0.0229082	48.091	LAS(1)FYER	2	-0.11556	1	0.972755	0.890411	0.889642	1.06165	1.11256	1.14769
hsa05165 Human papillomavirus infection	0.626144	8	0.95	Q9UBS0	416	2.556	Up	0.00142006	S	Ribosomal protein S6 kinase beta-2 OS=Homo sapiens OX=9606 GN=RPS6KB2 PE=1 SV=2	RPS6KB2	0.994398	0.00771359	64.841	RLNS(0.994)S(0.006)PR	3	-0.54426	1	0.665977	0.612967	0.456459	1.3966	1.58972	1.4494
hsa05165 Human papillomavirus infection	0.626144	8	0.95	P14618	249	1.211	Up	0.035662	S	Pyruvate kinase PKM OS=Homo sapiens OX=9606 GN=PKM PE=1 SV=4	PKM	1	0.00129665	76.357	KAS(1)DVHEVR	4	-0.011322	2	0.89881	0.886026	0.946482	1.07614	1.22467	1.00798
hsa05165 Human papillomavirus infection	0.626144	8	0.95	Q15904	465	1.508	Up	0.02214	S	V-type proton ATPase subunit S1 OS=Homo sapiens OX=9606 GN=ATP6AP1 PE=1 SV=2	ATP6AP1	0.905009	0.00787348	58.172	GPT(0.056)IS(0.905)LT(0.039)QIV	2	-0.28731	1	0.829135	0.661563	0.976657	1.19661	1.21403	1.30917
hsa05165 Human papillomavirus infection	0.626144	8	0.95	Q05086	218	1.279	Up	0.025242	S	Ubiquitin-protein ligase E3A OS=Homo sapiens OX=9606 GN=UBE3A PE=1 SV=4	UBE3A	0.875411	2.94496e-11	137.52	IGDS(0.125)S(0.875)QGDNNLQK	2	-0.98208	2	0.903128	0.889336	0.892137	1.23535	1.1083	1.08964
hsa05168 Herpes simplex virus 1 infection	0.21407	10	1.32	Q13247	265	1.463	Up	0.02178	S	Serine/arginine-rich splicing factor 6 OS=Homo sapiens OX=9606 GN=SRSF6 PE=1 SV=2	SRSF6	0.989358	0.00075015	75.088	S(0.008)RS(0.989)KDEY(0.003)EK	3	-1.0533	2	0.954304	0.804025	0.715328	1.05819	1.2762	1.28504
hsa05168 Herpes simplex virus 1 infection	0.21407	10	1.32	Q13247	122	1.383	Up	0.0122776	S	Serine/arginine-rich splicing factor 6 OS=Homo sapiens OX=9606 GN=SRSF6 PE=1 SV=2	SRSF6	1	0.00511528	69.672	CS(1)WQDLK	2	0.35558	1	0.861849	0.871822	0.82586	1.33235	1.03918	1.16856
hsa05168 Herpes simplex virus 1 infection	0.21407	10	1.32	P84103	148	1.568	Up	0.00118151	S	Serine/arginine-rich splicing factor 3 OS=Homo sapiens OX=9606 GN=SRSF3 PE=1 SV=1	SRSF3	0.996778	0.0243829	40.941	NHKPS(0.997)RS(0.973)FS(0.03)R	3	0.18035	1	0.717112	0.791751	0.853319	1.2775	1.1858	1.23992
hsa05168 Herpes simplex virus 1 infection	0.21407	10	1.32	P84103	150	1.568	Up	0.00118151	S	Serine/arginine-rich splicing factor 3 OS=Homo sapiens OX=9606 GN=SRSF3 PE=1 SV=1	SRSF3	0.97314	0.0243829	40.941	NHKPS(0.997)RS(0.973)FS(0.03)R	3	0.18035	1	0.717112	0.791751	0.853319	1.2775	1.1858	1.23992
hsa05168 Herpes simplex virus 1 infection	0.21407	10	1.32	P29590	8	1.375	Up	0.039518	S	Protein PML OS=Homo sapiens OX=9606 GN=PML PE=1 SV=3	PML	0.999756	1.41572e-05	73.239	S(1)PRPQQDPARPQEPTMPPPETPSEGR	4	-0.36428	1	0.983794	0.805985	0.776022	1.36013	1.0916	1.07614
hsa05168 Herpes simplex virus 1 infection	0.21407	10	1.32	P51610	666	1.332	Up	0.00053727	S	Host cell factor 1 OS=Homo sapiens OX=9606 GN=HCFC1 PE=1 SV=2	HCFC1	0.944038	8.6337e-11	145.17	S(0.944)PIS(0.056)VPGGSALISNLGK	3	0.23872	1	0.900568	0.829622	0.868696	1.13249	1.13921	1.18927
hsa05168 Herpes simplex virus 1 infection	0.21407	10	1.32	Q07955	244	1.537	Up	0.0069441	S	Serine/arginine-rich splicing factor 1 OS=Homo sapiens OX=9606 GN=SRSF1 PE=1 SV=2	SRSF1	0.999924	0.0128483	44.598	Y(0.119)S(0.883)PRHS(0.998)RS(1)R	2	-0.53005	1	0.774226	0.811881	0.809909	1.23854	1.05152	1.39261
hsa05168 Herpes simplex virus 1 infection	0.21407	10	1.32	Q07955	225	2.163	Up	0.0064837	S	Serine/arginine-rich splicing factor 1 OS=Homo sapiens OX=9606 GN=SRSF1 PE=1 SV=2	SRSF1	0.976217	0.0394378	54.486	S(0.012)RS(0.976)Y(0.293)S(0.718)PR	2	0.34549	1	0.687313	0.684158	0.569262	1.39792	1.37778	1.42274
hsa05168 Herpes simplex virus 1 infection	0.21407	10	1.32	Q07955	242	1.255	Up	0.0161615	S	Serine/arginine-rich splicing factor 1 OS=Homo sapiens OX=9606 GN=SRSF1 PE=1 SV=2	SRSF1	1	0.00820291	80.245	Y(0.002)S(0.998)PRHS(1)R	2	0.30417	3	0.988012	0.877228	0.830131	1.15833	1.15455	1.07094
hsa05168 Herpes simplex virus 1 infection	0.21407	10	1.32	Q01130	221	1.307	Up	0.037441	S	Serine/arginine-rich splicing factor 2 OS=Homo sapiens OX=9606 GN=SRSF2 PE=1 SV=4	SRSF2	0.838082	1.24586e-10	136.34	S(0.402)KS(0.597)PPKSPEEEGAVS(0.162)S(0.838)	3	0.82607	5	0.723964	0.933182	0.93007	1.18999	1.07414	1.11674
hsa05168 Herpes simplex virus 1 infection	0.21407	10	1.32	Q01130	189	1.467	Up	0.00099751	S	Serine/arginine-rich splicing factor 2 OS=Homo sapiens OX=9606 GN=SRSF2 PE=1 SV=4	SRSF2	0.9998	0.000422351	72.583	S(1)RS(1)PPPVSK	3	-0.20792	6	0.751264	0.819932	0.842657	1.24652	1.15269	1.14118
hsa05168 Herpes simplex virus 1 infection	0.21407	10	1.32	Q01130	191	1.55	Up	0.00097626	S	Serine/arginine-rich splicing factor 2 OS=Homo sapiens OX=9606 GN=SRSF2 PE=1 SV=4	SRSF2	0.99986	0.000422351	76.24	S(1)RS(1)PPPVSK	3	-0.20792	9	0.710819	0.80521	0.814685	1.25487	1.2083	1.14842
hsa05168 Herpes simplex virus 1 infection	0.21407	10	1.32	Q01130	212	1.347	Up	0.0041551	S	Serine/arginine-rich splicing factor 2 OS=Homo sapiens OX=9606 GN=SRSF2 PE=1 SV=4	SRSF2	0.964854	4.75892e-07	116.74	S(0.72)KS(0.315)PPKS(0.965)PEEEGAVSS	3	-0.35778	2	0.782609	0.89128	0.867133	1.19462	1.15357	1.0733
hsa05168 Herpes simplex virus 1 infection	0.21407	10	1.32	Q01130	206	1.217	Up	0.018195	S	Serine/arginine-rich splicing factor 2 OS=Homo sapiens OX=9606 GN=SRSF2 PE=1 SV=4	SRSF2	0.959152	6.09525e-16	157.63	S(0.959)KS(0.924)PPKS(0.116)PEEEGAVS(0.26)S(0.74)	3	-0.23452	5	0.81092	0.942242	0.941725	1.09917	1.11386	1.06697
hsa05168 Herpes simplex virus 1 infection	0.21407	10	1.32	Q01130	208	1.797	Up	7.6507e-05	S	Serine/arginine-rich splicing factor 2 OS=Homo sapiens OX=9606 GN=SRSF2 PE=1 SV=4	SRSF2	0.993368	6.09525e-16	166.38	S(0.006)KS(0.993)PPKSPEEEGAVSS	2	-0.35453	7	0.661274	0.727067	0.726107	1.26784	1.23301	1.29955
hsa05168 Herpes simplex virus 1 infection	0.21407	10	1.32	Q16629	221	1.448	Up	0.0087644	S	Serine/arginine-rich splicing factor 7 OS=Homo sapiens OX=9606 GN=SRSF7 PE=1 SV=1	SRSF7	0.995765	0.0113031	46.318	RS(0.996)RS(0.985)PS(0.018)GS(0.002)PR	3	0.47115	2	0.840467	0.893814	0.735234	1.31124	1.16393	1.0999
hsa05168 Herpes simplex virus 1 infection	0.21407	10	1.32	Q16629	194	1.285	Up	0.0109956	S	Serine/arginine-rich splicing factor 7 OS=Homo sapiens OX=9606 GN=SRSF7 PE=1 SV=1	SRSF7	0.998158	0.00908409	50.324	YFQS(0.002)PS(0.998)R	2	0.70005	3	0.827821	0.920619	0.892057	1.22671	1.11885	1.04701
hsa05168 Herpes simplex virus 1 infection	0.21407	10	1.32	Q16629	198	1.314	Up	0.0049649	S	Serine/arginine-rich splicing factor 7 OS=Homo sapiens OX=9606 GN=SRSF7 PE=1 SV=1	SRSF7	0.997808	0.00312429	61.821	YFQS(0.533)PS(0.523)RS(0.946)RS(0.998)R	2	-0.54895	2	0.843385	0.902062	0.862525	1.24496	1.09631	1.08521
hsa05168 Herpes simplex virus 1 infection	0.21407	10	1.32	Q16629	192	1.472	Up	0.0002009	S	Serine/arginine-rich splicing factor 7 OS=Homo sapiens OX=9606 GN=SRSF7 PE=1 SV=1	SRSF7	0.974688	0.00232954	88.181	YFQS(0.975)PS(0.025)R	2	0.33598	3	0.842412	0.810309	0.792261	1.24784	1.14959	1.20176
hsa05168 Herpes simplex virus 1 infection	0.21407	10	1.32	Q16629	208	1.506	Up	0.021676	S	Serine/arginine-rich splicing factor 7 OS=Homo sapiens OX=9606 GN=SRSF7 PE=1 SV=1	SRSF7	0.996681	0.0305246	41.621	S(0.002)IS(0.002)RPRS(0.997)S(0.999)R	2	-0.33132	1	0.81323	0.753608	0.856415	1.15082	1.46516	1.03428
hsa05168 Herpes simplex virus 1 infection	0.21407	10	1.32	Q16629	209	1.506	Up	0.021676	S	Serine/arginine-rich splicing factor 7 OS=Homo sapiens OX=9606 GN=SRSF7 PE=1 SV=1	SRSF7	0.998657	0.0305246	41.621	S(0.002)IS(0.002)RPRS(0.997)S(0.999)R	2	-0.33132	1	0.81323	0.753608	0.856415	1.15082	1.46516	1.03428
hsa05168 Herpes simplex virus 1 infection	0.21407	10	1.32	Q16629	196	1.314	Up	0.0049649	S	Serine/arginine-rich splicing factor 7 OS=Homo sapiens OX=9606 GN=SRSF7 PE=1 SV=1	SRSF7	0.946291	0.00312429	61.821	YFQS(0.533)PS(0.523)RS(0.946)RS(0.998)R	2	-0.54895	2	0.843385	0.902062	0.862525	1.24496	1.09631	1.08521
hsa05168 Herpes simplex virus 1 infection	0.21407	10	1.32	Q16629	223	1.532	Up	0.0059397	S	Serine/arginine-rich splicing factor 7 OS=Homo sapiens OX=9606 GN=SRSF7 PE=1 SV=1	SRSF7	0.984515	0.0113031	46.318	RS(0.996)RS(0.985)PS(0.018)GS(0.002)PR	3	0.47115	2	0.783074	0.826804	0.780041	1.41402	1.12398	1.12341
hsa05168 Herpes simplex virus 1 infection	0.21407	10	1.32	A6NFI3	10	1.211	Up	0.045741	S	Zinc finger protein 316 OS=Homo sapiens OX=9606 GN=ZNF316 PE=1 SV=1	ZNF316	0.96477	0.000129664	94.188	AALHT(0.018)T(0.018)PDS(0.965)PAAQLER	3	0.037241	4	0.941777	0.938756	0.857919	1.23003	1.00818	1.07788
hsa05168 Herpes simplex virus 1 infection	0.21407	10	1.32	P27797	195	1.462	Up	0.0035425	S	Calreticulin OS=Homo sapiens OX=9606 GN=CALR PE=1 SV=1	CALR	0.993692	1.82952e-08	129.72	IDNSQVES(0.006)GS(0.994)LEDDWDFLPPKK	4	0.20133	2	0.80226	0.76992	0.902439	1.28173	1.2166	1.11912
hsa05168 Herpes simplex virus 1 infection	0.21407	10	1.32	Q13243	233	1.321	Up	0.00073915	S	Serine/arginine-rich splicing factor 5 OS=Homo sapiens OX=9606 GN=SRSF5 PE=1 SV=1	SRSF5	0.998448	0.00934588	51.726	S(0.103)VS(0.899)RS(0.998)PVPEK	2	1.6535	2	0.901829	0.85446	0.860534	1.20374	1.14706	1.10583
hsa04670 Leukocyte transendothelial migration	0.879814	2	0.58	Q16539	180	2.17	Up	0.00035653	T	Mitogen-activated protein kinase 14 OS=Homo sapiens OX=9606 GN=MAPK14 PE=1 SV=3	MAPK14	0.999883	0.000118317	84.508	HTDDEMT(1)GY(0.998)VAT(0.002)R	3	0.46926	1	0.71334	0.660397	0.573296	1.46596	1.41754	1.34139
hsa04670 Leukocyte transendothelial migration	0.879814	2	0.58	Q16539	182	2.252	Up	3.8544e-05	Y	Mitogen-activated protein kinase 14 OS=Homo sapiens OX=9606 GN=MAPK14 PE=1 SV=3	MAPK14	0.998479	6.03326e-22	194.65	HTDDEMT(0.002)GY(0.998)VATR	2	0.15731	7	0.603595	0.666667	0.628385	1.48511	1.44154	1.34816
hsa04670 Leukocyte transendothelial migration	0.879814	2	0.58	P19105	18	1.605	Up	0.000183171	T	Myosin regulatory light chain 12A OS=Homo sapiens OX=9606 GN=MYL12A PE=1 SV=2	MYL12A	1	4.14264e-31	198.67	AT(1)S(1)NVFAMFDQSQIQEFK	3	-1.5076	12	0.768317	0.748357	0.82846	1.30126	1.23173	1.22992
hsa04670 Leukocyte transendothelial migration	0.879814	2	0.58	P19105	19	1.359	Up	5.7321e-05	S	Myosin regulatory light chain 12A OS=Homo sapiens OX=9606 GN=MYL12A PE=1 SV=2	MYL12A	1	3.22787e-64	273.37	AT(1)S(1)NVFAMFDQSQIQEFK	3	-1.5076	20	0.858416	0.841315	0.871345	1.16632	1.19102	1.13655
hsa04137 Mitophagy - animal	0.958416	1	0.34	P60520	10	1.463	Up	0.023264	S	Gamma-aminobutyric acid receptor-associated protein-like 2 OS=Homo sapiens OX=9606 GN=GABARAPL2 PE=1 SV=1	GABARAPL2	1	0.000694321	89.171	EDHS(1)LEHR	3	0.29567	1	0.751445	0.85458	0.882114	1	1.31208	1.32753
hsa00340 Histidine metabolism	0.128093	1	7.81	P51648	293	2.199	Up	0.024818	S	Fatty aldehyde dehydrogenase OS=Homo sapiens OX=9606 GN=ALDH3A2 PE=1 SV=1	ALDH3A2	1	0.0232812	40.727	ILS(1)LLEGQK	3	-0.47646	1	0.890503	0.609589	0.418217	1.23077	1.32709	1.66071
hsa00270 Cysteine and methionine metabolism	0.666991	1	0.98	Q96GX9	87	1.21	Up	0.0062961	S	Methylthioribulose-1-phosphate dehydratase OS=Homo sapiens OX=9606 GN=APIP PE=1 SV=1	APIP	0.998477	2.65498e-31	200.79	DISGPS(0.998)PS(0.001)K	3	0.15167	8	0.857545	0.906439	0.95825	1.08603	1.07269	1.13603
hsa04658 Th1 and Th2 cell differentiation	0.5496	3	1.06	Q16539	180	2.17	Up	0.00035653	T	Mitogen-activated protein kinase 14 OS=Homo sapiens OX=9606 GN=MAPK14 PE=1 SV=3	MAPK14	0.999883	0.000118317	84.508	HTDDEMT(1)GY(0.998)VAT(0.002)R	3	0.46926	1	0.71334	0.660397	0.573296	1.46596	1.41754	1.34139
hsa04658 Th1 and Th2 cell differentiation	0.5496	3	1.06	Q16539	182	2.252	Up	3.8544e-05	Y	Mitogen-activated protein kinase 14 OS=Homo sapiens OX=9606 GN=MAPK14 PE=1 SV=3	MAPK14	0.998479	6.03326e-22	194.65	HTDDEMT(0.002)GY(0.998)VATR	2	0.15731	7	0.603595	0.666667	0.628385	1.48511	1.44154	1.34816
hsa04658 Th1 and Th2 cell differentiation	0.5496	3	1.06	P43403	106	1.203	Up	0.036162	S	Tyrosine-protein kinase ZAP-70 OS=Homo sapiens OX=9606 GN=ZAP70 PE=1 SV=1	ZAP70	1	0.000234608	67.496	KPCNRPS(1)GLEPQPGVFDCLR	4	0.29141	1	0.872816	0.993097	0.896065	1.15692	1.15456	1.01118
hsa04658 Th1 and Th2 cell differentiation	0.5496	3	1.06	P06239	158	1.297	Up	0.0058213	S	Tyrosine-protein kinase Lck OS=Homo sapiens OX=9606 GN=LCK PE=1 SV=6	LCK	0.899898	0.000522489	77.795	ES(0.021)ES(0.9)T(0.078)AGS(0.001)FSLSVR	2	-0.78547	1	0.796709	0.889423	0.924453	1.15988	1.13996	1.08577
hsa04658 Th1 and Th2 cell differentiation	0.5496	3	1.06	P06239	394	1.225	Up	0.00126248	Y	Tyrosine-protein kinase Lck OS=Homo sapiens OX=9606 GN=LCK PE=1 SV=6	LCK	0.993133	5.27585e-10	153.34	LIEDNEY(0.993)T(0.007)AR	3	0.54142	3	0.893514	0.927885	0.865805	1.0854	1.13083	1.07669
hsa04658 Th1 and Th2 cell differentiation	0.5496	3	1.06	P06239	505	1.276	Up	0.037598	Y	Tyrosine-protein kinase Lck OS=Homo sapiens OX=9606 GN=LCK PE=1 SV=6	LCK	0.999913	6.68754e-17	174.62	SVLEDFFTATEGQY(1)QPQP	2	-0.57314	3	1.00194	0.791346	0.847913	1.19067	1.13996	1.03935
hsa05164 Influenza A	0.951347	2	0.45	P25685	149	1.776	Up	0.0093847	S	DnaJ homolog subfamily B member 1 OS=Homo sapiens OX=9606 GN=DNAJB1 PE=1 SV=4	DNAJB1	0.940868	0.00109496	83.53	S(0.941)RS(0.059)AQEPAR	2	-0.12926	2	0.888889	0.718447	0.600791	1.44513	1.22188	1.25431
hsa05164 Influenza A	0.951347	2	0.45	P29590	8	1.375	Up	0.039518	S	Protein PML OS=Homo sapiens OX=9606 GN=PML PE=1 SV=3	PML	0.999756	1.41572e-05	73.239	S(1)PRPQQDPARPQEPTMPPPETPSEGR	4	-0.36428	1	0.983794	0.805985	0.776022	1.36013	1.0916	1.07614
hsa05212 Pancreatic cancer	0.963833	1	0.33	Q9UBS0	416	2.556	Up	0.00142006	S	Ribosomal protein S6 kinase beta-2 OS=Homo sapiens OX=9606 GN=RPS6KB2 PE=1 SV=2	RPS6KB2	0.994398	0.00771359	64.841	RLNS(0.994)S(0.006)PR	3	-0.54426	1	0.665977	0.612967	0.456459	1.3966	1.58972	1.4494
hsa05163 Human cytomegalovirus infection	0.570278	8	0.99	Q16539	180	2.17	Up	0.00035653	T	Mitogen-activated protein kinase 14 OS=Homo sapiens OX=9606 GN=MAPK14 PE=1 SV=3	MAPK14	0.999883	0.000118317	84.508	HTDDEMT(1)GY(0.998)VAT(0.002)R	3	0.46926	1	0.71334	0.660397	0.573296	1.46596	1.41754	1.34139
hsa05163 Human cytomegalovirus infection	0.570278	8	0.99	Q16539	182	2.252	Up	3.8544e-05	Y	Mitogen-activated protein kinase 14 OS=Homo sapiens OX=9606 GN=MAPK14 PE=1 SV=3	MAPK14	0.998479	6.03326e-22	194.65	HTDDEMT(0.002)GY(0.998)VATR	2	0.15731	7	0.603595	0.666667	0.628385	1.48511	1.44154	1.34816
hsa05163 Human cytomegalovirus infection	0.570278	8	0.99	Q13546	320	1.508	Up	0.0105427	S	Receptor-interacting serine/threonine-protein kinase 1 OS=Homo sapiens OX=9606 GN=RIPK1 PE=1 SV=3	RIPK1	1	6.96758e-05	92.289	MQS(1)LQLDCVAVPSSR	2	-0.26441	2	0.750795	0.850431	0.845521	1.39956	1.22883	1.06155
hsa05163 Human cytomegalovirus infection	0.570278	8	0.99	Q9NZN5	736	1.276	Up	0.0105604	T	Rho guanine nucleotide exchange factor 12 OS=Homo sapiens OX=9606 GN=ARHGEF12 PE=1 SV=1	ARHGEF12	0.992543	0.000558217	67.234	VT(0.007)EHGT(0.993)PKPFR	4	-0.24544	1	0.852473	0.908913	0.901341	1.02703	1.15762	1.21173
hsa05163 Human cytomegalovirus infection	0.570278	8	0.99	P0DP25	102	1.304	Up	0.00041989	S	Calmodulin-3 OS=Homo sapiens OX=9606 GN=CALM3 PE=1 SV=1	CALM3	1	0.000220671	86.987	VFDKDGNGYIS(1)AAELR	3	0.004572	1	0.860182	0.856137	0.893194	1.17683	1.09606	1.12946
hsa05163 Human cytomegalovirus infection	0.570278	8	0.99	Q12802	2563	1.343	Up	0.005404	S	A-kinase anchor protein 13 OS=Homo sapiens OX=9606 GN=AKAP13 PE=1 SV=2	AKAP13	0.853461	0.0119284	48.711	S(0.097)LS(0.853)RPS(0.025)S(0.025)LIEQEK	3	0.27327	1	0.896848	0.872763	0.818957	1.24455	1.16923	1.06156
hsa05163 Human cytomegalovirus infection	0.570278	8	0.99	Q12802	1559	1.319	Up	0.00089534	S	A-kinase anchor protein 13 OS=Homo sapiens OX=9606 GN=AKAP13 PE=1 SV=2	AKAP13	0.994294	0.0226563	49.715	S(0.006)LS(0.994)PFRR	3	-0.081392	1	0.909265	0.883698	0.819905	1.13663	1.15385	1.15659
hsa05163 Human cytomegalovirus infection	0.570278	8	0.99	Q92888	631	1.272	Up	0.00176281	S	Rho guanine nucleotide exchange factor 1 OS=Homo sapiens OX=9606 GN=ARHGEF1 PE=1 SV=2	ARHGEF1	0.989151	2.22082e-07	127.66	QS(0.011)S(0.989)DPMLSEFK	2	-0.053489	4	0.914454	0.886429	0.872137	1.20042	1.10505	1.09499
hsa05163 Human cytomegalovirus infection	0.570278	8	0.99	P27797	195	1.462	Up	0.0035425	S	Calreticulin OS=Homo sapiens OX=9606 GN=CALR PE=1 SV=1	CALR	0.993692	1.82952e-08	129.72	IDNSQVES(0.006)GS(0.994)LEDDWDFLPPKK	4	0.20133	2	0.80226	0.76992	0.902439	1.28173	1.2166	1.11912
hsa05163 Human cytomegalovirus infection	0.570278	8	0.99	Q9UBS0	416	2.556	Up	0.00142006	S	Ribosomal protein S6 kinase beta-2 OS=Homo sapiens OX=9606 GN=RPS6KB2 PE=1 SV=2	RPS6KB2	0.994398	0.00771359	64.841	RLNS(0.994)S(0.006)PR	3	-0.54426	1	0.665977	0.612967	0.456459	1.3966	1.58972	1.4494
hsa04723 Retrograde endocannabinoid signaling	0.779909	1	0.71	Q16539	180	2.17	Up	0.00035653	T	Mitogen-activated protein kinase 14 OS=Homo sapiens OX=9606 GN=MAPK14 PE=1 SV=3	MAPK14	0.999883	0.000118317	84.508	HTDDEMT(1)GY(0.998)VAT(0.002)R	3	0.46926	1	0.71334	0.660397	0.573296	1.46596	1.41754	1.34139
hsa04723 Retrograde endocannabinoid signaling	0.779909	1	0.71	Q16539	182	2.252	Up	3.8544e-05	Y	Mitogen-activated protein kinase 14 OS=Homo sapiens OX=9606 GN=MAPK14 PE=1 SV=3	MAPK14	0.998479	6.03326e-22	194.65	HTDDEMT(0.002)GY(0.998)VATR	2	0.15731	7	0.603595	0.666667	0.628385	1.48511	1.44154	1.34816
hsa03440 Homologous recombination	0.692793	2	0.87	P15927	238	1.486	Up	0.0087597	S	Replication protein A 32 kDa subunit OS=Homo sapiens OX=9606 GN=RPA2 PE=1 SV=1	RPA2	0.951327	0.00157633	74.424	HMS(0.951)VS(0.048)SIK	3	-0.12673	1	0.815488	0.819404	0.849462	1.23469	1.05844	1.39783
hsa03440 Homologous recombination	0.692793	2	0.87	P27694	315	1.282	Up	0.00102158	S	Replication protein A 70 kDa DNA-binding subunit OS=Homo sapiens OX=9606 GN=RPA1 PE=1 SV=2	RPA1	0.814062	0.000116879	85.087	S(0.186)KDS(0.814)LVDIIGICK	3	0.14761	1	0.897824	0.859223	0.911992	1.14528	1.09372	1.18359
hsa03440 Homologous recombination	0.692793	2	0.87	P27694	38	1.285	Up	0.046263	S	Replication protein A 70 kDa DNA-binding subunit OS=Homo sapiens OX=9606 GN=RPA1 PE=1 SV=2	RPA1	0.992594	0.000665856	77.597	PITT(0.007)GNS(0.993)PPR	2	1.8355	1	0.952696	0.852427	0.868472	1.33298	1.05751	1.04615
hsa05133 Pertussis	0.125717	3	2.34	Q16539	180	2.17	Up	0.00035653	T	Mitogen-activated protein kinase 14 OS=Homo sapiens OX=9606 GN=MAPK14 PE=1 SV=3	MAPK14	0.999883	0.000118317	84.508	HTDDEMT(1)GY(0.998)VAT(0.002)R	3	0.46926	1	0.71334	0.660397	0.573296	1.46596	1.41754	1.34139
hsa05133 Pertussis	0.125717	3	2.34	Q16539	182	2.252	Up	3.8544e-05	Y	Mitogen-activated protein kinase 14 OS=Homo sapiens OX=9606 GN=MAPK14 PE=1 SV=3	MAPK14	0.998479	6.03326e-22	194.65	HTDDEMT(0.002)GY(0.998)VATR	2	0.15731	7	0.603595	0.666667	0.628385	1.48511	1.44154	1.34816
hsa05133 Pertussis	0.125717	3	2.34	P23528	24	1.216	Up	0.047341	S	Cofilin-1 OS=Homo sapiens OX=9606 GN=CFL1 PE=1 SV=3	CFL1	0.789751	0.00949448	57.225	KS(0.172)S(0.79)T(0.039)PEEVK	2	-0.81102	1	0.850679	0.883504	1.00487	1.21468	1.07945	1.03696
hsa05133 Pertussis	0.125717	3	2.34	P0DP25	102	1.304	Up	0.00041989	S	Calmodulin-3 OS=Homo sapiens OX=9606 GN=CALM3 PE=1 SV=1	CALM3	1	0.000220671	86.987	VFDKDGNGYIS(1)AAELR	3	0.004572	1	0.860182	0.856137	0.893194	1.17683	1.09606	1.12946
hsa04657 IL-17 signaling pathway	0.661502	2	0.92	Q16539	180	2.17	Up	0.00035653	T	Mitogen-activated protein kinase 14 OS=Homo sapiens OX=9606 GN=MAPK14 PE=1 SV=3	MAPK14	0.999883	0.000118317	84.508	HTDDEMT(1)GY(0.998)VAT(0.002)R	3	0.46926	1	0.71334	0.660397	0.573296	1.46596	1.41754	1.34139
hsa04657 IL-17 signaling pathway	0.661502	2	0.92	Q16539	182	2.252	Up	3.8544e-05	Y	Mitogen-activated protein kinase 14 OS=Homo sapiens OX=9606 GN=MAPK14 PE=1 SV=3	MAPK14	0.998479	6.03326e-22	194.65	HTDDEMT(0.002)GY(0.998)VATR	2	0.15731	7	0.603595	0.666667	0.628385	1.48511	1.44154	1.34816
hsa04657 IL-17 signaling pathway	0.661502	2	0.92	Q07955	244	1.537	Up	0.0069441	S	Serine/arginine-rich splicing factor 1 OS=Homo sapiens OX=9606 GN=SRSF1 PE=1 SV=2	SRSF1	0.999924	0.0128483	44.598	Y(0.119)S(0.883)PRHS(0.998)RS(1)R	2	-0.53005	1	0.774226	0.811881	0.809909	1.23854	1.05152	1.39261
hsa04657 IL-17 signaling pathway	0.661502	2	0.92	Q07955	225	2.163	Up	0.0064837	S	Serine/arginine-rich splicing factor 1 OS=Homo sapiens OX=9606 GN=SRSF1 PE=1 SV=2	SRSF1	0.976217	0.0394378	54.486	S(0.012)RS(0.976)Y(0.293)S(0.718)PR	2	0.34549	1	0.687313	0.684158	0.569262	1.39792	1.37778	1.42274
hsa04657 IL-17 signaling pathway	0.661502	2	0.92	Q07955	242	1.255	Up	0.0161615	S	Serine/arginine-rich splicing factor 1 OS=Homo sapiens OX=9606 GN=SRSF1 PE=1 SV=2	SRSF1	1	0.00820291	80.245	Y(0.002)S(0.998)PRHS(1)R	2	0.30417	3	0.988012	0.877228	0.830131	1.15833	1.15455	1.07094
hsa04064 NF-kappa B signaling pathway	0.611323	3	0.98	Q13546	320	1.508	Up	0.0105427	S	Receptor-interacting serine/threonine-protein kinase 1 OS=Homo sapiens OX=9606 GN=RIPK1 PE=1 SV=3	RIPK1	1	6.96758e-05	92.289	MQS(1)LQLDCVAVPSSR	2	-0.26441	2	0.750795	0.850431	0.845521	1.39956	1.22883	1.06155
hsa04064 NF-kappa B signaling pathway	0.611323	3	0.98	P43403	106	1.203	Up	0.036162	S	Tyrosine-protein kinase ZAP-70 OS=Homo sapiens OX=9606 GN=ZAP70 PE=1 SV=1	ZAP70	1	0.000234608	67.496	KPCNRPS(1)GLEPQPGVFDCLR	4	0.29141	1	0.872816	0.993097	0.896065	1.15692	1.15456	1.01118
hsa04064 NF-kappa B signaling pathway	0.611323	3	0.98	P06239	158	1.297	Up	0.0058213	S	Tyrosine-protein kinase Lck OS=Homo sapiens OX=9606 GN=LCK PE=1 SV=6	LCK	0.899898	0.000522489	77.795	ES(0.021)ES(0.9)T(0.078)AGS(0.001)FSLSVR	2	-0.78547	1	0.796709	0.889423	0.924453	1.15988	1.13996	1.08577
hsa04064 NF-kappa B signaling pathway	0.611323	3	0.98	P06239	394	1.225	Up	0.00126248	Y	Tyrosine-protein kinase Lck OS=Homo sapiens OX=9606 GN=LCK PE=1 SV=6	LCK	0.993133	5.27585e-10	153.34	LIEDNEY(0.993)T(0.007)AR	3	0.54142	3	0.893514	0.927885	0.865805	1.0854	1.13083	1.07669
hsa04064 NF-kappa B signaling pathway	0.611323	3	0.98	P06239	505	1.276	Up	0.037598	Y	Tyrosine-protein kinase Lck OS=Homo sapiens OX=9606 GN=LCK PE=1 SV=6	LCK	0.999913	6.68754e-17	174.62	SVLEDFFTATEGQY(1)QPQP	2	-0.57314	3	1.00194	0.791346	0.847913	1.19067	1.13996	1.03935
hsa04120 Ubiquitin mediated proteolysis	0.757424	4	0.8	Q12834	59	1.359	Up	0.0001152	T	Cell division cycle protein 20 homolog OS=Homo sapiens OX=9606 GN=CDC20 PE=1 SV=2	CDC20	0.998818	0.0182197	47.894	T(0.001)PGRT(0.999)PGK	3	0.14876	2	0.844011	0.888458	0.845513	1.17898	1.18238	1.14159
hsa04120 Ubiquitin mediated proteolysis	0.757424	4	0.8	Q12834	106	1.423	Up	0.0118045	T	Cell division cycle protein 20 homolog OS=Homo sapiens OX=9606 GN=CDC20 PE=1 SV=2	CDC20	0.958264	3.66038e-08	124.5	ENQPENS(0.003)QT(0.958)PT(0.039)KK	4	0.31123	3	0.847725	0.85257	0.814986	1.07076	1.12746	1.38164
hsa04120 Ubiquitin mediated proteolysis	0.757424	4	0.8	Q12834	70	1.386	Up	0.007641	T	Cell division cycle protein 20 homolog OS=Homo sapiens OX=9606 GN=CDC20 PE=1 SV=2	CDC20	0.891078	2.53554e-11	153.2	VQT(0.105)T(0.891)PS(0.004)KPGGDR	2	0.20885	3	0.866295	0.916586	0.767808	1.14152	1.12021	1.27434
hsa04120 Ubiquitin mediated proteolysis	0.757424	4	0.8	Q12834	41	1.445	Up	0.0044796	S	Cell division cycle protein 20 homolog OS=Homo sapiens OX=9606 GN=CDC20 PE=1 SV=2	CDC20	1	0.000282221	82.663	EAAGPAPS(1)PMR	2	0.08506	1	0.910864	0.798254	0.790009	1.18106	1.12332	1.30642
hsa04120 Ubiquitin mediated proteolysis	0.757424	4	0.8	P63208	131	1.367	Up	0.00020489	T	S-phase kinase-associated protein 1 OS=Homo sapiens OX=9606 GN=SKP1 PE=1 SV=2	SKP1	1	0.00750675	61.344	GKT(1)PEEIRK	4	0.0066299	4	0.869648	0.863501	0.813084	1.14462	1.14822	1.18687
hsa04120 Ubiquitin mediated proteolysis	0.757424	4	0.8	P29590	8	1.375	Up	0.039518	S	Protein PML OS=Homo sapiens OX=9606 GN=PML PE=1 SV=3	PML	0.999756	1.41572e-05	73.239	S(1)PRPQQDPARPQEPTMPPPETPSEGR	4	-0.36428	1	0.983794	0.805985	0.776022	1.36013	1.0916	1.07614
hsa04120 Ubiquitin mediated proteolysis	0.757424	4	0.8	Q05086	218	1.279	Up	0.025242	S	Ubiquitin-protein ligase E3A OS=Homo sapiens OX=9606 GN=UBE3A PE=1 SV=4	UBE3A	0.875411	2.94496e-11	137.52	IGDS(0.125)S(0.875)QGDNNLQK	2	-0.98208	2	0.903128	0.889336	0.892137	1.23535	1.1083	1.08964
hsa00280 Valine, leucine and isoleucine degradation	0.0821784	2	3.9	P12694	347	1.298	Up	0.00042319	S	2-oxoisovalerate dehydrogenase subunit alpha, mitochondrial OS=Homo sapiens OX=9606 GN=BCKDHA PE=1 SV=2	BCKDHA	1	1.12243e-16	178.23	S(1)VDEVNYWDK	2	0.65946	4	0.894587	0.881592	0.853831	1.09305	1.16531	1.15438
hsa00280 Valine, leucine and isoleucine degradation	0.0821784	2	3.9	P51648	293	2.199	Up	0.024818	S	Fatty aldehyde dehydrogenase OS=Homo sapiens OX=9606 GN=ALDH3A2 PE=1 SV=1	ALDH3A2	1	0.0232812	40.727	ILS(1)LLEGQK	3	-0.47646	1	0.890503	0.609589	0.418217	1.23077	1.32709	1.66071
hsa05216 Thyroid cancer	0.779909	1	0.71	P12270	2155	1.372	Up	0.0013171	S	Nucleoprotein TPR OS=Homo sapiens OX=9606 GN=TPR PE=1 SV=3	TPR	1	9.31754e-16	167.87	TDGFAEAIHS(1)PQVAGVPR	2	-0.28406	2	0.891304	0.852036	0.825121	1.25226	1.13992	1.13264
hsa05216 Thyroid cancer	0.779909	1	0.71	P12270	2137	2.066	Up	0.00061722	T	Nucleoprotein TPR OS=Homo sapiens OX=9606 GN=TPR PE=1 SV=3	TPR	0.939872	3.75324e-05	88.987	TVPS(0.039)T(0.94)PT(0.021)LVVPHR	3	-0.23909	2	0.655138	0.595829	0.763285	1.40905	1.41872	1.33368
hsa04350 TGF-beta signaling pathway	0.226288	3	1.8	P63208	131	1.367	Up	0.00020489	T	S-phase kinase-associated protein 1 OS=Homo sapiens OX=9606 GN=SKP1 PE=1 SV=2	SKP1	1	0.00750675	61.344	GKT(1)PEEIRK	4	0.0066299	4	0.869648	0.863501	0.813084	1.14462	1.14822	1.18687
hsa04350 TGF-beta signaling pathway	0.226288	3	1.8	P28749	964	1.43	Up	0.00127967	S	Retinoblastoma-like protein 1 OS=Homo sapiens OX=9606 GN=RBL1 PE=1 SV=3	RBL1	1	1.049e-07	120.13	YDLANQDHMMDAPPLS(1)PFPHIK	4	-0.86569	1	0.782369	0.834297	0.890748	1.14015	1.23392	1.21064
hsa04350 TGF-beta signaling pathway	0.226288	3	1.8	Q9UBS0	416	2.556	Up	0.00142006	S	Ribosomal protein S6 kinase beta-2 OS=Homo sapiens OX=9606 GN=RPS6KB2 PE=1 SV=2	RPS6KB2	0.994398	0.00771359	64.841	RLNS(0.994)S(0.006)PR	3	-0.54426	1	0.665977	0.612967	0.456459	1.3966	1.58972	1.4494
hsa00190 Oxidative phosphorylation	0.0120095	4	3.9	P36542	146	1.326	Up	0.00186417	S	ATP synthase subunit gamma, mitochondrial OS=Homo sapiens OX=9606 GN=ATP5F1C PE=1 SV=1	ATP5F1C	0.848104	6.42345e-05	87.083	T(0.152)HS(0.848)DQFLVAFK	3	0.14265	1	0.803016	0.915907	0.860324	1.13105	1.15733	1.13043
hsa00190 Oxidative phosphorylation	0.0120095	4	3.9	P38606	384	1.207	Up	0.0072382	S	V-type proton ATPase catalytic subunit A OS=Homo sapiens OX=9606 GN=ATP6V1A PE=1 SV=2	ATP6V1A	0.999827	0.0229082	48.091	LAS(1)FYER	2	-0.11556	1	0.972755	0.890411	0.889642	1.06165	1.11256	1.14769
hsa00190 Oxidative phosphorylation	0.0120095	4	3.9	P06576	465	2.416	Up	1.69111e-05	S	ATP synthase subunit beta, mitochondrial OS=Homo sapiens OX=9606 GN=ATP5F1B PE=1 SV=3	ATP5F1B	0.999999	5.26017e-05	96.723	FLS(1)QPFQVAEVFTGHMGK	3	0.090395	2	0.623975	0.588008	0.587669	1.38215	1.52314	1.44229
hsa00190 Oxidative phosphorylation	0.0120095	4	3.9	Q15904	465	1.508	Up	0.02214	S	V-type proton ATPase subunit S1 OS=Homo sapiens OX=9606 GN=ATP6AP1 PE=1 SV=2	ATP6AP1	0.905009	0.00787348	58.172	GPT(0.056)IS(0.905)LT(0.039)QIV	2	-0.28731	1	0.829135	0.661563	0.976657	1.19661	1.21403	1.30917
hsa05410 Hypertrophic cardiomyopathy (HCM)	0.666991	1	0.98	Q13131	524	1.223	Up	0.041024	S	5'-AMP-activated protein kinase catalytic subunit alpha-1 OS=Homo sapiens OX=9606 GN=PRKAA1 PE=1 SV=4	PRKAA1	0.818051	1.36024e-07	120.05	SSEVS(0.001)LT(0.029)S(0.151)S(0.818)VT(0.007)S(0.991)LDS(0.002)SPVDLTPR	3	0.64002	3	0.820746	0.947162	0.923009	1.20225	1.07925	1.00904
hsa03410 Base excision repair	0.262701	3	1.67	P39748	255	1.473	Up	0.023843	S	Flap endonuclease 1 OS=Homo sapiens OX=9606 GN=FEN1 PE=1 SV=1	FEN1	1	0.000509054	84.365	HKS(1)IEEIVR	3	0.29216	1	0.85423	0.69883	0.923591	1.387	1.08999	1.17061
hsa03410 Base excision repair	0.262701	3	1.67	P18887	241	1.252	Up	0.020277	S	DNA repair protein XRCC1 OS=Homo sapiens OX=9606 GN=XRCC1 PE=1 SV=2	XRCC1	1	4.50297e-08	122.33	AIGSTSKPQES(1)PK	4	0.078245	5	0.952107	0.858824	0.873552	1.01005	1.17872	1.17294
hsa03410 Base excision repair	0.262701	3	1.67	P49916	913	1.485	Up	0.037939	S	DNA ligase 3 OS=Homo sapiens OX=9606 GN=LIG3 PE=1 SV=2	LIG3	0.778642	0.00598784	58.132	LAT(0.014)KS(0.208)S(0.779)PVK	3	-0.60712	1	1.0159	0.704225	0.719192	1.148	1.11905	1.35573
hsa04971 Gastric acid secretion	0.85468	1	0.56	P0DP25	102	1.304	Up	0.00041989	S	Calmodulin-3 OS=Homo sapiens OX=9606 GN=CALM3 PE=1 SV=1	CALM3	1	0.000220671	86.987	VFDKDGNGYIS(1)AAELR	3	0.004572	1	0.860182	0.856137	0.893194	1.17683	1.09606	1.12946
hsa04915 Estrogen signaling pathway	0.972652	1	0.3	P0DP25	102	1.304	Up	0.00041989	S	Calmodulin-3 OS=Homo sapiens OX=9606 GN=CALM3 PE=1 SV=1	CALM3	1	0.000220671	86.987	VFDKDGNGYIS(1)AAELR	3	0.004572	1	0.860182	0.856137	0.893194	1.17683	1.09606	1.12946
hsa05214 Glioma	0.972652	1	0.3	P0DP25	102	1.304	Up	0.00041989	S	Calmodulin-3 OS=Homo sapiens OX=9606 GN=CALM3 PE=1 SV=1	CALM3	1	0.000220671	86.987	VFDKDGNGYIS(1)AAELR	3	0.004572	1	0.860182	0.856137	0.893194	1.17683	1.09606	1.12946
hsa04931 Insulin resistance	0.602386	4	0.98	Q13131	524	1.223	Up	0.041024	S	5'-AMP-activated protein kinase catalytic subunit alpha-1 OS=Homo sapiens OX=9606 GN=PRKAA1 PE=1 SV=4	PRKAA1	0.818051	1.36024e-07	120.05	SSEVS(0.001)LT(0.029)S(0.151)S(0.818)VT(0.007)S(0.991)LDS(0.002)SPVDLTPR	3	0.64002	3	0.820746	0.947162	0.923009	1.20225	1.07925	1.00904
hsa04931 Insulin resistance	0.602386	4	0.98	P13807	727	1.212	Up	0.036422	S	Glycogen [starch] synthase, muscle OS=Homo sapiens OX=9606 GN=GYS1 PE=1 SV=2	GYS1	0.907573	1.31659e-17	158.16	NSVDTATSSSLST(0.001)PS(0.008)EPLS(0.908)PT(0.055)S(0.012)S(0.017)LGEER	3	0.068497	1	0.805301	0.928736	0.980553	1.08566	1.05922	1.14395
hsa04931 Insulin resistance	0.602386	4	0.98	Q9UBS0	416	2.556	Up	0.00142006	S	Ribosomal protein S6 kinase beta-2 OS=Homo sapiens OX=9606 GN=RPS6KB2 PE=1 SV=2	RPS6KB2	0.994398	0.00771359	64.841	RLNS(0.994)S(0.006)PR	3	-0.54426	1	0.665977	0.612967	0.456459	1.3966	1.58972	1.4494
hsa04931 Insulin resistance	0.602386	4	0.98	Q15418	687	1.479	Up	0.0068244	S	Ribosomal protein S6 kinase alpha-1 OS=Homo sapiens OX=9606 GN=RPS6KA1 PE=1 SV=2	RPS6KA1	0.983875	1.52732e-05	105.51	DKLPQS(0.016)QLS(0.984)HQDLQLVK	4	-0.28314	1	0.866178	0.771154	0.807586	1.04921	1.26688	1.30104
hsa04664 Fc epsilon RI signaling pathway	0.916576	1	0.43	Q16539	180	2.17	Up	0.00035653	T	Mitogen-activated protein kinase 14 OS=Homo sapiens OX=9606 GN=MAPK14 PE=1 SV=3	MAPK14	0.999883	0.000118317	84.508	HTDDEMT(1)GY(0.998)VAT(0.002)R	3	0.46926	1	0.71334	0.660397	0.573296	1.46596	1.41754	1.34139
hsa04664 Fc epsilon RI signaling pathway	0.916576	1	0.43	Q16539	182	2.252	Up	3.8544e-05	Y	Mitogen-activated protein kinase 14 OS=Homo sapiens OX=9606 GN=MAPK14 PE=1 SV=3	MAPK14	0.998479	6.03326e-22	194.65	HTDDEMT(0.002)GY(0.998)VATR	2	0.15731	7	0.603595	0.666667	0.628385	1.48511	1.44154	1.34816
hsa05152 Tuberculosis	0.52053	4	1.08	Q16539	180	2.17	Up	0.00035653	T	Mitogen-activated protein kinase 14 OS=Homo sapiens OX=9606 GN=MAPK14 PE=1 SV=3	MAPK14	0.999883	0.000118317	84.508	HTDDEMT(1)GY(0.998)VAT(0.002)R	3	0.46926	1	0.71334	0.660397	0.573296	1.46596	1.41754	1.34139
hsa05152 Tuberculosis	0.52053	4	1.08	Q16539	182	2.252	Up	3.8544e-05	Y	Mitogen-activated protein kinase 14 OS=Homo sapiens OX=9606 GN=MAPK14 PE=1 SV=3	MAPK14	0.998479	6.03326e-22	194.65	HTDDEMT(0.002)GY(0.998)VATR	2	0.15731	7	0.603595	0.666667	0.628385	1.48511	1.44154	1.34816
hsa05152 Tuberculosis	0.52053	4	1.08	Q9NZN5	736	1.276	Up	0.0105604	T	Rho guanine nucleotide exchange factor 12 OS=Homo sapiens OX=9606 GN=ARHGEF12 PE=1 SV=1	ARHGEF12	0.992543	0.000558217	67.234	VT(0.007)EHGT(0.993)PKPFR	4	-0.24544	1	0.852473	0.908913	0.901341	1.02703	1.15762	1.21173
hsa05152 Tuberculosis	0.52053	4	1.08	P0DP25	102	1.304	Up	0.00041989	S	Calmodulin-3 OS=Homo sapiens OX=9606 GN=CALM3 PE=1 SV=1	CALM3	1	0.000220671	86.987	VFDKDGNGYIS(1)AAELR	3	0.004572	1	0.860182	0.856137	0.893194	1.17683	1.09606	1.12946
hsa05152 Tuberculosis	0.52053	4	1.08	Q15904	465	1.508	Up	0.02214	S	V-type proton ATPase subunit S1 OS=Homo sapiens OX=9606 GN=ATP6AP1 PE=1 SV=2	ATP6AP1	0.905009	0.00787348	58.172	GPT(0.056)IS(0.905)LT(0.039)QIV	2	-0.28731	1	0.829135	0.661563	0.976657	1.19661	1.21403	1.30917
hsa04020 Calcium signaling pathway	0.938715	2	0.47	P46020	758	1.592	Up	0.000138859	S	Phosphorylase b kinase regulatory subunit alpha, skeletal muscle isoform OS=Homo sapiens OX=9606 GN=PHKA1 PE=1 SV=2	PHKA1	1	0.000327631	94.717	DQS(1)GEVDFK	2	0.12455	1	0.760167	0.81092	0.762287	1.27316	1.26364	1.17833
hsa04020 Calcium signaling pathway	0.938715	2	0.47	P0DP25	102	1.304	Up	0.00041989	S	Calmodulin-3 OS=Homo sapiens OX=9606 GN=CALM3 PE=1 SV=1	CALM3	1	0.000220671	86.987	VFDKDGNGYIS(1)AAELR	3	0.004572	1	0.860182	0.856137	0.893194	1.17683	1.09606	1.12946
hsa04540 Gap junction	0.936833	1	0.39	P07437	172	1.385	Up	0.000179802	S	Tubulin beta chain OS=Homo sapiens OX=9606 GN=TUBB PE=1 SV=2	TUBB	0.997835	8.00409e-05	85.554	IMNTFS(0.002)VVPS(0.998)PK	3	-0.5506	4	0.848756	0.813527	0.880228	1.1734	1.1565	1.19157
hsa04540 Gap junction	0.936833	1	0.39	P07437	40	1.369	Up	0.0033589	S	Tubulin beta chain OS=Homo sapiens OX=9606 GN=TUBB PE=1 SV=2	TUBB	0.983273	1.21144e-17	160.45	FWEVISDEHGIDPT(0.001)GT(0.016)YHGDS(0.983)DLQLDR	4	-1.4045	2	0.79005	0.894686	0.86692	1.16383	1.09654	1.2327
hsa04540 Gap junction	0.936833	1	0.39	P07437	285	2.476	Up	0.000124214	T	Tubulin beta chain OS=Homo sapiens OX=9606 GN=TUBB PE=1 SV=2	TUBB	0.998826	1.69394e-16	165.66	ALT(0.999)VPELT(0.001)QQVFDAK	3	0.87042	1	0.641791	0.568116	0.576996	1.56489	1.52337	1.33601
hsa05202 Transcriptional misregulation in cancer	0.849444	4	0.69	Q9C0K0	260	1.293	Up	0.00168403	T	B-cell lymphoma/leukemia 11B OS=Homo sapiens OX=9606 GN=BCL11B PE=1 SV=1	BCL11B	0.999985	1.96555e-31	197.24	IYLEPGPASSSLT(1)PR	2	0.82884	1	0.914563	0.889961	0.844878	1.19372	1.09467	1.13636
hsa05202 Transcriptional misregulation in cancer	0.849444	4	0.69	Q03164	337	1.235	Up	0.020636	T	Histone-lysine N-methyltransferase 2A OS=Homo sapiens OX=9606 GN=KMT2A PE=1 SV=5	KMT2A	0.998224	0.00517325	57.434	DKEGT(0.998)PPLT(0.002)K	4	3.4573	1	0.881256	0.908602	0.93254	1.00949	1.21209	1.14186
hsa05202 Transcriptional misregulation in cancer	0.849444	4	0.69	Q03164	532	1.485	Up	0.0254	S	Histone-lysine N-methyltransferase 2A OS=Homo sapiens OX=9606 GN=KMT2A PE=1 SV=5	KMT2A	0.968259	0.0344149	43.308	RY(0.03)S(0.968)VS(0.002)ER	3	-0.16616	1	0.872424	0.711828	0.875	1.07489	1.43954	1.13686
hsa05202 Transcriptional misregulation in cancer	0.849444	4	0.69	Q03164	351	1.823	Up	0.0058417	S	Histone-lysine N-methyltransferase 2A OS=Homo sapiens OX=9606 GN=KMT2A PE=1 SV=5	KMT2A	0.999921	0.00838154	69.216	TVVRQS(1)PR	2	-0.25845	1	0.672228	0.890323	0.616071	1.39241	1.30518	1.27373
hsa05202 Transcriptional misregulation in cancer	0.849444	4	0.69	Q71DI3	81	1.229	Up	0.023756	T	Histone H3.2 OS=Homo sapiens OX=9606 GN=HIST2H3A PE=1 SV=3	HIST2H3A	1	9.82525e-06	106.14	EIAQDFKT(1)DLR	3	0.51511	1	0.977055	0.809798	0.944172	1.10722	1.1442	1.1041
hsa05202 Transcriptional misregulation in cancer	0.849444	4	0.69	P29590	8	1.375	Up	0.039518	S	Protein PML OS=Homo sapiens OX=9606 GN=PML PE=1 SV=3	PML	0.999756	1.41572e-05	73.239	S(1)PRPQQDPARPQEPTMPPPETPSEGR	4	-0.36428	1	0.983794	0.805985	0.776022	1.36013	1.0916	1.07614
hsa05100 Bacterial invasion of epithelial cells	0.958416	1	0.34	Q92556	344	1.236	Up	9.71e-05	S	Engulfment and cell motility protein 1 OS=Homo sapiens OX=9606 GN=ELMO1 PE=1 SV=2	ELMO1	0.936893	1.24059e-31	213.81	IAFDAESEPNNS(0.002)S(0.061)GS(0.937)MEK	2	0.52122	5	0.906667	0.884498	0.878074	1.09366	1.11923	1.08527
hsa03018 RNA degradation	0.865964	2	0.6	O95453	557	1.236	Up	0.031922	S	Poly(A)-specific ribonuclease PARN OS=Homo sapiens OX=9606 GN=PARN PE=1 SV=1	PARN	0.944011	6.62108e-10	143.67	NNS(0.944)FT(0.056)APSTVGK	3	0.25288	3	0.887629	0.957645	0.842459	1.06114	1.22746	1.03368
hsa03018 RNA degradation	0.865964	2	0.6	P17858	775	1.607	Up	0.0032178	S	ATP-dependent 6-phosphofructokinase, liver type OS=Homo sapiens OX=9606 GN=PFKL PE=1 SV=6	PFKL	0.998656	0.000204798	94.688	RT(0.001)LS(0.999)MDK	3	0.30762	2	0.890542	0.706861	0.730489	1.21954	1.21528	1.30616
hsa03018 RNA degradation	0.865964	2	0.6	P17858	773	1.533	Up	0.00042209	T	ATP-dependent 6-phosphofructokinase, liver type OS=Homo sapiens OX=9606 GN=PFKL PE=1 SV=6	PFKL	0.939626	0.00104982	97.734	T(0.94)LS(0.06)MDKGF	2	0.77738	2	0.816153	0.79106	0.78564	1.27466	1.13234	1.26143
hsa00520 Amino sugar and nucleotide sugar metabolism	0.323744	2	1.73	O60701	476	1.327	Up	0.0030169	S	UDP-glucose 6-dehydrogenase OS=Homo sapiens OX=9606 GN=UGDH PE=1 SV=1	UGDH	0.999846	0.0185742	46.156	RIPYAPS(1)GEIPK	3	0.29322	1	0.86359	0.831967	0.896733	1.1763	1.06213	1.20229
hsa00520 Amino sugar and nucleotide sugar metabolism	0.323744	2	1.73	P36871	117	1.45	Up	7.5365e-05	S	Phosphoglucomutase-1 OS=Homo sapiens OX=9606 GN=PGM1 PE=1 SV=3	PGM1	0.99941	5.8922e-32	216.64	AIGGIILT(0.001)AS(0.999)HNPGGPNGDFGIK	2	1.0916	12	0.830151	0.863302	0.80746	1.18924	1.2058	1.23173
hsa05340 Primary immunodeficiency	0.552512	2	1.12	P43403	106	1.203	Up	0.036162	S	Tyrosine-protein kinase ZAP-70 OS=Homo sapiens OX=9606 GN=ZAP70 PE=1 SV=1	ZAP70	1	0.000234608	67.496	KPCNRPS(1)GLEPQPGVFDCLR	4	0.29141	1	0.872816	0.993097	0.896065	1.15692	1.15456	1.01118
hsa05340 Primary immunodeficiency	0.552512	2	1.12	P06239	158	1.297	Up	0.0058213	S	Tyrosine-protein kinase Lck OS=Homo sapiens OX=9606 GN=LCK PE=1 SV=6	LCK	0.899898	0.000522489	77.795	ES(0.021)ES(0.9)T(0.078)AGS(0.001)FSLSVR	2	-0.78547	1	0.796709	0.889423	0.924453	1.15988	1.13996	1.08577
hsa05340 Primary immunodeficiency	0.552512	2	1.12	P06239	394	1.225	Up	0.00126248	Y	Tyrosine-protein kinase Lck OS=Homo sapiens OX=9606 GN=LCK PE=1 SV=6	LCK	0.993133	5.27585e-10	153.34	LIEDNEY(0.993)T(0.007)AR	3	0.54142	3	0.893514	0.927885	0.865805	1.0854	1.13083	1.07669
hsa05340 Primary immunodeficiency	0.552512	2	1.12	P06239	505	1.276	Up	0.037598	Y	Tyrosine-protein kinase Lck OS=Homo sapiens OX=9606 GN=LCK PE=1 SV=6	LCK	0.999913	6.68754e-17	174.62	SVLEDFFTATEGQY(1)QPQP	2	-0.57314	3	1.00194	0.791346	0.847913	1.19067	1.13996	1.03935
hsa04068 FoxO signaling pathway	0.780676	3	0.76	Q16539	180	2.17	Up	0.00035653	T	Mitogen-activated protein kinase 14 OS=Homo sapiens OX=9606 GN=MAPK14 PE=1 SV=3	MAPK14	0.999883	0.000118317	84.508	HTDDEMT(1)GY(0.998)VAT(0.002)R	3	0.46926	1	0.71334	0.660397	0.573296	1.46596	1.41754	1.34139
hsa04068 FoxO signaling pathway	0.780676	3	0.76	Q16539	182	2.252	Up	3.8544e-05	Y	Mitogen-activated protein kinase 14 OS=Homo sapiens OX=9606 GN=MAPK14 PE=1 SV=3	MAPK14	0.998479	6.03326e-22	194.65	HTDDEMT(0.002)GY(0.998)VATR	2	0.15731	7	0.603595	0.666667	0.628385	1.48511	1.44154	1.34816
hsa04068 FoxO signaling pathway	0.780676	3	0.76	Q13131	524	1.223	Up	0.041024	S	5'-AMP-activated protein kinase catalytic subunit alpha-1 OS=Homo sapiens OX=9606 GN=PRKAA1 PE=1 SV=4	PRKAA1	0.818051	1.36024e-07	120.05	SSEVS(0.001)LT(0.029)S(0.151)S(0.818)VT(0.007)S(0.991)LDS(0.002)SPVDLTPR	3	0.64002	3	0.820746	0.947162	0.923009	1.20225	1.07925	1.00904
hsa04068 FoxO signaling pathway	0.780676	3	0.76	P60520	10	1.463	Up	0.023264	S	Gamma-aminobutyric acid receptor-associated protein-like 2 OS=Homo sapiens OX=9606 GN=GABARAPL2 PE=1 SV=1	GABARAPL2	1	0.000694321	89.171	EDHS(1)LEHR	3	0.29567	1	0.751445	0.85458	0.882114	1	1.31208	1.32753
hsa03010 Ribosome	0.849444	4	0.69	P83731	83	2.033	Up	0.00192343	T	60S ribosomal protein L24 OS=Homo sapiens OX=9606 GN=RPL24 PE=1 SV=1	RPL24	0.995555	3.85458e-11	132.08	AIT(0.996)GAS(0.004)LADIMAK	3	-0.065416	1	0.768916	0.638388	0.594071	1.31966	1.51737	1.23236
hsa03010 Ribosome	0.849444	4	0.69	P50914	139	1.302	Up	0.00075542	S	60S ribosomal protein L14 OS=Homo sapiens OX=9606 GN=RPL14 PE=1 SV=4	RPL14	1	0.00501307	67.519	AALLKAS(1)PK	2	-0.77958	7	0.9069	0.859477	0.862445	1.09016	1.16805	1.16444
hsa03010 Ribosome	0.849444	4	0.69	P30050	38	1.216	Up	0.022822	S	60S ribosomal protein L12 OS=Homo sapiens OX=9606 GN=RPL12 PE=1 SV=1	RPL12	1	4.67323e-05	110.08	IGPLGLS(1)PK	2	-0.50949	3	0.843269	0.968847	0.915464	1.04167	1.18201	1.0944
hsa03010 Ribosome	0.849444	4	0.69	P05386	104	1.226	Up	0.048644	S	60S acidic ribosomal protein P1 OS=Homo sapiens OX=9606 GN=RPLP1 PE=1 SV=1	RPLP1	1	6.52976e-41	235.35	KEES(1)EES(1)DDDMGFGLFD	3	-1.1157	88	0.90628	0.889503	0.941003	1.26946	1.079	1.00566
hsa04216 Ferroptosis	0.666991	1	0.98	P02786	34	1.775	Up	0.0023643	S	Transferrin receptor protein 1 OS=Homo sapiens OX=9606 GN=TFRC PE=1 SV=2	TFRC	1	8.18211e-06	99.747	QVDGDNS(1)HVEMK	3	-0.82969	1	0.637374	0.797571	0.744637	1.40239	1.29349	1.17362
hsa05170 Human immunodeficiency virus 1 infection	0.39786	9	1.13	Q16539	180	2.17	Up	0.00035653	T	Mitogen-activated protein kinase 14 OS=Homo sapiens OX=9606 GN=MAPK14 PE=1 SV=3	MAPK14	0.999883	0.000118317	84.508	HTDDEMT(1)GY(0.998)VAT(0.002)R	3	0.46926	1	0.71334	0.660397	0.573296	1.46596	1.41754	1.34139
hsa05170 Human immunodeficiency virus 1 infection	0.39786	9	1.13	Q16539	182	2.252	Up	3.8544e-05	Y	Mitogen-activated protein kinase 14 OS=Homo sapiens OX=9606 GN=MAPK14 PE=1 SV=3	MAPK14	0.998479	6.03326e-22	194.65	HTDDEMT(0.002)GY(0.998)VATR	2	0.15731	7	0.603595	0.666667	0.628385	1.48511	1.44154	1.34816
hsa05170 Human immunodeficiency virus 1 infection	0.39786	9	1.13	Q13546	320	1.508	Up	0.0105427	S	Receptor-interacting serine/threonine-protein kinase 1 OS=Homo sapiens OX=9606 GN=RIPK1 PE=1 SV=3	RIPK1	1	6.96758e-05	92.289	MQS(1)LQLDCVAVPSSR	2	-0.26441	2	0.750795	0.850431	0.845521	1.39956	1.22883	1.06155
hsa05170 Human immunodeficiency virus 1 infection	0.39786	9	1.13	Q13535	1989	1.373	Up	0.0153005	T	Serine/threonine-protein kinase ATR OS=Homo sapiens OX=9606 GN=ATR PE=1 SV=3	ATR	1	4.00762e-07	123	GVELCFPENET(1)PPEGK	4	-0.42988	4	0.954796	0.745545	0.854271	1.24854	1.13439	1.12464
hsa05170 Human immunodeficiency virus 1 infection	0.39786	9	1.13	P23528	24	1.216	Up	0.047341	S	Cofilin-1 OS=Homo sapiens OX=9606 GN=CFL1 PE=1 SV=3	CFL1	0.789751	0.00949448	57.225	KS(0.172)S(0.79)T(0.039)PEEVK	2	-0.81102	1	0.850679	0.883504	1.00487	1.21468	1.07945	1.03696
hsa05170 Human immunodeficiency virus 1 infection	0.39786	9	1.13	P0DP25	102	1.304	Up	0.00041989	S	Calmodulin-3 OS=Homo sapiens OX=9606 GN=CALM3 PE=1 SV=1	CALM3	1	0.000220671	86.987	VFDKDGNGYIS(1)AAELR	3	0.004572	1	0.860182	0.856137	0.893194	1.17683	1.09606	1.12946
hsa05170 Human immunodeficiency virus 1 infection	0.39786	9	1.13	P63208	131	1.367	Up	0.00020489	T	S-phase kinase-associated protein 1 OS=Homo sapiens OX=9606 GN=SKP1 PE=1 SV=2	SKP1	1	0.00750675	61.344	GKT(1)PEEIRK	4	0.0066299	4	0.869648	0.863501	0.813084	1.14462	1.14822	1.18687
hsa05170 Human immunodeficiency virus 1 infection	0.39786	9	1.13	O14757	317	1.573	Up	0.0181016	S	Serine/threonine-protein kinase Chk1 OS=Homo sapiens OX=9606 GN=CHEK1 PE=1 SV=2	CHEK1	0.979974	8.86255e-06	127.83	YSS(0.02)S(0.98)QPEPR	2	-0.08267	1	0.664557	0.95122	0.749726	1.28276	1.10736	1.33012
hsa05170 Human immunodeficiency virus 1 infection	0.39786	9	1.13	P27797	195	1.462	Up	0.0035425	S	Calreticulin OS=Homo sapiens OX=9606 GN=CALR PE=1 SV=1	CALR	0.993692	1.82952e-08	129.72	IDNSQVES(0.006)GS(0.994)LEDDWDFLPPKK	4	0.20133	2	0.80226	0.76992	0.902439	1.28173	1.2166	1.11912
hsa05170 Human immunodeficiency virus 1 infection	0.39786	9	1.13	Q9UBS0	416	2.556	Up	0.00142006	S	Ribosomal protein S6 kinase beta-2 OS=Homo sapiens OX=9606 GN=RPS6KB2 PE=1 SV=2	RPS6KB2	0.994398	0.00771359	64.841	RLNS(0.994)S(0.006)PR	3	-0.54426	1	0.665977	0.612967	0.456459	1.3966	1.58972	1.4494
hsa05131 Shigellosis	0.772619	2	0.74	Q16539	180	2.17	Up	0.00035653	T	Mitogen-activated protein kinase 14 OS=Homo sapiens OX=9606 GN=MAPK14 PE=1 SV=3	MAPK14	0.999883	0.000118317	84.508	HTDDEMT(1)GY(0.998)VAT(0.002)R	3	0.46926	1	0.71334	0.660397	0.573296	1.46596	1.41754	1.34139
hsa05131 Shigellosis	0.772619	2	0.74	Q16539	182	2.252	Up	3.8544e-05	Y	Mitogen-activated protein kinase 14 OS=Homo sapiens OX=9606 GN=MAPK14 PE=1 SV=3	MAPK14	0.998479	6.03326e-22	194.65	HTDDEMT(0.002)GY(0.998)VATR	2	0.15731	7	0.603595	0.666667	0.628385	1.48511	1.44154	1.34816
hsa05131 Shigellosis	0.772619	2	0.74	Q92556	344	1.236	Up	9.71e-05	S	Engulfment and cell motility protein 1 OS=Homo sapiens OX=9606 GN=ELMO1 PE=1 SV=2	ELMO1	0.936893	1.24059e-31	213.81	IAFDAESEPNNS(0.002)S(0.061)GS(0.937)MEK	2	0.52122	5	0.906667	0.884498	0.878074	1.09366	1.11923	1.08527
hsa03450 Non-homologous end-joining	0.373251	2	1.56	P12956	560	1.428	Up	0.0043204	S	X-ray repair cross-complementing protein 6 OS=Homo sapiens OX=9606 GN=XRCC6 PE=1 SV=2	XRCC6	0.999999	2.91266e-07	140.14	VEYS(1)EEELK	2	1.05	2	0.82922	0.899194	0.758789	1.22155	1.23108	1.09841
hsa03450 Non-homologous end-joining	0.373251	2	1.56	P12956	455	1.279	Up	0.0033955	T	X-ray repair cross-complementing protein 6 OS=Homo sapiens OX=9606 GN=XRCC6 PE=1 SV=2	XRCC6	1	0.000257384	85.813	IMAT(1)PEQVGK	2	-0.25649	4	0.842053	0.923387	0.875	1.18328	1.1255	1.06958
hsa03450 Non-homologous end-joining	0.373251	2	1.56	P39748	255	1.473	Up	0.023843	S	Flap endonuclease 1 OS=Homo sapiens OX=9606 GN=FEN1 PE=1 SV=1	FEN1	1	0.000509054	84.365	HKS(1)IEEIVR	3	0.29216	1	0.85423	0.69883	0.923591	1.387	1.08999	1.17061
hsa04070 Phosphatidylinositol signaling system	0.992268	1	0.22	P0DP25	102	1.304	Up	0.00041989	S	Calmodulin-3 OS=Homo sapiens OX=9606 GN=CALM3 PE=1 SV=1	CALM3	1	0.000220671	86.987	VFDKDGNGYIS(1)AAELR	3	0.004572	1	0.860182	0.856137	0.893194	1.17683	1.09606	1.12946
hsa00380 Tryptophan metabolism	0.23986	1	3.9	P51648	293	2.199	Up	0.024818	S	Fatty aldehyde dehydrogenase OS=Homo sapiens OX=9606 GN=ALDH3A2 PE=1 SV=1	ALDH3A2	1	0.0232812	40.727	ILS(1)LLEGQK	3	-0.47646	1	0.890503	0.609589	0.418217	1.23077	1.32709	1.66071
hsa05210 Colorectal cancer	0.958416	1	0.34	Q9UBS0	416	2.556	Up	0.00142006	S	Ribosomal protein S6 kinase beta-2 OS=Homo sapiens OX=9606 GN=RPS6KB2 PE=1 SV=2	RPS6KB2	0.994398	0.00771359	64.841	RLNS(0.994)S(0.006)PR	3	-0.54426	1	0.665977	0.612967	0.456459	1.3966	1.58972	1.4494
hsa04015 Rap1 signaling pathway	0.740627	5	0.83	Q16539	180	2.17	Up	0.00035653	T	Mitogen-activated protein kinase 14 OS=Homo sapiens OX=9606 GN=MAPK14 PE=1 SV=3	MAPK14	0.999883	0.000118317	84.508	HTDDEMT(1)GY(0.998)VAT(0.002)R	3	0.46926	1	0.71334	0.660397	0.573296	1.46596	1.41754	1.34139
hsa04015 Rap1 signaling pathway	0.740627	5	0.83	Q16539	182	2.252	Up	3.8544e-05	Y	Mitogen-activated protein kinase 14 OS=Homo sapiens OX=9606 GN=MAPK14 PE=1 SV=3	MAPK14	0.998479	6.03326e-22	194.65	HTDDEMT(0.002)GY(0.998)VATR	2	0.15731	7	0.603595	0.666667	0.628385	1.48511	1.44154	1.34816
hsa04015 Rap1 signaling pathway	0.740627	5	0.83	Q86WV1	271	1.317	Up	0.041322	Y	Src kinase-associated phosphoprotein 1 OS=Homo sapiens OX=9606 GN=SKAP1 PE=1 SV=3	SKAP1	0.999995	3.68804e-10	119.42	EPTEEKEEEDIY(1)EVLPDEEHDLEEDESGTR	4	0.42435	1	0.760346	0.968528	0.893926	1.17111	1.25845	1.02434
hsa04015 Rap1 signaling pathway	0.740627	5	0.83	P0DP25	102	1.304	Up	0.00041989	S	Calmodulin-3 OS=Homo sapiens OX=9606 GN=CALM3 PE=1 SV=1	CALM3	1	0.000220671	86.987	VFDKDGNGYIS(1)AAELR	3	0.004572	1	0.860182	0.856137	0.893194	1.17683	1.09606	1.12946
hsa04015 Rap1 signaling pathway	0.740627	5	0.83	O15117	571	1.359	Up	0.030659	Y	FYN-binding protein 1 OS=Homo sapiens OX=9606 GN=FYB1 PE=1 SV=2	FYB1	0.999985	1.26464e-07	120.57	TTAVEIDY(1)DSLK	3	0.4364	1	0.84832	0.791271	0.958539	1.25055	1.26999	1.00937
hsa04015 Rap1 signaling pathway	0.740627	5	0.83	O15117	573	1.54	Up	0.00060483	S	FYN-binding protein 1 OS=Homo sapiens OX=9606 GN=FYB1 PE=1 SV=2	FYB1	1	4.2796e-08	129.05	TTAVEIDYDS(1)LK	2	0.24386	2	0.772934	0.813093	0.835143	1.32594	1.23988	1.16354
hsa04015 Rap1 signaling pathway	0.740627	5	0.83	O15117	235	1.295	Up	0.0129007	S	FYN-binding protein 1 OS=Homo sapiens OX=9606 GN=FYB1 PE=1 SV=2	FYB1	1	0.0062536	59.908	S(1)GPLKPAR	3	0.41296	1	0.944596	0.814042	0.894373	1.12971	1.06957	1.23542
hsa04015 Rap1 signaling pathway	0.740627	5	0.83	Q13905	281	1.382	Up	0.0069764	S	Rap guanine nucleotide exchange factor 1 OS=Homo sapiens OX=9606 GN=RAPGEF1 PE=1 SV=3	RAPGEF1	1	2.3897e-05	89.311	VVDNS(1)PPPALPPK	3	-0.042345	1	0.796082	0.915334	0.862355	1.24175	1.07306	1.24134
hsa04015 Rap1 signaling pathway	0.740627	5	0.83	Q13905	360	1.27	Up	0.020205	S	Rap guanine nucleotide exchange factor 1 OS=Homo sapiens OX=9606 GN=RAPGEF1 PE=1 SV=3	RAPGEF1	0.996786	0.000871883	81.016	LS(0.003)KS(0.997)DEQLSSLDR	2	-1.5705	1	0.817453	0.998119	0.864013	1.16863	1.07743	1.15704
hsa04015 Rap1 signaling pathway	0.740627	5	0.83	Q13905	296	1.258	Up	0.035037	S	Rap guanine nucleotide exchange factor 1 OS=Homo sapiens OX=9606 GN=RAPGEF1 PE=1 SV=3	RAPGEF1	0.844786	0.010805	57.203	QS(0.002)APS(0.845)PT(0.153)R	2	0.60459	1	0.979519	0.914393	0.806799	1.19104	1.02944	1.17667
hsa04213 Longevity regulating pathway - multiple species	0.591394	2	1.04	Q13131	524	1.223	Up	0.041024	S	5'-AMP-activated protein kinase catalytic subunit alpha-1 OS=Homo sapiens OX=9606 GN=PRKAA1 PE=1 SV=4	PRKAA1	0.818051	1.36024e-07	120.05	SSEVS(0.001)LT(0.029)S(0.151)S(0.818)VT(0.007)S(0.991)LDS(0.002)SPVDLTPR	3	0.64002	3	0.820746	0.947162	0.923009	1.20225	1.07925	1.00904
hsa04213 Longevity regulating pathway - multiple species	0.591394	2	1.04	Q9UBS0	416	2.556	Up	0.00142006	S	Ribosomal protein S6 kinase beta-2 OS=Homo sapiens OX=9606 GN=RPS6KB2 PE=1 SV=2	RPS6KB2	0.994398	0.00771359	64.841	RLNS(0.994)S(0.006)PR	3	-0.54426	1	0.665977	0.612967	0.456459	1.3966	1.58972	1.4494
hsa05142 Chagas disease (American trypanosomiasis)	0.661502	2	0.92	Q16539	180	2.17	Up	0.00035653	T	Mitogen-activated protein kinase 14 OS=Homo sapiens OX=9606 GN=MAPK14 PE=1 SV=3	MAPK14	0.999883	0.000118317	84.508	HTDDEMT(1)GY(0.998)VAT(0.002)R	3	0.46926	1	0.71334	0.660397	0.573296	1.46596	1.41754	1.34139
hsa05142 Chagas disease (American trypanosomiasis)	0.661502	2	0.92	Q16539	182	2.252	Up	3.8544e-05	Y	Mitogen-activated protein kinase 14 OS=Homo sapiens OX=9606 GN=MAPK14 PE=1 SV=3	MAPK14	0.998479	6.03326e-22	194.65	HTDDEMT(0.002)GY(0.998)VATR	2	0.15731	7	0.603595	0.666667	0.628385	1.48511	1.44154	1.34816
hsa05142 Chagas disease (American trypanosomiasis)	0.661502	2	0.92	P27797	195	1.462	Up	0.0035425	S	Calreticulin OS=Homo sapiens OX=9606 GN=CALR PE=1 SV=1	CALR	0.993692	1.82952e-08	129.72	IDNSQVES(0.006)GS(0.994)LEDDWDFLPPKK	4	0.20133	2	0.80226	0.76992	0.902439	1.28173	1.2166	1.11912
hsa04141 Protein processing in endoplasmic reticulum	0.54873	5	1.03	Q99442	345	1.438	Up	0.004863	S	Translocation protein SEC62 OS=Homo sapiens OX=9606 GN=SEC62 PE=1 SV=1	SEC62	0.999994	4.49749e-12	149.22	HS(0.197)DT(0.803)DS(1)DRREDDR	3	0.22618	5	0.855026	0.837209	0.795918	1.08195	1.166	1.32927
hsa04141 Protein processing in endoplasmic reticulum	0.54873	5	1.03	Q99442	343	2.134	Up	0.0153445	T	Translocation protein SEC62 OS=Homo sapiens OX=9606 GN=SEC62 PE=1 SV=1	SEC62	0.803181	2.11307e-05	93.495	HS(0.197)DT(0.803)DS(1)DRREDDR	3	0.22618	1	0.703704	0.757752	0.488776	1.05493	1.54871	1.55876
hsa04141 Protein processing in endoplasmic reticulum	0.54873	5	1.03	P63208	131	1.367	Up	0.00020489	T	S-phase kinase-associated protein 1 OS=Homo sapiens OX=9606 GN=SKP1 PE=1 SV=2	SKP1	1	0.00750675	61.344	GKT(1)PEEIRK	4	0.0066299	4	0.869648	0.863501	0.813084	1.14462	1.14822	1.18687
hsa04141 Protein processing in endoplasmic reticulum	0.54873	5	1.03	P27797	195	1.462	Up	0.0035425	S	Calreticulin OS=Homo sapiens OX=9606 GN=CALR PE=1 SV=1	CALR	0.993692	1.82952e-08	129.72	IDNSQVES(0.006)GS(0.994)LEDDWDFLPPKK	4	0.20133	2	0.80226	0.76992	0.902439	1.28173	1.2166	1.11912
hsa04141 Protein processing in endoplasmic reticulum	0.54873	5	1.03	P25685	149	1.776	Up	0.0093847	S	DnaJ homolog subfamily B member 1 OS=Homo sapiens OX=9606 GN=DNAJB1 PE=1 SV=4	DNAJB1	0.940868	0.00109496	83.53	S(0.941)RS(0.059)AQEPAR	2	-0.12926	2	0.888889	0.718447	0.600791	1.44513	1.22188	1.25431
hsa04141 Protein processing in endoplasmic reticulum	0.54873	5	1.03	Q9H3Z4	12	1.302	Up	0.0024617	S	DnaJ homolog subfamily C member 5 OS=Homo sapiens OX=9606 GN=DNAJC5 PE=1 SV=1	DNAJC5	0.938134	2.22056e-63	275.99	SLS(0.008)T(0.053)S(0.938)GESLYHVLGLDK	3	-0.15275	1	0.941176	0.836512	0.866409	1.16545	1.1697	1.10814
hsa04010 MAPK signaling pathway	0.777431	7	0.82	Q16539	180	2.17	Up	0.00035653	T	Mitogen-activated protein kinase 14 OS=Homo sapiens OX=9606 GN=MAPK14 PE=1 SV=3	MAPK14	0.999883	0.000118317	84.508	HTDDEMT(1)GY(0.998)VAT(0.002)R	3	0.46926	1	0.71334	0.660397	0.573296	1.46596	1.41754	1.34139
hsa04010 MAPK signaling pathway	0.777431	7	0.82	Q16539	182	2.252	Up	3.8544e-05	Y	Mitogen-activated protein kinase 14 OS=Homo sapiens OX=9606 GN=MAPK14 PE=1 SV=3	MAPK14	0.998479	6.03326e-22	194.65	HTDDEMT(0.002)GY(0.998)VATR	2	0.15731	7	0.603595	0.666667	0.628385	1.48511	1.44154	1.34816
hsa04010 MAPK signaling pathway	0.777431	7	0.82	P21333	1084	1.334	Up	0.0040447	S	Filamin-A OS=Homo sapiens OX=9606 GN=FLNA PE=1 SV=4	FLNA	0.999915	7.25433e-16	133.92	AFGPGLQGGSAGS(1)PAR	2	-0.31133	3	0.859571	0.874202	0.889823	1.26867	1.07805	1.15385
hsa04010 MAPK signaling pathway	0.777431	7	0.82	P21333	1459	1.357	Up	0.03862	S	Filamin-A OS=Homo sapiens OX=9606 GN=FLNA PE=1 SV=4	FLNA	0.999994	3.24732e-06	107.69	CSGPGLS(1)PGMVR	2	-1.2437	1	0.855993	0.84412	0.907563	1.4136	1.06335	1.06176
hsa04010 MAPK signaling pathway	0.777431	7	0.82	P35236	66	1.242	Up	0.031044	T	Tyrosine-protein phosphatase non-receptor type 7 OS=Homo sapiens OX=9606 GN=PTPN7 PE=1 SV=3	PTPN7	0.998093	7.67302e-11	138.46	SLGAVEPICS(0.002)VNT(0.998)PR	2	0.019813	3	0.868868	0.899642	0.948529	1.25167	1.01644	1.10698
hsa04010 MAPK signaling pathway	0.777431	7	0.82	P16949	31	1.318	Up	0.00064083	S	Stathmin OS=Homo sapiens OX=9606 GN=STMN1 PE=1 SV=3	STMN1	0.80194	1.14088e-06	109.72	S(0.198)KES(0.802)VPEFPLS(1)PPK	4	-0.67156	3	0.814672	0.889003	0.882292	1.12602	1.13175	1.14981
hsa04010 MAPK signaling pathway	0.777431	7	0.82	O95819	855	1.542	Up	0.00146324	S	Mitogen-activated protein kinase kinase kinase kinase 4 OS=Homo sapiens OX=9606 GN=MAP4K4 PE=1 SV=2	MAP4K4	0.967152	5.28659e-11	150.22	HKS(0.038)S(0.237)S(0.744)S(0.967)FT(0.013)PFIDPR	3	-1.1214	4	0.799253	0.835763	0.752918	1.14134	1.33722	1.2043
hsa04010 MAPK signaling pathway	0.777431	7	0.82	O95819	800	1.305	Up	0.0027835	S	Mitogen-activated protein kinase kinase kinase kinase 4 OS=Homo sapiens OX=9606 GN=MAP4K4 PE=1 SV=2	MAP4K4	0.831293	1.491e-10	136.46	AAS(0.831)S(0.167)LNLS(0.001)NGETESVK	3	0.84152	2	0.830999	0.874636	0.916342	1.18385	1.16119	1.07625
hsa04010 MAPK signaling pathway	0.777431	7	0.82	O95819	842	1.272	Up	0.0083839	S	Mitogen-activated protein kinase kinase kinase kinase 4 OS=Homo sapiens OX=9606 GN=MAP4K4 PE=1 SV=2	MAP4K4	0.942479	7.36601e-08	130.47	QT(0.022)QS(0.942)AS(0.028)S(0.006)T(0.002)LQK	2	0.37889	1	0.94958	0.834791	0.872568	1.10414	1.19936	1.07722
hsa04010 MAPK signaling pathway	0.777431	7	0.82	Q15418	687	1.479	Up	0.0068244	S	Ribosomal protein S6 kinase alpha-1 OS=Homo sapiens OX=9606 GN=RPS6KA1 PE=1 SV=2	RPS6KA1	0.983875	1.52732e-05	105.51	DKLPQS(0.016)QLS(0.984)HQDLQLVK	4	-0.28314	1	0.866178	0.771154	0.807586	1.04921	1.26688	1.30104
hsa04010 MAPK signaling pathway	0.777431	7	0.82	Q9Y6R4	1252	1.465	Up	3.9531e-05	S	Mitogen-activated protein kinase kinase kinase 4 OS=Homo sapiens OX=9606 GN=MAP3K4 PE=1 SV=2	MAP3K4	0.87522	4.75611e-24	191.36	HS(0.026)S(0.875)PT(0.098)EERDEPAYPR	3	-0.34954	1	0.8	0.814021	0.836288	1.16698	1.22688	1.19626
hsa04010 MAPK signaling pathway	0.777431	7	0.82	Q9Y6R4	214	3.185	Up	0.0022377	S	Mitogen-activated protein kinase kinase kinase 4 OS=Homo sapiens OX=9606 GN=MAP3K4 PE=1 SV=2	MAP3K4	0.818797	0.00112934	79.652	QT(0.173)S(0.819)RT(0.008)DCPADR	2	-0.63846	1	0.557672	0.533593	0.364964	1.2584	1.74086	1.63925
hsa04926 Relaxin signaling pathway	0.927404	1	0.41	Q16539	180	2.17	Up	0.00035653	T	Mitogen-activated protein kinase 14 OS=Homo sapiens OX=9606 GN=MAPK14 PE=1 SV=3	MAPK14	0.999883	0.000118317	84.508	HTDDEMT(1)GY(0.998)VAT(0.002)R	3	0.46926	1	0.71334	0.660397	0.573296	1.46596	1.41754	1.34139
hsa04926 Relaxin signaling pathway	0.927404	1	0.41	Q16539	182	2.252	Up	3.8544e-05	Y	Mitogen-activated protein kinase 14 OS=Homo sapiens OX=9606 GN=MAPK14 PE=1 SV=3	MAPK14	0.998479	6.03326e-22	194.65	HTDDEMT(0.002)GY(0.998)VATR	2	0.15731	7	0.603595	0.666667	0.628385	1.48511	1.44154	1.34816
hsa03060 Protein export	0.666991	1	0.98	Q99442	345	1.438	Up	0.004863	S	Translocation protein SEC62 OS=Homo sapiens OX=9606 GN=SEC62 PE=1 SV=1	SEC62	0.999994	4.49749e-12	149.22	HS(0.197)DT(0.803)DS(1)DRREDDR	3	0.22618	5	0.855026	0.837209	0.795918	1.08195	1.166	1.32927
hsa03060 Protein export	0.666991	1	0.98	Q99442	343	2.134	Up	0.0153445	T	Translocation protein SEC62 OS=Homo sapiens OX=9606 GN=SEC62 PE=1 SV=1	SEC62	0.803181	2.11307e-05	93.495	HS(0.197)DT(0.803)DS(1)DRREDDR	3	0.22618	1	0.703704	0.757752	0.488776	1.05493	1.54871	1.55876
hsa05140 Leishmaniasis	0.85468	1	0.56	Q16539	180	2.17	Up	0.00035653	T	Mitogen-activated protein kinase 14 OS=Homo sapiens OX=9606 GN=MAPK14 PE=1 SV=3	MAPK14	0.999883	0.000118317	84.508	HTDDEMT(1)GY(0.998)VAT(0.002)R	3	0.46926	1	0.71334	0.660397	0.573296	1.46596	1.41754	1.34139
hsa05140 Leishmaniasis	0.85468	1	0.56	Q16539	182	2.252	Up	3.8544e-05	Y	Mitogen-activated protein kinase 14 OS=Homo sapiens OX=9606 GN=MAPK14 PE=1 SV=3	MAPK14	0.998479	6.03326e-22	194.65	HTDDEMT(0.002)GY(0.998)VATR	2	0.15731	7	0.603595	0.666667	0.628385	1.48511	1.44154	1.34816
hsa04140 Autophagy - animal	0.901925	4	0.62	Q99570	853	1.599	Up	0.00602	S	Phosphoinositide 3-kinase regulatory subunit 4 OS=Homo sapiens OX=9606 GN=PIK3R4 PE=1 SV=3	PIK3R4	1	0.0103526	55.011	QDS(1)NVNEEWK	2	0.61309	1	0.714139	0.820982	0.825758	1.41981	1.09981	1.25569
hsa04140 Autophagy - animal	0.901925	4	0.62	Q13131	524	1.223	Up	0.041024	S	5'-AMP-activated protein kinase catalytic subunit alpha-1 OS=Homo sapiens OX=9606 GN=PRKAA1 PE=1 SV=4	PRKAA1	0.818051	1.36024e-07	120.05	SSEVS(0.001)LT(0.029)S(0.151)S(0.818)VT(0.007)S(0.991)LDS(0.002)SPVDLTPR	3	0.64002	3	0.820746	0.947162	0.923009	1.20225	1.07925	1.00904
hsa04140 Autophagy - animal	0.901925	4	0.62	Q9UBS0	416	2.556	Up	0.00142006	S	Ribosomal protein S6 kinase beta-2 OS=Homo sapiens OX=9606 GN=RPS6KB2 PE=1 SV=2	RPS6KB2	0.994398	0.00771359	64.841	RLNS(0.994)S(0.006)PR	3	-0.54426	1	0.665977	0.612967	0.456459	1.3966	1.58972	1.4494
hsa04140 Autophagy - animal	0.901925	4	0.62	P60520	10	1.463	Up	0.023264	S	Gamma-aminobutyric acid receptor-associated protein-like 2 OS=Homo sapiens OX=9606 GN=GABARAPL2 PE=1 SV=1	GABARAPL2	1	0.000694321	89.171	EDHS(1)LEHR	3	0.29567	1	0.751445	0.85458	0.882114	1	1.31208	1.32753
hsa04530 Tight junction	0.304893	8	1.25	Q6ZSZ5	85	1.429	Up	0.0022773	S	Rho guanine nucleotide exchange factor 18 OS=Homo sapiens OX=9606 GN=ARHGEF18 PE=1 SV=4	ARHGEF18	0.880649	0.00492655	67.997	S(0.058)RS(0.881)CS(0.058)ES(0.003)WR	2	0.022547	1	0.896016	0.778112	0.79661	1.23649	1.12358	1.1714
hsa04530 Tight junction	0.304893	8	1.25	Q14160	1348	1.351	Up	0.035981	S	Protein scribble homolog OS=Homo sapiens OX=9606 GN=SCRIB PE=1 SV=4	SCRIB	0.93406	7.85925e-06	69.462	AFAAVPTSHPPEDAPAQPPT(0.03)PGPAAS(0.934)PEQLS(0.036)FR	4	0.36161	1	1.02405	0.768672	0.853239	1.10073	1.31064	1.16434
hsa04530 Tight junction	0.304893	8	1.25	P61006	111	1.361	Up	0.0028797	S	Ras-related protein Rab-8A OS=Homo sapiens OX=9606 GN=RAB8A PE=1 SV=1	RAB8A	1	8.95918e-09	120.77	NIEEHAS(1)ADVEK	3	0.6417	3	0.922139	0.837624	0.815143	1.18374	1.21811	1.10375
hsa04530 Tight junction	0.304893	8	1.25	Q92930	111	1.475	Up	0.04868	S	Ras-related protein Rab-8B OS=Homo sapiens OX=9606 GN=RAB8B PE=1 SV=2	RAB8B	0.962087	2.03137e-07	117.18	NIEEHAS(0.962)S(0.038)DVER	2	-0.0094635	2	0.833002	0.69934	0.955752	1.22535	1.20324	1.24047
hsa04530 Tight junction	0.304893	8	1.25	Q92797	494	1.254	Up	0.0030982	S	Symplekin OS=Homo sapiens OX=9606 GN=SYMPK PE=1 SV=2	SYMPK	0.999954	5.85954e-43	228.29	RLS(1)AQGQAISVVGSLSSMSPLEEEAPQAK	3	-0.59368	4	0.946467	0.909729	0.841633	1.12564	1.111	1.14571
hsa04530 Tight junction	0.304893	8	1.25	Q92974	142	1.316	Up	0.0051386	S	Rho guanine nucleotide exchange factor 2 OS=Homo sapiens OX=9606 GN=ARHGEF2 PE=1 SV=4	ARHGEF2	0.959925	0.00105538	72.731	S(0.96)S(0.036)LS(0.004)LAK	2	0.10198	2	0.930399	0.831207	0.87051	1.07615	1.16579	1.22119
hsa04530 Tight junction	0.304893	8	1.25	Q92974	645	1.455	Up	0.029299	S	Rho guanine nucleotide exchange factor 2 OS=Homo sapiens OX=9606 GN=ARHGEF2 PE=1 SV=4	ARHGEF2	0.968061	5.9359e-05	123.79	S(0.006)ES(0.968)LES(0.026)PR	2	-0.32292	2	1	0.773307	0.724008	1.33066	1.08499	1.21914
hsa04530 Tight junction	0.304893	8	1.25	Q13131	524	1.223	Up	0.041024	S	5'-AMP-activated protein kinase catalytic subunit alpha-1 OS=Homo sapiens OX=9606 GN=PRKAA1 PE=1 SV=4	PRKAA1	0.818051	1.36024e-07	120.05	SSEVS(0.001)LT(0.029)S(0.151)S(0.818)VT(0.007)S(0.991)LDS(0.002)SPVDLTPR	3	0.64002	3	0.820746	0.947162	0.923009	1.20225	1.07925	1.00904
hsa04530 Tight junction	0.304893	8	1.25	P19105	18	1.605	Up	0.000183171	T	Myosin regulatory light chain 12A OS=Homo sapiens OX=9606 GN=MYL12A PE=1 SV=2	MYL12A	1	4.14264e-31	198.67	AT(1)S(1)NVFAMFDQSQIQEFK	3	-1.5076	12	0.768317	0.748357	0.82846	1.30126	1.23173	1.22992
hsa04530 Tight junction	0.304893	8	1.25	P19105	19	1.359	Up	5.7321e-05	S	Myosin regulatory light chain 12A OS=Homo sapiens OX=9606 GN=MYL12A PE=1 SV=2	MYL12A	1	3.22787e-64	273.37	AT(1)S(1)NVFAMFDQSQIQEFK	3	-1.5076	20	0.858416	0.841315	0.871345	1.16632	1.19102	1.13655
hsa04810 Regulation of actin cytoskeleton	0.674315	6	0.9	Q9NZN5	736	1.276	Up	0.0105604	T	Rho guanine nucleotide exchange factor 12 OS=Homo sapiens OX=9606 GN=ARHGEF12 PE=1 SV=1	ARHGEF12	0.992543	0.000558217	67.234	VT(0.007)EHGT(0.993)PKPFR	4	-0.24544	1	0.852473	0.908913	0.901341	1.02703	1.15762	1.21173
hsa04810 Regulation of actin cytoskeleton	0.674315	6	0.9	P23528	24	1.216	Up	0.047341	S	Cofilin-1 OS=Homo sapiens OX=9606 GN=CFL1 PE=1 SV=3	CFL1	0.789751	0.00949448	57.225	KS(0.172)S(0.79)T(0.039)PEEVK	2	-0.81102	1	0.850679	0.883504	1.00487	1.21468	1.07945	1.03696
hsa04810 Regulation of actin cytoskeleton	0.674315	6	0.9	Q92888	631	1.272	Up	0.00176281	S	Rho guanine nucleotide exchange factor 1 OS=Homo sapiens OX=9606 GN=ARHGEF1 PE=1 SV=2	ARHGEF1	0.989151	2.22082e-07	127.66	QS(0.011)S(0.989)DPMLSEFK	2	-0.053489	4	0.914454	0.886429	0.872137	1.20042	1.10505	1.09499
hsa04810 Regulation of actin cytoskeleton	0.674315	6	0.9	Q9NYB9	183	1.336	Up	0.0077834	S	Abl interactor 2 OS=Homo sapiens OX=9606 GN=ABI2 PE=1 SV=1	ABI2	0.999853	3.58333e-05	97.589	TTPPTQKPPS(1)PPMSGK	4	0.49497	5	0.824186	0.86548	0.913741	1.27578	1.11841	1.0835
hsa04810 Regulation of actin cytoskeleton	0.674315	6	0.9	P19105	18	1.605	Up	0.000183171	T	Myosin regulatory light chain 12A OS=Homo sapiens OX=9606 GN=MYL12A PE=1 SV=2	MYL12A	1	4.14264e-31	198.67	AT(1)S(1)NVFAMFDQSQIQEFK	3	-1.5076	12	0.768317	0.748357	0.82846	1.30126	1.23173	1.22992
hsa04810 Regulation of actin cytoskeleton	0.674315	6	0.9	P19105	19	1.359	Up	5.7321e-05	S	Myosin regulatory light chain 12A OS=Homo sapiens OX=9606 GN=MYL12A PE=1 SV=2	MYL12A	1	3.22787e-64	273.37	AT(1)S(1)NVFAMFDQSQIQEFK	3	-1.5076	20	0.858416	0.841315	0.871345	1.16632	1.19102	1.13655
hsa04810 Regulation of actin cytoskeleton	0.674315	6	0.9	O14974	871	1.287	Up	0.048356	S	Protein phosphatase 1 regulatory subunit 12A OS=Homo sapiens OX=9606 GN=PPP1R12A PE=1 SV=1	PPP1R12A	0.970474	5.92247e-68	268.3	STGVSFWTQDSDENEQEQQS(0.97)DT(0.029)EEGSNKK	4	-0.88047	1	0.846008	0.805634	0.976407	1.14407	1.12945	1.1093
hsa04550 Signaling pathways regulating pluripotency of stem cells	0.79492	2	0.71	Q16539	180	2.17	Up	0.00035653	T	Mitogen-activated protein kinase 14 OS=Homo sapiens OX=9606 GN=MAPK14 PE=1 SV=3	MAPK14	0.999883	0.000118317	84.508	HTDDEMT(1)GY(0.998)VAT(0.002)R	3	0.46926	1	0.71334	0.660397	0.573296	1.46596	1.41754	1.34139
hsa04550 Signaling pathways regulating pluripotency of stem cells	0.79492	2	0.71	Q16539	182	2.252	Up	3.8544e-05	Y	Mitogen-activated protein kinase 14 OS=Homo sapiens OX=9606 GN=MAPK14 PE=1 SV=3	MAPK14	0.998479	6.03326e-22	194.65	HTDDEMT(0.002)GY(0.998)VATR	2	0.15731	7	0.603595	0.666667	0.628385	1.48511	1.44154	1.34816
hsa04550 Signaling pathways regulating pluripotency of stem cells	0.79492	2	0.71	Q5UIP0	2196	1.234	Up	0.032336	S	Telomere-associated protein RIF1 OS=Homo sapiens OX=9606 GN=RIF1 PE=1 SV=2	RIF1	0.975038	1.5164e-05	90.707	SQEDEIS(0.025)S(0.975)PVNK	3	-1.2545	1	0.882648	0.991453	0.825998	1.18612	1.03768	1.10913
hsa04550 Signaling pathways regulating pluripotency of stem cells	0.79492	2	0.71	Q5UIP0	2393	1.213	Up	7.8208e-05	S	Telomere-associated protein RIF1 OS=Homo sapiens OX=9606 GN=RIF1 PE=1 SV=2	RIF1	0.958931	0.00185483	81.017	S(0.041)LS(0.959)PDEER	2	-0.24538	2	0.915747	0.903846	0.906858	1.12676	1.08889	1.09219
hsa04912 GnRH signaling pathway	0.64	3	0.94	Q16539	180	2.17	Up	0.00035653	T	Mitogen-activated protein kinase 14 OS=Homo sapiens OX=9606 GN=MAPK14 PE=1 SV=3	MAPK14	0.999883	0.000118317	84.508	HTDDEMT(1)GY(0.998)VAT(0.002)R	3	0.46926	1	0.71334	0.660397	0.573296	1.46596	1.41754	1.34139
hsa04912 GnRH signaling pathway	0.64	3	0.94	Q16539	182	2.252	Up	3.8544e-05	Y	Mitogen-activated protein kinase 14 OS=Homo sapiens OX=9606 GN=MAPK14 PE=1 SV=3	MAPK14	0.998479	6.03326e-22	194.65	HTDDEMT(0.002)GY(0.998)VATR	2	0.15731	7	0.603595	0.666667	0.628385	1.48511	1.44154	1.34816
hsa04912 GnRH signaling pathway	0.64	3	0.94	P0DP25	102	1.304	Up	0.00041989	S	Calmodulin-3 OS=Homo sapiens OX=9606 GN=CALM3 PE=1 SV=1	CALM3	1	0.000220671	86.987	VFDKDGNGYIS(1)AAELR	3	0.004572	1	0.860182	0.856137	0.893194	1.17683	1.09606	1.12946
hsa04912 GnRH signaling pathway	0.64	3	0.94	Q9Y6R4	1252	1.465	Up	3.9531e-05	S	Mitogen-activated protein kinase kinase kinase 4 OS=Homo sapiens OX=9606 GN=MAP3K4 PE=1 SV=2	MAP3K4	0.87522	4.75611e-24	191.36	HS(0.026)S(0.875)PT(0.098)EERDEPAYPR	3	-0.34954	1	0.8	0.814021	0.836288	1.16698	1.22688	1.19626
hsa04912 GnRH signaling pathway	0.64	3	0.94	Q9Y6R4	214	3.185	Up	0.0022377	S	Mitogen-activated protein kinase kinase kinase 4 OS=Homo sapiens OX=9606 GN=MAP3K4 PE=1 SV=2	MAP3K4	0.818797	0.00112934	79.652	QT(0.173)S(0.819)RT(0.008)DCPADR	2	-0.63846	1	0.557672	0.533593	0.364964	1.2584	1.74086	1.63925
hsa04024 cAMP signaling pathway	0.956695	2	0.43	P0DP25	102	1.304	Up	0.00041989	S	Calmodulin-3 OS=Homo sapiens OX=9606 GN=CALM3 PE=1 SV=1	CALM3	1	0.000220671	86.987	VFDKDGNGYIS(1)AAELR	3	0.004572	1	0.860182	0.856137	0.893194	1.17683	1.09606	1.12946
hsa04024 cAMP signaling pathway	0.956695	2	0.43	O14974	871	1.287	Up	0.048356	S	Protein phosphatase 1 regulatory subunit 12A OS=Homo sapiens OX=9606 GN=PPP1R12A PE=1 SV=1	PPP1R12A	0.970474	5.92247e-68	268.3	STGVSFWTQDSDENEQEQQS(0.97)DT(0.029)EEGSNKK	4	-0.88047	1	0.846008	0.805634	0.976407	1.14407	1.12945	1.1093
hsa00310 Lysine degradation	0.516686	3	1.12	Q03164	337	1.235	Up	0.020636	T	Histone-lysine N-methyltransferase 2A OS=Homo sapiens OX=9606 GN=KMT2A PE=1 SV=5	KMT2A	0.998224	0.00517325	57.434	DKEGT(0.998)PPLT(0.002)K	4	3.4573	1	0.881256	0.908602	0.93254	1.00949	1.21209	1.14186
hsa00310 Lysine degradation	0.516686	3	1.12	Q03164	532	1.485	Up	0.0254	S	Histone-lysine N-methyltransferase 2A OS=Homo sapiens OX=9606 GN=KMT2A PE=1 SV=5	KMT2A	0.968259	0.0344149	43.308	RY(0.03)S(0.968)VS(0.002)ER	3	-0.16616	1	0.872424	0.711828	0.875	1.07489	1.43954	1.13686
hsa00310 Lysine degradation	0.516686	3	1.12	Q03164	351	1.823	Up	0.0058417	S	Histone-lysine N-methyltransferase 2A OS=Homo sapiens OX=9606 GN=KMT2A PE=1 SV=5	KMT2A	0.999921	0.00838154	69.216	TVVRQS(1)PR	2	-0.25845	1	0.672228	0.890323	0.616071	1.39241	1.30518	1.27373
hsa00310 Lysine degradation	0.516686	3	1.12	P51648	293	2.199	Up	0.024818	S	Fatty aldehyde dehydrogenase OS=Homo sapiens OX=9606 GN=ALDH3A2 PE=1 SV=1	ALDH3A2	1	0.0232812	40.727	ILS(1)LLEGQK	3	-0.47646	1	0.890503	0.609589	0.418217	1.23077	1.32709	1.66071
hsa00310 Lysine degradation	0.516686	3	1.12	O14686	1606	1.479	Up	0.0051827	S	Histone-lysine N-methyltransferase 2D OS=Homo sapiens OX=9606 GN=KMT2D PE=1 SV=2	KMT2D	0.996818	8.05204e-05	105.65	NLT(0.003)MS(0.997)PLHK	3	0.31656	1	0.898537	0.81044	0.753351	1.18182	1.12965	1.3305
hsa00010 Glycolysis / Gluconeogenesis	0.218439	4	1.64	P51648	293	2.199	Up	0.024818	S	Fatty aldehyde dehydrogenase OS=Homo sapiens OX=9606 GN=ALDH3A2 PE=1 SV=1	ALDH3A2	1	0.0232812	40.727	ILS(1)LLEGQK	3	-0.47646	1	0.890503	0.609589	0.418217	1.23077	1.32709	1.66071
hsa00010 Glycolysis / Gluconeogenesis	0.218439	4	1.64	P17858	775	1.607	Up	0.0032178	S	ATP-dependent 6-phosphofructokinase, liver type OS=Homo sapiens OX=9606 GN=PFKL PE=1 SV=6	PFKL	0.998656	0.000204798	94.688	RT(0.001)LS(0.999)MDK	3	0.30762	2	0.890542	0.706861	0.730489	1.21954	1.21528	1.30616
hsa00010 Glycolysis / Gluconeogenesis	0.218439	4	1.64	P17858	773	1.533	Up	0.00042209	T	ATP-dependent 6-phosphofructokinase, liver type OS=Homo sapiens OX=9606 GN=PFKL PE=1 SV=6	PFKL	0.939626	0.00104982	97.734	T(0.94)LS(0.06)MDKGF	2	0.77738	2	0.816153	0.79106	0.78564	1.27466	1.13234	1.26143
hsa00010 Glycolysis / Gluconeogenesis	0.218439	4	1.64	P36871	117	1.45	Up	7.5365e-05	S	Phosphoglucomutase-1 OS=Homo sapiens OX=9606 GN=PGM1 PE=1 SV=3	PGM1	0.99941	5.8922e-32	216.64	AIGGIILT(0.001)AS(0.999)HNPGGPNGDFGIK	2	1.0916	12	0.830151	0.863302	0.80746	1.18924	1.2058	1.23173
hsa00010 Glycolysis / Gluconeogenesis	0.218439	4	1.64	P14618	249	1.211	Up	0.035662	S	Pyruvate kinase PKM OS=Homo sapiens OX=9606 GN=PKM PE=1 SV=4	PKM	1	0.00129665	76.357	KAS(1)DVHEVR	4	-0.011322	2	0.89881	0.886026	0.946482	1.07614	1.22467	1.00798
hsa00640 Propanoate metabolism	0.561346	1	1.3	P12694	347	1.298	Up	0.00042319	S	2-oxoisovalerate dehydrogenase subunit alpha, mitochondrial OS=Homo sapiens OX=9606 GN=BCKDHA PE=1 SV=2	BCKDHA	1	1.12243e-16	178.23	S(1)VDEVNYWDK	2	0.65946	4	0.894587	0.881592	0.853831	1.09305	1.16531	1.15438
hsa05130 Pathogenic Escherichia coli infection	0.721674	2	0.82	P07437	172	1.385	Up	0.000179802	S	Tubulin beta chain OS=Homo sapiens OX=9606 GN=TUBB PE=1 SV=2	TUBB	0.997835	8.00409e-05	85.554	IMNTFS(0.002)VVPS(0.998)PK	3	-0.5506	4	0.848756	0.813527	0.880228	1.1734	1.1565	1.19157
hsa05130 Pathogenic Escherichia coli infection	0.721674	2	0.82	P07437	40	1.369	Up	0.0033589	S	Tubulin beta chain OS=Homo sapiens OX=9606 GN=TUBB PE=1 SV=2	TUBB	0.983273	1.21144e-17	160.45	FWEVISDEHGIDPT(0.001)GT(0.016)YHGDS(0.983)DLQLDR	4	-1.4045	2	0.79005	0.894686	0.86692	1.16383	1.09654	1.2327
hsa05130 Pathogenic Escherichia coli infection	0.721674	2	0.82	P07437	285	2.476	Up	0.000124214	T	Tubulin beta chain OS=Homo sapiens OX=9606 GN=TUBB PE=1 SV=2	TUBB	0.998826	1.69394e-16	165.66	ALT(0.999)VPELT(0.001)QQVFDAK	3	0.87042	1	0.641791	0.568116	0.576996	1.56489	1.52337	1.33601
hsa05130 Pathogenic Escherichia coli infection	0.721674	2	0.82	Q92974	142	1.316	Up	0.0051386	S	Rho guanine nucleotide exchange factor 2 OS=Homo sapiens OX=9606 GN=ARHGEF2 PE=1 SV=4	ARHGEF2	0.959925	0.00105538	72.731	S(0.96)S(0.036)LS(0.004)LAK	2	0.10198	2	0.930399	0.831207	0.87051	1.07615	1.16579	1.22119
hsa05130 Pathogenic Escherichia coli infection	0.721674	2	0.82	Q92974	645	1.455	Up	0.029299	S	Rho guanine nucleotide exchange factor 2 OS=Homo sapiens OX=9606 GN=ARHGEF2 PE=1 SV=4	ARHGEF2	0.968061	5.9359e-05	123.79	S(0.006)ES(0.968)LES(0.026)PR	2	-0.32292	2	1	0.773307	0.724008	1.33066	1.08499	1.21914
hsa04151 PI3K-Akt signaling pathway	0.985596	3	0.4	Q13131	524	1.223	Up	0.041024	S	5'-AMP-activated protein kinase catalytic subunit alpha-1 OS=Homo sapiens OX=9606 GN=PRKAA1 PE=1 SV=4	PRKAA1	0.818051	1.36024e-07	120.05	SSEVS(0.001)LT(0.029)S(0.151)S(0.818)VT(0.007)S(0.991)LDS(0.002)SPVDLTPR	3	0.64002	3	0.820746	0.947162	0.923009	1.20225	1.07925	1.00904
hsa04151 PI3K-Akt signaling pathway	0.985596	3	0.4	P13807	727	1.212	Up	0.036422	S	Glycogen [starch] synthase, muscle OS=Homo sapiens OX=9606 GN=GYS1 PE=1 SV=2	GYS1	0.907573	1.31659e-17	158.16	NSVDTATSSSLST(0.001)PS(0.008)EPLS(0.908)PT(0.055)S(0.012)S(0.017)LGEER	3	0.068497	1	0.805301	0.928736	0.980553	1.08566	1.05922	1.14395
hsa04151 PI3K-Akt signaling pathway	0.985596	3	0.4	Q9UBS0	416	2.556	Up	0.00142006	S	Ribosomal protein S6 kinase beta-2 OS=Homo sapiens OX=9606 GN=RPS6KB2 PE=1 SV=2	RPS6KB2	0.994398	0.00771359	64.841	RLNS(0.994)S(0.006)PR	3	-0.54426	1	0.665977	0.612967	0.456459	1.3966	1.58972	1.4494
hsa00040 Pentose and glucuronate interconversions	0.128093	1	7.81	O60701	476	1.327	Up	0.0030169	S	UDP-glucose 6-dehydrogenase OS=Homo sapiens OX=9606 GN=UGDH PE=1 SV=1	UGDH	0.999846	0.0185742	46.156	RIPYAPS(1)GEIPK	3	0.29322	1	0.86359	0.831967	0.896733	1.1763	1.06213	1.20229
hsa05031 Amphetamine addiction	0.889871	1	0.49	P0DP25	102	1.304	Up	0.00041989	S	Calmodulin-3 OS=Homo sapiens OX=9606 GN=CALM3 PE=1 SV=1	CALM3	1	0.000220671	86.987	VFDKDGNGYIS(1)AAELR	3	0.004572	1	0.860182	0.856137	0.893194	1.17683	1.09606	1.12946
hsa04217 Necroptosis	0.523658	5	1.05	Q9UN37	99	1.215	Up	0.020362	S	Vacuolar protein sorting-associated protein 4A OS=Homo sapiens OX=9606 GN=VPS4A PE=1 SV=1	VPS4A	1	6.829e-28	201.18	GSDS(1)DS(1)EGDNPEK	2	0.21803	4	0.962428	0.935419	0.83619	1.07817	1.17414	1.0683
hsa04217 Necroptosis	0.523658	5	1.05	Q9UN37	97	1.205	Up	0.025835	S	Vacuolar protein sorting-associated protein 4A OS=Homo sapiens OX=9606 GN=VPS4A PE=1 SV=1	VPS4A	0.999897	2.60546e-36	218.83	ENQS(0.003)EGKGS(0.998)DS(1)DS(1)EGDNPEKK	4	0.081956	11	0.957611	0.937437	0.849524	1.05584	1.19082	1.06116
hsa04217 Necroptosis	0.523658	5	1.05	Q13546	320	1.508	Up	0.0105427	S	Receptor-interacting serine/threonine-protein kinase 1 OS=Homo sapiens OX=9606 GN=RIPK1 PE=1 SV=3	RIPK1	1	6.96758e-05	92.289	MQS(1)LQLDCVAVPSSR	2	-0.26441	2	0.750795	0.850431	0.845521	1.39956	1.22883	1.06155
hsa04217 Necroptosis	0.523658	5	1.05	Q9BY43	196	1.51	Up	0.027722	S	Charged multivesicular body protein 4a OS=Homo sapiens OX=9606 GN=CHMP4A PE=1 SV=3	CHMP4A	0.795623	9.92339e-08	127.83	LPS(0.089)VPS(0.796)T(0.116)HLPAGPAPK	4	-0.19766	1	0.906924	0.723014	0.747515	1.18505	1.1933	1.21186
hsa04217 Necroptosis	0.523658	5	1.05	P16104	137	1.325	Up	0.0173591	T	Histone H2AX OS=Homo sapiens OX=9606 GN=H2AFX PE=1 SV=2	H2AFX	0.997749	0.0235602	63.091	KAT(0.998)QAS(0.406)QEY(0.597)	2	-0.28837	1	0.912811	0.93462	0.768145	1.2296	1.07862	1.15709
hsa04217 Necroptosis	0.523658	5	1.05	O00429	529	1.488	Up	0.00134434	S	Dynamin-1-like protein OS=Homo sapiens OX=9606 GN=DNM1L PE=1 SV=2	DNM1L	0.986969	0.00934587	51.726	ELPS(0.013)AVS(0.987)RDK	3	0.23539	1	0.887967	0.770217	0.800834	1.2387	1.15713	1.26294
hsa05230 Central carbon metabolism in cancer	0.748244	2	0.78	P17858	775	1.607	Up	0.0032178	S	ATP-dependent 6-phosphofructokinase, liver type OS=Homo sapiens OX=9606 GN=PFKL PE=1 SV=6	PFKL	0.998656	0.000204798	94.688	RT(0.001)LS(0.999)MDK	3	0.30762	2	0.890542	0.706861	0.730489	1.21954	1.21528	1.30616
hsa05230 Central carbon metabolism in cancer	0.748244	2	0.78	P17858	773	1.533	Up	0.00042209	T	ATP-dependent 6-phosphofructokinase, liver type OS=Homo sapiens OX=9606 GN=PFKL PE=1 SV=6	PFKL	0.939626	0.00104982	97.734	T(0.94)LS(0.06)MDKGF	2	0.77738	2	0.816153	0.79106	0.78564	1.27466	1.13234	1.26143
hsa05230 Central carbon metabolism in cancer	0.748244	2	0.78	P14618	249	1.211	Up	0.035662	S	Pyruvate kinase PKM OS=Homo sapiens OX=9606 GN=PKM PE=1 SV=4	PKM	1	0.00129665	76.357	KAS(1)DVHEVR	4	-0.011322	2	0.89881	0.886026	0.946482	1.07614	1.22467	1.00798

## Sheet: Down Pathway2Protein
KEGG pathway	Fisher's exact test p value	Mapping	Fold enrichment	Protein accession	Position	Ratio	Regulated Type	P value	Amino acid	Protein description	Gene name	Localization probability	PEP	Score	Modified sequence	Charge	Mass error [ppm]	MS/MS Count	JCTRL_1	JCTRL_2	JCTRL_3	JSH_1	JSH_2	JSH_3
hsa04014 Ras signaling pathway	0.0253681	13	1.74	O96013	207	0.804	Down	0.0049751	T	Serine/threonine-protein kinase PAK 4 OS=Homo sapiens OX=9606 GN=PAK4 PE=1 SV=1	PAK4	0.999979	0.000301264	80.632	LAAGRPFNT(1)YPR	3	-0.35196	1	1.12009	1.1469	1.06219	0.853591	0.874877	0.948156
hsa04014 Ras signaling pathway	0.0253681	13	1.74	P17252	497	0.556	Down	0.0033406	T	Protein kinase C alpha type OS=Homo sapiens OX=9606 GN=PRKCA PE=1 SV=4	PRKCA	0.995374	1.9459e-81	290.44	T(0.995)FCGT(0.005)PDYIAPEIIAYQPYGK	4	-0.46556	5	1.39259	1.15755	1.19528	0.594895	0.754116	0.734164
hsa04014 Ras signaling pathway	0.0253681	13	1.74	P21359	864	0.785	Down	0.019982	S	Neurofibromin OS=Homo sapiens OX=9606 GN=NF1 PE=1 SV=2	NF1	0.985655	0.000271585	76.889	SNSGLAT(0.014)YS(0.986)PPMGPVSER	3	-1.0637	1	1.18057	1.05711	1.15451	0.964728	0.901179	0.79771
hsa04014 Ras signaling pathway	0.0253681	13	1.74	P21359	2597	0.812	Down	0.0076791	S	Neurofibromin OS=Homo sapiens OX=9606 GN=NF1 PE=1 SV=2	NF1	0.993108	6.19161e-32	214.17	KVS(0.993)VS(0.007)ESNVLLDEEVLTDPK	4	1.2247	2	1.11827	1.11961	1.09227	0.85224	0.874887	0.976145
hsa04014 Ras signaling pathway	0.0253681	13	1.74	P36507	306	0.695	Down	0.0148639	S	Dual specificity mitogen-activated protein kinase kinase 2 OS=Homo sapiens OX=9606 GN=MAP2K2 PE=1 SV=1	MAP2K2	0.999855	0.0114831	47.75	PRPPGRPVS(1)GHGMDSR	4	-1.4169	2	1.32853	1.15015	1.03137	0.736426	0.838773	0.863281
hsa04014 Ras signaling pathway	0.0253681	13	1.74	Q86YV0	819	0.729	Down	0.0069028	S	RAS protein activator like-3 OS=Homo sapiens OX=9606 GN=RASAL3 PE=1 SV=2	RASAL3	0.99135	0.00602482	66.19	T(0.009)QS(0.991)VPVR	2	-0.59128	2	1.23913	1.06213	1.16701	0.777996	0.900101	0.850312
hsa04014 Ras signaling pathway	0.0253681	13	1.74	Q86YV0	796	0.659	Down	0.041663	S	RAS protein activator like-3 OS=Homo sapiens OX=9606 GN=RASAL3 PE=1 SV=2	RASAL3	0.999833	0.00216257	91.265	RSES(1)WAR	3	0.70714	1	1.03063	1.15187	1.41955	0.702358	0.967709	0.703742
hsa04014 Ras signaling pathway	0.0253681	13	1.74	Q86YV0	994	0.815	Down	0.026858	S	RAS protein activator like-3 OS=Homo sapiens OX=9606 GN=RASAL3 PE=1 SV=2	RASAL3	0.996427	5.61252e-05	96.745	GS(0.996)WS(0.004)QPQPLK	3	-0.05749	1	1.03953	1.04931	1.222	0.850688	0.918264	0.929314
hsa04014 Ras signaling pathway	0.0253681	13	1.74	Q86YV0	72	0.76	Down	1.86698e-05	S	RAS protein activator like-3 OS=Homo sapiens OX=9606 GN=RASAL3 PE=1 SV=2	RASAL3	1	0.00692557	65.224	VLS(1)APPK	2	0.19721	4	1.14032	1.12821	1.13646	0.847741	0.879919	0.858628
hsa04014 Ras signaling pathway	0.0253681	13	1.74	Q86YV0	831	0.807	Down	0.0180212	S	RAS protein activator like-3 OS=Homo sapiens OX=9606 GN=RASAL3 PE=1 SV=2	RASAL3	1	0.000400365	91.961	RQS(1)AGPWPR	3	-0.24908	3	1.04644	1.07101	1.2057	0.899804	0.942482	0.839917
hsa04014 Ras signaling pathway	0.0253681	13	1.74	Q86YV0	51	0.811	Down	0.0115587	S	RAS protein activator like-3 OS=Homo sapiens OX=9606 GN=RASAL3 PE=1 SV=2	RASAL3	1	3.75465e-23	190.31	ALS(1)HQEPMVSTQPAPR	3	-0.29508	7	1.09684	1.05917	1.1609	0.85167	0.870838	0.967775
hsa04014 Ras signaling pathway	0.0253681	13	1.74	Q13177	64	0.447	Down	0.00043612	S	Serine/threonine-protein kinase PAK 2 OS=Homo sapiens OX=9606 GN=PAK2 PE=1 SV=3	PAK2	0.999442	5.257e-12	149.52	IISIFSGT(0.001)EKGS(0.999)K	3	1.0594	1	1.39749	1.33236	1.3204	0.518782	0.631407	0.659136
hsa04014 Ras signaling pathway	0.0253681	13	1.74	Q13177	141	0.759	Down	0.026596	S	Serine/threonine-protein kinase PAK 2 OS=Homo sapiens OX=9606 GN=PAK2 PE=1 SV=3	PAK2	0.989003	9.27077e-23	176.53	YLS(0.989)FT(0.011)PPEKDGFPSGTPALNAK	3	0.010631	8	1.11509	1.14133	1.13433	0.787817	0.922574	0.862475
hsa04014 Ras signaling pathway	0.0253681	13	1.74	Q13177	143	0.729	Down	0.00164278	T	Serine/threonine-protein kinase PAK 2 OS=Homo sapiens OX=9606 GN=PAK2 PE=1 SV=3	PAK2	0.998069	1.27539e-07	147.63	YLS(0.002)FT(0.998)PPEK	3	-0.45105	7	1.12476	1.154	1.16517	0.779695	0.897492	0.834971
hsa04014 Ras signaling pathway	0.0253681	13	1.74	P20339	193	0.623	Down	0.0026193	S	Ras-related protein Rab-5A OS=Homo sapiens OX=9606 GN=RAB5A PE=1 SV=2	RAB5A	1	1.48385e-07	122.14	NEPQNPGANS(1)AR	3	0.50468	3	1.29517	1.18857	1.18438	0.862069	0.728008	0.696203
hsa04014 Ras signaling pathway	0.0253681	13	1.74	P29353	139	0.543	Down	0.00030018	S	SHC-transforming protein 1 OS=Homo sapiens OX=9606 GN=SHC1 PE=1 SV=4	SHC1	0.999993	0.00167172	64.224	HGS(1)FVNKPTR	4	-0.306	1	1.32089	1.16622	1.29894	0.686165	0.644664	0.725825
hsa04014 Ras signaling pathway	0.0253681	13	1.74	Q7LDG7	576	0.683	Down	0.0065568	S	RAS guanyl-releasing protein 2 OS=Homo sapiens OX=9606 GN=RASGRP2 PE=1 SV=1	RASGRP2	0.99837	0.000103531	117.7	AFS(0.998)FS(0.002)LPRPGR	3	-0.42913	3	1.09429	1.21435	1.17734	0.793933	0.796537	0.789364
hsa04014 Ras signaling pathway	0.0253681	13	1.74	P14921	38	0.64	Down	0.00053992	T	Protein C-ets-1 OS=Homo sapiens OX=9606 GN=ETS1 PE=1 SV=1	ETS1	0.921818	3.68925e-05	81.001	VDLELFPSPDMECADVPLLT(0.922)PS(0.058)S(0.02)K	4	0.41793	5	1.16004	1.18876	1.30346	0.819388	0.767283	0.751161
hsa04014 Ras signaling pathway	0.0253681	13	1.74	P14921	251	0.703	Down	0.00135919	S	Protein C-ets-1 OS=Homo sapiens OX=9606 GN=ETS1 PE=1 SV=1	ETS1	0.99868	1.23783e-31	213.82	LGGQDS(0.999)FES(0.001)IESYDSCDR	3	-0.12404	2	1.13618	1.16165	1.22246	0.882653	0.819864	0.771588
hsa04014 Ras signaling pathway	0.0253681	13	1.74	P14921	273	0.652	Down	0.00026049	S	Protein C-ets-1 OS=Homo sapiens OX=9606 GN=ETS1 PE=1 SV=1	ETS1	0.972074	1.54752e-31	206.11	LTQSWSSQS(0.028)S(0.972)FNSLQR	2	0.53395	2	1.167	1.21185	1.24514	0.833673	0.775073	0.754875
hsa04014 Ras signaling pathway	0.0253681	13	1.74	Q13009	231	0.833	Down	0.0070827	S	T-lymphoma invasion and metastasis-inducing protein 1 OS=Homo sapiens OX=9606 GN=TIAM1 PE=1 SV=2	TIAM1	0.995004	0.000153079	83.633	ANS(0.995)LGDLY(0.005)AQK	3	0.013812	1	1.14145	1.1209	1.02243	0.916045	0.894347	0.927052
hsa04014 Ras signaling pathway	0.0253681	13	1.74	P17612	198	0.632	Down	0.000102671	T	cAMP-dependent protein kinase catalytic subunit alpha OS=Homo sapiens OX=9606 GN=PRKACA PE=1 SV=2	PRKACA	0.985721	1.71589e-53	251.29	T(0.009)WT(0.986)LCGT(0.005)PEYLAPEIILSK	2	0.23372	4	1.2387	1.16367	1.20218	0.758099	0.729104	0.791845
hsa04014 Ras signaling pathway	0.0253681	13	1.74	P05771	500	0.478	Down	0.00093695	T	Protein kinase C beta type OS=Homo sapiens OX=9606 GN=PRKCB PE=1 SV=4	PRKCB	0.995374	1.9459e-81	290.44	T(0.995)FCGT(0.005)PDYIAPEIIAYQPYGK	4	-0.46556	6	1.5464	1.18244	1.30737	0.608791	0.644283	0.674528
hsa04014 Ras signaling pathway	0.0253681	13	1.74	P05771	504	0.692	Down	0.00020151	T	Protein kinase C beta type OS=Homo sapiens OX=9606 GN=PRKCB PE=1 SV=4	PRKCB	0.80982	4.41108e-11	148.75	T(0.19)FCGT(0.81)PDYIAPEIIAYQPYGK	3	0.69537	2	1.18248	1.20488	1.13603	0.825275	0.834846	0.776415
hsa04622 RIG-I-like receptor signaling pathway	0.965278	1	0.33	O00571	74	0.591	Down	0.0037843	S	ATP-dependent RNA helicase DDX3X OS=Homo sapiens OX=9606 GN=DDX3X PE=1 SV=3	DDX3X	0.998503	9.08988e-05	86.497	DKDAYSS(0.001)FGS(0.999)R	3	-0.032918	1	1.31435	1.27463	1.16816	0.834511	0.633045	0.752239
hsa04622 RIG-I-like receptor signaling pathway	0.965278	1	0.33	O00571	612	0.647	Down	0.00199666	S	ATP-dependent RNA helicase DDX3X OS=Homo sapiens OX=9606 GN=DDX3X PE=1 SV=3	DDX3X	0.932491	4.81154e-05	95.429	QSSGASS(0.006)S(0.058)S(0.932)FS(0.002)SSR	2	0.32894	2	1.29747	1.22488	1.10945	0.792129	0.726225	0.831841
hsa04622 RIG-I-like receptor signaling pathway	0.965278	1	0.33	O00571	90	0.697	Down	0.00031862	S	ATP-dependent RNA helicase DDX3X OS=Homo sapiens OX=9606 GN=DDX3X PE=1 SV=3	DDX3X	0.951341	0.00936803	63.462	SSFFS(0.005)DRGS(0.951)GS(0.044)R	3	0.10031	2	1.16983	1.14925	1.20896	0.860747	0.782901	0.814925
hsa04622 RIG-I-like receptor signaling pathway	0.965278	1	0.33	O00571	594	0.767	Down	0.0132407	S	ATP-dependent RNA helicase DDX3X OS=Homo sapiens OX=9606 GN=DDX3X PE=1 SV=3	DDX3X	1	0.00844407	60.167	FS(1)GGFGAR	2	0.022108	2	1.14557	1.23582	1.00597	0.887992	0.845341	0.864677
hsa04622 RIG-I-like receptor signaling pathway	0.965278	1	0.33	O00571	102	0.716	Down	0.004839	S	ATP-dependent RNA helicase DDX3X OS=Homo sapiens OX=9606 GN=DDX3X PE=1 SV=3	DDX3X	0.999971	9.93109e-05	94.45	GRS(1)DYDGIGSR	2	-1.8922	1	1.12342	1.28657	1.06766	0.822402	0.807877	0.859701
hsa04622 RIG-I-like receptor signaling pathway	0.965278	1	0.33	O00571	109	0.79	Down	0.00104224	S	ATP-dependent RNA helicase DDX3X OS=Homo sapiens OX=9606 GN=DDX3X PE=1 SV=3	DDX3X	0.999999	0.00156426	73.296	SDYDGIGS(1)RGDR	2	-1.6608	1	1.14873	1.12239	1.0796	0.848638	0.912584	0.884577
hsa04622 RIG-I-like receptor signaling pathway	0.965278	1	0.33	O00571	82	0.697	Down	0.0035984	S	ATP-dependent RNA helicase DDX3X OS=Homo sapiens OX=9606 GN=DDX3X PE=1 SV=3	DDX3X	0.971209	0.000248451	93.839	GKS(0.971)S(0.029)FFSDR	3	-0.51563	3	1.25105	1.15224	1.12637	0.834511	0.744476	0.881592
hsa04622 RIG-I-like receptor signaling pathway	0.965278	1	0.33	O00571	609	0.815	Down	0.0063553	S	ATP-dependent RNA helicase DDX3X OS=Homo sapiens OX=9606 GN=DDX3X PE=1 SV=3	DDX3X	0.97646	7.16068e-16	159.06	QSS(0.001)GAS(0.976)S(0.021)S(0.001)SFSSSR	2	0.10646	1	1.0981	1.14527	1.0607	0.944501	0.845341	0.903483
hsa04923 Regulation of lipolysis in adipocytes	0.431711	2	1.4	Q96AD5	391	0.682	Down	0.0084204	S	Patatin-like phospholipase domain-containing protein 2 OS=Homo sapiens OX=9606 GN=PNPLA2 PE=1 SV=1	PNPLA2	1	0.00152503	65.231	HLPS(1)RLPEQVELR	3	0.91991	1	1.2645	1.11352	1.17021	0.924569	0.744279	0.751201
hsa04923 Regulation of lipolysis in adipocytes	0.431711	2	1.4	P17612	198	0.632	Down	0.000102671	T	cAMP-dependent protein kinase catalytic subunit alpha OS=Homo sapiens OX=9606 GN=PRKACA PE=1 SV=2	PRKACA	0.985721	1.71589e-53	251.29	T(0.009)WT(0.986)LCGT(0.005)PEYLAPEIILSK	2	0.23372	4	1.2387	1.16367	1.20218	0.758099	0.729104	0.791845
hsa05224 Breast cancer	0.219232	7	1.4	P42345	2448	0.83	Down	0.0090564	S	Serine/threonine-protein kinase mTOR OS=Homo sapiens OX=9606 GN=MTOR PE=1 SV=1	MTOR	0.805907	4.74526e-23	180.79	T(0.173)DS(0.806)YS(0.021)AGQSVEILDGVELGEPAHK	3	0.87519	2	1.11547	1.11778	1.04615	0.858614	0.962049	0.900875
hsa05224 Breast cancer	0.219232	7	1.4	P36507	306	0.695	Down	0.0148639	S	Dual specificity mitogen-activated protein kinase kinase 2 OS=Homo sapiens OX=9606 GN=MAP2K2 PE=1 SV=1	MAP2K2	0.999855	0.0114831	47.75	PRPPGRPVS(1)GHGMDSR	4	-1.4169	2	1.32853	1.15015	1.03137	0.736426	0.838773	0.863281
hsa05224 Breast cancer	0.219232	7	1.4	P06400	866	0.604	Down	0.00020446	S	Retinoblastoma-associated protein OS=Homo sapiens OX=9606 GN=RB1 PE=1 SV=2	RB1	0.999535	0.000334169	75.018	SAEGS(1)NPPKPLKK	3	0.67716	1	1.2809	1.23275	1.22143	0.750996	0.799603	0.704825
hsa05224 Breast cancer	0.219232	7	1.4	P06400	606	0.82	Down	0.0024033	Y	Retinoblastoma-associated protein OS=Homo sapiens OX=9606 GN=RB1 PE=1 SV=2	RB1	0.758945	9.41717e-06	73.227	EGPTDHLESACPLNLPLQNNHT(0.441)AADMY(0.759)LS(0.787)PVRS(0.012)PK	3	0.89538	3	1.12666	1.06797	1.10714	0.860558	0.935516	0.910123
hsa05224 Breast cancer	0.219232	7	1.4	Q9UBS0	423	0.742	Down	0.0148977	S	Ribosomal protein S6 kinase beta-2 OS=Homo sapiens OX=9606 GN=RPS6KB2 PE=1 SV=2	RPS6KB2	1	0.00567252	66.568	APVS(1)PLK	2	0.30862	2	1.20786	1.12967	1.08995	0.771483	0.962801	0.810516
hsa05224 Breast cancer	0.219232	7	1.4	P29353	139	0.543	Down	0.00030018	S	SHC-transforming protein 1 OS=Homo sapiens OX=9606 GN=SHC1 PE=1 SV=4	SHC1	0.999993	0.00167172	64.224	HGS(1)FVNKPTR	4	-0.306	1	1.32089	1.16622	1.29894	0.686165	0.644664	0.725825
hsa05224 Breast cancer	0.219232	7	1.4	P49841	25	0.731	Down	0.027898	S	Glycogen synthase kinase-3 beta OS=Homo sapiens OX=9606 GN=GSK3B PE=1 SV=2	GSK3B	0.874741	0.00134329	63.297	TTSFAESCKPVQQPS(0.125)AFGS(0.875)MK	4	-0.41305	1	1.28728	1.04314	1.14033	0.786368	0.968894	0.782038
hsa05224 Breast cancer	0.219232	7	1.4	P38398	1217	0.783	Down	0.024462	S	Breast cancer type 1 susceptibility protein OS=Homo sapiens OX=9606 GN=BRCA1 PE=1 SV=2	BRCA1	0.999402	7.82734e-13	151.23	KLES(0.744)S(0.258)EENLS(0.999)S(0.999)EDEELPCFQHLLFGK	4	-0.10735	4	0.990431	1.24281	1.12821	0.869652	0.909001	0.853705
hsa05224 Breast cancer	0.219232	7	1.4	P38398	1218	0.783	Down	0.024462	S	Breast cancer type 1 susceptibility protein OS=Homo sapiens OX=9606 GN=BRCA1 PE=1 SV=2	BRCA1	0.999638	7.82734e-13	151.23	KLESS(0.001)EENLS(0.999)S(1)EDEELPCFQHLLFGK	3	0.68017	4	0.990431	1.24281	1.12821	0.869652	0.909001	0.853705
hsa03008 Ribosome biogenesis in eukaryotes	0.951333	3	0.51	O00567	314	0.57	Down	0.0002993	S	Nucleolar protein 56 OS=Homo sapiens OX=9606 GN=NOP56 PE=1 SV=4	NOP56	0.998932	8.48705e-16	157.33	LIAHAGS(0.999)LT(0.001)NLAK	3	-1.9164	1	1.314	1.24814	1.32196	0.734072	0.795741	0.682375
hsa03008 Ribosome biogenesis in eukaryotes	0.951333	3	0.51	O00567	569	0.827	Down	0.0067182	S	Nucleolar protein 56 OS=Homo sapiens OX=9606 GN=NOP56 PE=1 SV=4	NOP56	1	2.53731e-16	170.16	EEPVS(1)S(1)GPEEAVGK	2	-0.4401	9	1.15427	1.07317	1.09701	0.865189	0.957406	0.927427
hsa03008 Ribosome biogenesis in eukaryotes	0.951333	3	0.51	Q9H0D6	451	0.608	Down	0.011722	S	5'-3' exoribonuclease 2 OS=Homo sapiens OX=9606 GN=XRN2 PE=1 SV=1	XRN2	0.992289	9.37665e-05	86.488	NS(0.007)PGS(0.992)QVASNPR	2	-0.94613	1	1.28676	1.30777	1.09316	0.747515	0.874877	0.620553
hsa03008 Ribosome biogenesis in eukaryotes	0.951333	3	0.51	P78346	251	0.696	Down	0.0103249	S	Ribonuclease P protein subunit p30 OS=Homo sapiens OX=9606 GN=RPP30 PE=1 SV=1	RPP30	1	4.78194e-07	115.84	KPRPS(1)EGDEDCLPASK	3	0.027937	2	1.24561	1.09329	1.23206	0.721831	0.857002	0.905975
hsa04360 Axon guidance	0.327211	9	1.2	O96013	207	0.804	Down	0.0049751	T	Serine/threonine-protein kinase PAK 4 OS=Homo sapiens OX=9606 GN=PAK4 PE=1 SV=1	PAK4	0.999979	0.000301264	80.632	LAAGRPFNT(1)YPR	3	-0.35196	1	1.12009	1.1469	1.06219	0.853591	0.874877	0.948156
hsa04360 Axon guidance	0.327211	9	1.2	O14639	586	0.721	Down	0.0144971	S	Actin-binding LIM protein 1 OS=Homo sapiens OX=9606 GN=ABLIM1 PE=1 SV=3	ABLIM1	0.975752	1.92075e-08	128.79	S(0.976)S(0.024)GREEDDEELLR	3	0.25947	1	1.11359	1.15749	1.31067	0.916309	0.908608	0.756076
hsa04360 Axon guidance	0.327211	9	1.2	P17252	497	0.556	Down	0.0033406	T	Protein kinase C alpha type OS=Homo sapiens OX=9606 GN=PRKCA PE=1 SV=4	PRKCA	0.995374	1.9459e-81	290.44	T(0.995)FCGT(0.005)PDYIAPEIIAYQPYGK	4	-0.46556	5	1.39259	1.15755	1.19528	0.594895	0.754116	0.734164
hsa04360 Axon guidance	0.327211	9	1.2	Q13177	64	0.447	Down	0.00043612	S	Serine/threonine-protein kinase PAK 2 OS=Homo sapiens OX=9606 GN=PAK2 PE=1 SV=3	PAK2	0.999442	5.257e-12	149.52	IISIFSGT(0.001)EKGS(0.999)K	3	1.0594	1	1.39749	1.33236	1.3204	0.518782	0.631407	0.659136
hsa04360 Axon guidance	0.327211	9	1.2	Q13177	141	0.759	Down	0.026596	S	Serine/threonine-protein kinase PAK 2 OS=Homo sapiens OX=9606 GN=PAK2 PE=1 SV=3	PAK2	0.989003	9.27077e-23	176.53	YLS(0.989)FT(0.011)PPEKDGFPSGTPALNAK	3	0.010631	8	1.11509	1.14133	1.13433	0.787817	0.922574	0.862475
hsa04360 Axon guidance	0.327211	9	1.2	Q13177	143	0.729	Down	0.00164278	T	Serine/threonine-protein kinase PAK 2 OS=Homo sapiens OX=9606 GN=PAK2 PE=1 SV=3	PAK2	0.998069	1.27539e-07	147.63	YLS(0.002)FT(0.998)PPEK	3	-0.45105	7	1.12476	1.154	1.16517	0.779695	0.897492	0.834971
hsa04360 Axon guidance	0.327211	9	1.2	P61073	324	0.701	Down	0.0054784	S	C-X-C chemokine receptor type 4 OS=Homo sapiens OX=9606 GN=CXCR4 PE=1 SV=1	CXCR4	0.920219	0.00213128	63.823	T(0.001)S(0.001)AQHALT(0.382)S(0.613)VS(0.087)RGS(0.92)S(0.997)LK	3	-0.23414	2	1.25606	1.16719	1.11144	0.780415	0.777385	0.918691
hsa04360 Axon guidance	0.327211	9	1.2	P61073	319	0.705	Down	0.003621	S	C-X-C chemokine receptor type 4 OS=Homo sapiens OX=9606 GN=CXCR4 PE=1 SV=1	CXCR4	0.760771	0.000301597	80.411	T(0.001)S(0.001)AQHALT(0.196)S(0.761)VS(0.693)RGS(0.691)S(0.658)LK	4	0.36454	4	1.22339	1.18286	1.11933	0.817013	0.759717	0.907075
hsa04360 Axon guidance	0.327211	9	1.2	P61073	325	0.701	Down	0.0054784	S	C-X-C chemokine receptor type 4 OS=Homo sapiens OX=9606 GN=CXCR4 PE=1 SV=1	CXCR4	0.99708	0.00213128	63.823	T(0.001)S(0.001)AQHALT(0.382)S(0.613)VS(0.087)RGS(0.92)S(0.997)LK	3	-0.23414	2	1.25606	1.16719	1.11144	0.780415	0.777385	0.918691
hsa04360 Axon guidance	0.327211	9	1.2	P53667	310	0.544	Down	0.0036611	S	LIM domain kinase 1 OS=Homo sapiens OX=9606 GN=LIMK1 PE=1 SV=3	LIMK1	0.993519	0.000814802	70.944	SPGAGS(0.003)LGS(0.994)PAS(0.004)QR	2	-1.7718	1	1.38047	1.09936	1.46207	0.649723	0.741463	0.753891
hsa04360 Axon guidance	0.327211	9	1.2	Q13464	1341	0.769	Down	0.00165903	S	Rho-associated protein kinase 1 OS=Homo sapiens OX=9606 GN=ROCK1 PE=1 SV=1	ROCK1	0.999984	0.0015088	73.273	STANQS(1)FRK	3	-0.19239	4	1.06273	1.13722	1.15035	0.840625	0.835176	0.901554
hsa04360 Axon guidance	0.327211	9	1.2	Q13555	381	0.796	Down	0.0101985	S	Calcium/calmodulin-dependent protein kinase type II subunit gamma OS=Homo sapiens OX=9606 GN=CAMK2G PE=1 SV=4	CAMK2G	0.973501	6.26352e-13	153.36	GS(0.974)T(0.026)ESCNTTTEDEDLK	3	0.16272	1	1.07271	1.04295	1.16169	0.933747	0.821096	0.855057
hsa04360 Axon guidance	0.327211	9	1.2	P49841	25	0.731	Down	0.027898	S	Glycogen synthase kinase-3 beta OS=Homo sapiens OX=9606 GN=GSK3B PE=1 SV=2	GSK3B	0.874741	0.00134329	63.297	TTSFAESCKPVQQPS(0.125)AFGS(0.875)MK	4	-0.41305	1	1.28728	1.04314	1.14033	0.786368	0.968894	0.782038
hsa05014 Amyotrophic lateral sclerosis (ALS)	0.860694	1	0.56	P20339	193	0.623	Down	0.0026193	S	Ras-related protein Rab-5A OS=Homo sapiens OX=9606 GN=RAB5A PE=1 SV=2	RAB5A	1	1.48385e-07	122.14	NEPQNPGANS(1)AR	3	0.50468	3	1.29517	1.18857	1.18438	0.862069	0.728008	0.696203
hsa05166 Human T-cell leukemia virus 1 infection	0.903378	9	0.72	P36507	306	0.695	Down	0.0148639	S	Dual specificity mitogen-activated protein kinase kinase 2 OS=Homo sapiens OX=9606 GN=MAP2K2 PE=1 SV=1	MAP2K2	0.999855	0.0114831	47.75	PRPPGRPVS(1)GHGMDSR	4	-1.4169	2	1.32853	1.15015	1.03137	0.736426	0.838773	0.863281
hsa05166 Human T-cell leukemia virus 1 infection	0.903378	9	0.72	P06400	866	0.604	Down	0.00020446	S	Retinoblastoma-associated protein OS=Homo sapiens OX=9606 GN=RB1 PE=1 SV=2	RB1	0.999535	0.000334169	75.018	SAEGS(1)NPPKPLKK	3	0.67716	1	1.2809	1.23275	1.22143	0.750996	0.799603	0.704825
hsa05166 Human T-cell leukemia virus 1 infection	0.903378	9	0.72	P06400	606	0.82	Down	0.0024033	Y	Retinoblastoma-associated protein OS=Homo sapiens OX=9606 GN=RB1 PE=1 SV=2	RB1	0.758945	9.41717e-06	73.227	EGPTDHLESACPLNLPLQNNHT(0.441)AADMY(0.759)LS(0.787)PVRS(0.012)PK	3	0.89538	3	1.12666	1.06797	1.10714	0.860558	0.935516	0.910123
hsa05166 Human T-cell leukemia virus 1 infection	0.903378	9	0.72	P11166	490	0.804	Down	0.033061	S	Solute carrier family 2, facilitated glucose transporter member 1 OS=Homo sapiens OX=9606 GN=SLC2A1 PE=1 SV=2	SLC2A1	0.999997	0.0016421	65.231	TPEELFHPLGADS(1)QV	3	-0.85549	1	1.22854	1.18885	0.994845	0.890386	0.930823	0.922925
hsa05166 Human T-cell leukemia virus 1 infection	0.903378	9	0.72	P11166	473	0.718	Down	0.035703	S	Solute carrier family 2, facilitated glucose transporter member 1 OS=Homo sapiens OX=9606 GN=SLC2A1 PE=1 SV=2	SLC2A1	0.923363	6.12552e-17	171.94	QGGAS(0.923)QS(0.069)DKT(0.007)PEELFHPLGADSQV	4	-0.80699	2	1.23821	1.36291	0.989691	0.906559	0.787215	0.883399
hsa05166 Human T-cell leukemia virus 1 infection	0.903378	9	0.72	P15923	156	0.69	Down	0.014096	S	Transcription factor E2-alpha OS=Homo sapiens OX=9606 GN=TCF3 PE=1 SV=1	TCF3	0.934735	2.18907e-07	120.79	GTSQYYPSYS(0.017)GS(0.935)S(0.048)R	2	0.034972	1	1.1107	1.14061	1.23778	0.933014	0.774302	0.698592
hsa05166 Human T-cell leukemia virus 1 infection	0.903378	9	0.72	P06239	192	0.769	Down	0.021855	Y	Tyrosine-protein kinase Lck OS=Homo sapiens OX=9606 GN=LCK PE=1 SV=6	LCK	0.999949	1.76854e-25	204.94	NLDNGGFY(1)ISPR	3	-0.12288	5	1.03582	1.18558	1.10636	0.844091	0.85497	0.858729
hsa05166 Human T-cell leukemia virus 1 infection	0.903378	9	0.72	P14921	38	0.64	Down	0.00053992	T	Protein C-ets-1 OS=Homo sapiens OX=9606 GN=ETS1 PE=1 SV=1	ETS1	0.921818	3.68925e-05	81.001	VDLELFPSPDMECADVPLLT(0.922)PS(0.058)S(0.02)K	4	0.41793	5	1.16004	1.18876	1.30346	0.819388	0.767283	0.751161
hsa05166 Human T-cell leukemia virus 1 infection	0.903378	9	0.72	P14921	251	0.703	Down	0.00135919	S	Protein C-ets-1 OS=Homo sapiens OX=9606 GN=ETS1 PE=1 SV=1	ETS1	0.99868	1.23783e-31	213.82	LGGQDS(0.999)FES(0.001)IESYDSCDR	3	-0.12404	2	1.13618	1.16165	1.22246	0.882653	0.819864	0.771588
hsa05166 Human T-cell leukemia virus 1 infection	0.903378	9	0.72	P14921	273	0.652	Down	0.00026049	S	Protein C-ets-1 OS=Homo sapiens OX=9606 GN=ETS1 PE=1 SV=1	ETS1	0.972074	1.54752e-31	206.11	LTQSWSSQS(0.028)S(0.972)FNSLQR	2	0.53395	2	1.167	1.21185	1.24514	0.833673	0.775073	0.754875
hsa05166 Human T-cell leukemia virus 1 infection	0.903378	9	0.72	Q9H6Z4	170	0.521	Down	0.00181766	S	Ran-binding protein 3 OS=Homo sapiens OX=9606 GN=RANBP3 PE=1 SV=1	RANBP3	1	0.000493286	68.41	S(1)VLRPAVLQAPQPK	4	-0.38416	1	1.29389	1.4073	1.1581	0.584378	0.692053	0.734568
hsa05166 Human T-cell leukemia virus 1 infection	0.903378	9	0.72	Q9H6Z4	221	0.821	Down	0.0161552	S	Ran-binding protein 3 OS=Homo sapiens OX=9606 GN=RANBP3 PE=1 SV=1	RANBP3	0.906382	3.36919e-07	122.01	S(0.094)PS(0.906)EAADEVCALEEKEPQK	3	-0.72909	2	1.01381	1.11144	1.14857	0.860174	0.873068	0.953704
hsa05166 Human T-cell leukemia virus 1 infection	0.903378	9	0.72	Q9H6Z4	244	0.752	Down	0.0193604	S	Ran-binding protein 3 OS=Homo sapiens OX=9606 GN=RANBP3 PE=1 SV=1	RANBP3	0.99967	3.07197e-11	144.72	NESSNAS(1)EEEACEK	2	0.30058	2	1.0927	1.26627	1.03429	0.777242	0.890728	0.883745
hsa05166 Human T-cell leukemia virus 1 infection	0.903378	9	0.72	P17612	198	0.632	Down	0.000102671	T	cAMP-dependent protein kinase catalytic subunit alpha OS=Homo sapiens OX=9606 GN=PRKACA PE=1 SV=2	PRKACA	0.985721	1.71589e-53	251.29	T(0.009)WT(0.986)LCGT(0.005)PEYLAPEIILSK	2	0.23372	4	1.2387	1.16367	1.20218	0.758099	0.729104	0.791845
hsa05166 Human T-cell leukemia virus 1 infection	0.903378	9	0.72	Q14674	1501	0.82	Down	0.049916	S	Separin OS=Homo sapiens OX=9606 GN=ESPL1 PE=1 SV=3	ESPL1	1	0.00261763	74.698	KMS(1)FEILR	3	-1.0667	2	1.09218	1.23086	0.990593	0.848598	0.935423	0.932485
hsa04919 Thyroid hormone signaling pathway	0.0885735	12	1.5	P17252	497	0.556	Down	0.0033406	T	Protein kinase C alpha type OS=Homo sapiens OX=9606 GN=PRKCA PE=1 SV=4	PRKCA	0.995374	1.9459e-81	290.44	T(0.995)FCGT(0.005)PDYIAPEIIAYQPYGK	4	-0.46556	5	1.39259	1.15755	1.19528	0.594895	0.754116	0.734164
hsa04919 Thyroid hormone signaling pathway	0.0885735	12	1.5	Q96ST3	277	0.781	Down	0.0047232	S	Paired amphipathic helix protein Sin3a OS=Homo sapiens OX=9606 GN=SIN3A PE=1 SV=2	SIN3A	0.997372	9.49261e-14	119.99	S(0.997)PPVQPHT(0.003)PVTISLGTAPSLQNNQPVEFNHAINYVNK	4	-0.8178	4	1.12941	1.07744	1.09715	0.844028	0.806545	0.928866
hsa04919 Thyroid hormone signaling pathway	0.0885735	12	1.5	P36507	306	0.695	Down	0.0148639	S	Dual specificity mitogen-activated protein kinase kinase 2 OS=Homo sapiens OX=9606 GN=MAP2K2 PE=1 SV=1	MAP2K2	0.999855	0.0114831	47.75	PRPPGRPVS(1)GHGMDSR	4	-1.4169	2	1.32853	1.15015	1.03137	0.736426	0.838773	0.863281
hsa04919 Thyroid hormone signaling pathway	0.0885735	12	1.5	P11166	490	0.804	Down	0.033061	S	Solute carrier family 2, facilitated glucose transporter member 1 OS=Homo sapiens OX=9606 GN=SLC2A1 PE=1 SV=2	SLC2A1	0.999997	0.0016421	65.231	TPEELFHPLGADS(1)QV	3	-0.85549	1	1.22854	1.18885	0.994845	0.890386	0.930823	0.922925
hsa04919 Thyroid hormone signaling pathway	0.0885735	12	1.5	P11166	473	0.718	Down	0.035703	S	Solute carrier family 2, facilitated glucose transporter member 1 OS=Homo sapiens OX=9606 GN=SLC2A1 PE=1 SV=2	SLC2A1	0.923363	6.12552e-17	171.94	QGGAS(0.923)QS(0.069)DKT(0.007)PEELFHPLGADSQV	4	-0.80699	2	1.23821	1.36291	0.989691	0.906559	0.787215	0.883399
hsa04919 Thyroid hormone signaling pathway	0.0885735	12	1.5	O60244	986	0.757	Down	0.046781	S	Mediator of RNA polymerase II transcription subunit 14 OS=Homo sapiens OX=9606 GN=MED14 PE=1 SV=2	MED14	0.990773	3.53105e-06	75.78	S(0.001)VNEDDNPPS(0.991)PIGGDMMDS(0.004)LIS(0.004)QLQPPPQQQPFPK	5	-1.0875	2	1.32315	1.15225	1.02552	0.886544	0.784992	0.978836
hsa04919 Thyroid hormone signaling pathway	0.0885735	12	1.5	O60343	666	0.585	Down	0.00050248	S	TBC1 domain family member 4 OS=Homo sapiens OX=9606 GN=TBC1D4 PE=1 SV=2	TBC1D4	1	0.00830765	53.557	AQGVRS(1)PLLR	2	0.20262	2	1.15699	1.29783	1.306	0.69281	0.779356	0.728529
hsa04919 Thyroid hormone signaling pathway	0.0885735	12	1.5	O60825	483	0.646	Down	0.0043966	S	6-phosphofructo-2-kinase/fructose-2,6-bisphosphatase 2 OS=Homo sapiens OX=9606 GN=PFKFB2 PE=1 SV=2	PFKFB2	0.999856	0.00333127	81.525	NYS(1)VGSR	2	0.076573	1	1.23134	1.09357	1.24412	0.675	0.80732	0.823974
hsa04919 Thyroid hormone signaling pathway	0.0885735	12	1.5	P42345	2448	0.83	Down	0.0090564	S	Serine/threonine-protein kinase mTOR OS=Homo sapiens OX=9606 GN=MTOR PE=1 SV=1	MTOR	0.805907	4.74526e-23	180.79	T(0.173)DS(0.806)YS(0.021)AGQSVEILDGVELGEPAHK	3	0.87519	2	1.11547	1.11778	1.04615	0.858614	0.962049	0.900875
hsa04919 Thyroid hormone signaling pathway	0.0885735	12	1.5	P17612	198	0.632	Down	0.000102671	T	cAMP-dependent protein kinase catalytic subunit alpha OS=Homo sapiens OX=9606 GN=PRKACA PE=1 SV=2	PRKACA	0.985721	1.71589e-53	251.29	T(0.009)WT(0.986)LCGT(0.005)PEYLAPEIILSK	2	0.23372	4	1.2387	1.16367	1.20218	0.758099	0.729104	0.791845
hsa04919 Thyroid hormone signaling pathway	0.0885735	12	1.5	Q6P2C8	132	0.698	Down	0.00159718	S	Mediator of RNA polymerase II transcription subunit 27 OS=Homo sapiens OX=9606 GN=MED27 PE=1 SV=1	MED27	0.99747	1.81912e-05	103.53	LQYHAGLAS(0.003)GLLNQQS(0.997)LKR	4	0.14216	1	1.19741	1.21001	1.06812	0.787512	0.849647	0.790308
hsa04919 Thyroid hormone signaling pathway	0.0885735	12	1.5	P05771	500	0.478	Down	0.00093695	T	Protein kinase C beta type OS=Homo sapiens OX=9606 GN=PRKCB PE=1 SV=4	PRKCB	0.995374	1.9459e-81	290.44	T(0.995)FCGT(0.005)PDYIAPEIIAYQPYGK	4	-0.46556	6	1.5464	1.18244	1.30737	0.608791	0.644283	0.674528
hsa04919 Thyroid hormone signaling pathway	0.0885735	12	1.5	P05771	504	0.692	Down	0.00020151	T	Protein kinase C beta type OS=Homo sapiens OX=9606 GN=PRKCB PE=1 SV=4	PRKCB	0.80982	4.41108e-11	148.75	T(0.19)FCGT(0.81)PDYIAPEIIAYQPYGK	3	0.69537	2	1.18248	1.20488	1.13603	0.825275	0.834846	0.776415
hsa04919 Thyroid hormone signaling pathway	0.0885735	12	1.5	P49841	25	0.731	Down	0.027898	S	Glycogen synthase kinase-3 beta OS=Homo sapiens OX=9606 GN=GSK3B PE=1 SV=2	GSK3B	0.874741	0.00134329	63.297	TTSFAESCKPVQQPS(0.125)AFGS(0.875)MK	4	-0.41305	1	1.28728	1.04314	1.14033	0.786368	0.968894	0.782038
hsa00983 Drug metabolism - other enzymes	0.860694	1	0.56	Q9BZX2	254	0.528	Down	0.00195769	S	Uridine-cytidine kinase 2 OS=Homo sapiens OX=9606 GN=UCK2 PE=1 SV=1	UCK2	0.995892	0.000318427	83.087	QAS(0.996)ES(0.004)SSRPH	3	0.78958	2	1.45567	1.41921	1.12381	0.726703	0.723384	0.662944
hsa05416 Viral myocarditis	0.610474	2	1.02	P78344	508	0.777	Down	0.0046551	T	Eukaryotic translation initiation factor 4 gamma 2 OS=Homo sapiens OX=9606 GN=EIF4G2 PE=1 SV=1	EIF4G2	0.848041	9.23805e-08	128.66	T(0.152)QT(0.848)PPLGQTPQLGLK	4	-0.93799	4	1.11729	1.11623	1.1202	0.83925	0.886922	0.879919
hsa05416 Viral myocarditis	0.610474	2	1.02	Q04637	1194	0.678	Down	0.0026572	S	Eukaryotic translation initiation factor 4 gamma 1 OS=Homo sapiens OX=9606 GN=EIF4G1 PE=1 SV=4	EIF4G1	1	0.000941176	82.529	EVEERS(1)R	3	0.040991	5	1.10605	1.27033	1.18731	0.746032	0.864783	0.805471
hsa05416 Viral myocarditis	0.610474	2	1.02	Q04637	1231	0.767	Down	0.000922	S	Eukaryotic translation initiation factor 4 gamma 1 OS=Homo sapiens OX=9606 GN=EIF4G1 PE=1 SV=4	EIF4G1	1	1.03769e-06	112.24	EAALPPVS(1)PLK	3	-0.40294	6	1.13974	1.1626	1.09567	0.832341	0.865792	0.906788
hsa04210 Apoptosis	0.817677	5	0.76	Q14643	1598	0.703	Down	0.036478	S	Inositol 1,4,5-trisphosphate receptor type 1 OS=Homo sapiens OX=9606 GN=ITPR1 PE=1 SV=3	ITPR1	1	0.000592839	104.7	RDS(1)VLAASR	2	-0.66094	2	1.01439	1.22483	1.2934	0.927152	0.863774	0.692376
hsa04210 Apoptosis	0.817677	5	0.76	Q03252	424	0.726	Down	0.00120347	S	Lamin-B2 OS=Homo sapiens OX=9606 GN=LMNB2 PE=1 SV=4	LMNB2	0.997825	6.45827e-16	160.64	ATSSSS(0.001)GS(0.998)LS(0.002)ATGR	2	0.17593	3	1.19417	1.16089	1.07411	0.85874	0.836756	0.794924
hsa04210 Apoptosis	0.817677	5	0.76	Q03252	409	0.46	Down	0.00173612	S	Lamin-B2 OS=Homo sapiens OX=9606 GN=LMNB2 PE=1 SV=4	LMNB2	0.957193	0.0103413	57.785	LSPS(0.005)PS(0.957)S(0.038)R	2	0.048902	1	1.57184	1.17341	1.26877	0.685976	0.582136	0.579695
hsa04210 Apoptosis	0.817677	5	0.76	P36507	306	0.695	Down	0.0148639	S	Dual specificity mitogen-activated protein kinase kinase 2 OS=Homo sapiens OX=9606 GN=MAP2K2 PE=1 SV=1	MAP2K2	0.999855	0.0114831	47.75	PRPPGRPVS(1)GHGMDSR	4	-1.4169	2	1.32853	1.15015	1.03137	0.736426	0.838773	0.863281
hsa04210 Apoptosis	0.817677	5	0.76	P09874	519	0.413	Down	0.00054204	S	Poly [ADP-ribose] polymerase 1 OS=Homo sapiens OX=9606 GN=PARP1 PE=1 SV=4	PARP1	1	0.0200538	41.996	EEGINKS(1)EKR	3	0.57411	1	1.50049	1.32553	1.35643	0.6083	0.48913	0.630879
hsa04210 Apoptosis	0.817677	5	0.76	P55210	37	0.601	Down	0.0025624	S	Caspase-7 OS=Homo sapiens OX=9606 GN=CASP7 PE=1 SV=1	CASP7	0.998199	9.95497e-06	109.15	SSFVPS(0.002)LFS(0.998)K	3	0.29139	1	1.2039	1.32334	1.2	0.82659	0.760255	0.652091
hsa04370 VEGF signaling pathway	0.607661	3	0.99	P17252	497	0.556	Down	0.0033406	T	Protein kinase C alpha type OS=Homo sapiens OX=9606 GN=PRKCA PE=1 SV=4	PRKCA	0.995374	1.9459e-81	290.44	T(0.995)FCGT(0.005)PDYIAPEIIAYQPYGK	4	-0.46556	5	1.39259	1.15755	1.19528	0.594895	0.754116	0.734164
hsa04370 VEGF signaling pathway	0.607661	3	0.99	P36507	306	0.695	Down	0.0148639	S	Dual specificity mitogen-activated protein kinase kinase 2 OS=Homo sapiens OX=9606 GN=MAP2K2 PE=1 SV=1	MAP2K2	0.999855	0.0114831	47.75	PRPPGRPVS(1)GHGMDSR	4	-1.4169	2	1.32853	1.15015	1.03137	0.736426	0.838773	0.863281
hsa04370 VEGF signaling pathway	0.607661	3	0.99	P05771	500	0.478	Down	0.00093695	T	Protein kinase C beta type OS=Homo sapiens OX=9606 GN=PRKCB PE=1 SV=4	PRKCB	0.995374	1.9459e-81	290.44	T(0.995)FCGT(0.005)PDYIAPEIIAYQPYGK	4	-0.46556	6	1.5464	1.18244	1.30737	0.608791	0.644283	0.674528
hsa04370 VEGF signaling pathway	0.607661	3	0.99	P05771	504	0.692	Down	0.00020151	T	Protein kinase C beta type OS=Homo sapiens OX=9606 GN=PRKCB PE=1 SV=4	PRKCB	0.80982	4.41108e-11	148.75	T(0.19)FCGT(0.81)PDYIAPEIIAYQPYGK	3	0.69537	2	1.18248	1.20488	1.13603	0.825275	0.834846	0.776415
hsa00562 Inositol phosphate metabolism	0.924878	2	0.51	Q13496	18	0.615	Down	0.023642	S	Myotubularin OS=Homo sapiens OX=9606 GN=MTM1 PE=1 SV=2	MTM1	0.999997	1.69037e-07	113.88	YNSHSLENES(1)IKR	3	0.083925	1	1.08476	1.0342	1.54154	0.722714	0.713383	0.814081
hsa00562 Inositol phosphate metabolism	0.924878	2	0.51	Q9Y2I7	307	0.691	Down	0.047963	S	1-phosphatidylinositol 3-phosphate 5-kinase OS=Homo sapiens OX=9606 GN=PIKFYVE PE=1 SV=3	PIKFYVE	0.871794	3.57111e-09	139.34	S(0.128)AS(0.872)IT(0.001)NLSLDR	3	0.28412	1	1.07724	1.3326	1.15109	0.641161	0.868173	0.950907
hsa00562 Inositol phosphate metabolism	0.924878	2	0.51	Q9Y2I7	105	0.66	Down	0.02364	S	1-phosphatidylinositol 3-phosphate 5-kinase OS=Homo sapiens OX=9606 GN=PIKFYVE PE=1 SV=3	PIKFYVE	0.820699	0.00259039	86.114	RS(0.179)S(0.821)ALDTR	3	0.16314	2	1.26159	1.36454	1.00398	0.690413	0.861582	0.843116
hsa05034 Alcoholism	0.900605	3	0.6	P62136	325	0.751	Down	0.0053385	S	Serine/threonine-protein phosphatase PP1-alpha catalytic subunit OS=Homo sapiens OX=9606 GN=PPP1CA PE=1 SV=1	PPP1CA	0.992523	0.0125529	46.068	PIT(0.007)PPRNS(0.993)AK	3	-0.90431	1	1.18208	1.07692	1.17159	0.789474	0.873474	0.91309
hsa05034 Alcoholism	0.900605	3	0.6	Q8WUI4	181	0.732	Down	0.0173759	S	Histone deacetylase 7 OS=Homo sapiens OX=9606 GN=HDAC7 PE=1 SV=2	HDAC7	0.984648	0.00190466	67.519	KES(0.985)APPS(0.015)LR	3	0.23354	2	1.06189	1.18847	1.14226	0.790534	0.742424	0.9499
hsa05034 Alcoholism	0.900605	3	0.6	P29353	139	0.543	Down	0.00030018	S	SHC-transforming protein 1 OS=Homo sapiens OX=9606 GN=SHC1 PE=1 SV=4	SHC1	0.999993	0.00167172	64.224	HGS(1)FVNKPTR	4	-0.306	1	1.32089	1.16622	1.29894	0.686165	0.644664	0.725825
hsa04071 Sphingolipid signaling pathway	0.381689	6	1.2	P17252	497	0.556	Down	0.0033406	T	Protein kinase C alpha type OS=Homo sapiens OX=9606 GN=PRKCA PE=1 SV=4	PRKCA	0.995374	1.9459e-81	290.44	T(0.995)FCGT(0.005)PDYIAPEIIAYQPYGK	4	-0.46556	5	1.39259	1.15755	1.19528	0.594895	0.754116	0.734164
hsa04071 Sphingolipid signaling pathway	0.381689	6	1.2	Q13464	1341	0.769	Down	0.00165903	S	Rho-associated protein kinase 1 OS=Homo sapiens OX=9606 GN=ROCK1 PE=1 SV=1	ROCK1	0.999984	0.0015088	73.273	STANQS(1)FRK	3	-0.19239	4	1.06273	1.13722	1.15035	0.840625	0.835176	0.901554
hsa04071 Sphingolipid signaling pathway	0.381689	6	1.2	P36507	306	0.695	Down	0.0148639	S	Dual specificity mitogen-activated protein kinase kinase 2 OS=Homo sapiens OX=9606 GN=MAP2K2 PE=1 SV=1	MAP2K2	0.999855	0.0114831	47.75	PRPPGRPVS(1)GHGMDSR	4	-1.4169	2	1.32853	1.15015	1.03137	0.736426	0.838773	0.863281
hsa04071 Sphingolipid signaling pathway	0.381689	6	1.2	Q14738	88	0.694	Down	0.00067513	S	Serine/threonine-protein phosphatase 2A 56 kDa regulatory subunit delta isoform OS=Homo sapiens OX=9606 GN=PPP2R5D PE=1 SV=1	PPP2R5D	0.996716	0.00441329	58.814	RQS(0.997)S(0.957)S(0.046)RFNLSK	3	-0.10795	3	1.23077	1.1945	1.10679	0.795367	0.80286	0.851889
hsa04071 Sphingolipid signaling pathway	0.381689	6	1.2	Q14738	90	0.602	Down	0.00072093	S	Serine/threonine-protein phosphatase 2A 56 kDa regulatory subunit delta isoform OS=Homo sapiens OX=9606 GN=PPP2R5D PE=1 SV=1	PPP2R5D	0.963246	0.00441329	58.814	RQS(0.518)S(0.518)S(0.963)RFNLSK	4	-0.099014	2	1.34312	1.20978	1.17764	0.702703	0.796731	0.747515
hsa04071 Sphingolipid signaling pathway	0.381689	6	1.2	Q14738	89	0.694	Down	0.00067513	S	Serine/threonine-protein phosphatase 2A 56 kDa regulatory subunit delta isoform OS=Homo sapiens OX=9606 GN=PPP2R5D PE=1 SV=1	PPP2R5D	0.956727	0.00441329	58.814	RQS(0.997)S(0.957)S(0.046)RFNLSK	3	-0.10795	3	1.23077	1.1945	1.10679	0.795367	0.80286	0.851889
hsa04071 Sphingolipid signaling pathway	0.381689	6	1.2	P05771	500	0.478	Down	0.00093695	T	Protein kinase C beta type OS=Homo sapiens OX=9606 GN=PRKCB PE=1 SV=4	PRKCB	0.995374	1.9459e-81	290.44	T(0.995)FCGT(0.005)PDYIAPEIIAYQPYGK	4	-0.46556	6	1.5464	1.18244	1.30737	0.608791	0.644283	0.674528
hsa04071 Sphingolipid signaling pathway	0.381689	6	1.2	P05771	504	0.692	Down	0.00020151	T	Protein kinase C beta type OS=Homo sapiens OX=9606 GN=PRKCB PE=1 SV=4	PRKCB	0.80982	4.41108e-11	148.75	T(0.19)FCGT(0.81)PDYIAPEIIAYQPYGK	3	0.69537	2	1.18248	1.20488	1.13603	0.825275	0.834846	0.776415
hsa04071 Sphingolipid signaling pathway	0.381689	6	1.2	Q13362	497	0.73	Down	0.0088423	S	Serine/threonine-protein phosphatase 2A 56 kDa regulatory subunit gamma isoform OS=Homo sapiens OX=9606 GN=PPP2R5C PE=1 SV=3	PPP2R5C	0.999998	0.000287118	75.018	RKS(1)ELPQDPHTK	4	0.15225	1	1.26891	1.0183	1.11621	0.848114	0.809783	0.826271
hsa04012 ErbB signaling pathway	0.0654285	10	1.65	O96013	207	0.804	Down	0.0049751	T	Serine/threonine-protein kinase PAK 4 OS=Homo sapiens OX=9606 GN=PAK4 PE=1 SV=1	PAK4	0.999979	0.000301264	80.632	LAAGRPFNT(1)YPR	3	-0.35196	1	1.12009	1.1469	1.06219	0.853591	0.874877	0.948156
hsa04012 ErbB signaling pathway	0.0654285	10	1.65	P17252	497	0.556	Down	0.0033406	T	Protein kinase C alpha type OS=Homo sapiens OX=9606 GN=PRKCA PE=1 SV=4	PRKCA	0.995374	1.9459e-81	290.44	T(0.995)FCGT(0.005)PDYIAPEIIAYQPYGK	4	-0.46556	5	1.39259	1.15755	1.19528	0.594895	0.754116	0.734164
hsa04012 ErbB signaling pathway	0.0654285	10	1.65	P36507	306	0.695	Down	0.0148639	S	Dual specificity mitogen-activated protein kinase kinase 2 OS=Homo sapiens OX=9606 GN=MAP2K2 PE=1 SV=1	MAP2K2	0.999855	0.0114831	47.75	PRPPGRPVS(1)GHGMDSR	4	-1.4169	2	1.32853	1.15015	1.03137	0.736426	0.838773	0.863281
hsa04012 ErbB signaling pathway	0.0654285	10	1.65	Q13177	64	0.447	Down	0.00043612	S	Serine/threonine-protein kinase PAK 2 OS=Homo sapiens OX=9606 GN=PAK2 PE=1 SV=3	PAK2	0.999442	5.257e-12	149.52	IISIFSGT(0.001)EKGS(0.999)K	3	1.0594	1	1.39749	1.33236	1.3204	0.518782	0.631407	0.659136
hsa04012 ErbB signaling pathway	0.0654285	10	1.65	Q13177	141	0.759	Down	0.026596	S	Serine/threonine-protein kinase PAK 2 OS=Homo sapiens OX=9606 GN=PAK2 PE=1 SV=3	PAK2	0.989003	9.27077e-23	176.53	YLS(0.989)FT(0.011)PPEKDGFPSGTPALNAK	3	0.010631	8	1.11509	1.14133	1.13433	0.787817	0.922574	0.862475
hsa04012 ErbB signaling pathway	0.0654285	10	1.65	Q13177	143	0.729	Down	0.00164278	T	Serine/threonine-protein kinase PAK 2 OS=Homo sapiens OX=9606 GN=PAK2 PE=1 SV=3	PAK2	0.998069	1.27539e-07	147.63	YLS(0.002)FT(0.998)PPEK	3	-0.45105	7	1.12476	1.154	1.16517	0.779695	0.897492	0.834971
hsa04012 ErbB signaling pathway	0.0654285	10	1.65	P29353	139	0.543	Down	0.00030018	S	SHC-transforming protein 1 OS=Homo sapiens OX=9606 GN=SHC1 PE=1 SV=4	SHC1	0.999993	0.00167172	64.224	HGS(1)FVNKPTR	4	-0.306	1	1.32089	1.16622	1.29894	0.686165	0.644664	0.725825
hsa04012 ErbB signaling pathway	0.0654285	10	1.65	P42345	2448	0.83	Down	0.0090564	S	Serine/threonine-protein kinase mTOR OS=Homo sapiens OX=9606 GN=MTOR PE=1 SV=1	MTOR	0.805907	4.74526e-23	180.79	T(0.173)DS(0.806)YS(0.021)AGQSVEILDGVELGEPAHK	3	0.87519	2	1.11547	1.11778	1.04615	0.858614	0.962049	0.900875
hsa04012 ErbB signaling pathway	0.0654285	10	1.65	Q13555	381	0.796	Down	0.0101985	S	Calcium/calmodulin-dependent protein kinase type II subunit gamma OS=Homo sapiens OX=9606 GN=CAMK2G PE=1 SV=4	CAMK2G	0.973501	6.26352e-13	153.36	GS(0.974)T(0.026)ESCNTTTEDEDLK	3	0.16272	1	1.07271	1.04295	1.16169	0.933747	0.821096	0.855057
hsa04012 ErbB signaling pathway	0.0654285	10	1.65	Q9UBS0	423	0.742	Down	0.0148977	S	Ribosomal protein S6 kinase beta-2 OS=Homo sapiens OX=9606 GN=RPS6KB2 PE=1 SV=2	RPS6KB2	1	0.00567252	66.568	APVS(1)PLK	2	0.30862	2	1.20786	1.12967	1.08995	0.771483	0.962801	0.810516
hsa04012 ErbB signaling pathway	0.0654285	10	1.65	P05771	500	0.478	Down	0.00093695	T	Protein kinase C beta type OS=Homo sapiens OX=9606 GN=PRKCB PE=1 SV=4	PRKCB	0.995374	1.9459e-81	290.44	T(0.995)FCGT(0.005)PDYIAPEIIAYQPYGK	4	-0.46556	6	1.5464	1.18244	1.30737	0.608791	0.644283	0.674528
hsa04012 ErbB signaling pathway	0.0654285	10	1.65	P05771	504	0.692	Down	0.00020151	T	Protein kinase C beta type OS=Homo sapiens OX=9606 GN=PRKCB PE=1 SV=4	PRKCB	0.80982	4.41108e-11	148.75	T(0.19)FCGT(0.81)PDYIAPEIIAYQPYGK	3	0.69537	2	1.18248	1.20488	1.13603	0.825275	0.834846	0.776415
hsa04012 ErbB signaling pathway	0.0654285	10	1.65	P49841	25	0.731	Down	0.027898	S	Glycogen synthase kinase-3 beta OS=Homo sapiens OX=9606 GN=GSK3B PE=1 SV=2	GSK3B	0.874741	0.00134329	63.297	TTSFAESCKPVQQPS(0.125)AFGS(0.875)MK	4	-0.41305	1	1.28728	1.04314	1.14033	0.786368	0.968894	0.782038
hsa04152 AMPK signaling pathway	0.179883	10	1.37	P61026	73	0.696	Down	0.0022597	T	Ras-related protein Rab-10 OS=Homo sapiens OX=9606 GN=RAB10 PE=1 SV=1	RAB10	0.990995	0.00587164	60.539	FHT(0.991)IT(0.007)T(0.002)SYYR	3	0.090304	1	1.24316	1.18462	1.0902	0.831207	0.855491	0.760346
hsa04152 AMPK signaling pathway	0.179883	10	1.37	Q14738	88	0.694	Down	0.00067513	S	Serine/threonine-protein phosphatase 2A 56 kDa regulatory subunit delta isoform OS=Homo sapiens OX=9606 GN=PPP2R5D PE=1 SV=1	PPP2R5D	0.996716	0.00441329	58.814	RQS(0.997)S(0.957)S(0.046)RFNLSK	3	-0.10795	3	1.23077	1.1945	1.10679	0.795367	0.80286	0.851889
hsa04152 AMPK signaling pathway	0.179883	10	1.37	Q14738	90	0.602	Down	0.00072093	S	Serine/threonine-protein phosphatase 2A 56 kDa regulatory subunit delta isoform OS=Homo sapiens OX=9606 GN=PPP2R5D PE=1 SV=1	PPP2R5D	0.963246	0.00441329	58.814	RQS(0.518)S(0.518)S(0.963)RFNLSK	4	-0.099014	2	1.34312	1.20978	1.17764	0.702703	0.796731	0.747515
hsa04152 AMPK signaling pathway	0.179883	10	1.37	Q14738	89	0.694	Down	0.00067513	S	Serine/threonine-protein phosphatase 2A 56 kDa regulatory subunit delta isoform OS=Homo sapiens OX=9606 GN=PPP2R5D PE=1 SV=1	PPP2R5D	0.956727	0.00441329	58.814	RQS(0.997)S(0.957)S(0.046)RFNLSK	3	-0.10795	3	1.23077	1.1945	1.10679	0.795367	0.80286	0.851889
hsa04152 AMPK signaling pathway	0.179883	10	1.37	P49327	2204	0.759	Down	0.0170619	T	Fatty acid synthase OS=Homo sapiens OX=9606 GN=FASN PE=1 SV=3	FASN	1	0.000143917	85.469	ADEASELACPT(1)PK	3	0.85741	1	1.02137	1.2082	1.21959	0.932751	0.814103	0.870518
hsa04152 AMPK signaling pathway	0.179883	10	1.37	P42345	2448	0.83	Down	0.0090564	S	Serine/threonine-protein kinase mTOR OS=Homo sapiens OX=9606 GN=MTOR PE=1 SV=1	MTOR	0.805907	4.74526e-23	180.79	T(0.173)DS(0.806)YS(0.021)AGQSVEILDGVELGEPAHK	3	0.87519	2	1.11547	1.11778	1.04615	0.858614	0.962049	0.900875
hsa04152 AMPK signaling pathway	0.179883	10	1.37	O60825	483	0.646	Down	0.0043966	S	6-phosphofructo-2-kinase/fructose-2,6-bisphosphatase 2 OS=Homo sapiens OX=9606 GN=PFKFB2 PE=1 SV=2	PFKFB2	0.999856	0.00333127	81.525	NYS(1)VGSR	2	0.076573	1	1.23134	1.09357	1.24412	0.675	0.80732	0.823974
hsa04152 AMPK signaling pathway	0.179883	10	1.37	P13807	698	0.615	Down	0.0061626	S	Glycogen [starch] synthase, muscle OS=Homo sapiens OX=9606 GN=GYS1 PE=1 SV=2	GYS1	0.997919	2.72633e-05	89.311	RAS(0.998)CT(0.002)SSTSGSK	3	-0.73717	2	1.33129	1.31149	1.10338	0.791704	0.844317	0.667946
hsa04152 AMPK signaling pathway	0.179883	10	1.37	Q16875	467	0.795	Down	0.02208	S	6-phosphofructo-2-kinase/fructose-2,6-bisphosphatase 3 OS=Homo sapiens OX=9606 GN=PFKFB3 PE=1 SV=1	PFKFB3	0.998407	0.000286184	78.354	RNS(0.895)VT(0.105)PLAS(0.998)PEPT(0.001)K	3	0.077466	1	1.12667	1.04035	1.19111	0.934511	0.803538	0.931363
hsa04152 AMPK signaling pathway	0.179883	10	1.37	Q16875	461	0.82	Down	0.036718	S	6-phosphofructo-2-kinase/fructose-2,6-bisphosphatase 3 OS=Homo sapiens OX=9606 GN=PFKFB3 PE=1 SV=1	PFKFB3	0.999325	1.52419e-11	149.36	RNS(0.999)VT(0.001)PLASPEPTK	3	0.040837	5	1.08857	1.01921	1.20889	0.972973	0.845438	0.899905
hsa04152 AMPK signaling pathway	0.179883	10	1.37	Q9UBS0	423	0.742	Down	0.0148977	S	Ribosomal protein S6 kinase beta-2 OS=Homo sapiens OX=9606 GN=RPS6KB2 PE=1 SV=2	RPS6KB2	1	0.00567252	66.568	APVS(1)PLK	2	0.30862	2	1.20786	1.12967	1.08995	0.771483	0.962801	0.810516
hsa04152 AMPK signaling pathway	0.179883	10	1.37	Q8N122	877	0.77	Down	0.0080602	S	Regulatory-associated protein of mTOR OS=Homo sapiens OX=9606 GN=RPTOR PE=1 SV=1	RPTOR	0.991807	1.1764e-12	133.79	GVHIHQAGGS(0.992)PPASST(0.006)S(0.001)SSSLTNDVAK	4	-0.38196	1	1.10798	1.13482	1.15495	0.784753	0.930091	0.902978
hsa04152 AMPK signaling pathway	0.179883	10	1.37	Q13362	497	0.73	Down	0.0088423	S	Serine/threonine-protein phosphatase 2A 56 kDa regulatory subunit gamma isoform OS=Homo sapiens OX=9606 GN=PPP2R5C PE=1 SV=3	PPP2R5C	0.999998	0.000287118	75.018	RKS(1)ELPQDPHTK	4	0.15225	1	1.26891	1.0183	1.11621	0.848114	0.809783	0.826271
hsa03030 DNA replication	0.896599	2	0.56	P25205	144	0.658	Down	0.030017	S	DNA replication licensing factor MCM3 OS=Homo sapiens OX=9606 GN=MCM3 PE=1 SV=3	MCM3	0.882151	0.00375494	61.233	S(0.882)VHY(0.118)CPATK	3	1.4944	1	1.22949	1.34385	1.0483	0.809243	0.789738	0.7842
hsa03030 DNA replication	0.896599	2	0.56	P35251	312	0.766	Down	0.022384	S	Replication factor C subunit 1 OS=Homo sapiens OX=9606 GN=RFC1 PE=1 SV=4	RFC1	0.966002	0.0048098	64.73	IGEVS(0.034)S(0.966)PK	2	0.29252	1	1.13767	1.00195	1.28284	0.856164	0.869565	0.894277
hsa00061 Fatty acid biosynthesis	0.324935	1	2.8	P49327	2204	0.759	Down	0.0170619	T	Fatty acid synthase OS=Homo sapiens OX=9606 GN=FASN PE=1 SV=3	FASN	1	0.000143917	85.469	ADEASELACPT(1)PK	3	0.85741	1	1.02137	1.2082	1.21959	0.932751	0.814103	0.870518
hsa05162 Measles	0.999232	1	0.16	P49841	25	0.731	Down	0.027898	S	Glycogen synthase kinase-3 beta OS=Homo sapiens OX=9606 GN=GSK3B PE=1 SV=2	GSK3B	0.874741	0.00134329	63.297	TTSFAESCKPVQQPS(0.125)AFGS(0.875)MK	4	-0.41305	1	1.28728	1.04314	1.14033	0.786368	0.968894	0.782038
hsa04662 B cell receptor signaling pathway	0.850886	3	0.67	P36507	306	0.695	Down	0.0148639	S	Dual specificity mitogen-activated protein kinase kinase 2 OS=Homo sapiens OX=9606 GN=MAP2K2 PE=1 SV=1	MAP2K2	0.999855	0.0114831	47.75	PRPPGRPVS(1)GHGMDSR	4	-1.4169	2	1.32853	1.15015	1.03137	0.736426	0.838773	0.863281
hsa04662 B cell receptor signaling pathway	0.850886	3	0.67	P05771	500	0.478	Down	0.00093695	T	Protein kinase C beta type OS=Homo sapiens OX=9606 GN=PRKCB PE=1 SV=4	PRKCB	0.995374	1.9459e-81	290.44	T(0.995)FCGT(0.005)PDYIAPEIIAYQPYGK	4	-0.46556	6	1.5464	1.18244	1.30737	0.608791	0.644283	0.674528
hsa04662 B cell receptor signaling pathway	0.850886	3	0.67	P05771	504	0.692	Down	0.00020151	T	Protein kinase C beta type OS=Homo sapiens OX=9606 GN=PRKCB PE=1 SV=4	PRKCB	0.80982	4.41108e-11	148.75	T(0.19)FCGT(0.81)PDYIAPEIIAYQPYGK	3	0.69537	2	1.18248	1.20488	1.13603	0.825275	0.834846	0.776415
hsa04662 B cell receptor signaling pathway	0.850886	3	0.67	P49841	25	0.731	Down	0.027898	S	Glycogen synthase kinase-3 beta OS=Homo sapiens OX=9606 GN=GSK3B PE=1 SV=2	GSK3B	0.874741	0.00134329	63.297	TTSFAESCKPVQQPS(0.125)AFGS(0.875)MK	4	-0.41305	1	1.28728	1.04314	1.14033	0.786368	0.968894	0.782038
hsa05223 Non-small cell lung cancer	0.764063	4	0.8	P17252	497	0.556	Down	0.0033406	T	Protein kinase C alpha type OS=Homo sapiens OX=9606 GN=PRKCA PE=1 SV=4	PRKCA	0.995374	1.9459e-81	290.44	T(0.995)FCGT(0.005)PDYIAPEIIAYQPYGK	4	-0.46556	5	1.39259	1.15755	1.19528	0.594895	0.754116	0.734164
hsa05223 Non-small cell lung cancer	0.764063	4	0.8	P36507	306	0.695	Down	0.0148639	S	Dual specificity mitogen-activated protein kinase kinase 2 OS=Homo sapiens OX=9606 GN=MAP2K2 PE=1 SV=1	MAP2K2	0.999855	0.0114831	47.75	PRPPGRPVS(1)GHGMDSR	4	-1.4169	2	1.32853	1.15015	1.03137	0.736426	0.838773	0.863281
hsa05223 Non-small cell lung cancer	0.764063	4	0.8	P06400	866	0.604	Down	0.00020446	S	Retinoblastoma-associated protein OS=Homo sapiens OX=9606 GN=RB1 PE=1 SV=2	RB1	0.999535	0.000334169	75.018	SAEGS(1)NPPKPLKK	3	0.67716	1	1.2809	1.23275	1.22143	0.750996	0.799603	0.704825
hsa05223 Non-small cell lung cancer	0.764063	4	0.8	P06400	606	0.82	Down	0.0024033	Y	Retinoblastoma-associated protein OS=Homo sapiens OX=9606 GN=RB1 PE=1 SV=2	RB1	0.758945	9.41717e-06	73.227	EGPTDHLESACPLNLPLQNNHT(0.441)AADMY(0.759)LS(0.787)PVRS(0.012)PK	3	0.89538	3	1.12666	1.06797	1.10714	0.860558	0.935516	0.910123
hsa05223 Non-small cell lung cancer	0.764063	4	0.8	P05771	500	0.478	Down	0.00093695	T	Protein kinase C beta type OS=Homo sapiens OX=9606 GN=PRKCB PE=1 SV=4	PRKCB	0.995374	1.9459e-81	290.44	T(0.995)FCGT(0.005)PDYIAPEIIAYQPYGK	4	-0.46556	6	1.5464	1.18244	1.30737	0.608791	0.644283	0.674528
hsa05223 Non-small cell lung cancer	0.764063	4	0.8	P05771	504	0.692	Down	0.00020151	T	Protein kinase C beta type OS=Homo sapiens OX=9606 GN=PRKCB PE=1 SV=4	PRKCB	0.80982	4.41108e-11	148.75	T(0.19)FCGT(0.81)PDYIAPEIIAYQPYGK	3	0.69537	2	1.18248	1.20488	1.13603	0.825275	0.834846	0.776415
hsa04928 Parathyroid hormone synthesis, secretion and action	0.577169	5	1	Q14643	1598	0.703	Down	0.036478	S	Inositol 1,4,5-trisphosphate receptor type 1 OS=Homo sapiens OX=9606 GN=ITPR1 PE=1 SV=3	ITPR1	1	0.000592839	104.7	RDS(1)VLAASR	2	-0.66094	2	1.01439	1.22483	1.2934	0.927152	0.863774	0.692376
hsa04928 Parathyroid hormone synthesis, secretion and action	0.577169	5	1	P17252	497	0.556	Down	0.0033406	T	Protein kinase C alpha type OS=Homo sapiens OX=9606 GN=PRKCA PE=1 SV=4	PRKCA	0.995374	1.9459e-81	290.44	T(0.995)FCGT(0.005)PDYIAPEIIAYQPYGK	4	-0.46556	5	1.39259	1.15755	1.19528	0.594895	0.754116	0.734164
hsa04928 Parathyroid hormone synthesis, secretion and action	0.577169	5	1	Q12802	1565	0.757	Down	0.0109801	S	A-kinase anchor protein 13 OS=Homo sapiens OX=9606 GN=AKAP13 PE=1 SV=2	AKAP13	1	0.017813	41.704	RHS(1)WGPGK	4	-0.40944	2	1.12321	1.07654	1.17441	0.793069	0.810256	0.951404
hsa04928 Parathyroid hormone synthesis, secretion and action	0.577169	5	1	P17612	198	0.632	Down	0.000102671	T	cAMP-dependent protein kinase catalytic subunit alpha OS=Homo sapiens OX=9606 GN=PRKACA PE=1 SV=2	PRKACA	0.985721	1.71589e-53	251.29	T(0.009)WT(0.986)LCGT(0.005)PEYLAPEIILSK	2	0.23372	4	1.2387	1.16367	1.20218	0.758099	0.729104	0.791845
hsa04928 Parathyroid hormone synthesis, secretion and action	0.577169	5	1	P05771	500	0.478	Down	0.00093695	T	Protein kinase C beta type OS=Homo sapiens OX=9606 GN=PRKCB PE=1 SV=4	PRKCB	0.995374	1.9459e-81	290.44	T(0.995)FCGT(0.005)PDYIAPEIIAYQPYGK	4	-0.46556	6	1.5464	1.18244	1.30737	0.608791	0.644283	0.674528
hsa04928 Parathyroid hormone synthesis, secretion and action	0.577169	5	1	P05771	504	0.692	Down	0.00020151	T	Protein kinase C beta type OS=Homo sapiens OX=9606 GN=PRKCB PE=1 SV=4	PRKCB	0.80982	4.41108e-11	148.75	T(0.19)FCGT(0.81)PDYIAPEIIAYQPYGK	3	0.69537	2	1.18248	1.20488	1.13603	0.825275	0.834846	0.776415
hsa04976 Bile secretion	0.431711	2	1.4	P11166	490	0.804	Down	0.033061	S	Solute carrier family 2, facilitated glucose transporter member 1 OS=Homo sapiens OX=9606 GN=SLC2A1 PE=1 SV=2	SLC2A1	0.999997	0.0016421	65.231	TPEELFHPLGADS(1)QV	3	-0.85549	1	1.22854	1.18885	0.994845	0.890386	0.930823	0.922925
hsa04976 Bile secretion	0.431711	2	1.4	P11166	473	0.718	Down	0.035703	S	Solute carrier family 2, facilitated glucose transporter member 1 OS=Homo sapiens OX=9606 GN=SLC2A1 PE=1 SV=2	SLC2A1	0.923363	6.12552e-17	171.94	QGGAS(0.923)QS(0.069)DKT(0.007)PEELFHPLGADSQV	4	-0.80699	2	1.23821	1.36291	0.989691	0.906559	0.787215	0.883399
hsa04976 Bile secretion	0.431711	2	1.4	P17612	198	0.632	Down	0.000102671	T	cAMP-dependent protein kinase catalytic subunit alpha OS=Homo sapiens OX=9606 GN=PRKACA PE=1 SV=2	PRKACA	0.985721	1.71589e-53	251.29	T(0.009)WT(0.986)LCGT(0.005)PEYLAPEIILSK	2	0.23372	4	1.2387	1.16367	1.20218	0.758099	0.729104	0.791845
hsa04973 Carbohydrate digestion and absorption	0.445482	1	1.87	P05771	500	0.478	Down	0.00093695	T	Protein kinase C beta type OS=Homo sapiens OX=9606 GN=PRKCB PE=1 SV=4	PRKCB	0.995374	1.9459e-81	290.44	T(0.995)FCGT(0.005)PDYIAPEIIAYQPYGK	4	-0.46556	6	1.5464	1.18244	1.30737	0.608791	0.644283	0.674528
hsa04973 Carbohydrate digestion and absorption	0.445482	1	1.87	P05771	504	0.692	Down	0.00020151	T	Protein kinase C beta type OS=Homo sapiens OX=9606 GN=PRKCB PE=1 SV=4	PRKCB	0.80982	4.41108e-11	148.75	T(0.19)FCGT(0.81)PDYIAPEIIAYQPYGK	3	0.69537	2	1.18248	1.20488	1.13603	0.825275	0.834846	0.776415
hsa04966 Collecting duct acid secretion	0.544575	1	1.4	Q9Y666	980	0.658	Down	0.0140985	T	Solute carrier family 12 member 7 OS=Homo sapiens OX=9606 GN=SLC12A7 PE=1 SV=3	SLC12A7	0.783276	0.0194458	61.593	VQMT(0.783)WT(0.217)R	2	-0.21275	2	1.39513	1.06094	1.16633	0.815951	0.705341	0.860746
hsa04659 Th17 cell differentiation	0.737364	4	0.83	Q01196	21	0.817	Down	0.020516	S	Runt-related transcription factor 1 OS=Homo sapiens OX=9606 GN=RUNX1 PE=1 SV=3	RUNX1	0.999927	1.7118e-13	155.09	FTPPSTALS(1)PGK	3	-0.3697	14	1.16109	1.16073	1.01125	0.879639	0.884615	0.959711
hsa04659 Th17 cell differentiation	0.737364	4	0.83	P42345	2448	0.83	Down	0.0090564	S	Serine/threonine-protein kinase mTOR OS=Homo sapiens OX=9606 GN=MTOR PE=1 SV=1	MTOR	0.805907	4.74526e-23	180.79	T(0.173)DS(0.806)YS(0.021)AGQSVEILDGVELGEPAHK	3	0.87519	2	1.11547	1.11778	1.04615	0.858614	0.962049	0.900875
hsa04659 Th17 cell differentiation	0.737364	4	0.83	P06239	192	0.769	Down	0.021855	Y	Tyrosine-protein kinase Lck OS=Homo sapiens OX=9606 GN=LCK PE=1 SV=6	LCK	0.999949	1.76854e-25	204.94	NLDNGGFY(1)ISPR	3	-0.12288	5	1.03582	1.18558	1.10636	0.844091	0.85497	0.858729
hsa04659 Th17 cell differentiation	0.737364	4	0.83	Q04759	538	0.682	Down	0.0054007	T	Protein kinase C theta type OS=Homo sapiens OX=9606 GN=PRKCQ PE=1 SV=3	PRKCQ	0.758097	1.56803e-16	173.32	T(0.236)NT(0.758)FCGT(0.006)PDYIAPEILLGQK	4	-0.56803	2	1.29281	1.13714	1.15307	0.729626	0.887195	0.826693
hsa04659 Th17 cell differentiation	0.737364	4	0.83	Q04759	542	0.664	Down	0.0046812	T	Protein kinase C theta type OS=Homo sapiens OX=9606 GN=PRKCQ PE=1 SV=3	PRKCQ	0.800787	1.43662e-16	174.28	T(0.022)NT(0.178)FCGT(0.801)PDYIAPEILLGQK	2	-1.3442	1	1.3129	1.17718	1.12487	0.753595	0.756098	0.891434
hsa05222 Small cell lung cancer	0.971547	1	0.31	P06400	866	0.604	Down	0.00020446	S	Retinoblastoma-associated protein OS=Homo sapiens OX=9606 GN=RB1 PE=1 SV=2	RB1	0.999535	0.000334169	75.018	SAEGS(1)NPPKPLKK	3	0.67716	1	1.2809	1.23275	1.22143	0.750996	0.799603	0.704825
hsa05222 Small cell lung cancer	0.971547	1	0.31	P06400	606	0.82	Down	0.0024033	Y	Retinoblastoma-associated protein OS=Homo sapiens OX=9606 GN=RB1 PE=1 SV=2	RB1	0.758945	9.41717e-06	73.227	EGPTDHLESACPLNLPLQNNHT(0.441)AADMY(0.759)LS(0.787)PVRS(0.012)PK	3	0.89538	3	1.12666	1.06797	1.10714	0.860558	0.935516	0.910123
hsa03013 RNA transport	0.0756796	19	1.38	Q8TEM1	1230	0.503	Down	4.286e-05	S	Nuclear pore membrane glycoprotein 210 OS=Homo sapiens OX=9606 GN=NUP210 PE=1 SV=3	NUP210	1	0.00555145	63.216	HHEAS(1)IR	3	0.038986	1	1.42457	1.28676	1.32647	0.665354	0.704102	0.660664
hsa03013 RNA transport	0.0756796	19	1.38	P20042	105	0.787	Down	0.00075732	S	Eukaryotic translation initiation factor 2 subunit 2 OS=Homo sapiens OX=9606 GN=EIF2S2 PE=1 SV=2	EIF2S2	1	1.76471e-16	166.51	IES(1)DVQEPT(1)EPEDDLDIMLGNK	3	0.65931	9	1.07574	1.15304	1.13382	0.862725	0.907988	0.875962
hsa03013 RNA transport	0.0756796	19	1.38	Q9UKX7	270	0.788	Down	0.0062569	S	Nuclear pore complex protein Nup50 OS=Homo sapiens OX=9606 GN=NUP50 PE=1 SV=2	NUP50	0.995947	1.99358e-05	104.52	KTDPSSLGATS(0.004)AS(0.996)FNFGK	4	-0.76055	1	1.13752	1.03835	1.12166	0.825998	0.844488	0.927403
hsa03013 RNA transport	0.0756796	19	1.38	P78346	251	0.696	Down	0.0103249	S	Ribonuclease P protein subunit p30 OS=Homo sapiens OX=9606 GN=RPP30 PE=1 SV=1	RPP30	1	4.78194e-07	115.84	KPRPS(1)EGDEDCLPASK	3	0.027937	2	1.24561	1.09329	1.23206	0.721831	0.857002	0.905975
hsa03013 RNA transport	0.0756796	19	1.38	P49792	21	0.722	Down	0.022417	S	E3 SUMO-protein ligase RanBP2 OS=Homo sapiens OX=9606 GN=RANBP2 PE=1 SV=2	RANBP2	0.857286	0.000211513	80.411	YIASVQGS(0.039)T(0.104)PS(0.857)PR	3	0.46971	1	0.968269	1.20611	1.26353	0.783058	0.877878	0.821535
hsa03013 RNA transport	0.0756796	19	1.38	Q8NI27	1364	0.828	Down	0.0037552	S	THO complex subunit 2 OS=Homo sapiens OX=9606 GN=THOC2 PE=1 SV=2	THOC2	1	0.00996148	65.842	EKEPS(1)RER	4	-0.27856	2	1.09681	1.07249	1.1144	0.855236	0.925852	0.939275
hsa03013 RNA transport	0.0756796	19	1.38	P78344	508	0.777	Down	0.0046551	T	Eukaryotic translation initiation factor 4 gamma 2 OS=Homo sapiens OX=9606 GN=EIF4G2 PE=1 SV=1	EIF4G2	0.848041	9.23805e-08	128.66	T(0.152)QT(0.848)PPLGQTPQLGLK	4	-0.93799	4	1.11729	1.11623	1.1202	0.83925	0.886922	0.879919
hsa03013 RNA transport	0.0756796	19	1.38	Q8WUM0	15	0.34	Down	0.00073854	S	Nuclear pore complex protein Nup133 OS=Homo sapiens OX=9606 GN=NUP133 PE=1 SV=2	NUP133	0.79349	0.0375982	41.399	T(0.001)PGT(0.206)GS(0.793)RR	3	0.40555	1	1.36174	1.42334	1.57884	0.39602	0.567901	0.518775
hsa03013 RNA transport	0.0756796	19	1.38	Q09161	22	0.651	Down	4.3372e-07	S	Nuclear cap-binding protein subunit 1 OS=Homo sapiens OX=9606 GN=NCBP1 PE=1 SV=1	NCBP1	0.976199	1.54841e-76	288.64	T(0.024)S(0.976)DANETEDHLESLICK	3	1.0936	4	1.21824	1.20464	1.19598	0.794479	0.786065	0.777027
hsa03013 RNA transport	0.0756796	19	1.38	Q09161	7	0.775	Down	0.00115592	S	Nuclear cap-binding protein subunit 1 OS=Homo sapiens OX=9606 GN=NCBP1 PE=1 SV=1	NCBP1	1	3.41289e-11	135.08	RRHS(1)DENDGGQPHK	3	-0.75277	7	1.17213	1.10685	1.09648	0.833333	0.894014	0.888996
hsa03013 RNA transport	0.0756796	19	1.38	Q09161	674	0.763	Down	0.00089942	S	Nuclear cap-binding protein subunit 1 OS=Homo sapiens OX=9606 GN=NCBP1 PE=1 SV=1	NCBP1	1	4.73535e-05	115.34	RRS(1)DDDDR	3	-0.53646	21	1.09529	1.14919	1.15477	0.893661	0.877331	0.821429
hsa03013 RNA transport	0.0756796	19	1.38	Q9UKV3	240	0.712	Down	0.00141736	S	Apoptotic chromatin condensation inducer in the nucleus OS=Homo sapiens OX=9606 GN=ACIN1 PE=1 SV=2	ACIN1	1	1.02368e-05	96.068	AAKLS(1)EGS(1)QPAEEEEDQETPSR	3	-1.5256	1	1.18047	1.15891	1.12683	0.756345	0.858193	0.853524
hsa03013 RNA transport	0.0756796	19	1.38	Q9UKV3	243	0.712	Down	0.00141736	S	Apoptotic chromatin condensation inducer in the nucleus OS=Homo sapiens OX=9606 GN=ACIN1 PE=1 SV=2	ACIN1	1	1.02368e-05	96.068	AAKLS(1)EGS(1)QPAEEEEDQETPSR	3	-1.5256	1	1.18047	1.15891	1.12683	0.756345	0.858193	0.853524
hsa03013 RNA transport	0.0756796	19	1.38	Q9UKV3	838	0.805	Down	0.0185785	S	Apoptotic chromatin condensation inducer in the nucleus OS=Homo sapiens OX=9606 GN=ACIN1 PE=1 SV=2	ACIN1	0.989305	8.04972e-16	166.34	GVPAGNS(0.989)DT(0.011)EGGQPGR	3	-0.17055	7	1.02791	1.13469	1.14244	0.808122	0.934874	0.9163
hsa03013 RNA transport	0.0756796	19	1.38	Q96HA1	93	0.557	Down	0.000177403	S	Nuclear envelope pore membrane protein POM 121 OS=Homo sapiens OX=9606 GN=POM121 PE=1 SV=2	POM121	0.883625	0.0109519	57.785	RPLS(0.884)S(0.116)FVR	3	-0.48976	1	1.23902	1.3468	1.21176	0.66855	0.705314	0.739645
hsa03013 RNA transport	0.0756796	19	1.38	O60841	164	0.823	Down	0.00117955	S	Eukaryotic translation initiation factor 5B OS=Homo sapiens OX=9606 GN=EIF5B PE=1 SV=4	EIF5B	1	1.21515e-15	159.95	WDGS(1)EEDEDNSK	3	0.15785	6	1.12922	1.09335	1.07776	0.875386	0.904811	0.935649
hsa03013 RNA transport	0.0756796	19	1.38	O60841	107	0.593	Down	0.00022124	S	Eukaryotic translation initiation factor 5B OS=Homo sapiens OX=9606 GN=EIF5B PE=1 SV=4	EIF5B	1	1.06435e-15	161.49	KQS(1)FDDNDS(1)EELEDKDSK	4	-0.22193	3	1.30915	1.18272	1.25	0.747683	0.700102	0.772217
hsa03013 RNA transport	0.0756796	19	1.38	O95149	75	0.662	Down	0.0059425	S	Snurportin-1 OS=Homo sapiens OX=9606 GN=SNUPN PE=1 SV=1	SNUPN	0.937643	5.59112e-10	123.86	LAEDDWT(0.062)GMES(0.938)EEENKKDDEEMDIDTVK	4	-0.94683	1	1.2943	1.11495	1.22511	0.706041	0.824561	0.876228
hsa03013 RNA transport	0.0756796	19	1.38	Q9BQ52	199	0.717	Down	0.00060194	S	Zinc phosphodiesterase ELAC protein 2 OS=Homo sapiens OX=9606 GN=ELAC2 PE=1 SV=2	ELAC2	0.998908	0.00087245	81.01	HQPWQS(0.999)PERPLS(0.001)R	3	0.16825	2	1.22331	1.15199	1.15848	0.805351	0.887352	0.839357
hsa03013 RNA transport	0.0756796	19	1.38	P46060	24	0.513	Down	0.00103854	S	Ran GTPase-activating protein 1 OS=Homo sapiens OX=9606 GN=RANGAP1 PE=1 SV=1	RANGAP1	1	4.96997e-05	87.647	TQVAGGQLS(1)FK	3	0.6661	1	1.34331	1.28101	1.25759	0.580042	0.755446	0.657868
hsa03013 RNA transport	0.0756796	19	1.38	P57740	86	0.815	Down	0.0108566	S	Nuclear pore complex protein Nup107 OS=Homo sapiens OX=9606 GN=NUP107 PE=1 SV=1	NUP107	0.999702	8.89751e-16	153.61	QPDISCILGTGGKS(1)PR	3	0.26175	6	1.11263	1.16536	1.05015	0.867224	0.879227	0.966634
hsa03013 RNA transport	0.0756796	19	1.38	P23588	424	0.795	Down	0.0109813	S	Eukaryotic translation initiation factor 4B OS=Homo sapiens OX=9606 GN=EIF4B PE=1 SV=2	EIF4B	0.779465	2.34907e-32	216.65	T(0.002)GS(0.056)ES(0.779)S(0.114)QT(0.049)GTSTTSSR	2	-0.29929	2	1.10239	1.09004	1.0939	0.912245	0.85641	0.843017
hsa03013 RNA transport	0.0756796	19	1.38	P23588	409	0.616	Down	0.0033759	S	Eukaryotic translation initiation factor 4B OS=Homo sapiens OX=9606 GN=EIF4B PE=1 SV=2	EIF4B	0.984595	0.00151357	70.783	HPS(0.999)WRS(0.985)EET(0.016)QER	2	0.055379	2	1.3177	1.12931	1.17812	0.816327	0.757949	0.658512
hsa03013 RNA transport	0.0756796	19	1.38	P23588	230	0.709	Down	0.0047441	S	Eukaryotic translation initiation factor 4B OS=Homo sapiens OX=9606 GN=EIF4B PE=1 SV=2	EIF4B	0.999699	0.00822969	51.612	DRYDS(1)DRYR	3	0.49511	1	1.12823	1.17625	1.12585	0.719388	0.876923	0.834862
hsa03013 RNA transport	0.0756796	19	1.38	P23588	489	0.394	Down	0.000104272	S	Eukaryotic translation initiation factor 4B OS=Homo sapiens OX=9606 GN=EIF4B PE=1 SV=2	EIF4B	0.912617	0.00804152	79.86	RS(0.087)S(0.913)NPPAR	2	0.46492	1	1.42679	1.32375	1.37948	0.481633	0.575385	0.568807
hsa03013 RNA transport	0.0756796	19	1.38	P23588	285	0.564	Down	4.1431e-05	Y	Eukaryotic translation initiation factor 4B OS=Homo sapiens OX=9606 GN=EIF4B PE=1 SV=2	EIF4B	0.875042	0.00677755	65.263	AFGS(0.125)GY(0.875)R	2	0.22603	2	1.30526	1.2251	1.19264	0.695918	0.687179	0.717635
hsa03013 RNA transport	0.0756796	19	1.38	P23588	406	0.784	Down	0.00051961	S	Eukaryotic translation initiation factor 4B OS=Homo sapiens OX=9606 GN=EIF4B PE=1 SV=2	EIF4B	1	0.00151357	77.662	ERHPS(1)WR	2	0.80698	5	1.06986	1.09195	1.14134	0.87551	0.838974	0.875637
hsa03013 RNA transport	0.0756796	19	1.38	Q04637	1194	0.678	Down	0.0026572	S	Eukaryotic translation initiation factor 4 gamma 1 OS=Homo sapiens OX=9606 GN=EIF4G1 PE=1 SV=4	EIF4G1	1	0.000941176	82.529	EVEERS(1)R	3	0.040991	5	1.10605	1.27033	1.18731	0.746032	0.864783	0.805471
hsa03013 RNA transport	0.0756796	19	1.38	Q04637	1231	0.767	Down	0.000922	S	Eukaryotic translation initiation factor 4 gamma 1 OS=Homo sapiens OX=9606 GN=EIF4G1 PE=1 SV=4	EIF4G1	1	1.03769e-06	112.24	EAALPPVS(1)PLK	3	-0.40294	6	1.13974	1.1626	1.09567	0.832341	0.865792	0.906788
hsa03013 RNA transport	0.0756796	19	1.38	P49790	217	0.575	Down	0.00121504	S	Nuclear pore complex protein Nup153 OS=Homo sapiens OX=9606 GN=NUP153 PE=1 SV=2	NUP153	0.881203	7.99339e-07	109.48	S(0.025)HS(0.881)LS(0.094)QHTATSSK	3	-0.24157	1	1.35248	1.25424	1.11204	0.730361	0.662325	0.743793
hsa03013 RNA transport	0.0756796	19	1.38	P49790	614	0.756	Down	0.0026424	S	Nuclear pore complex protein Nup153 OS=Homo sapiens OX=9606 GN=NUP153 PE=1 SV=2	NUP153	0.990878	0.000554816	68.42	EGSVLDILKS(0.991)PGFAS(0.009)PK	3	0.00086765	1	1.13437	1.16251	1.06069	0.795117	0.883768	0.860973
hsa04066 HIF-1 signaling pathway	0.0223559	11	1.87	P17252	497	0.556	Down	0.0033406	T	Protein kinase C alpha type OS=Homo sapiens OX=9606 GN=PRKCA PE=1 SV=4	PRKCA	0.995374	1.9459e-81	290.44	T(0.995)FCGT(0.005)PDYIAPEIIAYQPYGK	4	-0.46556	5	1.39259	1.15755	1.19528	0.594895	0.754116	0.734164
hsa04066 HIF-1 signaling pathway	0.0223559	11	1.87	P36507	306	0.695	Down	0.0148639	S	Dual specificity mitogen-activated protein kinase kinase 2 OS=Homo sapiens OX=9606 GN=MAP2K2 PE=1 SV=1	MAP2K2	0.999855	0.0114831	47.75	PRPPGRPVS(1)GHGMDSR	4	-1.4169	2	1.32853	1.15015	1.03137	0.736426	0.838773	0.863281
hsa04066 HIF-1 signaling pathway	0.0223559	11	1.87	P11166	490	0.804	Down	0.033061	S	Solute carrier family 2, facilitated glucose transporter member 1 OS=Homo sapiens OX=9606 GN=SLC2A1 PE=1 SV=2	SLC2A1	0.999997	0.0016421	65.231	TPEELFHPLGADS(1)QV	3	-0.85549	1	1.22854	1.18885	0.994845	0.890386	0.930823	0.922925
hsa04066 HIF-1 signaling pathway	0.0223559	11	1.87	P11166	473	0.718	Down	0.035703	S	Solute carrier family 2, facilitated glucose transporter member 1 OS=Homo sapiens OX=9606 GN=SLC2A1 PE=1 SV=2	SLC2A1	0.923363	6.12552e-17	171.94	QGGAS(0.923)QS(0.069)DKT(0.007)PEELFHPLGADSQV	4	-0.80699	2	1.23821	1.36291	0.989691	0.906559	0.787215	0.883399
hsa04066 HIF-1 signaling pathway	0.0223559	11	1.87	P62753	240	0.42	Down	2.2224e-07	S	40S ribosomal protein S6 OS=Homo sapiens OX=9606 GN=RPS6 PE=1 SV=1	RPS6	0.976428	0.0136586	45.614	LS(0.5)S(0.501)LRAS(0.976)T(0.017)S(0.006)K	3	-0.019157	2	1.38212	1.44293	1.41209	0.586408	0.600971	0.593269
hsa04066 HIF-1 signaling pathway	0.0223559	11	1.87	Q13555	381	0.796	Down	0.0101985	S	Calcium/calmodulin-dependent protein kinase type II subunit gamma OS=Homo sapiens OX=9606 GN=CAMK2G PE=1 SV=4	CAMK2G	0.973501	6.26352e-13	153.36	GS(0.974)T(0.026)ESCNTTTEDEDLK	3	0.16272	1	1.07271	1.04295	1.16169	0.933747	0.821096	0.855057
hsa04066 HIF-1 signaling pathway	0.0223559	11	1.87	P42345	2448	0.83	Down	0.0090564	S	Serine/threonine-protein kinase mTOR OS=Homo sapiens OX=9606 GN=MTOR PE=1 SV=1	MTOR	0.805907	4.74526e-23	180.79	T(0.173)DS(0.806)YS(0.021)AGQSVEILDGVELGEPAHK	3	0.87519	2	1.11547	1.11778	1.04615	0.858614	0.962049	0.900875
hsa04066 HIF-1 signaling pathway	0.0223559	11	1.87	Q9GZT9	125	0.804	Down	0.026804	S	Egl nine homolog 1 OS=Homo sapiens OX=9606 GN=EGLN1 PE=1 SV=1	EGLN1	1	0.000135061	86.539	AKPPADPAAAAS(1)PCR	3	-2.3497	1	1.19913	1.15155	1.01562	0.921933	0.950192	0.83475
hsa04066 HIF-1 signaling pathway	0.0223559	11	1.87	P06733	44	0.792	Down	0.0124793	Y	Alpha-enolase OS=Homo sapiens OX=9606 GN=ENO1 PE=1 SV=2	ENO1	1	4.36992e-33	218.36	AAVPSGASTGIY(1)EALELR	3	1.22	2	1.10567	1.1179	1.17377	0.959372	0.921267	0.808877
hsa04066 HIF-1 signaling pathway	0.0223559	11	1.87	Q16875	467	0.795	Down	0.02208	S	6-phosphofructo-2-kinase/fructose-2,6-bisphosphatase 3 OS=Homo sapiens OX=9606 GN=PFKFB3 PE=1 SV=1	PFKFB3	0.998407	0.000286184	78.354	RNS(0.895)VT(0.105)PLAS(0.998)PEPT(0.001)K	3	0.077466	1	1.12667	1.04035	1.19111	0.934511	0.803538	0.931363
hsa04066 HIF-1 signaling pathway	0.0223559	11	1.87	Q16875	461	0.82	Down	0.036718	S	6-phosphofructo-2-kinase/fructose-2,6-bisphosphatase 3 OS=Homo sapiens OX=9606 GN=PFKFB3 PE=1 SV=1	PFKFB3	0.999325	1.52419e-11	149.36	RNS(0.999)VT(0.001)PLASPEPTK	3	0.040837	5	1.08857	1.01921	1.20889	0.972973	0.845438	0.899905
hsa04066 HIF-1 signaling pathway	0.0223559	11	1.87	Q9UBS0	423	0.742	Down	0.0148977	S	Ribosomal protein S6 kinase beta-2 OS=Homo sapiens OX=9606 GN=RPS6KB2 PE=1 SV=2	RPS6KB2	1	0.00567252	66.568	APVS(1)PLK	2	0.30862	2	1.20786	1.12967	1.08995	0.771483	0.962801	0.810516
hsa04066 HIF-1 signaling pathway	0.0223559	11	1.87	P05771	500	0.478	Down	0.00093695	T	Protein kinase C beta type OS=Homo sapiens OX=9606 GN=PRKCB PE=1 SV=4	PRKCB	0.995374	1.9459e-81	290.44	T(0.995)FCGT(0.005)PDYIAPEIIAYQPYGK	4	-0.46556	6	1.5464	1.18244	1.30737	0.608791	0.644283	0.674528
hsa04066 HIF-1 signaling pathway	0.0223559	11	1.87	P05771	504	0.692	Down	0.00020151	T	Protein kinase C beta type OS=Homo sapiens OX=9606 GN=PRKCB PE=1 SV=4	PRKCB	0.80982	4.41108e-11	148.75	T(0.19)FCGT(0.81)PDYIAPEIIAYQPYGK	3	0.69537	2	1.18248	1.20488	1.13603	0.825275	0.834846	0.776415
hsa04145 Phagosome	0.381689	6	1.2	Q14204	4368	0.815	Down	0.00093754	S	Cytoplasmic dynein 1 heavy chain 1 OS=Homo sapiens OX=9606 GN=DYNC1H1 PE=1 SV=5	DYNC1H1	0.932944	1.04582e-07	115.56	T(0.02)DS(0.933)T(0.036)S(0.011)DGRPAWMR	3	-0.28378	5	1.09465	1.0751	1.14286	0.920802	0.875365	0.902941
hsa04145 Phagosome	0.381689	6	1.2	Q9Y2I7	307	0.691	Down	0.047963	S	1-phosphatidylinositol 3-phosphate 5-kinase OS=Homo sapiens OX=9606 GN=PIKFYVE PE=1 SV=3	PIKFYVE	0.871794	3.57111e-09	139.34	S(0.128)AS(0.872)IT(0.001)NLSLDR	3	0.28412	1	1.07724	1.3326	1.15109	0.641161	0.868173	0.950907
hsa04145 Phagosome	0.381689	6	1.2	Q9Y2I7	105	0.66	Down	0.02364	S	1-phosphatidylinositol 3-phosphate 5-kinase OS=Homo sapiens OX=9606 GN=PIKFYVE PE=1 SV=3	PIKFYVE	0.820699	0.00259039	86.114	RS(0.179)S(0.821)ALDTR	3	0.16314	2	1.26159	1.36454	1.00398	0.690413	0.861582	0.843116
hsa04145 Phagosome	0.381689	6	1.2	P60468	30	0.327	Down	0.00054382	T	Protein transport protein Sec61 subunit beta OS=Homo sapiens OX=9606 GN=SEC61B PE=1 SV=2	SEC61B	1	1.12225e-05	95.815	AAGS(1)T(1)VRQR	2	0.0010213	3	1.32129	1.56073	1.65552	0.549419	0.522211	0.412214
hsa04145 Phagosome	0.381689	6	1.2	P60468	29	0.327	Down	0.00054382	S	Protein transport protein Sec61 subunit beta OS=Homo sapiens OX=9606 GN=SEC61B PE=1 SV=2	SEC61B	1	3.43853e-05	95.815	AAGS(1)T(1)VRQR	2	0.0010213	2	1.32129	1.56073	1.65552	0.549419	0.522211	0.412214
hsa04145 Phagosome	0.381689	6	1.2	P60468	17	0.759	Down	0.020101	S	Protein transport protein Sec61 subunit beta OS=Homo sapiens OX=9606 GN=SEC61B PE=1 SV=2	SEC61B	0.976957	1.64499e-16	172.34	S(0.977)PS(0.023)KAVAAR	2	-0.4398	4	1.18876	1.10121	1.14047	0.75	0.911155	0.943702
hsa04145 Phagosome	0.381689	6	1.2	P20339	193	0.623	Down	0.0026193	S	Ras-related protein Rab-5A OS=Homo sapiens OX=9606 GN=RAB5A PE=1 SV=2	RAB5A	1	1.48385e-07	122.14	NEPQNPGANS(1)AR	3	0.50468	3	1.29517	1.18857	1.18438	0.862069	0.728008	0.696203
hsa04145 Phagosome	0.381689	6	1.2	Q9Y6G9	398	0.754	Down	0.0062155	S	Cytoplasmic dynein 1 light intermediate chain 1 OS=Homo sapiens OX=9606 GN=DYNC1LI1 PE=1 SV=3	DYNC1LI1	1	0.00567252	66.568	PVDAS(1)PR	2	-0.90128	1	1.09841	1.25773	1.06607	0.838681	0.859535	0.883382
hsa04145 Phagosome	0.381689	6	1.2	Q9Y6G9	405	0.757	Down	0.033275	S	Cytoplasmic dynein 1 light intermediate chain 1 OS=Homo sapiens OX=9606 GN=DYNC1LI1 PE=1 SV=3	DYNC1LI1	1	0.045578	40.021	VPGGS(1)PR	2	1.3684	1	1.04021	1.16151	1.2071	0.856506	0.748837	0.975705
hsa04145 Phagosome	0.381689	6	1.2	O75396	137	0.647	Down	7.6122e-05	S	Vesicle-trafficking protein SEC22b OS=Homo sapiens OX=9606 GN=SEC22B PE=1 SV=4	SEC22B	0.999931	1.10551e-37	238.3	RNLGS(1)INTELQDVQR	3	3.4229	3	1.15905	1.22157	1.22857	0.757396	0.772088	0.804928
hsa04145 Phagosome	0.381689	6	1.2	O75396	177	0.569	Down	0.000137681	S	Vesicle-trafficking protein SEC22b OS=Homo sapiens OX=9606 GN=SEC22B PE=1 SV=4	SEC22B	0.998606	1.04154e-05	111.12	ANNLSS(0.001)LS(0.999)KK	3	0.18558	7	1.25746	1.23712	1.28367	0.7643	0.670683	0.716632
hsa00240 Pyrimidine metabolism	0.468108	3	1.2	P27708	1859	0.598	Down	3.74e-05	S	CAD protein OS=Homo sapiens OX=9606 GN=CAD PE=1 SV=3	CAD	1	3.28364e-06	109.22	IHRAS(1)DPGLPAEEPK	5	0.078971	7	1.24473	1.28956	1.18413	0.737548	0.73659	0.749012
hsa00240 Pyrimidine metabolism	0.468108	3	1.2	P27708	1407	0.655	Down	2.1319e-05	S	CAD protein OS=Homo sapiens OX=9606 GN=CAD PE=1 SV=3	CAD	0.970019	0.000325068	112.3	LS(0.027)S(0.97)FVT(0.003)K	2	1.1116	3	1.21364	1.2213	1.15972	0.773946	0.781609	0.798419
hsa00240 Pyrimidine metabolism	0.468108	3	1.2	P17812	568	0.815	Down	0.00030477	S	CTP synthase 1 OS=Homo sapiens OX=9606 GN=CTPS1 PE=1 SV=2	CTPS1	0.961467	1.34577e-10	136.49	DT(0.005)YS(0.961)DRS(0.361)GS(0.612)S(0.73)S(0.33)PDS(0.001)EITELK	3	0.18919	5	1.08643	1.10586	1.11807	0.926263	0.879344	0.892892
hsa00240 Pyrimidine metabolism	0.468108	3	1.2	P17812	573	0.821	Down	0.00032233	S	CTP synthase 1 OS=Homo sapiens OX=9606 GN=CTPS1 PE=1 SV=2	CTPS1	0.98254	1.34577e-10	136.49	DT(0.009)YS(0.813)DRS(0.196)GS(0.983)S(0.909)S(0.685)PDS(0.402)EIT(0.005)ELK	3	0.27915	7	1.08442	1.1038	1.11191	0.930303	0.883205	0.896787
hsa00240 Pyrimidine metabolism	0.468108	3	1.2	Q9BZX2	254	0.528	Down	0.00195769	S	Uridine-cytidine kinase 2 OS=Homo sapiens OX=9606 GN=UCK2 PE=1 SV=1	UCK2	0.995892	0.000318427	83.087	QAS(0.996)ES(0.004)SSRPH	3	0.78958	2	1.45567	1.41921	1.12381	0.726703	0.723384	0.662944
hsa04520 Adherens junction	0.984358	1	0.27	P18031	378	0.398	Down	0.0061765	S	Tyrosine-protein phosphatase non-receptor type 1 OS=Homo sapiens OX=9606 GN=PTPN1 PE=1 SV=1	PTPN1	1	0.00205997	91.064	VVGGS(1)LR	2	0.36443	2	1.38744	1.43004	1.37924	0.610998	0.578422	0.48118
hsa04726 Serotonergic synapse	0.228932	4	1.6	Q14643	1598	0.703	Down	0.036478	S	Inositol 1,4,5-trisphosphate receptor type 1 OS=Homo sapiens OX=9606 GN=ITPR1 PE=1 SV=3	ITPR1	1	0.000592839	104.7	RDS(1)VLAASR	2	-0.66094	2	1.01439	1.22483	1.2934	0.927152	0.863774	0.692376
hsa04726 Serotonergic synapse	0.228932	4	1.6	P17252	497	0.556	Down	0.0033406	T	Protein kinase C alpha type OS=Homo sapiens OX=9606 GN=PRKCA PE=1 SV=4	PRKCA	0.995374	1.9459e-81	290.44	T(0.995)FCGT(0.005)PDYIAPEIIAYQPYGK	4	-0.46556	5	1.39259	1.15755	1.19528	0.594895	0.754116	0.734164
hsa04726 Serotonergic synapse	0.228932	4	1.6	P17612	198	0.632	Down	0.000102671	T	cAMP-dependent protein kinase catalytic subunit alpha OS=Homo sapiens OX=9606 GN=PRKACA PE=1 SV=2	PRKACA	0.985721	1.71589e-53	251.29	T(0.009)WT(0.986)LCGT(0.005)PEYLAPEIILSK	2	0.23372	4	1.2387	1.16367	1.20218	0.758099	0.729104	0.791845
hsa04726 Serotonergic synapse	0.228932	4	1.6	P05771	500	0.478	Down	0.00093695	T	Protein kinase C beta type OS=Homo sapiens OX=9606 GN=PRKCB PE=1 SV=4	PRKCB	0.995374	1.9459e-81	290.44	T(0.995)FCGT(0.005)PDYIAPEIIAYQPYGK	4	-0.46556	6	1.5464	1.18244	1.30737	0.608791	0.644283	0.674528
hsa04726 Serotonergic synapse	0.228932	4	1.6	P05771	504	0.692	Down	0.00020151	T	Protein kinase C beta type OS=Homo sapiens OX=9606 GN=PRKCB PE=1 SV=4	PRKCB	0.80982	4.41108e-11	148.75	T(0.19)FCGT(0.81)PDYIAPEIIAYQPYGK	3	0.69537	2	1.18248	1.20488	1.13603	0.825275	0.834846	0.776415
hsa01524 Platinum drug resistance	0.359561	4	1.32	P52701	309	0.738	Down	0.00185657	S	DNA mismatch repair protein Msh6 OS=Homo sapiens OX=9606 GN=MSH6 PE=1 SV=2	MSH6	0.999627	0.054128	54.871	MVTGNGS(1)LKR	3	0.64218	1	1.22015	1.11645	1.1767	0.813875	0.869015	0.910543
hsa01524 Platinum drug resistance	0.359561	4	1.32	Q02880	1552	0.676	Down	0.00161528	S	DNA topoisomerase 2-beta OS=Homo sapiens OX=9606 GN=TOP2B PE=1 SV=3	TOP2B	1	1.69763e-16	171.33	KAS(1)GS(1)ENEGDYNPGR	3	-0.2167	6	1.17561	1.21341	1.12027	0.748497	0.757986	0.865088
hsa01524 Platinum drug resistance	0.359561	4	1.32	Q02880	1424	0.68	Down	0.0006377	S	DNA topoisomerase 2-beta OS=Homo sapiens OX=9606 GN=TOP2B PE=1 SV=3	TOP2B	0.916443	1.32279e-19	174.33	ASPITNDGEDEFVPS(1)DGLDKDEYT(0.084)FS(0.916)PGK	3	0.60196	6	1.1639	1.22459	1.11174	0.772545	0.769603	0.839341
hsa01524 Platinum drug resistance	0.359561	4	1.32	Q02880	1550	0.503	Down	0.00043951	S	DNA topoisomerase 2-beta OS=Homo sapiens OX=9606 GN=TOP2B PE=1 SV=3	TOP2B	1	2.37823e-07	118.76	KAS(1)GS(1)ENEGDYNPGR	3	-0.2167	3	1.3522	1.32622	1.20644	0.611222	0.620523	0.723996
hsa01524 Platinum drug resistance	0.359561	4	1.32	Q02880	1466	0.817	Down	0.021925	S	DNA topoisomerase 2-beta OS=Homo sapiens OX=9606 GN=TOP2B PE=1 SV=3	TOP2B	0.999999	1.01762e-23	190.87	S(0.007)EDDS(0.993)AKFDS(1)NEEDSASVFSPSFGLK	4	-0.23598	8	1.08585	1.15346	1.01515	0.866733	0.834463	0.958805
hsa01524 Platinum drug resistance	0.359561	4	1.32	Q02880	1471	0.787	Down	0.0084395	S	DNA topoisomerase 2-beta OS=Homo sapiens OX=9606 GN=TOP2B PE=1 SV=3	TOP2B	0.897508	3.77204e-17	165.85	SEDDSAKFDS(0.065)NEEDS(0.898)AS(0.038)VFSPSFGLK	3	-0.19451	2	1.12683	1.15955	1.01894	0.824649	0.863504	0.914521
hsa01524 Platinum drug resistance	0.359561	4	1.32	P11388	1377	0.83	Down	0.00021825	S	DNA topoisomerase 2-alpha OS=Homo sapiens OX=9606 GN=TOP2A PE=1 SV=3	TOP2A	1	7.11152e-26	213.16	S(1)VVS(1)DLEADDVK	2	-0.94973	9	1.11373	1.10969	1.0855	0.89618	0.934803	0.91573
hsa01524 Platinum drug resistance	0.359561	4	1.32	P11388	1392	0.77	Down	0.00144338	S	DNA topoisomerase 2-alpha OS=Homo sapiens OX=9606 GN=TOP2A PE=1 SV=3	TOP2A	0.830339	2.18115e-09	130.2	GS(0.001)VPLS(0.214)S(0.83)S(0.954)PPAT(0.001)HFPDETEITNPVPK	3	-0.16486	1	1.15779	1.0852	1.18506	0.915769	0.856184	0.867978
hsa01524 Platinum drug resistance	0.359561	4	1.32	P11388	1374	0.822	Down	0.0021567	S	DNA topoisomerase 2-alpha OS=Homo sapiens OX=9606 GN=TOP2A PE=1 SV=3	TOP2A	1	1.74502e-56	267.84	S(1)VVS(1)DLEADDVK	2	-0.94973	8	1.09016	1.10437	1.12771	0.863859	0.932886	0.935393
hsa01524 Platinum drug resistance	0.359561	4	1.32	P11388	1213	0.807	Down	0.024516	S	DNA topoisomerase 2-alpha OS=Homo sapiens OX=9606 GN=TOP2A PE=1 SV=3	TOP2A	1	2.17938e-07	125.33	TQMAEVLPS(1)PR	3	-0.032517	4	1.06045	1.18104	1.11255	0.999021	0.841802	0.864232
hsa01524 Platinum drug resistance	0.359561	4	1.32	P38398	1217	0.783	Down	0.024462	S	Breast cancer type 1 susceptibility protein OS=Homo sapiens OX=9606 GN=BRCA1 PE=1 SV=2	BRCA1	0.999402	7.82734e-13	151.23	KLES(0.744)S(0.258)EENLS(0.999)S(0.999)EDEELPCFQHLLFGK	4	-0.10735	4	0.990431	1.24281	1.12821	0.869652	0.909001	0.853705
hsa01524 Platinum drug resistance	0.359561	4	1.32	P38398	1218	0.783	Down	0.024462	S	Breast cancer type 1 susceptibility protein OS=Homo sapiens OX=9606 GN=BRCA1 PE=1 SV=2	BRCA1	0.999638	7.82734e-13	151.23	KLESS(0.001)EENLS(0.999)S(1)EDEELPCFQHLLFGK	3	0.68017	4	0.990431	1.24281	1.12821	0.869652	0.909001	0.853705
hsa04672 Intestinal immune network for IgA production	0.692948	1	0.93	P61073	324	0.701	Down	0.0054784	S	C-X-C chemokine receptor type 4 OS=Homo sapiens OX=9606 GN=CXCR4 PE=1 SV=1	CXCR4	0.920219	0.00213128	63.823	T(0.001)S(0.001)AQHALT(0.382)S(0.613)VS(0.087)RGS(0.92)S(0.997)LK	3	-0.23414	2	1.25606	1.16719	1.11144	0.780415	0.777385	0.918691
hsa04672 Intestinal immune network for IgA production	0.692948	1	0.93	P61073	319	0.705	Down	0.003621	S	C-X-C chemokine receptor type 4 OS=Homo sapiens OX=9606 GN=CXCR4 PE=1 SV=1	CXCR4	0.760771	0.000301597	80.411	T(0.001)S(0.001)AQHALT(0.196)S(0.761)VS(0.693)RGS(0.691)S(0.658)LK	4	0.36454	4	1.22339	1.18286	1.11933	0.817013	0.759717	0.907075
hsa04672 Intestinal immune network for IgA production	0.692948	1	0.93	P61073	325	0.701	Down	0.0054784	S	C-X-C chemokine receptor type 4 OS=Homo sapiens OX=9606 GN=CXCR4 PE=1 SV=1	CXCR4	0.99708	0.00213128	63.823	T(0.001)S(0.001)AQHALT(0.382)S(0.613)VS(0.087)RGS(0.92)S(0.997)LK	3	-0.23414	2	1.25606	1.16719	1.11144	0.780415	0.777385	0.918691
hsa00030 Pentose phosphate pathway	0.555962	2	1.12	P04075	39	0.736	Down	0.006221	S	Fructose-bisphosphate aldolase A OS=Homo sapiens OX=9606 GN=ALDOA PE=1 SV=2	ALDOA	0.997634	1.55456e-05	102.64	GILAADEST(0.002)GS(0.998)IAK	3	-0.60346	1	1.22671	1.11538	1.1849	0.821296	0.817453	0.956481
hsa00030 Pentose phosphate pathway	0.555962	2	1.12	P04075	46	0.819	Down	0.0028408	S	Fructose-bisphosphate aldolase A OS=Homo sapiens OX=9606 GN=ALDOA PE=1 SV=2	ALDOA	0.861181	0.000336077	80.389	LQS(0.861)IGT(0.105)ENT(0.034)EENR	2	0.60637	1	1.0954	1.15837	1.09737	0.876852	0.912734	0.95463
hsa00030 Pentose phosphate pathway	0.555962	2	1.12	P11413	401	0.81	Down	0.035635	Y	Glucose-6-phosphate 1-dehydrogenase OS=Homo sapiens OX=9606 GN=G6PD PE=1 SV=4	G6PD	0.960981	0.000137924	88.338	VQPNEAVY(0.961)T(0.039)K	3	0.4039	2	1.03519	1.10486	1.14215	0.959096	0.918468	0.782218
hsa04920 Adipocytokine signaling pathway	0.468108	3	1.2	P42345	2448	0.83	Down	0.0090564	S	Serine/threonine-protein kinase mTOR OS=Homo sapiens OX=9606 GN=MTOR PE=1 SV=1	MTOR	0.805907	4.74526e-23	180.79	T(0.173)DS(0.806)YS(0.021)AGQSVEILDGVELGEPAHK	3	0.87519	2	1.11547	1.11778	1.04615	0.858614	0.962049	0.900875
hsa04920 Adipocytokine signaling pathway	0.468108	3	1.2	P11166	490	0.804	Down	0.033061	S	Solute carrier family 2, facilitated glucose transporter member 1 OS=Homo sapiens OX=9606 GN=SLC2A1 PE=1 SV=2	SLC2A1	0.999997	0.0016421	65.231	TPEELFHPLGADS(1)QV	3	-0.85549	1	1.22854	1.18885	0.994845	0.890386	0.930823	0.922925
hsa04920 Adipocytokine signaling pathway	0.468108	3	1.2	P11166	473	0.718	Down	0.035703	S	Solute carrier family 2, facilitated glucose transporter member 1 OS=Homo sapiens OX=9606 GN=SLC2A1 PE=1 SV=2	SLC2A1	0.923363	6.12552e-17	171.94	QGGAS(0.923)QS(0.069)DKT(0.007)PEELFHPLGADSQV	4	-0.80699	2	1.23821	1.36291	0.989691	0.906559	0.787215	0.883399
hsa04920 Adipocytokine signaling pathway	0.468108	3	1.2	Q04759	538	0.682	Down	0.0054007	T	Protein kinase C theta type OS=Homo sapiens OX=9606 GN=PRKCQ PE=1 SV=3	PRKCQ	0.758097	1.56803e-16	173.32	T(0.236)NT(0.758)FCGT(0.006)PDYIAPEILLGQK	4	-0.56803	2	1.29281	1.13714	1.15307	0.729626	0.887195	0.826693
hsa04920 Adipocytokine signaling pathway	0.468108	3	1.2	Q04759	542	0.664	Down	0.0046812	T	Protein kinase C theta type OS=Homo sapiens OX=9606 GN=PRKCQ PE=1 SV=3	PRKCQ	0.800787	1.43662e-16	174.28	T(0.022)NT(0.178)FCGT(0.801)PDYIAPEILLGQK	2	-1.3442	1	1.3129	1.17718	1.12487	0.753595	0.756098	0.891434
hsa04611 Platelet activation	0.304657	8	1.25	Q14643	1598	0.703	Down	0.036478	S	Inositol 1,4,5-trisphosphate receptor type 1 OS=Homo sapiens OX=9606 GN=ITPR1 PE=1 SV=3	ITPR1	1	0.000592839	104.7	RDS(1)VLAASR	2	-0.66094	2	1.01439	1.22483	1.2934	0.927152	0.863774	0.692376
hsa04611 Platelet activation	0.304657	8	1.25	Q13464	1341	0.769	Down	0.00165903	S	Rho-associated protein kinase 1 OS=Homo sapiens OX=9606 GN=ROCK1 PE=1 SV=1	ROCK1	0.999984	0.0015088	73.273	STANQS(1)FRK	3	-0.19239	4	1.06273	1.13722	1.15035	0.840625	0.835176	0.901554
hsa04611 Platelet activation	0.304657	8	1.25	P62136	325	0.751	Down	0.0053385	S	Serine/threonine-protein phosphatase PP1-alpha catalytic subunit OS=Homo sapiens OX=9606 GN=PPP1CA PE=1 SV=1	PPP1CA	0.992523	0.0125529	46.068	PIT(0.007)PPRNS(0.993)AK	3	-0.90431	1	1.18208	1.07692	1.17159	0.789474	0.873474	0.91309
hsa04611 Platelet activation	0.304657	8	1.25	Q13586	667	0.816	Down	0.048975	S	Stromal interaction molecule 1 OS=Homo sapiens OX=9606 GN=STIM1 PE=1 SV=3	STIM1	0.82601	6.33196e-42	235.42	AVAEEDNGS(0.008)IGEET(0.111)DS(0.826)S(0.055)PGR	2	-1.5861	3	1.111	1.10029	1.09372	0.859375	0.851222	0.98497
hsa04611 Platelet activation	0.304657	8	1.25	Q13586	567	0.647	Down	0.00077867	S	Stromal interaction molecule 1 OS=Homo sapiens OX=9606 GN=STIM1 PE=1 SV=3	STIM1	1	1.58245e-11	139.88	LIEGVHPGS(1)LVEK	3	-0.54976	1	1.17583	1.26155	1.18847	0.776367	0.841658	0.727455
hsa04611 Platelet activation	0.304657	8	1.25	Q9NRY4	589	0.755	Down	0.0100563	S	Rho GTPase-activating protein 35 OS=Homo sapiens OX=9606 GN=ARHGAP35 PE=1 SV=3	ARHGAP35	0.950843	0.000851583	73.802	NS(0.951)LS(0.049)DPNIDR	2	2.1282	1	1.111	1.1483	1.09325	0.75	0.918762	0.863546
hsa04611 Platelet activation	0.304657	8	1.25	P17612	198	0.632	Down	0.000102671	T	cAMP-dependent protein kinase catalytic subunit alpha OS=Homo sapiens OX=9606 GN=PRKACA PE=1 SV=2	PRKACA	0.985721	1.71589e-53	251.29	T(0.009)WT(0.986)LCGT(0.005)PEYLAPEIILSK	2	0.23372	4	1.2387	1.16367	1.20218	0.758099	0.729104	0.791845
hsa04611 Platelet activation	0.304657	8	1.25	Q7Z5R6	526	0.652	Down	0.0143363	S	Amyloid beta A4 precursor protein-binding family B member 1-interacting protein OS=Homo sapiens OX=9606 GN=APBB1IP PE=1 SV=1	APBB1IP	0.92821	4.0231e-11	150.65	RS(0.035)S(0.928)DT(0.035)S(0.001)GSPATPLK	2	-0.078846	1	1.15298	1.37895	1.07523	0.713456	0.898855	0.740561
hsa04611 Platelet activation	0.304657	8	1.25	Q7LDG7	576	0.683	Down	0.0065568	S	RAS guanyl-releasing protein 2 OS=Homo sapiens OX=9606 GN=RASGRP2 PE=1 SV=1	RASGRP2	0.99837	0.000103531	117.7	AFS(0.998)FS(0.002)LPRPGR	3	-0.42913	3	1.09429	1.21435	1.17734	0.793933	0.796537	0.789364
hsa04380 Osteoclast differentiation	0.994248	1	0.22	P06239	192	0.769	Down	0.021855	Y	Tyrosine-protein kinase Lck OS=Homo sapiens OX=9606 GN=LCK PE=1 SV=6	LCK	0.999949	1.76854e-25	204.94	NLDNGGFY(1)ISPR	3	-0.12288	5	1.03582	1.18558	1.10636	0.844091	0.85497	0.858729
hsa04972 Pancreatic secretion	0.315256	4	1.4	Q14643	1598	0.703	Down	0.036478	S	Inositol 1,4,5-trisphosphate receptor type 1 OS=Homo sapiens OX=9606 GN=ITPR1 PE=1 SV=3	ITPR1	1	0.000592839	104.7	RDS(1)VLAASR	2	-0.66094	2	1.01439	1.22483	1.2934	0.927152	0.863774	0.692376
hsa04972 Pancreatic secretion	0.315256	4	1.4	P17252	497	0.556	Down	0.0033406	T	Protein kinase C alpha type OS=Homo sapiens OX=9606 GN=PRKCA PE=1 SV=4	PRKCA	0.995374	1.9459e-81	290.44	T(0.995)FCGT(0.005)PDYIAPEIIAYQPYGK	4	-0.46556	5	1.39259	1.15755	1.19528	0.594895	0.754116	0.734164
hsa04972 Pancreatic secretion	0.315256	4	1.4	P23634	1162	0.631	Down	0.00176272	S	Plasma membrane calcium-transporting ATPase 4 OS=Homo sapiens OX=9606 GN=ATP2B4 PE=1 SV=2	ATP2B4	0.800467	4.35877e-16	168.84	S(0.8)IHS(0.2)FMTHPEFAIEEELPR	3	-1.679	1	1.26036	1.25982	1.1084	0.721946	0.733673	0.832833
hsa04972 Pancreatic secretion	0.315256	4	1.4	P05771	500	0.478	Down	0.00093695	T	Protein kinase C beta type OS=Homo sapiens OX=9606 GN=PRKCB PE=1 SV=4	PRKCB	0.995374	1.9459e-81	290.44	T(0.995)FCGT(0.005)PDYIAPEIIAYQPYGK	4	-0.46556	6	1.5464	1.18244	1.30737	0.608791	0.644283	0.674528
hsa04972 Pancreatic secretion	0.315256	4	1.4	P05771	504	0.692	Down	0.00020151	T	Protein kinase C beta type OS=Homo sapiens OX=9606 GN=PRKCB PE=1 SV=4	PRKCB	0.80982	4.41108e-11	148.75	T(0.19)FCGT(0.81)PDYIAPEIIAYQPYGK	3	0.69537	2	1.18248	1.20488	1.13603	0.825275	0.834846	0.776415
hsa05161 Hepatitis B	0.960234	5	0.56	P17252	497	0.556	Down	0.0033406	T	Protein kinase C alpha type OS=Homo sapiens OX=9606 GN=PRKCA PE=1 SV=4	PRKCA	0.995374	1.9459e-81	290.44	T(0.995)FCGT(0.005)PDYIAPEIIAYQPYGK	4	-0.46556	5	1.39259	1.15755	1.19528	0.594895	0.754116	0.734164
hsa05161 Hepatitis B	0.960234	5	0.56	O00571	74	0.591	Down	0.0037843	S	ATP-dependent RNA helicase DDX3X OS=Homo sapiens OX=9606 GN=DDX3X PE=1 SV=3	DDX3X	0.998503	9.08988e-05	86.497	DKDAYSS(0.001)FGS(0.999)R	3	-0.032918	1	1.31435	1.27463	1.16816	0.834511	0.633045	0.752239
hsa05161 Hepatitis B	0.960234	5	0.56	O00571	612	0.647	Down	0.00199666	S	ATP-dependent RNA helicase DDX3X OS=Homo sapiens OX=9606 GN=DDX3X PE=1 SV=3	DDX3X	0.932491	4.81154e-05	95.429	QSSGASS(0.006)S(0.058)S(0.932)FS(0.002)SSR	2	0.32894	2	1.29747	1.22488	1.10945	0.792129	0.726225	0.831841
hsa05161 Hepatitis B	0.960234	5	0.56	O00571	90	0.697	Down	0.00031862	S	ATP-dependent RNA helicase DDX3X OS=Homo sapiens OX=9606 GN=DDX3X PE=1 SV=3	DDX3X	0.951341	0.00936803	63.462	SSFFS(0.005)DRGS(0.951)GS(0.044)R	3	0.10031	2	1.16983	1.14925	1.20896	0.860747	0.782901	0.814925
hsa05161 Hepatitis B	0.960234	5	0.56	O00571	594	0.767	Down	0.0132407	S	ATP-dependent RNA helicase DDX3X OS=Homo sapiens OX=9606 GN=DDX3X PE=1 SV=3	DDX3X	1	0.00844407	60.167	FS(1)GGFGAR	2	0.022108	2	1.14557	1.23582	1.00597	0.887992	0.845341	0.864677
hsa05161 Hepatitis B	0.960234	5	0.56	O00571	102	0.716	Down	0.004839	S	ATP-dependent RNA helicase DDX3X OS=Homo sapiens OX=9606 GN=DDX3X PE=1 SV=3	DDX3X	0.999971	9.93109e-05	94.45	GRS(1)DYDGIGSR	2	-1.8922	1	1.12342	1.28657	1.06766	0.822402	0.807877	0.859701
hsa05161 Hepatitis B	0.960234	5	0.56	O00571	109	0.79	Down	0.00104224	S	ATP-dependent RNA helicase DDX3X OS=Homo sapiens OX=9606 GN=DDX3X PE=1 SV=3	DDX3X	0.999999	0.00156426	73.296	SDYDGIGS(1)RGDR	2	-1.6608	1	1.14873	1.12239	1.0796	0.848638	0.912584	0.884577
hsa05161 Hepatitis B	0.960234	5	0.56	O00571	82	0.697	Down	0.0035984	S	ATP-dependent RNA helicase DDX3X OS=Homo sapiens OX=9606 GN=DDX3X PE=1 SV=3	DDX3X	0.971209	0.000248451	93.839	GKS(0.971)S(0.029)FFSDR	3	-0.51563	3	1.25105	1.15224	1.12637	0.834511	0.744476	0.881592
hsa05161 Hepatitis B	0.960234	5	0.56	O00571	609	0.815	Down	0.0063553	S	ATP-dependent RNA helicase DDX3X OS=Homo sapiens OX=9606 GN=DDX3X PE=1 SV=3	DDX3X	0.97646	7.16068e-16	159.06	QSS(0.001)GAS(0.976)S(0.021)S(0.001)SFSSSR	2	0.10646	1	1.0981	1.14527	1.0607	0.944501	0.845341	0.903483
hsa05161 Hepatitis B	0.960234	5	0.56	P36507	306	0.695	Down	0.0148639	S	Dual specificity mitogen-activated protein kinase kinase 2 OS=Homo sapiens OX=9606 GN=MAP2K2 PE=1 SV=1	MAP2K2	0.999855	0.0114831	47.75	PRPPGRPVS(1)GHGMDSR	4	-1.4169	2	1.32853	1.15015	1.03137	0.736426	0.838773	0.863281
hsa05161 Hepatitis B	0.960234	5	0.56	P06400	866	0.604	Down	0.00020446	S	Retinoblastoma-associated protein OS=Homo sapiens OX=9606 GN=RB1 PE=1 SV=2	RB1	0.999535	0.000334169	75.018	SAEGS(1)NPPKPLKK	3	0.67716	1	1.2809	1.23275	1.22143	0.750996	0.799603	0.704825
hsa05161 Hepatitis B	0.960234	5	0.56	P06400	606	0.82	Down	0.0024033	Y	Retinoblastoma-associated protein OS=Homo sapiens OX=9606 GN=RB1 PE=1 SV=2	RB1	0.758945	9.41717e-06	73.227	EGPTDHLESACPLNLPLQNNHT(0.441)AADMY(0.759)LS(0.787)PVRS(0.012)PK	3	0.89538	3	1.12666	1.06797	1.10714	0.860558	0.935516	0.910123
hsa05161 Hepatitis B	0.960234	5	0.56	P05771	500	0.478	Down	0.00093695	T	Protein kinase C beta type OS=Homo sapiens OX=9606 GN=PRKCB PE=1 SV=4	PRKCB	0.995374	1.9459e-81	290.44	T(0.995)FCGT(0.005)PDYIAPEIIAYQPYGK	4	-0.46556	6	1.5464	1.18244	1.30737	0.608791	0.644283	0.674528
hsa05161 Hepatitis B	0.960234	5	0.56	P05771	504	0.692	Down	0.00020151	T	Protein kinase C beta type OS=Homo sapiens OX=9606 GN=PRKCB PE=1 SV=4	PRKCB	0.80982	4.41108e-11	148.75	T(0.19)FCGT(0.81)PDYIAPEIIAYQPYGK	3	0.69537	2	1.18248	1.20488	1.13603	0.825275	0.834846	0.776415
hsa04727 GABAergic synapse	0.205768	3	1.87	P17252	497	0.556	Down	0.0033406	T	Protein kinase C alpha type OS=Homo sapiens OX=9606 GN=PRKCA PE=1 SV=4	PRKCA	0.995374	1.9459e-81	290.44	T(0.995)FCGT(0.005)PDYIAPEIIAYQPYGK	4	-0.46556	5	1.39259	1.15755	1.19528	0.594895	0.754116	0.734164
hsa04727 GABAergic synapse	0.205768	3	1.87	P17612	198	0.632	Down	0.000102671	T	cAMP-dependent protein kinase catalytic subunit alpha OS=Homo sapiens OX=9606 GN=PRKACA PE=1 SV=2	PRKACA	0.985721	1.71589e-53	251.29	T(0.009)WT(0.986)LCGT(0.005)PEYLAPEIILSK	2	0.23372	4	1.2387	1.16367	1.20218	0.758099	0.729104	0.791845
hsa04727 GABAergic synapse	0.205768	3	1.87	P05771	500	0.478	Down	0.00093695	T	Protein kinase C beta type OS=Homo sapiens OX=9606 GN=PRKCB PE=1 SV=4	PRKCB	0.995374	1.9459e-81	290.44	T(0.995)FCGT(0.005)PDYIAPEIIAYQPYGK	4	-0.46556	6	1.5464	1.18244	1.30737	0.608791	0.644283	0.674528
hsa04727 GABAergic synapse	0.205768	3	1.87	P05771	504	0.692	Down	0.00020151	T	Protein kinase C beta type OS=Homo sapiens OX=9606 GN=PRKCB PE=1 SV=4	PRKCB	0.80982	4.41108e-11	148.75	T(0.19)FCGT(0.81)PDYIAPEIIAYQPYGK	3	0.69537	2	1.18248	1.20488	1.13603	0.825275	0.834846	0.776415
hsa05169 Epstein-Barr virus infection	0.970966	6	0.56	Q96ST3	277	0.781	Down	0.0047232	S	Paired amphipathic helix protein Sin3a OS=Homo sapiens OX=9606 GN=SIN3A PE=1 SV=2	SIN3A	0.997372	9.49261e-14	119.99	S(0.997)PPVQPHT(0.003)PVTISLGTAPSLQNNQPVEFNHAINYVNK	4	-0.8178	4	1.12941	1.07744	1.09715	0.844028	0.806545	0.928866
hsa05169 Epstein-Barr virus infection	0.970966	6	0.56	P08670	10	0.529	Down	0.000182894	S	Vimentin OS=Homo sapiens OX=9606 GN=VIM PE=1 SV=4	VIM	0.982483	0.000363621	105.52	SVSS(0.009)S(0.009)S(0.982)YRR	2	0.17887	2	1.1814	1.38027	1.22605	0.665598	0.66	0.679712
hsa05169 Epstein-Barr virus infection	0.970966	6	0.56	P08670	51	0.599	Down	0.0071424	S	Vimentin OS=Homo sapiens OX=9606 GN=VIM PE=1 SV=4	VIM	0.977705	2.68401e-11	145.82	S(0.978)LYAS(0.016)S(0.006)PGGVYATR	2	-1.1989	2	1.20279	1.05172	1.40613	0.777778	0.653684	0.762101
hsa05169 Epstein-Barr virus infection	0.970966	6	0.56	P48556	106	0.662	Down	0.002485	S	26S proteasome non-ATPase regulatory subunit 8 OS=Homo sapiens OX=9606 GN=PSMD8 PE=1 SV=2	PSMD8	0.989385	0.0385119	42.336	KS(0.989)PNLS(0.011)K	3	0.078512	1	1.21668	1.26559	1.14911	0.729677	0.880906	0.794007
hsa05169 Epstein-Barr virus infection	0.970966	6	0.56	P62195	120	0.665	Down	0.0054831	S	26S proteasome regulatory subunit 8 OS=Homo sapiens OX=9606 GN=PSMC5 PE=1 SV=1	PSMC5	0.813207	0.0115202	47.844	NDS(0.813)Y(0.002)T(0.184)LHK	3	0.43384	1	1.27071	1.12237	1.18845	0.695305	0.818548	0.867632
hsa05169 Epstein-Barr virus infection	0.970966	6	0.56	P06400	866	0.604	Down	0.00020446	S	Retinoblastoma-associated protein OS=Homo sapiens OX=9606 GN=RB1 PE=1 SV=2	RB1	0.999535	0.000334169	75.018	SAEGS(1)NPPKPLKK	3	0.67716	1	1.2809	1.23275	1.22143	0.750996	0.799603	0.704825
hsa05169 Epstein-Barr virus infection	0.970966	6	0.56	P06400	606	0.82	Down	0.0024033	Y	Retinoblastoma-associated protein OS=Homo sapiens OX=9606 GN=RB1 PE=1 SV=2	RB1	0.758945	9.41717e-06	73.227	EGPTDHLESACPLNLPLQNNHT(0.441)AADMY(0.759)LS(0.787)PVRS(0.012)PK	3	0.89538	3	1.12666	1.06797	1.10714	0.860558	0.935516	0.910123
hsa05169 Epstein-Barr virus infection	0.970966	6	0.56	Q16186	224	0.59	Down	0.0081987	S	Proteasomal ubiquitin receptor ADRM1 OS=Homo sapiens OX=9606 GN=ADRM1 PE=1 SV=2	ADRM1	0.989665	1.13562e-22	177.09	SQSAAVTPSSTTS(0.009)S(0.99)T(0.001)R	2	-0.15919	1	1.00771	1.34408	1.37449	0.783246	0.725	0.68861
hsa04932 Non-alcoholic fatty liver disease (NAFLD)	0.517262	3	1.12	P31040	177	0.816	Down	0.022898	S	Succinate dehydrogenase [ubiquinone] flavoprotein subunit, mitochondrial OS=Homo sapiens OX=9606 GN=SDHA PE=1 SV=2	SDHA	1	0.0028298	71.03	AFGGQS(1)LK	2	0.11338	1	1.11902	1.08509	1.09476	0.923541	0.966834	0.800604
hsa04932 Non-alcoholic fatty liver disease (NAFLD)	0.517262	3	1.12	P55210	37	0.601	Down	0.0025624	S	Caspase-7 OS=Homo sapiens OX=9606 GN=CASP7 PE=1 SV=1	CASP7	0.998199	9.95497e-06	109.15	SSFVPS(0.002)LFS(0.998)K	3	0.29139	1	1.2039	1.32334	1.2	0.82659	0.760255	0.652091
hsa04932 Non-alcoholic fatty liver disease (NAFLD)	0.517262	3	1.12	P49841	25	0.731	Down	0.027898	S	Glycogen synthase kinase-3 beta OS=Homo sapiens OX=9606 GN=GSK3B PE=1 SV=2	GSK3B	0.874741	0.00134329	63.297	TTSFAESCKPVQQPS(0.125)AFGS(0.875)MK	4	-0.41305	1	1.28728	1.04314	1.14033	0.786368	0.968894	0.782038
hsa04640 Hematopoietic cell lineage	0.923121	1	0.43	P06127	434	0.337	Down	0.00105985	T	T-cell surface glycoprotein CD5 OS=Homo sapiens OX=9606 GN=CD5 PE=1 SV=2	CD5	0.999161	0.00133433	106.2	NHT(0.999)AT(0.001)VR	3	0.27703	3	1.34304	1.31423	1.59001	0.578669	0.389497	0.461457
hsa04625 C-type lectin receptor signaling pathway	0.943671	3	0.53	Q14643	1598	0.703	Down	0.036478	S	Inositol 1,4,5-trisphosphate receptor type 1 OS=Homo sapiens OX=9606 GN=ITPR1 PE=1 SV=3	ITPR1	1	0.000592839	104.7	RDS(1)VLAASR	2	-0.66094	2	1.01439	1.22483	1.2934	0.927152	0.863774	0.692376
hsa04625 C-type lectin receptor signaling pathway	0.943671	3	0.53	P33241	204	0.693	Down	0.0135383	S	Lymphocyte-specific protein 1 OS=Homo sapiens OX=9606 GN=LSP1 PE=1 SV=1	LSP1	0.989354	5.03266e-05	100.02	LIDRT(0.011)ES(0.989)LNR	2	-0.21028	4	1.33824	1.15982	1.10614	0.75304	0.80276	0.940452
hsa04625 C-type lectin receptor signaling pathway	0.943671	3	0.53	P33241	193	0.813	Down	0.0170816	S	Lymphocyte-specific protein 1 OS=Homo sapiens OX=9606 GN=LSP1 PE=1 SV=1	LSP1	0.968671	3.99058e-31	196.9	T(0.391)PS(0.609)PLVLEGTIEQS(0.487)S(0.513)PPLS(0.969)PT(0.025)T(0.006)K	3	0.88586	23	1.19652	1.09323	1.03434	0.87766	0.868506	0.956879
hsa04625 C-type lectin receptor signaling pathway	0.943671	3	0.53	Q05655	664	0.731	Down	0.00054074	S	Protein kinase C delta type OS=Homo sapiens OX=9606 GN=PRKCD PE=1 SV=2	PRKCD	0.999989	1.90749e-07	125.39	NLIDSMDQSAFAGFS(1)FVNPK	3	-0.57978	2	1.19849	1.2	1.14664	0.910433	0.849693	0.831933
hsa04625 C-type lectin receptor signaling pathway	0.943671	3	0.53	Q05655	507	0.78	Down	0.009376	T	Protein kinase C delta type OS=Homo sapiens OX=9606 GN=PRKCD PE=1 SV=2	PRKCD	0.997669	2.44866e-81	296.17	AS(0.002)T(0.998)FCGTPDYIAPEILQGLK	2	0.5926	3	1.14563	1.12323	1.18432	0.991142	0.860941	0.841387
hsa05219 Bladder cancer	0.74321	2	0.8	P36507	306	0.695	Down	0.0148639	S	Dual specificity mitogen-activated protein kinase kinase 2 OS=Homo sapiens OX=9606 GN=MAP2K2 PE=1 SV=1	MAP2K2	0.999855	0.0114831	47.75	PRPPGRPVS(1)GHGMDSR	4	-1.4169	2	1.32853	1.15015	1.03137	0.736426	0.838773	0.863281
hsa05219 Bladder cancer	0.74321	2	0.8	P06400	866	0.604	Down	0.00020446	S	Retinoblastoma-associated protein OS=Homo sapiens OX=9606 GN=RB1 PE=1 SV=2	RB1	0.999535	0.000334169	75.018	SAEGS(1)NPPKPLKK	3	0.67716	1	1.2809	1.23275	1.22143	0.750996	0.799603	0.704825
hsa05219 Bladder cancer	0.74321	2	0.8	P06400	606	0.82	Down	0.0024033	Y	Retinoblastoma-associated protein OS=Homo sapiens OX=9606 GN=RB1 PE=1 SV=2	RB1	0.758945	9.41717e-06	73.227	EGPTDHLESACPLNLPLQNNHT(0.441)AADMY(0.759)LS(0.787)PVRS(0.012)PK	3	0.89538	3	1.12666	1.06797	1.10714	0.860558	0.935516	0.910123
hsa04142 Lysosome	0.416856	3	1.29	P11717	2350	0.518	Down	0.0025414	S	Cation-independent mannose-6-phosphate receptor OS=Homo sapiens OX=9606 GN=IGF2R PE=1 SV=3	IGF2R	0.99991	0.0017358	94.692	SSNVS(1)YK	2	-1.5566	1	1.31917	1.37758	1.18806	0.579637	0.784474	0.648129
hsa04142 Lysosome	0.416856	3	1.29	P11717	2354	0.564	Down	0.0165397	S	Cation-independent mannose-6-phosphate receptor OS=Homo sapiens OX=9606 GN=IGF2R PE=1 SV=3	IGF2R	0.972668	0.0120035	47.037	SSNVS(0.002)Y(0.001)KY(0.024)S(0.973)K	3	0.59541	1	1.37352	1.24484	1.16517	0.534274	0.860061	0.740142
hsa04142 Lysosome	0.416856	3	1.29	O00203	750	0.813	Down	0.0021985	S	AP-3 complex subunit beta-1 OS=Homo sapiens OX=9606 GN=AP3B1 PE=1 SV=3	AP3B1	1	0.000165051	84.166	GKS(1)DS(1)EDGEKENEK	3	-0.26142	1	1.12463	1.084	1.07708	0.897833	0.846979	0.926927
hsa04142 Lysosome	0.416856	3	1.29	O00203	752	0.813	Down	0.0021985	S	AP-3 complex subunit beta-1 OS=Homo sapiens OX=9606 GN=AP3B1 PE=1 SV=3	AP3B1	1	0.000165051	84.166	GKS(1)DS(1)EDGEKENEK	3	-0.26142	1	1.12463	1.084	1.07708	0.897833	0.846979	0.926927
hsa04142 Lysosome	0.416856	3	1.29	O14617	658	0.759	Down	0.0183635	S	AP-3 complex subunit delta-1 OS=Homo sapiens OX=9606 GN=AP3D1 PE=1 SV=1	AP3D1	1	4.29459e-16	167.28	HRPS(1)EADEEELAR	3	0.23892	1	1.08142	1.25283	1.09018	0.961732	0.817269	0.819828
hsa05143 African trypanosomiasis	0.363003	2	1.6	P17252	497	0.556	Down	0.0033406	T	Protein kinase C alpha type OS=Homo sapiens OX=9606 GN=PRKCA PE=1 SV=4	PRKCA	0.995374	1.9459e-81	290.44	T(0.995)FCGT(0.005)PDYIAPEIIAYQPYGK	4	-0.46556	5	1.39259	1.15755	1.19528	0.594895	0.754116	0.734164
hsa05143 African trypanosomiasis	0.363003	2	1.6	P05771	500	0.478	Down	0.00093695	T	Protein kinase C beta type OS=Homo sapiens OX=9606 GN=PRKCB PE=1 SV=4	PRKCB	0.995374	1.9459e-81	290.44	T(0.995)FCGT(0.005)PDYIAPEIIAYQPYGK	4	-0.46556	6	1.5464	1.18244	1.30737	0.608791	0.644283	0.674528
hsa05143 African trypanosomiasis	0.363003	2	1.6	P05771	504	0.692	Down	0.00020151	T	Protein kinase C beta type OS=Homo sapiens OX=9606 GN=PRKCB PE=1 SV=4	PRKCB	0.80982	4.41108e-11	148.75	T(0.19)FCGT(0.81)PDYIAPEIIAYQPYGK	3	0.69537	2	1.18248	1.20488	1.13603	0.825275	0.834846	0.776415
hsa04750 Inflammatory mediator regulation of TRP channels	0.0613072	8	1.79	P17252	497	0.556	Down	0.0033406	T	Protein kinase C alpha type OS=Homo sapiens OX=9606 GN=PRKCA PE=1 SV=4	PRKCA	0.995374	1.9459e-81	290.44	T(0.995)FCGT(0.005)PDYIAPEIIAYQPYGK	4	-0.46556	5	1.39259	1.15755	1.19528	0.594895	0.754116	0.734164
hsa04750 Inflammatory mediator regulation of TRP channels	0.0613072	8	1.79	Q04759	538	0.682	Down	0.0054007	T	Protein kinase C theta type OS=Homo sapiens OX=9606 GN=PRKCQ PE=1 SV=3	PRKCQ	0.758097	1.56803e-16	173.32	T(0.236)NT(0.758)FCGT(0.006)PDYIAPEILLGQK	4	-0.56803	2	1.29281	1.13714	1.15307	0.729626	0.887195	0.826693
hsa04750 Inflammatory mediator regulation of TRP channels	0.0613072	8	1.79	Q04759	542	0.664	Down	0.0046812	T	Protein kinase C theta type OS=Homo sapiens OX=9606 GN=PRKCQ PE=1 SV=3	PRKCQ	0.800787	1.43662e-16	174.28	T(0.022)NT(0.178)FCGT(0.801)PDYIAPEILLGQK	2	-1.3442	1	1.3129	1.17718	1.12487	0.753595	0.756098	0.891434
hsa04750 Inflammatory mediator regulation of TRP channels	0.0613072	8	1.79	Q14643	1598	0.703	Down	0.036478	S	Inositol 1,4,5-trisphosphate receptor type 1 OS=Homo sapiens OX=9606 GN=ITPR1 PE=1 SV=3	ITPR1	1	0.000592839	104.7	RDS(1)VLAASR	2	-0.66094	2	1.01439	1.22483	1.2934	0.927152	0.863774	0.692376
hsa04750 Inflammatory mediator regulation of TRP channels	0.0613072	8	1.79	P62136	325	0.751	Down	0.0053385	S	Serine/threonine-protein phosphatase PP1-alpha catalytic subunit OS=Homo sapiens OX=9606 GN=PPP1CA PE=1 SV=1	PPP1CA	0.992523	0.0125529	46.068	PIT(0.007)PPRNS(0.993)AK	3	-0.90431	1	1.18208	1.07692	1.17159	0.789474	0.873474	0.91309
hsa04750 Inflammatory mediator regulation of TRP channels	0.0613072	8	1.79	Q13555	381	0.796	Down	0.0101985	S	Calcium/calmodulin-dependent protein kinase type II subunit gamma OS=Homo sapiens OX=9606 GN=CAMK2G PE=1 SV=4	CAMK2G	0.973501	6.26352e-13	153.36	GS(0.974)T(0.026)ESCNTTTEDEDLK	3	0.16272	1	1.07271	1.04295	1.16169	0.933747	0.821096	0.855057
hsa04750 Inflammatory mediator regulation of TRP channels	0.0613072	8	1.79	P17612	198	0.632	Down	0.000102671	T	cAMP-dependent protein kinase catalytic subunit alpha OS=Homo sapiens OX=9606 GN=PRKACA PE=1 SV=2	PRKACA	0.985721	1.71589e-53	251.29	T(0.009)WT(0.986)LCGT(0.005)PEYLAPEIILSK	2	0.23372	4	1.2387	1.16367	1.20218	0.758099	0.729104	0.791845
hsa04750 Inflammatory mediator regulation of TRP channels	0.0613072	8	1.79	Q05655	664	0.731	Down	0.00054074	S	Protein kinase C delta type OS=Homo sapiens OX=9606 GN=PRKCD PE=1 SV=2	PRKCD	0.999989	1.90749e-07	125.39	NLIDSMDQSAFAGFS(1)FVNPK	3	-0.57978	2	1.19849	1.2	1.14664	0.910433	0.849693	0.831933
hsa04750 Inflammatory mediator regulation of TRP channels	0.0613072	8	1.79	Q05655	507	0.78	Down	0.009376	T	Protein kinase C delta type OS=Homo sapiens OX=9606 GN=PRKCD PE=1 SV=2	PRKCD	0.997669	2.44866e-81	296.17	AS(0.002)T(0.998)FCGTPDYIAPEILQGLK	2	0.5926	3	1.14563	1.12323	1.18432	0.991142	0.860941	0.841387
hsa04750 Inflammatory mediator regulation of TRP channels	0.0613072	8	1.79	P05771	500	0.478	Down	0.00093695	T	Protein kinase C beta type OS=Homo sapiens OX=9606 GN=PRKCB PE=1 SV=4	PRKCB	0.995374	1.9459e-81	290.44	T(0.995)FCGT(0.005)PDYIAPEIIAYQPYGK	4	-0.46556	6	1.5464	1.18244	1.30737	0.608791	0.644283	0.674528
hsa04750 Inflammatory mediator regulation of TRP channels	0.0613072	8	1.79	P05771	504	0.692	Down	0.00020151	T	Protein kinase C beta type OS=Homo sapiens OX=9606 GN=PRKCB PE=1 SV=4	PRKCB	0.80982	4.41108e-11	148.75	T(0.19)FCGT(0.81)PDYIAPEIIAYQPYGK	3	0.69537	2	1.18248	1.20488	1.13603	0.825275	0.834846	0.776415
hsa05220 Chronic myeloid leukemia	0.764063	4	0.8	Q01196	21	0.817	Down	0.020516	S	Runt-related transcription factor 1 OS=Homo sapiens OX=9606 GN=RUNX1 PE=1 SV=3	RUNX1	0.999927	1.7118e-13	155.09	FTPPSTALS(1)PGK	3	-0.3697	14	1.16109	1.16073	1.01125	0.879639	0.884615	0.959711
hsa05220 Chronic myeloid leukemia	0.764063	4	0.8	P36507	306	0.695	Down	0.0148639	S	Dual specificity mitogen-activated protein kinase kinase 2 OS=Homo sapiens OX=9606 GN=MAP2K2 PE=1 SV=1	MAP2K2	0.999855	0.0114831	47.75	PRPPGRPVS(1)GHGMDSR	4	-1.4169	2	1.32853	1.15015	1.03137	0.736426	0.838773	0.863281
hsa05220 Chronic myeloid leukemia	0.764063	4	0.8	P06400	866	0.604	Down	0.00020446	S	Retinoblastoma-associated protein OS=Homo sapiens OX=9606 GN=RB1 PE=1 SV=2	RB1	0.999535	0.000334169	75.018	SAEGS(1)NPPKPLKK	3	0.67716	1	1.2809	1.23275	1.22143	0.750996	0.799603	0.704825
hsa05220 Chronic myeloid leukemia	0.764063	4	0.8	P06400	606	0.82	Down	0.0024033	Y	Retinoblastoma-associated protein OS=Homo sapiens OX=9606 GN=RB1 PE=1 SV=2	RB1	0.758945	9.41717e-06	73.227	EGPTDHLESACPLNLPLQNNHT(0.441)AADMY(0.759)LS(0.787)PVRS(0.012)PK	3	0.89538	3	1.12666	1.06797	1.10714	0.860558	0.935516	0.910123
hsa05220 Chronic myeloid leukemia	0.764063	4	0.8	P29353	139	0.543	Down	0.00030018	S	SHC-transforming protein 1 OS=Homo sapiens OX=9606 GN=SHC1 PE=1 SV=4	SHC1	0.999993	0.00167172	64.224	HGS(1)FVNKPTR	4	-0.306	1	1.32089	1.16622	1.29894	0.686165	0.644664	0.725825
hsa04620 Toll-like receptor signaling pathway	0.957634	1	0.35	P36507	306	0.695	Down	0.0148639	S	Dual specificity mitogen-activated protein kinase kinase 2 OS=Homo sapiens OX=9606 GN=MAP2K2 PE=1 SV=1	MAP2K2	0.999855	0.0114831	47.75	PRPPGRPVS(1)GHGMDSR	4	-1.4169	2	1.32853	1.15015	1.03137	0.736426	0.838773	0.863281
hsa04136 Autophagy - other	0.555962	2	1.12	P42345	2448	0.83	Down	0.0090564	S	Serine/threonine-protein kinase mTOR OS=Homo sapiens OX=9606 GN=MTOR PE=1 SV=1	MTOR	0.805907	4.74526e-23	180.79	T(0.173)DS(0.806)YS(0.021)AGQSVEILDGVELGEPAHK	3	0.87519	2	1.11547	1.11778	1.04615	0.858614	0.962049	0.900875
hsa04136 Autophagy - other	0.555962	2	1.12	Q8N122	877	0.77	Down	0.0080602	S	Regulatory-associated protein of mTOR OS=Homo sapiens OX=9606 GN=RPTOR PE=1 SV=1	RPTOR	0.991807	1.1764e-12	133.79	GVHIHQAGGS(0.992)PPASST(0.006)S(0.001)SSSLTNDVAK	4	-0.38196	1	1.10798	1.13482	1.15495	0.784753	0.930091	0.902978
hsa03040 Spliceosome	0.000827038	24	1.87	P07910	156	0.594	Down	0.0029018	S	Heterogeneous nuclear ribonucleoproteins C1/C2 OS=Homo sapiens OX=9606 GN=HNRNPC PE=1 SV=4	HNRNPC	1	0.0261994	46.129	AVVPS(1)KR	3	0.48939	1	1.18357	1.2495	1.26619	0.658883	0.687992	0.849609
hsa03040 Spliceosome	0.000827038	24	1.87	P09651	95	0.366	Down	2.8558e-06	S	Heterogeneous nuclear ribonucleoprotein A1 OS=Homo sapiens OX=9606 GN=HNRNPA1 PE=1 SV=5	HNRNPA1	0.999995	0.000350589	76.378	EDS(1)QRPGAHLTVK	3	-0.34277	3	1.39623	1.39113	1.45168	0.54709	0.502028	0.502964
hsa03040 Spliceosome	0.000827038	24	1.87	P09651	368	0.397	Down	4.2799e-05	S	Heterogeneous nuclear ribonucleoprotein A1 OS=Homo sapiens OX=9606 GN=HNRNPA1 PE=1 SV=5	HNRNPA1	0.999999	1.80618e-41	222.07	NQGGYGGSSSSSSYGS(1)GR	2	-0.22864	4	1.4434	1.41281	1.29586	0.589418	0.526369	0.532609
hsa03040 Spliceosome	0.000827038	24	1.87	P09651	192	0.328	Down	0.000103067	S	Heterogeneous nuclear ribonucleoprotein A1 OS=Homo sapiens OX=9606 GN=HNRNPA1 PE=1 SV=5	HNRNPA1	0.895528	0.000447483	78.615	QEMAS(0.001)AS(0.023)S(0.081)S(0.896)QR	2	-0.70587	1	1.2934	1.5202	1.5217	0.42963	0.493915	0.5
hsa03040 Spliceosome	0.000827038	24	1.87	Q01130	101	0.478	Down	0.0003621	S	Serine/arginine-rich splicing factor 2 OS=Homo sapiens OX=9606 GN=SRSF2 PE=1 SV=4	SRSF2	0.994725	1.32114e-05	94.09	YGRPPDS(0.005)HHS(0.995)R	3	-0.52709	3	1.40344	1.42129	1.29837	0.58202	0.68579	0.704977
hsa03040 Spliceosome	0.000827038	24	1.87	Q8NI27	1364	0.828	Down	0.0037552	S	THO complex subunit 2 OS=Homo sapiens OX=9606 GN=THOC2 PE=1 SV=2	THOC2	1	0.00996148	65.842	EKEPS(1)RER	4	-0.27856	2	1.09681	1.07249	1.1144	0.855236	0.925852	0.939275
hsa03040 Spliceosome	0.000827038	24	1.87	P38159	315	0.813	Down	0.027776	S	RNA-binding motif protein, X chromosome OS=Homo sapiens OX=9606 GN=RBMX PE=1 SV=3	RBMX	0.978342	0.000948757	92.538	YDDYS(0.019)S(0.978)S(0.003)R	2	-1.5943	2	1.00282	1.15332	1.11277	0.939919	0.907631	0.8107
hsa03040 Spliceosome	0.000827038	24	1.87	P38159	201	0.632	Down	0.00116387	S	RNA-binding motif protein, X chromosome OS=Homo sapiens OX=9606 GN=RBMX PE=1 SV=3	RBMX	1	0.00192898	68.355	REPLPS(1)RR	3	-0.53299	2	1.2646	1.15332	1.18663	0.699593	0.827309	0.751029
hsa03040 Spliceosome	0.000827038	24	1.87	P38159	307	0.697	Down	0.0024577	S	RNA-binding motif protein, X chromosome OS=Homo sapiens OX=9606 GN=RBMX PE=1 SV=3	RBMX	0.947762	0.000539633	76.357	GPPPS(0.001)YGGS(0.948)S(0.051)R	2	0.31453	1	1.06026	1.15039	1.26747	0.813646	0.790161	0.819959
hsa03040 Spliceosome	0.000827038	24	1.87	P38159	175	0.77	Down	0.00197986	S	RNA-binding motif protein, X chromosome OS=Homo sapiens OX=9606 GN=RBMX PE=1 SV=3	RBMX	0.984246	0.000523579	101.97	SS(0.015)S(0.984)GMGGR	2	-0.064705	1	1.06874	1.11914	1.15669	0.906314	0.845382	0.825103
hsa03040 Spliceosome	0.000827038	24	1.87	P38159	91	0.742	Down	0.0120642	S	RNA-binding motif protein, X chromosome OS=Homo sapiens OX=9606 GN=RBMX PE=1 SV=3	RBMX	0.988485	0.0133247	45.221	VEQAT(0.002)KPS(0.01)FES(0.988)GRR	3	0.63148	2	1.05744	1.09082	1.2485	0.885947	0.766064	0.868313
hsa03040 Spliceosome	0.000827038	24	1.87	Q8IWX8	902	0.703	Down	0.00033542	S	Calcium homeostasis endoplasmic reticulum protein OS=Homo sapiens OX=9606 GN=CHERP PE=1 SV=3	CHERP	0.992293	0.00273201	64.121	NKS(0.992)Y(0.001)S(0.007)FIAR	3	0.17875	1	1.20248	1.16766	1.12705	0.811853	0.789109	0.857567
hsa03040 Spliceosome	0.000827038	24	1.87	Q8IWX8	904	0.555	Down	0.0011371	S	Calcium homeostasis endoplasmic reticulum protein OS=Homo sapiens OX=9606 GN=CHERP PE=1 SV=3	CHERP	0.841566	0.00484752	71.451	S(0.158)YS(0.842)FIAR	2	0.12717	2	1.39463	1.19444	1.24283	0.654751	0.783168	0.687438
hsa03040 Spliceosome	0.000827038	24	1.87	P51991	350	0.455	Down	1.62954e-05	S	Heterogeneous nuclear ribonucleoprotein A3 OS=Homo sapiens OX=9606 GN=HNRNPA3 PE=1 SV=2	HNRNPA3	1	0.00939041	62.582	GGS(1)FGGR	2	-1.5558	2	1.26239	1.38752	1.30531	0.586061	0.604055	0.608974
hsa03040 Spliceosome	0.000827038	24	1.87	P51991	375	0.405	Down	0.0023611	S	Heterogeneous nuclear ribonucleoprotein A3 OS=Homo sapiens OX=9606 GN=HNRNPA3 PE=1 SV=2	HNRNPA3	1	1.42947e-41	231.72	SSGSPYGGGYGSGGGSGGYGS(1)R	2	-2.0191	2	1.40734	1.41588	1.24734	0.466737	0.485592	0.696581
hsa03040 Spliceosome	0.000827038	24	1.87	P51991	366	0.687	Down	0.0065575	S	Heterogeneous nuclear ribonucleoprotein A3 OS=Homo sapiens OX=9606 GN=HNRNPA3 PE=1 SV=2	HNRNPA3	0.942357	8.45109e-11	139.63	SSGSPYGGGYGS(0.942)GGGS(0.058)GGYGSR	2	0.71401	1	1.17523	1.26843	1.02995	0.739176	0.807898	0.840812
hsa03040 Spliceosome	0.000827038	24	1.87	Q09161	22	0.651	Down	4.3372e-07	S	Nuclear cap-binding protein subunit 1 OS=Homo sapiens OX=9606 GN=NCBP1 PE=1 SV=1	NCBP1	0.976199	1.54841e-76	288.64	T(0.024)S(0.976)DANETEDHLESLICK	3	1.0936	4	1.21824	1.20464	1.19598	0.794479	0.786065	0.777027
hsa03040 Spliceosome	0.000827038	24	1.87	Q09161	7	0.775	Down	0.00115592	S	Nuclear cap-binding protein subunit 1 OS=Homo sapiens OX=9606 GN=NCBP1 PE=1 SV=1	NCBP1	1	3.41289e-11	135.08	RRHS(1)DENDGGQPHK	3	-0.75277	7	1.17213	1.10685	1.09648	0.833333	0.894014	0.888996
hsa03040 Spliceosome	0.000827038	24	1.87	Q09161	674	0.763	Down	0.00089942	S	Nuclear cap-binding protein subunit 1 OS=Homo sapiens OX=9606 GN=NCBP1 PE=1 SV=1	NCBP1	1	4.73535e-05	115.34	RRS(1)DDDDR	3	-0.53646	21	1.09529	1.14919	1.15477	0.893661	0.877331	0.821429
hsa03040 Spliceosome	0.000827038	24	1.87	Q9UKV3	240	0.712	Down	0.00141736	S	Apoptotic chromatin condensation inducer in the nucleus OS=Homo sapiens OX=9606 GN=ACIN1 PE=1 SV=2	ACIN1	1	1.02368e-05	96.068	AAKLS(1)EGS(1)QPAEEEEDQETPSR	3	-1.5256	1	1.18047	1.15891	1.12683	0.756345	0.858193	0.853524
hsa03040 Spliceosome	0.000827038	24	1.87	Q9UKV3	243	0.712	Down	0.00141736	S	Apoptotic chromatin condensation inducer in the nucleus OS=Homo sapiens OX=9606 GN=ACIN1 PE=1 SV=2	ACIN1	1	1.02368e-05	96.068	AAKLS(1)EGS(1)QPAEEEEDQETPSR	3	-1.5256	1	1.18047	1.15891	1.12683	0.756345	0.858193	0.853524
hsa03040 Spliceosome	0.000827038	24	1.87	Q9UKV3	838	0.805	Down	0.0185785	S	Apoptotic chromatin condensation inducer in the nucleus OS=Homo sapiens OX=9606 GN=ACIN1 PE=1 SV=2	ACIN1	0.989305	8.04972e-16	166.34	GVPAGNS(0.989)DT(0.011)EGGQPGR	3	-0.17055	7	1.02791	1.13469	1.14244	0.808122	0.934874	0.9163
hsa03040 Spliceosome	0.000827038	24	1.87	O43290	348	0.697	Down	0.0066233	S	U4/U6.U5 tri-snRNP-associated protein 1 OS=Homo sapiens OX=9606 GN=SART1 PE=1 SV=1	SART1	1	0.000470319	74.793	YDEELEGERPHS(1)FR	3	0.12883	3	1.04069	1.28054	1.20933	0.863817	0.821974	0.776482
hsa03040 Spliceosome	0.000827038	24	1.87	O43290	738	0.363	Down	0.0064428	S	U4/U6.U5 tri-snRNP-associated protein 1 OS=Homo sapiens OX=9606 GN=SART1 PE=1 SV=1	SART1	1	0.00304152	63.624	FHGKGS(1)GK	4	0.036257	1	1.48627	1.51035	1.35813	0.34493	0.662258	0.575316
hsa03040 Spliceosome	0.000827038	24	1.87	Q92620	249	0.536	Down	0.00031871	S	Pre-mRNA-splicing factor ATP-dependent RNA helicase PRP16 OS=Homo sapiens OX=9606 GN=DHX38 PE=1 SV=2	DHX38	0.914027	0.0190151	44.863	S(0.034)HRLS(0.914)T(0.052)R	3	-0.18104	1	1.42809	1.29933	1.19214	0.684008	0.709466	0.709247
hsa03040 Spliceosome	0.000827038	24	1.87	P17844	498	0.579	Down	0.00102214	S	Probable ATP-dependent RNA helicase DDX5 OS=Homo sapiens OX=9606 GN=DDX5 PE=1 SV=1	DDX5	0.8748	0.0179695	46.001	DRY(0.125)S(0.875)AGK	3	-0.46458	1	1.39861	1.14047	1.21514	0.729949	0.698574	0.746798
hsa03040 Spliceosome	0.000827038	24	1.87	P17844	480	0.421	Down	2.2914e-05	S	Probable ATP-dependent RNA helicase DDX5 OS=Homo sapiens OX=9606 GN=DDX5 PE=1 SV=1	DDX5	1	2.84645e-10	147.64	LLQLVEDRGS(1)GR	3	-0.46499	2	1.30219	1.36739	1.45717	0.559391	0.60387	0.575369
hsa03040 Spliceosome	0.000827038	24	1.87	P17844	520	0.407	Down	6.8311e-07	S	Probable ATP-dependent RNA helicase DDX5 OS=Homo sapiens OX=9606 GN=DDX5 PE=1 SV=1	DDX5	0.907931	0.000584716	107.57	GYS(0.092)S(0.908)LLK	2	-0.11691	3	1.42445	1.39882	1.34462	0.554315	0.571283	0.570443
hsa03040 Spliceosome	0.000827038	24	1.87	Q15459	508	0.647	Down	0.00151587	S	Splicing factor 3A subunit 1 OS=Homo sapiens OX=9606 GN=SF3A1 PE=1 SV=1	SF3A1	0.979329	5.48737e-08	126.16	VTWDGHS(0.021)GS(0.979)MAR	2	-1.1431	2	1.22994	1.16667	1.20194	0.733401	0.863309	0.732478
hsa03040 Spliceosome	0.000827038	24	1.87	Q16629	123	0.719	Down	0.00051981	S	Serine/arginine-rich splicing factor 7 OS=Homo sapiens OX=9606 GN=SRSF7 PE=1 SV=1	SRSF7	1	1.04058e-05	98.582	GHYAYDCHRYS(1)R	3	0.4011	2	1.1751	1.15258	1.14358	0.786744	0.877049	0.832517
hsa03040 Spliceosome	0.000827038	24	1.87	Q13435	346	0.786	Down	0.0101173	S	Splicing factor 3B subunit 2 OS=Homo sapiens OX=9606 GN=SF3B2 PE=1 SV=2	SF3B2	0.96298	0.000122671	87.647	GVS(0.323)S(0.678)ES(0.963)S(0.036)GDREK	2	-0.13914	4	1.13014	1.13992	1.05517	0.802254	0.943396	0.868395
hsa03040 Spliceosome	0.000827038	24	1.87	O15042	934	0.737	Down	0.0035177	S	U2 snRNP-associated SURP motif-containing protein OS=Homo sapiens OX=9606 GN=U2SURP PE=1 SV=2	U2SURP	0.834949	0.00129683	65.207	RHS(0.973)T(0.621)S(0.564)PS(0.835)PS(0.223)RS(0.603)S(0.145)S(0.037)GR	3	0.055655	1	1.10143	1.16632	1.18887	0.787565	0.841285	0.917485
hsa03040 Spliceosome	0.000827038	24	1.87	O15042	919	0.77	Down	0.0036389	T	U2 snRNP-associated SURP motif-containing protein OS=Homo sapiens OX=9606 GN=U2SURP PE=1 SV=2	U2SURP	0.940118	0.0163907	47.352	EKDECT(0.94)PT(0.06)RK	4	-0.17041	3	1.16803	1.1848	1.04672	0.853886	0.901655	0.862475
hsa03040 Spliceosome	0.000827038	24	1.87	O15042	930	0.737	Down	0.0035177	S	U2 snRNP-associated SURP motif-containing protein OS=Homo sapiens OX=9606 GN=U2SURP PE=1 SV=2	U2SURP	0.973419	0.00129683	65.207	RHS(0.973)T(0.621)S(0.564)PS(0.835)PS(0.223)RS(0.603)S(0.145)S(0.037)GR	3	0.055655	1	1.10143	1.16632	1.18887	0.787565	0.841285	0.917485
hsa03040 Spliceosome	0.000827038	24	1.87	O15042	921	0.705	Down	0.0065406	T	U2 snRNP-associated SURP motif-containing protein OS=Homo sapiens OX=9606 GN=U2SURP PE=1 SV=2	U2SURP	0.885509	0.00203047	73.927	EKDECT(0.114)PT(0.886)R	2	-0.8441	1	1.30225	1.12423	1.11133	0.899482	0.819864	0.774067
hsa03040 Spliceosome	0.000827038	24	1.87	O60306	16	0.6	Down	0.00076262	S	RNA helicase aquarius OS=Homo sapiens OX=9606 GN=AQR PE=1 SV=4	AQR	0.981003	4.62362e-11	148.09	IVAPT(0.019)VS(0.981)QINAEFVTQLACK	4	2.0869	2	1.2472	1.26121	1.16667	0.707865	0.687747	0.80887
hsa03040 Spliceosome	0.000827038	24	1.87	Q7L014	774	0.465	Down	0.0004788	S	Probable ATP-dependent RNA helicase DDX46 OS=Homo sapiens OX=9606 GN=DDX46 PE=1 SV=2	DDX46	0.999689	0.010139	61.78	SSGFS(1)GK	2	-1.1165	1	1.46612	1.19345	1.412	0.656442	0.650295	0.585
hsa03040 Spliceosome	0.000827038	24	1.87	P52272	528	0.676	Down	0.0095385	S	Heterogeneous nuclear ribonucleoprotein M OS=Homo sapiens OX=9606 GN=HNRNPM PE=1 SV=3	HNRNPM	1	0.0216702	49.418	MGLS(1)MER	2	-0.50219	2	1.03586	1.16148	1.35206	0.844335	0.793555	0.760913
hsa03040 Spliceosome	0.000827038	24	1.87	Q86XP3	816	0.366	Down	6.3048e-05	S	ATP-dependent RNA helicase DDX42 OS=Homo sapiens OX=9606 GN=DDX42 PE=1 SV=1	DDX42	0.965756	0.000556148	101.72	YTENRGS(0.966)S(0.034)R	2	-0.41387	1	1.38284	1.56313	1.29487	0.535607	0.5125	0.50404
hsa03040 Spliceosome	0.000827038	24	1.87	Q9BUQ8	109	0.833	Down	0.0149048	S	Probable ATP-dependent RNA helicase DDX23 OS=Homo sapiens OX=9606 GN=DDX23 PE=1 SV=3	DDX23	0.999983	0.00308875	85.716	S(0.368)S(0.633)LS(1)PGR	2	0.29351	8	1.04183	1.15314	1.05918	0.865404	0.960357	0.885542
hsa03040 Spliceosome	0.000827038	24	1.87	Q9BUQ8	23	0.736	Down	0.0089432	S	Probable ATP-dependent RNA helicase DDX23 OS=Homo sapiens OX=9606 GN=DDX23 PE=1 SV=3	DDX23	1	0.0402311	61.11	S(1)RT(1)PDRER	2	0.092861	2	1.16829	1.12475	1.1344	0.73679	0.890981	0.895582
hsa03040 Spliceosome	0.000827038	24	1.87	Q9BUQ8	107	0.816	Down	0.014339	S	Probable ATP-dependent RNA helicase DDX23 OS=Homo sapiens OX=9606 GN=DDX23 PE=1 SV=3	DDX23	0.822476	0.00308875	85.716	KRS(0.179)S(0.822)LS(0.998)PGR	3	-0.29071	6	1.03891	1.16531	1.08124	0.871386	0.957384	0.851406
hsa03040 Spliceosome	0.000827038	24	1.87	P49756	683	0.613	Down	0.0112411	S	RNA-binding protein 25 OS=Homo sapiens OX=9606 GN=RBM25 PE=1 SV=3	RBM25	0.999976	0.000869257	73.138	LGASNSPGQPNS(1)VKR	3	-0.17775	2	1.22333	1.1607	1.32992	0.909538	0.732724	0.633843
hsa03040 Spliceosome	0.000827038	24	1.87	O43143	15	0.556	Down	0.0046642	S	Pre-mRNA-splicing factor ATP-dependent RNA helicase DHX15 OS=Homo sapiens OX=9606 GN=DHX15 PE=1 SV=2	DHX15	0.999527	0.00128483	66.246	LDLGEDYPS(1)GK	2	0.31552	2	1.21047	1.20121	1.40729	0.690265	0.607035	0.827828
hsa03040 Spliceosome	0.000827038	24	1.87	P62995	81	0.721	Down	0.0033788	S	Transformer-2 protein homolog beta OS=Homo sapiens OX=9606 GN=TRA2B PE=1 SV=1	TRA2B	0.997029	0.00796422	55.291	S(0.997)RS(0.944)RS(0.918)Y(0.024)S(0.118)R	2	-0.24545	1	1.18447	1.18831	1.08652	0.853945	0.761673	0.878879
hsa03040 Spliceosome	0.000827038	24	1.87	P62995	85	0.721	Down	0.0033788	S	Transformer-2 protein homolog beta OS=Homo sapiens OX=9606 GN=TRA2B PE=1 SV=1	TRA2B	0.917755	0.00796422	55.291	S(0.997)RS(0.944)RS(0.918)Y(0.024)S(0.118)R	2	-0.24545	1	1.18447	1.18831	1.08652	0.853945	0.761673	0.878879
hsa03040 Spliceosome	0.000827038	24	1.87	P62995	83	0.721	Down	0.0033788	S	Transformer-2 protein homolog beta OS=Homo sapiens OX=9606 GN=TRA2B PE=1 SV=1	TRA2B	0.943799	0.00796422	55.291	S(0.997)RS(0.944)RS(0.918)Y(0.024)S(0.118)R	2	-0.24545	1	1.18447	1.18831	1.08652	0.853945	0.761673	0.878879
hsa03040 Spliceosome	0.000827038	24	1.87	P62995	216	0.806	Down	0.0083242	S	Transformer-2 protein homolog beta OS=Homo sapiens OX=9606 GN=TRA2B PE=1 SV=1	TRA2B	0.8757	0.00480881	71.708	PTYGS(0.124)S(0.876)R	2	0.11881	2	1.1068	1.08424	1.12072	0.943497	0.816148	0.910911
hsa03020 RNA polymerase	0.0109831	4	3.74	O95602	1489	0.702	Down	0.0155204	S	DNA-directed RNA polymerase I subunit RPA1 OS=Homo sapiens OX=9606 GN=POLR1A PE=1 SV=2	POLR1A	0.935033	0.000792181	72.316	KPT(0.065)HS(0.935)QEPQGPEAMER	3	-0.47856	1	1.14271	1.17113	1.20747	0.910058	0.874239	0.68684
hsa03020 RNA polymerase	0.0109831	4	3.74	Q9GZS1	163	0.416	Down	0.00052288	S	DNA-directed RNA polymerase I subunit RPA49 OS=Homo sapiens OX=9606 GN=POLR1E PE=1 SV=3	POLR1E	1	0.00750675	61.344	VGNES(1)LNR	2	0.45517	1	1.56836	1.32271	1.38453	0.652066	0.515752	0.610647
hsa03020 RNA polymerase	0.0109831	4	3.74	P24928	1864	0.716	Down	0.0028244	S	DNA-directed RNA polymerase II subunit RPB1 OS=Homo sapiens OX=9606 GN=POLR2A PE=1 SV=2	POLR2A	0.980299	0.00182902	93.649	YSPT(0.02)S(0.98)PK	2	0.48647	3	1.08535	1.16373	1.23487	0.789581	0.81587	0.887984
hsa03020 RNA polymerase	0.0109831	4	3.74	P24928	1850	0.76	Down	0.029195	S	DNA-directed RNA polymerase II subunit RPB1 OS=Homo sapiens OX=9606 GN=POLR2A PE=1 SV=2	POLR2A	0.944393	1.26171e-05	99.11	YTPTSPSYS(0.007)PS(0.045)S(0.944)PEY(0.002)T(0.001)PTSPK	4	-0.8108	2	1.19011	1.05	1.1641	0.768131	0.832146	0.98778
hsa03020 RNA polymerase	0.0109831	4	3.74	P24928	1878	0.675	Down	0.00025761	S	DNA-directed RNA polymerase II subunit RPB1 OS=Homo sapiens OX=9606 GN=POLR2A PE=1 SV=2	POLR2A	0.97425	4.54715e-16	164.93	YSPT(0.022)S(0.974)PT(0.003)YSPTTPK	2	-0.28581	1	1.24345	1.18039	1.14051	0.830439	0.775178	0.801426
hsa03020 RNA polymerase	0.0109831	4	3.74	P24928	1920	0.71	Down	0.00130364	S	DNA-directed RNA polymerase II subunit RPB1 OS=Homo sapiens OX=9606 GN=POLR2A PE=1 SV=2	POLR2A	0.911701	1.14232e-11	150.61	YSPT(0.005)S(0.989)PT(0.011)YS(0.03)PT(0.053)S(0.912)PK	2	-0.32036	1	1.11542	1.14804	1.23282	0.80286	0.80061	0.878819
hsa03020 RNA polymerase	0.0109831	4	3.74	P24928	1913	0.71	Down	0.00130364	S	DNA-directed RNA polymerase II subunit RPB1 OS=Homo sapiens OX=9606 GN=POLR2A PE=1 SV=2	POLR2A	0.988711	1.14232e-11	150.61	YSPT(0.005)S(0.989)PT(0.011)YS(0.03)PT(0.053)S(0.912)PK	2	-0.32036	1	1.11542	1.14804	1.23282	0.80286	0.80061	0.878819
hsa03020 RNA polymerase	0.0109831	4	3.74	Q3B726	316	0.684	Down	0.00190355	S	DNA-directed RNA polymerase I subunit RPA43 OS=Homo sapiens OX=9606 GN=TWISTNB PE=1 SV=1	TWISTNB	0.964606	0.000328577	72.433	KHS(0.965)EEAEFT(0.035)PPLK	4	0.16166	2	1.23177	1.10657	1.19057	0.807692	0.745846	0.861446
hsa04114 Oocyte meiosis	0.410296	9	1.12	Q14643	1598	0.703	Down	0.036478	S	Inositol 1,4,5-trisphosphate receptor type 1 OS=Homo sapiens OX=9606 GN=ITPR1 PE=1 SV=3	ITPR1	1	0.000592839	104.7	RDS(1)VLAASR	2	-0.66094	2	1.01439	1.22483	1.2934	0.927152	0.863774	0.692376
hsa04114 Oocyte meiosis	0.410296	9	1.12	Q13555	381	0.796	Down	0.0101985	S	Calcium/calmodulin-dependent protein kinase type II subunit gamma OS=Homo sapiens OX=9606 GN=CAMK2G PE=1 SV=4	CAMK2G	0.973501	6.26352e-13	153.36	GS(0.974)T(0.026)ESCNTTTEDEDLK	3	0.16272	1	1.07271	1.04295	1.16169	0.933747	0.821096	0.855057
hsa04114 Oocyte meiosis	0.410296	9	1.12	P62136	325	0.751	Down	0.0053385	S	Serine/threonine-protein phosphatase PP1-alpha catalytic subunit OS=Homo sapiens OX=9606 GN=PPP1CA PE=1 SV=1	PPP1CA	0.992523	0.0125529	46.068	PIT(0.007)PPRNS(0.993)AK	3	-0.90431	1	1.18208	1.07692	1.17159	0.789474	0.873474	0.91309
hsa04114 Oocyte meiosis	0.410296	9	1.12	P06493	14	0.735	Down	0.000160332	T	Cyclin-dependent kinase 1 OS=Homo sapiens OX=9606 GN=CDK1 PE=1 SV=3	CDK1	1	5.11318e-07	123.95	IGEGT(1)Y(1)GVVYK	3	-0.064899	8	1.16701	1.16599	1.14039	0.878818	0.855556	0.817561
hsa04114 Oocyte meiosis	0.410296	9	1.12	Q14738	88	0.694	Down	0.00067513	S	Serine/threonine-protein phosphatase 2A 56 kDa regulatory subunit delta isoform OS=Homo sapiens OX=9606 GN=PPP2R5D PE=1 SV=1	PPP2R5D	0.996716	0.00441329	58.814	RQS(0.997)S(0.957)S(0.046)RFNLSK	3	-0.10795	3	1.23077	1.1945	1.10679	0.795367	0.80286	0.851889
hsa04114 Oocyte meiosis	0.410296	9	1.12	Q14738	90	0.602	Down	0.00072093	S	Serine/threonine-protein phosphatase 2A 56 kDa regulatory subunit delta isoform OS=Homo sapiens OX=9606 GN=PPP2R5D PE=1 SV=1	PPP2R5D	0.963246	0.00441329	58.814	RQS(0.518)S(0.518)S(0.963)RFNLSK	4	-0.099014	2	1.34312	1.20978	1.17764	0.702703	0.796731	0.747515
hsa04114 Oocyte meiosis	0.410296	9	1.12	Q14738	89	0.694	Down	0.00067513	S	Serine/threonine-protein phosphatase 2A 56 kDa regulatory subunit delta isoform OS=Homo sapiens OX=9606 GN=PPP2R5D PE=1 SV=1	PPP2R5D	0.956727	0.00441329	58.814	RQS(0.997)S(0.957)S(0.046)RFNLSK	3	-0.10795	3	1.23077	1.1945	1.10679	0.795367	0.80286	0.851889
hsa04114 Oocyte meiosis	0.410296	9	1.12	P17612	198	0.632	Down	0.000102671	T	cAMP-dependent protein kinase catalytic subunit alpha OS=Homo sapiens OX=9606 GN=PRKACA PE=1 SV=2	PRKACA	0.985721	1.71589e-53	251.29	T(0.009)WT(0.986)LCGT(0.005)PEYLAPEIILSK	2	0.23372	4	1.2387	1.16367	1.20218	0.758099	0.729104	0.791845
hsa04114 Oocyte meiosis	0.410296	9	1.12	Q15418	380	0.696	Down	0.00074009	S	Ribosomal protein S6 kinase alpha-1 OS=Homo sapiens OX=9606 GN=RPS6KA1 PE=1 SV=2	RPS6KA1	0.999998	5.09031e-41	218.72	GFS(1)FVATGLMEDDGKPR	4	-0.81995	2	1.10449	1.20962	1.11933	0.754974	0.811361	0.822917
hsa04114 Oocyte meiosis	0.410296	9	1.12	Q14674	1501	0.82	Down	0.049916	S	Separin OS=Homo sapiens OX=9606 GN=ESPL1 PE=1 SV=3	ESPL1	1	0.00261763	74.698	KMS(1)FEILR	3	-1.0667	2	1.09218	1.23086	0.990593	0.848598	0.935423	0.932485
hsa04114 Oocyte meiosis	0.410296	9	1.12	Q13362	497	0.73	Down	0.0088423	S	Serine/threonine-protein phosphatase 2A 56 kDa regulatory subunit gamma isoform OS=Homo sapiens OX=9606 GN=PPP2R5C PE=1 SV=3	PPP2R5C	0.999998	0.000287118	75.018	RKS(1)ELPQDPHTK	4	0.15225	1	1.26891	1.0183	1.11621	0.848114	0.809783	0.826271
hsa05120 Epithelial cell signaling in Helicobacter pylori infection	0.976687	1	0.3	Q9Y2X7	592	0.833	Down	0.00027963	S	ARF GTPase-activating protein GIT1 OS=Homo sapiens OX=9606 GN=GIT1 PE=1 SV=2	GIT1	0.998019	1.6393e-16	163.32	HGS(0.998)GADS(0.002)DYENTQSGDPLLGLEGK	4	1.5046	3	1.07453	1.07542	1.057	0.88392	0.915202	0.872763
hsa05120 Epithelial cell signaling in Helicobacter pylori infection	0.976687	1	0.3	Q9Y2X7	596	0.826	Down	0.0023787	S	ARF GTPase-activating protein GIT1 OS=Homo sapiens OX=9606 GN=GIT1 PE=1 SV=2	GIT1	0.926973	3.92646e-05	81.18	HGS(0.995)GADS(0.927)DY(0.077)ENTQSGDPLLGLEGK	3	-0.11865	2	1.04348	1.11173	1.05894	0.921028	0.8697	0.863817
hsa05120 Epithelial cell signaling in Helicobacter pylori infection	0.976687	1	0.3	Q9Y2X7	410	0.814	Down	0.040823	S	ARF GTPase-activating protein GIT1 OS=Homo sapiens OX=9606 GN=GIT1 PE=1 SV=2	GIT1	0.853524	5.81985e-23	186.92	S(0.854)MDS(0.143)S(0.003)DLSDGAVTLQEYLELK	3	1.0047	1	1.16563	0.947858	1.14106	0.90961	0.881075	0.858847
hsa00480 Glutathione metabolism	0.62602	1	1.12	P11413	401	0.81	Down	0.035635	Y	Glucose-6-phosphate 1-dehydrogenase OS=Homo sapiens OX=9606 GN=G6PD PE=1 SV=4	G6PD	0.960981	0.000137924	88.338	VQPNEAVY(0.961)T(0.039)K	3	0.4039	2	1.03519	1.10486	1.14215	0.959096	0.918468	0.782218
hsa05211 Renal cell carcinoma	0.245622	6	1.4	O96013	207	0.804	Down	0.0049751	T	Serine/threonine-protein kinase PAK 4 OS=Homo sapiens OX=9606 GN=PAK4 PE=1 SV=1	PAK4	0.999979	0.000301264	80.632	LAAGRPFNT(1)YPR	3	-0.35196	1	1.12009	1.1469	1.06219	0.853591	0.874877	0.948156
hsa05211 Renal cell carcinoma	0.245622	6	1.4	P14921	38	0.64	Down	0.00053992	T	Protein C-ets-1 OS=Homo sapiens OX=9606 GN=ETS1 PE=1 SV=1	ETS1	0.921818	3.68925e-05	81.001	VDLELFPSPDMECADVPLLT(0.922)PS(0.058)S(0.02)K	4	0.41793	5	1.16004	1.18876	1.30346	0.819388	0.767283	0.751161
hsa05211 Renal cell carcinoma	0.245622	6	1.4	P14921	251	0.703	Down	0.00135919	S	Protein C-ets-1 OS=Homo sapiens OX=9606 GN=ETS1 PE=1 SV=1	ETS1	0.99868	1.23783e-31	213.82	LGGQDS(0.999)FES(0.001)IESYDSCDR	3	-0.12404	2	1.13618	1.16165	1.22246	0.882653	0.819864	0.771588
hsa05211 Renal cell carcinoma	0.245622	6	1.4	P14921	273	0.652	Down	0.00026049	S	Protein C-ets-1 OS=Homo sapiens OX=9606 GN=ETS1 PE=1 SV=1	ETS1	0.972074	1.54752e-31	206.11	LTQSWSSQS(0.028)S(0.972)FNSLQR	2	0.53395	2	1.167	1.21185	1.24514	0.833673	0.775073	0.754875
hsa05211 Renal cell carcinoma	0.245622	6	1.4	P36507	306	0.695	Down	0.0148639	S	Dual specificity mitogen-activated protein kinase kinase 2 OS=Homo sapiens OX=9606 GN=MAP2K2 PE=1 SV=1	MAP2K2	0.999855	0.0114831	47.75	PRPPGRPVS(1)GHGMDSR	4	-1.4169	2	1.32853	1.15015	1.03137	0.736426	0.838773	0.863281
hsa05211 Renal cell carcinoma	0.245622	6	1.4	Q9GZT9	125	0.804	Down	0.026804	S	Egl nine homolog 1 OS=Homo sapiens OX=9606 GN=EGLN1 PE=1 SV=1	EGLN1	1	0.000135061	86.539	AKPPADPAAAAS(1)PCR	3	-2.3497	1	1.19913	1.15155	1.01562	0.921933	0.950192	0.83475
hsa05211 Renal cell carcinoma	0.245622	6	1.4	Q13177	64	0.447	Down	0.00043612	S	Serine/threonine-protein kinase PAK 2 OS=Homo sapiens OX=9606 GN=PAK2 PE=1 SV=3	PAK2	0.999442	5.257e-12	149.52	IISIFSGT(0.001)EKGS(0.999)K	3	1.0594	1	1.39749	1.33236	1.3204	0.518782	0.631407	0.659136
hsa05211 Renal cell carcinoma	0.245622	6	1.4	Q13177	141	0.759	Down	0.026596	S	Serine/threonine-protein kinase PAK 2 OS=Homo sapiens OX=9606 GN=PAK2 PE=1 SV=3	PAK2	0.989003	9.27077e-23	176.53	YLS(0.989)FT(0.011)PPEKDGFPSGTPALNAK	3	0.010631	8	1.11509	1.14133	1.13433	0.787817	0.922574	0.862475
hsa05211 Renal cell carcinoma	0.245622	6	1.4	Q13177	143	0.729	Down	0.00164278	T	Serine/threonine-protein kinase PAK 2 OS=Homo sapiens OX=9606 GN=PAK2 PE=1 SV=3	PAK2	0.998069	1.27539e-07	147.63	YLS(0.002)FT(0.998)PPEK	3	-0.45105	7	1.12476	1.154	1.16517	0.779695	0.897492	0.834971
hsa05211 Renal cell carcinoma	0.245622	6	1.4	P11166	490	0.804	Down	0.033061	S	Solute carrier family 2, facilitated glucose transporter member 1 OS=Homo sapiens OX=9606 GN=SLC2A1 PE=1 SV=2	SLC2A1	0.999997	0.0016421	65.231	TPEELFHPLGADS(1)QV	3	-0.85549	1	1.22854	1.18885	0.994845	0.890386	0.930823	0.922925
hsa05211 Renal cell carcinoma	0.245622	6	1.4	P11166	473	0.718	Down	0.035703	S	Solute carrier family 2, facilitated glucose transporter member 1 OS=Homo sapiens OX=9606 GN=SLC2A1 PE=1 SV=2	SLC2A1	0.923363	6.12552e-17	171.94	QGGAS(0.923)QS(0.069)DKT(0.007)PEELFHPLGADSQV	4	-0.80699	2	1.23821	1.36291	0.989691	0.906559	0.787215	0.883399
hsa04962 Vasopressin-regulated water reabsorption	0.0200906	5	2.8	Q14204	4368	0.815	Down	0.00093754	S	Cytoplasmic dynein 1 heavy chain 1 OS=Homo sapiens OX=9606 GN=DYNC1H1 PE=1 SV=5	DYNC1H1	0.932944	1.04582e-07	115.56	T(0.02)DS(0.933)T(0.036)S(0.011)DGRPAWMR	3	-0.28378	5	1.09465	1.0751	1.14286	0.920802	0.875365	0.902941
hsa04962 Vasopressin-regulated water reabsorption	0.0200906	5	2.8	P20339	193	0.623	Down	0.0026193	S	Ras-related protein Rab-5A OS=Homo sapiens OX=9606 GN=RAB5A PE=1 SV=2	RAB5A	1	1.48385e-07	122.14	NEPQNPGANS(1)AR	3	0.50468	3	1.29517	1.18857	1.18438	0.862069	0.728008	0.696203
hsa04962 Vasopressin-regulated water reabsorption	0.0200906	5	2.8	Q9Y6G9	398	0.754	Down	0.0062155	S	Cytoplasmic dynein 1 light intermediate chain 1 OS=Homo sapiens OX=9606 GN=DYNC1LI1 PE=1 SV=3	DYNC1LI1	1	0.00567252	66.568	PVDAS(1)PR	2	-0.90128	1	1.09841	1.25773	1.06607	0.838681	0.859535	0.883382
hsa04962 Vasopressin-regulated water reabsorption	0.0200906	5	2.8	Q9Y6G9	405	0.757	Down	0.033275	S	Cytoplasmic dynein 1 light intermediate chain 1 OS=Homo sapiens OX=9606 GN=DYNC1LI1 PE=1 SV=3	DYNC1LI1	1	0.045578	40.021	VPGGS(1)PR	2	1.3684	1	1.04021	1.16151	1.2071	0.856506	0.748837	0.975705
hsa04962 Vasopressin-regulated water reabsorption	0.0200906	5	2.8	P17612	198	0.632	Down	0.000102671	T	cAMP-dependent protein kinase catalytic subunit alpha OS=Homo sapiens OX=9606 GN=PRKACA PE=1 SV=2	PRKACA	0.985721	1.71589e-53	251.29	T(0.009)WT(0.986)LCGT(0.005)PEYLAPEIILSK	2	0.23372	4	1.2387	1.16367	1.20218	0.758099	0.729104	0.791845
hsa04962 Vasopressin-regulated water reabsorption	0.0200906	5	2.8	P52566	31	0.688	Down	0.00054137	S	Rho GDP-dissociation inhibitor 2 OS=Homo sapiens OX=9606 GN=ARHGDIB PE=1 SV=3	ARHGDIB	1	5.86794e-11	147.26	S(1)LKELQEMDKDDESLIK	3	0.24278	2	1.18594	1.14672	1.15181	0.74359	0.834402	0.818737
hsa04340 Hedgehog signaling pathway	0.431711	2	1.4	P17612	198	0.632	Down	0.000102671	T	cAMP-dependent protein kinase catalytic subunit alpha OS=Homo sapiens OX=9606 GN=PRKACA PE=1 SV=2	PRKACA	0.985721	1.71589e-53	251.29	T(0.009)WT(0.986)LCGT(0.005)PEYLAPEIILSK	2	0.23372	4	1.2387	1.16367	1.20218	0.758099	0.729104	0.791845
hsa04340 Hedgehog signaling pathway	0.431711	2	1.4	P49841	25	0.731	Down	0.027898	S	Glycogen synthase kinase-3 beta OS=Homo sapiens OX=9606 GN=GSK3B PE=1 SV=2	GSK3B	0.874741	0.00134329	63.297	TTSFAESCKPVQQPS(0.125)AFGS(0.875)MK	4	-0.41305	1	1.28728	1.04314	1.14033	0.786368	0.968894	0.782038
hsa00020 Citrate cycle (TCA cycle)	0.445482	1	1.87	P31040	177	0.816	Down	0.022898	S	Succinate dehydrogenase [ubiquinone] flavoprotein subunit, mitochondrial OS=Homo sapiens OX=9606 GN=SDHA PE=1 SV=2	SDHA	1	0.0028298	71.03	AFGGQS(1)LK	2	0.11338	1	1.11902	1.08509	1.09476	0.923541	0.966834	0.800604
hsa01523 Antifolate resistance	0.747939	1	0.8	P22102	348	0.726	Down	0.0051021	Y	Trifunctional purine biosynthetic protein adenosine-3 OS=Homo sapiens OX=9606 GN=GART PE=1 SV=1	GART	0.918278	0.00778833	60.828	GY(0.005)PGDY(0.918)T(0.077)K	2	0.147	2	1.26695	1.13525	1.09187	0.797087	0.902978	0.835539
hsa05110 Vibrio cholerae infection	0.468108	3	1.2	P17252	497	0.556	Down	0.0033406	T	Protein kinase C alpha type OS=Homo sapiens OX=9606 GN=PRKCA PE=1 SV=4	PRKCA	0.995374	1.9459e-81	290.44	T(0.995)FCGT(0.005)PDYIAPEIIAYQPYGK	4	-0.46556	5	1.39259	1.15755	1.19528	0.594895	0.754116	0.734164
hsa05110 Vibrio cholerae infection	0.468108	3	1.2	P60468	30	0.327	Down	0.00054382	T	Protein transport protein Sec61 subunit beta OS=Homo sapiens OX=9606 GN=SEC61B PE=1 SV=2	SEC61B	1	1.12225e-05	95.815	AAGS(1)T(1)VRQR	2	0.0010213	3	1.32129	1.56073	1.65552	0.549419	0.522211	0.412214
hsa05110 Vibrio cholerae infection	0.468108	3	1.2	P60468	29	0.327	Down	0.00054382	S	Protein transport protein Sec61 subunit beta OS=Homo sapiens OX=9606 GN=SEC61B PE=1 SV=2	SEC61B	1	3.43853e-05	95.815	AAGS(1)T(1)VRQR	2	0.0010213	2	1.32129	1.56073	1.65552	0.549419	0.522211	0.412214
hsa05110 Vibrio cholerae infection	0.468108	3	1.2	P60468	17	0.759	Down	0.020101	S	Protein transport protein Sec61 subunit beta OS=Homo sapiens OX=9606 GN=SEC61B PE=1 SV=2	SEC61B	0.976957	1.64499e-16	172.34	S(0.977)PS(0.023)KAVAAR	2	-0.4398	4	1.18876	1.10121	1.14047	0.75	0.911155	0.943702
hsa05110 Vibrio cholerae infection	0.468108	3	1.2	P17612	198	0.632	Down	0.000102671	T	cAMP-dependent protein kinase catalytic subunit alpha OS=Homo sapiens OX=9606 GN=PRKACA PE=1 SV=2	PRKACA	0.985721	1.71589e-53	251.29	T(0.009)WT(0.986)LCGT(0.005)PEYLAPEIILSK	2	0.23372	4	1.2387	1.16367	1.20218	0.758099	0.729104	0.791845
hsa04371 Apelin signaling pathway	0.485346	6	1.09	Q14643	1598	0.703	Down	0.036478	S	Inositol 1,4,5-trisphosphate receptor type 1 OS=Homo sapiens OX=9606 GN=ITPR1 PE=1 SV=3	ITPR1	1	0.000592839	104.7	RDS(1)VLAASR	2	-0.66094	2	1.01439	1.22483	1.2934	0.927152	0.863774	0.692376
hsa04371 Apelin signaling pathway	0.485346	6	1.09	P62753	240	0.42	Down	2.2224e-07	S	40S ribosomal protein S6 OS=Homo sapiens OX=9606 GN=RPS6 PE=1 SV=1	RPS6	0.976428	0.0136586	45.614	LS(0.5)S(0.501)LRAS(0.976)T(0.017)S(0.006)K	3	-0.019157	2	1.38212	1.44293	1.41209	0.586408	0.600971	0.593269
hsa04371 Apelin signaling pathway	0.485346	6	1.09	P42345	2448	0.83	Down	0.0090564	S	Serine/threonine-protein kinase mTOR OS=Homo sapiens OX=9606 GN=MTOR PE=1 SV=1	MTOR	0.805907	4.74526e-23	180.79	T(0.173)DS(0.806)YS(0.021)AGQSVEILDGVELGEPAHK	3	0.87519	2	1.11547	1.11778	1.04615	0.858614	0.962049	0.900875
hsa04371 Apelin signaling pathway	0.485346	6	1.09	P36507	306	0.695	Down	0.0148639	S	Dual specificity mitogen-activated protein kinase kinase 2 OS=Homo sapiens OX=9606 GN=MAP2K2 PE=1 SV=1	MAP2K2	0.999855	0.0114831	47.75	PRPPGRPVS(1)GHGMDSR	4	-1.4169	2	1.32853	1.15015	1.03137	0.736426	0.838773	0.863281
hsa04371 Apelin signaling pathway	0.485346	6	1.09	Q9UBS0	423	0.742	Down	0.0148977	S	Ribosomal protein S6 kinase beta-2 OS=Homo sapiens OX=9606 GN=RPS6KB2 PE=1 SV=2	RPS6KB2	1	0.00567252	66.568	APVS(1)PLK	2	0.30862	2	1.20786	1.12967	1.08995	0.771483	0.962801	0.810516
hsa04371 Apelin signaling pathway	0.485346	6	1.09	P17612	198	0.632	Down	0.000102671	T	cAMP-dependent protein kinase catalytic subunit alpha OS=Homo sapiens OX=9606 GN=PRKACA PE=1 SV=2	PRKACA	0.985721	1.71589e-53	251.29	T(0.009)WT(0.986)LCGT(0.005)PEYLAPEIILSK	2	0.23372	4	1.2387	1.16367	1.20218	0.758099	0.729104	0.791845
hsa03460 Fanconi anemia pathway	0.924878	2	0.51	Q9BX63	197	0.749	Down	0.041402	S	Fanconi anemia group J protein OS=Homo sapiens OX=9606 GN=BRIP1 PE=1 SV=2	BRIP1	1	0.00490546	71.066	LNS(1)PLEK	2	-0.1429	1	1.31824	1.2081	0.998979	0.850794	0.969022	0.822181
hsa03460 Fanconi anemia pathway	0.924878	2	0.51	Q9BX63	226	0.826	Down	0.0149232	S	Fanconi anemia group J protein OS=Homo sapiens OX=9606 GN=BRIP1 PE=1 SV=2	BRIP1	0.99995	1.65261e-10	149.59	QGNS(1)QESSNTIK	3	0.40733	1	1.18109	1.06074	1.1093	0.85873	0.954501	0.953254
hsa03460 Fanconi anemia pathway	0.924878	2	0.51	P38398	1217	0.783	Down	0.024462	S	Breast cancer type 1 susceptibility protein OS=Homo sapiens OX=9606 GN=BRCA1 PE=1 SV=2	BRCA1	0.999402	7.82734e-13	151.23	KLES(0.744)S(0.258)EENLS(0.999)S(0.999)EDEELPCFQHLLFGK	4	-0.10735	4	0.990431	1.24281	1.12821	0.869652	0.909001	0.853705
hsa03460 Fanconi anemia pathway	0.924878	2	0.51	P38398	1218	0.783	Down	0.024462	S	Breast cancer type 1 susceptibility protein OS=Homo sapiens OX=9606 GN=BRCA1 PE=1 SV=2	BRCA1	0.999638	7.82734e-13	151.23	KLESS(0.001)EENLS(0.999)S(1)EDEELPCFQHLLFGK	3	0.68017	4	0.990431	1.24281	1.12821	0.869652	0.909001	0.853705
hsa04310 Wnt signaling pathway	0.642523	5	0.93	P17252	497	0.556	Down	0.0033406	T	Protein kinase C alpha type OS=Homo sapiens OX=9606 GN=PRKCA PE=1 SV=4	PRKCA	0.995374	1.9459e-81	290.44	T(0.995)FCGT(0.005)PDYIAPEIIAYQPYGK	4	-0.46556	5	1.39259	1.15755	1.19528	0.594895	0.754116	0.734164
hsa04310 Wnt signaling pathway	0.642523	5	0.93	Q13555	381	0.796	Down	0.0101985	S	Calcium/calmodulin-dependent protein kinase type II subunit gamma OS=Homo sapiens OX=9606 GN=CAMK2G PE=1 SV=4	CAMK2G	0.973501	6.26352e-13	153.36	GS(0.974)T(0.026)ESCNTTTEDEDLK	3	0.16272	1	1.07271	1.04295	1.16169	0.933747	0.821096	0.855057
hsa04310 Wnt signaling pathway	0.642523	5	0.93	P17612	198	0.632	Down	0.000102671	T	cAMP-dependent protein kinase catalytic subunit alpha OS=Homo sapiens OX=9606 GN=PRKACA PE=1 SV=2	PRKACA	0.985721	1.71589e-53	251.29	T(0.009)WT(0.986)LCGT(0.005)PEYLAPEIILSK	2	0.23372	4	1.2387	1.16367	1.20218	0.758099	0.729104	0.791845
hsa04310 Wnt signaling pathway	0.642523	5	0.93	P05771	500	0.478	Down	0.00093695	T	Protein kinase C beta type OS=Homo sapiens OX=9606 GN=PRKCB PE=1 SV=4	PRKCB	0.995374	1.9459e-81	290.44	T(0.995)FCGT(0.005)PDYIAPEIIAYQPYGK	4	-0.46556	6	1.5464	1.18244	1.30737	0.608791	0.644283	0.674528
hsa04310 Wnt signaling pathway	0.642523	5	0.93	P05771	504	0.692	Down	0.00020151	T	Protein kinase C beta type OS=Homo sapiens OX=9606 GN=PRKCB PE=1 SV=4	PRKCB	0.80982	4.41108e-11	148.75	T(0.19)FCGT(0.81)PDYIAPEIIAYQPYGK	3	0.69537	2	1.18248	1.20488	1.13603	0.825275	0.834846	0.776415
hsa04310 Wnt signaling pathway	0.642523	5	0.93	P49841	25	0.731	Down	0.027898	S	Glycogen synthase kinase-3 beta OS=Homo sapiens OX=9606 GN=GSK3B PE=1 SV=2	GSK3B	0.874741	0.00134329	63.297	TTSFAESCKPVQQPS(0.125)AFGS(0.875)MK	4	-0.41305	1	1.28728	1.04314	1.14033	0.786368	0.968894	0.782038
hsa05225 Hepatocellular carcinoma	0.201185	10	1.34	P17252	497	0.556	Down	0.0033406	T	Protein kinase C alpha type OS=Homo sapiens OX=9606 GN=PRKCA PE=1 SV=4	PRKCA	0.995374	1.9459e-81	290.44	T(0.995)FCGT(0.005)PDYIAPEIIAYQPYGK	4	-0.46556	5	1.39259	1.15755	1.19528	0.594895	0.754116	0.734164
hsa05225 Hepatocellular carcinoma	0.201185	10	1.34	P36507	306	0.695	Down	0.0148639	S	Dual specificity mitogen-activated protein kinase kinase 2 OS=Homo sapiens OX=9606 GN=MAP2K2 PE=1 SV=1	MAP2K2	0.999855	0.0114831	47.75	PRPPGRPVS(1)GHGMDSR	4	-1.4169	2	1.32853	1.15015	1.03137	0.736426	0.838773	0.863281
hsa05225 Hepatocellular carcinoma	0.201185	10	1.34	Q8TAQ2	754	0.737	Down	0.045621	S	SWI/SNF complex subunit SMARCC2 OS=Homo sapiens OX=9606 GN=SMARCC2 PE=1 SV=1	SMARCC2	0.998957	3.16444e-21	172.97	ADPAFGLESSGIAGTTS(0.001)DEPERIEES(0.999)GNDEAR	4	-0.82825	1	0.953227	1.13275	1.32863	0.808855	0.907001	0.799782
hsa05225 Hepatocellular carcinoma	0.201185	10	1.34	P06400	866	0.604	Down	0.00020446	S	Retinoblastoma-associated protein OS=Homo sapiens OX=9606 GN=RB1 PE=1 SV=2	RB1	0.999535	0.000334169	75.018	SAEGS(1)NPPKPLKK	3	0.67716	1	1.2809	1.23275	1.22143	0.750996	0.799603	0.704825
hsa05225 Hepatocellular carcinoma	0.201185	10	1.34	P06400	606	0.82	Down	0.0024033	Y	Retinoblastoma-associated protein OS=Homo sapiens OX=9606 GN=RB1 PE=1 SV=2	RB1	0.758945	9.41717e-06	73.227	EGPTDHLESACPLNLPLQNNHT(0.441)AADMY(0.759)LS(0.787)PVRS(0.012)PK	3	0.89538	3	1.12666	1.06797	1.10714	0.860558	0.935516	0.910123
hsa05225 Hepatocellular carcinoma	0.201185	10	1.34	P29353	139	0.543	Down	0.00030018	S	SHC-transforming protein 1 OS=Homo sapiens OX=9606 GN=SHC1 PE=1 SV=4	SHC1	0.999993	0.00167172	64.224	HGS(1)FVNKPTR	4	-0.306	1	1.32089	1.16622	1.29894	0.686165	0.644664	0.725825
hsa05225 Hepatocellular carcinoma	0.201185	10	1.34	P42345	2448	0.83	Down	0.0090564	S	Serine/threonine-protein kinase mTOR OS=Homo sapiens OX=9606 GN=MTOR PE=1 SV=1	MTOR	0.805907	4.74526e-23	180.79	T(0.173)DS(0.806)YS(0.021)AGQSVEILDGVELGEPAHK	3	0.87519	2	1.11547	1.11778	1.04615	0.858614	0.962049	0.900875
hsa05225 Hepatocellular carcinoma	0.201185	10	1.34	Q92922	350	0.484	Down	0.0072843	S	SWI/SNF complex subunit SMARCC1 OS=Homo sapiens OX=9606 GN=SMARCC1 PE=1 SV=3	SMARCC1	0.988746	0.00715607	60.161	KGQAS(0.989)LY(0.011)GK	3	0.82605	3	1.63905	1.14563	1.20076	0.689619	0.535168	0.704449
hsa05225 Hepatocellular carcinoma	0.201185	10	1.34	Q9UBS0	423	0.742	Down	0.0148977	S	Ribosomal protein S6 kinase beta-2 OS=Homo sapiens OX=9606 GN=RPS6KB2 PE=1 SV=2	RPS6KB2	1	0.00567252	66.568	APVS(1)PLK	2	0.30862	2	1.20786	1.12967	1.08995	0.771483	0.962801	0.810516
hsa05225 Hepatocellular carcinoma	0.201185	10	1.34	P05771	500	0.478	Down	0.00093695	T	Protein kinase C beta type OS=Homo sapiens OX=9606 GN=PRKCB PE=1 SV=4	PRKCB	0.995374	1.9459e-81	290.44	T(0.995)FCGT(0.005)PDYIAPEIIAYQPYGK	4	-0.46556	6	1.5464	1.18244	1.30737	0.608791	0.644283	0.674528
hsa05225 Hepatocellular carcinoma	0.201185	10	1.34	P05771	504	0.692	Down	0.00020151	T	Protein kinase C beta type OS=Homo sapiens OX=9606 GN=PRKCB PE=1 SV=4	PRKCB	0.80982	4.41108e-11	148.75	T(0.19)FCGT(0.81)PDYIAPEIIAYQPYGK	3	0.69537	2	1.18248	1.20488	1.13603	0.825275	0.834846	0.776415
hsa05225 Hepatocellular carcinoma	0.201185	10	1.34	P49841	25	0.731	Down	0.027898	S	Glycogen synthase kinase-3 beta OS=Homo sapiens OX=9606 GN=GSK3B PE=1 SV=2	GSK3B	0.874741	0.00134329	63.297	TTSFAESCKPVQQPS(0.125)AFGS(0.875)MK	4	-0.41305	1	1.28728	1.04314	1.14033	0.786368	0.968894	0.782038
hsa00561 Glycerolipid metabolism	0.747939	1	0.8	Q96AD5	391	0.682	Down	0.0084204	S	Patatin-like phospholipase domain-containing protein 2 OS=Homo sapiens OX=9606 GN=PNPLA2 PE=1 SV=1	PNPLA2	1	0.00152503	65.231	HLPS(1)RLPEQVELR	3	0.91991	1	1.2645	1.11352	1.17021	0.924569	0.744279	0.751201
hsa04660 T cell receptor signaling pathway	0.767486	6	0.82	O96013	207	0.804	Down	0.0049751	T	Serine/threonine-protein kinase PAK 4 OS=Homo sapiens OX=9606 GN=PAK4 PE=1 SV=1	PAK4	0.999979	0.000301264	80.632	LAAGRPFNT(1)YPR	3	-0.35196	1	1.12009	1.1469	1.06219	0.853591	0.874877	0.948156
hsa04660 T cell receptor signaling pathway	0.767486	6	0.82	P36507	306	0.695	Down	0.0148639	S	Dual specificity mitogen-activated protein kinase kinase 2 OS=Homo sapiens OX=9606 GN=MAP2K2 PE=1 SV=1	MAP2K2	0.999855	0.0114831	47.75	PRPPGRPVS(1)GHGMDSR	4	-1.4169	2	1.32853	1.15015	1.03137	0.736426	0.838773	0.863281
hsa04660 T cell receptor signaling pathway	0.767486	6	0.82	Q13177	64	0.447	Down	0.00043612	S	Serine/threonine-protein kinase PAK 2 OS=Homo sapiens OX=9606 GN=PAK2 PE=1 SV=3	PAK2	0.999442	5.257e-12	149.52	IISIFSGT(0.001)EKGS(0.999)K	3	1.0594	1	1.39749	1.33236	1.3204	0.518782	0.631407	0.659136
hsa04660 T cell receptor signaling pathway	0.767486	6	0.82	Q13177	141	0.759	Down	0.026596	S	Serine/threonine-protein kinase PAK 2 OS=Homo sapiens OX=9606 GN=PAK2 PE=1 SV=3	PAK2	0.989003	9.27077e-23	176.53	YLS(0.989)FT(0.011)PPEKDGFPSGTPALNAK	3	0.010631	8	1.11509	1.14133	1.13433	0.787817	0.922574	0.862475
hsa04660 T cell receptor signaling pathway	0.767486	6	0.82	Q13177	143	0.729	Down	0.00164278	T	Serine/threonine-protein kinase PAK 2 OS=Homo sapiens OX=9606 GN=PAK2 PE=1 SV=3	PAK2	0.998069	1.27539e-07	147.63	YLS(0.002)FT(0.998)PPEK	3	-0.45105	7	1.12476	1.154	1.16517	0.779695	0.897492	0.834971
hsa04660 T cell receptor signaling pathway	0.767486	6	0.82	P06239	192	0.769	Down	0.021855	Y	Tyrosine-protein kinase Lck OS=Homo sapiens OX=9606 GN=LCK PE=1 SV=6	LCK	0.999949	1.76854e-25	204.94	NLDNGGFY(1)ISPR	3	-0.12288	5	1.03582	1.18558	1.10636	0.844091	0.85497	0.858729
hsa04660 T cell receptor signaling pathway	0.767486	6	0.82	Q04759	538	0.682	Down	0.0054007	T	Protein kinase C theta type OS=Homo sapiens OX=9606 GN=PRKCQ PE=1 SV=3	PRKCQ	0.758097	1.56803e-16	173.32	T(0.236)NT(0.758)FCGT(0.006)PDYIAPEILLGQK	4	-0.56803	2	1.29281	1.13714	1.15307	0.729626	0.887195	0.826693
hsa04660 T cell receptor signaling pathway	0.767486	6	0.82	Q04759	542	0.664	Down	0.0046812	T	Protein kinase C theta type OS=Homo sapiens OX=9606 GN=PRKCQ PE=1 SV=3	PRKCQ	0.800787	1.43662e-16	174.28	T(0.022)NT(0.178)FCGT(0.801)PDYIAPEILLGQK	2	-1.3442	1	1.3129	1.17718	1.12487	0.753595	0.756098	0.891434
hsa04660 T cell receptor signaling pathway	0.767486	6	0.82	P49841	25	0.731	Down	0.027898	S	Glycogen synthase kinase-3 beta OS=Homo sapiens OX=9606 GN=GSK3B PE=1 SV=2	GSK3B	0.874741	0.00134329	63.297	TTSFAESCKPVQQPS(0.125)AFGS(0.875)MK	4	-0.41305	1	1.28728	1.04314	1.14033	0.786368	0.968894	0.782038
hsa05215 Prostate cancer	0.677325	4	0.9	P42345	2448	0.83	Down	0.0090564	S	Serine/threonine-protein kinase mTOR OS=Homo sapiens OX=9606 GN=MTOR PE=1 SV=1	MTOR	0.805907	4.74526e-23	180.79	T(0.173)DS(0.806)YS(0.021)AGQSVEILDGVELGEPAHK	3	0.87519	2	1.11547	1.11778	1.04615	0.858614	0.962049	0.900875
hsa05215 Prostate cancer	0.677325	4	0.9	P36507	306	0.695	Down	0.0148639	S	Dual specificity mitogen-activated protein kinase kinase 2 OS=Homo sapiens OX=9606 GN=MAP2K2 PE=1 SV=1	MAP2K2	0.999855	0.0114831	47.75	PRPPGRPVS(1)GHGMDSR	4	-1.4169	2	1.32853	1.15015	1.03137	0.736426	0.838773	0.863281
hsa05215 Prostate cancer	0.677325	4	0.9	P06400	866	0.604	Down	0.00020446	S	Retinoblastoma-associated protein OS=Homo sapiens OX=9606 GN=RB1 PE=1 SV=2	RB1	0.999535	0.000334169	75.018	SAEGS(1)NPPKPLKK	3	0.67716	1	1.2809	1.23275	1.22143	0.750996	0.799603	0.704825
hsa05215 Prostate cancer	0.677325	4	0.9	P06400	606	0.82	Down	0.0024033	Y	Retinoblastoma-associated protein OS=Homo sapiens OX=9606 GN=RB1 PE=1 SV=2	RB1	0.758945	9.41717e-06	73.227	EGPTDHLESACPLNLPLQNNHT(0.441)AADMY(0.759)LS(0.787)PVRS(0.012)PK	3	0.89538	3	1.12666	1.06797	1.10714	0.860558	0.935516	0.910123
hsa05215 Prostate cancer	0.677325	4	0.9	P49841	25	0.731	Down	0.027898	S	Glycogen synthase kinase-3 beta OS=Homo sapiens OX=9606 GN=GSK3B PE=1 SV=2	GSK3B	0.874741	0.00134329	63.297	TTSFAESCKPVQQPS(0.125)AFGS(0.875)MK	4	-0.41305	1	1.28728	1.04314	1.14033	0.786368	0.968894	0.782038
hsa05146 Amoebiasis	0.115683	4	2.04	P17252	497	0.556	Down	0.0033406	T	Protein kinase C alpha type OS=Homo sapiens OX=9606 GN=PRKCA PE=1 SV=4	PRKCA	0.995374	1.9459e-81	290.44	T(0.995)FCGT(0.005)PDYIAPEIIAYQPYGK	4	-0.46556	5	1.39259	1.15755	1.19528	0.594895	0.754116	0.734164
hsa05146 Amoebiasis	0.115683	4	2.04	P20339	193	0.623	Down	0.0026193	S	Ras-related protein Rab-5A OS=Homo sapiens OX=9606 GN=RAB5A PE=1 SV=2	RAB5A	1	1.48385e-07	122.14	NEPQNPGANS(1)AR	3	0.50468	3	1.29517	1.18857	1.18438	0.862069	0.728008	0.696203
hsa05146 Amoebiasis	0.115683	4	2.04	P17612	198	0.632	Down	0.000102671	T	cAMP-dependent protein kinase catalytic subunit alpha OS=Homo sapiens OX=9606 GN=PRKACA PE=1 SV=2	PRKACA	0.985721	1.71589e-53	251.29	T(0.009)WT(0.986)LCGT(0.005)PEYLAPEIILSK	2	0.23372	4	1.2387	1.16367	1.20218	0.758099	0.729104	0.791845
hsa05146 Amoebiasis	0.115683	4	2.04	P05771	500	0.478	Down	0.00093695	T	Protein kinase C beta type OS=Homo sapiens OX=9606 GN=PRKCB PE=1 SV=4	PRKCB	0.995374	1.9459e-81	290.44	T(0.995)FCGT(0.005)PDYIAPEIIAYQPYGK	4	-0.46556	6	1.5464	1.18244	1.30737	0.608791	0.644283	0.674528
hsa05146 Amoebiasis	0.115683	4	2.04	P05771	504	0.692	Down	0.00020151	T	Protein kinase C beta type OS=Homo sapiens OX=9606 GN=PRKCB PE=1 SV=4	PRKCB	0.80982	4.41108e-11	148.75	T(0.19)FCGT(0.81)PDYIAPEIIAYQPYGK	3	0.69537	2	1.18248	1.20488	1.13603	0.825275	0.834846	0.776415
hsa04724 Glutamatergic synapse	0.315256	4	1.4	Q14643	1598	0.703	Down	0.036478	S	Inositol 1,4,5-trisphosphate receptor type 1 OS=Homo sapiens OX=9606 GN=ITPR1 PE=1 SV=3	ITPR1	1	0.000592839	104.7	RDS(1)VLAASR	2	-0.66094	2	1.01439	1.22483	1.2934	0.927152	0.863774	0.692376
hsa04724 Glutamatergic synapse	0.315256	4	1.4	P17252	497	0.556	Down	0.0033406	T	Protein kinase C alpha type OS=Homo sapiens OX=9606 GN=PRKCA PE=1 SV=4	PRKCA	0.995374	1.9459e-81	290.44	T(0.995)FCGT(0.005)PDYIAPEIIAYQPYGK	4	-0.46556	5	1.39259	1.15755	1.19528	0.594895	0.754116	0.734164
hsa04724 Glutamatergic synapse	0.315256	4	1.4	P17612	198	0.632	Down	0.000102671	T	cAMP-dependent protein kinase catalytic subunit alpha OS=Homo sapiens OX=9606 GN=PRKACA PE=1 SV=2	PRKACA	0.985721	1.71589e-53	251.29	T(0.009)WT(0.986)LCGT(0.005)PEYLAPEIILSK	2	0.23372	4	1.2387	1.16367	1.20218	0.758099	0.729104	0.791845
hsa04724 Glutamatergic synapse	0.315256	4	1.4	P05771	500	0.478	Down	0.00093695	T	Protein kinase C beta type OS=Homo sapiens OX=9606 GN=PRKCB PE=1 SV=4	PRKCB	0.995374	1.9459e-81	290.44	T(0.995)FCGT(0.005)PDYIAPEIIAYQPYGK	4	-0.46556	6	1.5464	1.18244	1.30737	0.608791	0.644283	0.674528
hsa04724 Glutamatergic synapse	0.315256	4	1.4	P05771	504	0.692	Down	0.00020151	T	Protein kinase C beta type OS=Homo sapiens OX=9606 GN=PRKCB PE=1 SV=4	PRKCB	0.80982	4.41108e-11	148.75	T(0.19)FCGT(0.81)PDYIAPEIIAYQPYGK	3	0.69537	2	1.18248	1.20488	1.13603	0.825275	0.834846	0.776415
hsa05217 Basal cell carcinoma	0.692948	1	0.93	P49841	25	0.731	Down	0.027898	S	Glycogen synthase kinase-3 beta OS=Homo sapiens OX=9606 GN=GSK3B PE=1 SV=2	GSK3B	0.874741	0.00134329	63.297	TTSFAESCKPVQQPS(0.125)AFGS(0.875)MK	4	-0.41305	1	1.28728	1.04314	1.14033	0.786368	0.968894	0.782038
hsa05016 Huntington disease	0.610632	5	0.97	Q14643	1598	0.703	Down	0.036478	S	Inositol 1,4,5-trisphosphate receptor type 1 OS=Homo sapiens OX=9606 GN=ITPR1 PE=1 SV=3	ITPR1	1	0.000592839	104.7	RDS(1)VLAASR	2	-0.66094	2	1.01439	1.22483	1.2934	0.927152	0.863774	0.692376
hsa05016 Huntington disease	0.610632	5	0.97	P31040	177	0.816	Down	0.022898	S	Succinate dehydrogenase [ubiquinone] flavoprotein subunit, mitochondrial OS=Homo sapiens OX=9606 GN=SDHA PE=1 SV=2	SDHA	1	0.0028298	71.03	AFGGQS(1)LK	2	0.11338	1	1.11902	1.08509	1.09476	0.923541	0.966834	0.800604
hsa05016 Huntington disease	0.610632	5	0.97	Q96ST3	277	0.781	Down	0.0047232	S	Paired amphipathic helix protein Sin3a OS=Homo sapiens OX=9606 GN=SIN3A PE=1 SV=2	SIN3A	0.997372	9.49261e-14	119.99	S(0.997)PPVQPHT(0.003)PVTISLGTAPSLQNNQPVEFNHAINYVNK	4	-0.8178	4	1.12941	1.07744	1.09715	0.844028	0.806545	0.928866
hsa05016 Huntington disease	0.610632	5	0.97	P24928	1864	0.716	Down	0.0028244	S	DNA-directed RNA polymerase II subunit RPB1 OS=Homo sapiens OX=9606 GN=POLR2A PE=1 SV=2	POLR2A	0.980299	0.00182902	93.649	YSPT(0.02)S(0.98)PK	2	0.48647	3	1.08535	1.16373	1.23487	0.789581	0.81587	0.887984
hsa05016 Huntington disease	0.610632	5	0.97	P24928	1850	0.76	Down	0.029195	S	DNA-directed RNA polymerase II subunit RPB1 OS=Homo sapiens OX=9606 GN=POLR2A PE=1 SV=2	POLR2A	0.944393	1.26171e-05	99.11	YTPTSPSYS(0.007)PS(0.045)S(0.944)PEY(0.002)T(0.001)PTSPK	4	-0.8108	2	1.19011	1.05	1.1641	0.768131	0.832146	0.98778
hsa05016 Huntington disease	0.610632	5	0.97	P24928	1878	0.675	Down	0.00025761	S	DNA-directed RNA polymerase II subunit RPB1 OS=Homo sapiens OX=9606 GN=POLR2A PE=1 SV=2	POLR2A	0.97425	4.54715e-16	164.93	YSPT(0.022)S(0.974)PT(0.003)YSPTTPK	2	-0.28581	1	1.24345	1.18039	1.14051	0.830439	0.775178	0.801426
hsa05016 Huntington disease	0.610632	5	0.97	P24928	1920	0.71	Down	0.00130364	S	DNA-directed RNA polymerase II subunit RPB1 OS=Homo sapiens OX=9606 GN=POLR2A PE=1 SV=2	POLR2A	0.911701	1.14232e-11	150.61	YSPT(0.005)S(0.989)PT(0.011)YS(0.03)PT(0.053)S(0.912)PK	2	-0.32036	1	1.11542	1.14804	1.23282	0.80286	0.80061	0.878819
hsa05016 Huntington disease	0.610632	5	0.97	P24928	1913	0.71	Down	0.00130364	S	DNA-directed RNA polymerase II subunit RPB1 OS=Homo sapiens OX=9606 GN=POLR2A PE=1 SV=2	POLR2A	0.988711	1.14232e-11	150.61	YSPT(0.005)S(0.989)PT(0.011)YS(0.03)PT(0.053)S(0.912)PK	2	-0.32036	1	1.11542	1.14804	1.23282	0.80286	0.80061	0.878819
hsa05016 Huntington disease	0.610632	5	0.97	Q9UKL0	460	0.794	Down	0.049457	S	REST corepressor 1 OS=Homo sapiens OX=9606 GN=RCOR1 PE=1 SV=2	RCOR1	0.999998	0.00412039	76.282	S(1)PDNSIK	2	0.1766	1	1.23389	1.15445	0.951745	0.849654	0.914646	0.888052
hsa04130 SNARE interactions in vesicular transport	0.659747	2	0.93	O95249	141	0.771	Down	0.0056364	S	Golgi SNAP receptor complex member 1 OS=Homo sapiens OX=9606 GN=GOSR1 PE=1 SV=1	GOSR1	1	0.0172945	43.761	ERENLMGS(1)VR	3	-0.30103	2	1.15276	1.16162	1.05018	0.883053	0.904656	0.804853
hsa04130 SNARE interactions in vesicular transport	0.659747	2	0.93	O75396	137	0.647	Down	7.6122e-05	S	Vesicle-trafficking protein SEC22b OS=Homo sapiens OX=9606 GN=SEC22B PE=1 SV=4	SEC22B	0.999931	1.10551e-37	238.3	RNLGS(1)INTELQDVQR	3	3.4229	3	1.15905	1.22157	1.22857	0.757396	0.772088	0.804928
hsa04130 SNARE interactions in vesicular transport	0.659747	2	0.93	O75396	177	0.569	Down	0.000137681	S	Vesicle-trafficking protein SEC22b OS=Homo sapiens OX=9606 GN=SEC22B PE=1 SV=4	SEC22B	0.998606	1.04154e-05	111.12	ANNLSS(0.001)LS(0.999)KK	3	0.18558	7	1.25746	1.23712	1.28367	0.7643	0.670683	0.716632
hsa00230 Purine metabolism	0.924878	2	0.51	Q9UKK9	48	0.535	Down	0.0029634	S	ADP-sugar pyrophosphatase OS=Homo sapiens OX=9606 GN=NUDT5 PE=1 SV=1	NUDT5	0.995203	0.016021	56.432	T(0.005)WES(0.995)VKR	3	-0.83212	1	1.30303	1.18182	1.29794	0.580713	0.648168	0.796559
hsa00230 Purine metabolism	0.924878	2	0.51	P22102	348	0.726	Down	0.0051021	Y	Trifunctional purine biosynthetic protein adenosine-3 OS=Homo sapiens OX=9606 GN=GART PE=1 SV=1	GART	0.918278	0.00778833	60.828	GY(0.005)PGDY(0.918)T(0.077)K	2	0.147	2	1.26695	1.13525	1.09187	0.797087	0.902978	0.835539
hsa00510 N-Glycan biosynthesis	0.445482	1	1.87	Q8TCJ2	29	0.6	Down	1.69515e-05	S	Dolichyl-diphosphooligosaccharide--protein glycosyltransferase subunit STT3B OS=Homo sapiens OX=9606 GN=STT3B PE=1 SV=1	STT3B	0.999998	1.9186e-16	172.77	SSLNSSPWSGLMALGNS(1)R	3	-2.0775	6	1.22551	1.29046	1.25343	0.756121	0.736	0.770335
hsa04390 Hippo signaling pathway	0.764063	4	0.8	Q14160	607	0.566	Down	0.0074395	T	Protein scribble homolog OS=Homo sapiens OX=9606 GN=SCRIB PE=1 SV=4	SCRIB	0.903409	0.0105638	52.579	KDT(0.903)PHY(0.097)K	4	-0.17225	1	1.4937	1.13382	1.32591	0.630952	0.809574	0.797809
hsa04390 Hippo signaling pathway	0.764063	4	0.8	P62136	325	0.751	Down	0.0053385	S	Serine/threonine-protein phosphatase PP1-alpha catalytic subunit OS=Homo sapiens OX=9606 GN=PPP1CA PE=1 SV=1	PPP1CA	0.992523	0.0125529	46.068	PIT(0.007)PPRNS(0.993)AK	3	-0.90431	1	1.18208	1.07692	1.17159	0.789474	0.873474	0.91309
hsa04390 Hippo signaling pathway	0.764063	4	0.8	Q9UGP4	233	0.772	Down	0.00104201	S	LIM domain-containing protein 1 OS=Homo sapiens OX=9606 GN=LIMD1 PE=1 SV=1	LIMD1	0.998156	0.000740385	97.163	QLS(0.998)LS(0.002)SSR	2	0.5973	1	1.143	1.1346	1.06475	0.87751	0.876638	0.824764
hsa04390 Hippo signaling pathway	0.764063	4	0.8	P49841	25	0.731	Down	0.027898	S	Glycogen synthase kinase-3 beta OS=Homo sapiens OX=9606 GN=GSK3B PE=1 SV=2	GSK3B	0.874741	0.00134329	63.297	TTSFAESCKPVQQPS(0.125)AFGS(0.875)MK	4	-0.41305	1	1.28728	1.04314	1.14033	0.786368	0.968894	0.782038
hsa04910 Insulin signaling pathway	0.118784	13	1.4	P36507	306	0.695	Down	0.0148639	S	Dual specificity mitogen-activated protein kinase kinase 2 OS=Homo sapiens OX=9606 GN=MAP2K2 PE=1 SV=1	MAP2K2	0.999855	0.0114831	47.75	PRPPGRPVS(1)GHGMDSR	4	-1.4169	2	1.32853	1.15015	1.03137	0.736426	0.838773	0.863281
hsa04910 Insulin signaling pathway	0.118784	13	1.4	P18031	378	0.398	Down	0.0061765	S	Tyrosine-protein phosphatase non-receptor type 1 OS=Homo sapiens OX=9606 GN=PTPN1 PE=1 SV=1	PTPN1	1	0.00205997	91.064	VVGGS(1)LR	2	0.36443	2	1.38744	1.43004	1.37924	0.610998	0.578422	0.48118
hsa04910 Insulin signaling pathway	0.118784	13	1.4	P29353	139	0.543	Down	0.00030018	S	SHC-transforming protein 1 OS=Homo sapiens OX=9606 GN=SHC1 PE=1 SV=4	SHC1	0.999993	0.00167172	64.224	HGS(1)FVNKPTR	4	-0.306	1	1.32089	1.16622	1.29894	0.686165	0.644664	0.725825
hsa04910 Insulin signaling pathway	0.118784	13	1.4	P49327	2204	0.759	Down	0.0170619	T	Fatty acid synthase OS=Homo sapiens OX=9606 GN=FASN PE=1 SV=3	FASN	1	0.000143917	85.469	ADEASELACPT(1)PK	3	0.85741	1	1.02137	1.2082	1.21959	0.932751	0.814103	0.870518
hsa04910 Insulin signaling pathway	0.118784	13	1.4	P62753	240	0.42	Down	2.2224e-07	S	40S ribosomal protein S6 OS=Homo sapiens OX=9606 GN=RPS6 PE=1 SV=1	RPS6	0.976428	0.0136586	45.614	LS(0.5)S(0.501)LRAS(0.976)T(0.017)S(0.006)K	3	-0.019157	2	1.38212	1.44293	1.41209	0.586408	0.600971	0.593269
hsa04910 Insulin signaling pathway	0.118784	13	1.4	P42345	2448	0.83	Down	0.0090564	S	Serine/threonine-protein kinase mTOR OS=Homo sapiens OX=9606 GN=MTOR PE=1 SV=1	MTOR	0.805907	4.74526e-23	180.79	T(0.173)DS(0.806)YS(0.021)AGQSVEILDGVELGEPAHK	3	0.87519	2	1.11547	1.11778	1.04615	0.858614	0.962049	0.900875
hsa04910 Insulin signaling pathway	0.118784	13	1.4	P62136	325	0.751	Down	0.0053385	S	Serine/threonine-protein phosphatase PP1-alpha catalytic subunit OS=Homo sapiens OX=9606 GN=PPP1CA PE=1 SV=1	PPP1CA	0.992523	0.0125529	46.068	PIT(0.007)PPRNS(0.993)AK	3	-0.90431	1	1.18208	1.07692	1.17159	0.789474	0.873474	0.91309
hsa04910 Insulin signaling pathway	0.118784	13	1.4	Q9UPT5	283	0.732	Down	0.0020769	S	Exocyst complex component 7 OS=Homo sapiens OX=9606 GN=EXOC7 PE=1 SV=3	EXOC7	0.99999	0.000183786	87.447	QYS(1)QHGLDGK	2	-0.37991	1	1.10532	1.15035	1.11931	0.767462	0.888577	0.814186
hsa04910 Insulin signaling pathway	0.118784	13	1.4	P13807	698	0.615	Down	0.0061626	S	Glycogen [starch] synthase, muscle OS=Homo sapiens OX=9606 GN=GYS1 PE=1 SV=2	GYS1	0.997919	2.72633e-05	89.311	RAS(0.998)CT(0.002)SSTSGSK	3	-0.73717	2	1.33129	1.31149	1.10338	0.791704	0.844317	0.667946
hsa04910 Insulin signaling pathway	0.118784	13	1.4	Q9UBS0	423	0.742	Down	0.0148977	S	Ribosomal protein S6 kinase beta-2 OS=Homo sapiens OX=9606 GN=RPS6KB2 PE=1 SV=2	RPS6KB2	1	0.00567252	66.568	APVS(1)PLK	2	0.30862	2	1.20786	1.12967	1.08995	0.771483	0.962801	0.810516
hsa04910 Insulin signaling pathway	0.118784	13	1.4	P17612	198	0.632	Down	0.000102671	T	cAMP-dependent protein kinase catalytic subunit alpha OS=Homo sapiens OX=9606 GN=PRKACA PE=1 SV=2	PRKACA	0.985721	1.71589e-53	251.29	T(0.009)WT(0.986)LCGT(0.005)PEYLAPEIILSK	2	0.23372	4	1.2387	1.16367	1.20218	0.758099	0.729104	0.791845
hsa04910 Insulin signaling pathway	0.118784	13	1.4	Q8N122	877	0.77	Down	0.0080602	S	Regulatory-associated protein of mTOR OS=Homo sapiens OX=9606 GN=RPTOR PE=1 SV=1	RPTOR	0.991807	1.1764e-12	133.79	GVHIHQAGGS(0.992)PPASST(0.006)S(0.001)SSSLTNDVAK	4	-0.38196	1	1.10798	1.13482	1.15495	0.784753	0.930091	0.902978
hsa04910 Insulin signaling pathway	0.118784	13	1.4	P49841	25	0.731	Down	0.027898	S	Glycogen synthase kinase-3 beta OS=Homo sapiens OX=9606 GN=GSK3B PE=1 SV=2	GSK3B	0.874741	0.00134329	63.297	TTSFAESCKPVQQPS(0.125)AFGS(0.875)MK	4	-0.41305	1	1.28728	1.04314	1.14033	0.786368	0.968894	0.782038
hsa00500 Starch and sucrose metabolism	0.291377	2	1.87	P35573	584	0.806	Down	0.023222	Y	Glycogen debranching enzyme OS=Homo sapiens OX=9606 GN=AGL PE=1 SV=3	AGL	0.9987	1.78532e-11	143.64	EAMSAY(0.999)NS(0.001)HEEGR	3	0.24646	2	1.1408	1.02977	1.13	0.849146	0.832061	0.979125
hsa00500 Starch and sucrose metabolism	0.291377	2	1.87	P13807	698	0.615	Down	0.0061626	S	Glycogen [starch] synthase, muscle OS=Homo sapiens OX=9606 GN=GYS1 PE=1 SV=2	GYS1	0.997919	2.72633e-05	89.311	RAS(0.998)CT(0.002)SSTSGSK	3	-0.73717	2	1.33129	1.31149	1.10338	0.791704	0.844317	0.667946
hsa04510 Focal adhesion	0.327211	9	1.2	O96013	207	0.804	Down	0.0049751	T	Serine/threonine-protein kinase PAK 4 OS=Homo sapiens OX=9606 GN=PAK4 PE=1 SV=1	PAK4	0.999979	0.000301264	80.632	LAAGRPFNT(1)YPR	3	-0.35196	1	1.12009	1.1469	1.06219	0.853591	0.874877	0.948156
hsa04510 Focal adhesion	0.327211	9	1.2	P17252	497	0.556	Down	0.0033406	T	Protein kinase C alpha type OS=Homo sapiens OX=9606 GN=PRKCA PE=1 SV=4	PRKCA	0.995374	1.9459e-81	290.44	T(0.995)FCGT(0.005)PDYIAPEIIAYQPYGK	4	-0.46556	5	1.39259	1.15755	1.19528	0.594895	0.754116	0.734164
hsa04510 Focal adhesion	0.327211	9	1.2	Q13177	64	0.447	Down	0.00043612	S	Serine/threonine-protein kinase PAK 2 OS=Homo sapiens OX=9606 GN=PAK2 PE=1 SV=3	PAK2	0.999442	5.257e-12	149.52	IISIFSGT(0.001)EKGS(0.999)K	3	1.0594	1	1.39749	1.33236	1.3204	0.518782	0.631407	0.659136
hsa04510 Focal adhesion	0.327211	9	1.2	Q13177	141	0.759	Down	0.026596	S	Serine/threonine-protein kinase PAK 2 OS=Homo sapiens OX=9606 GN=PAK2 PE=1 SV=3	PAK2	0.989003	9.27077e-23	176.53	YLS(0.989)FT(0.011)PPEKDGFPSGTPALNAK	3	0.010631	8	1.11509	1.14133	1.13433	0.787817	0.922574	0.862475
hsa04510 Focal adhesion	0.327211	9	1.2	Q13177	143	0.729	Down	0.00164278	T	Serine/threonine-protein kinase PAK 2 OS=Homo sapiens OX=9606 GN=PAK2 PE=1 SV=3	PAK2	0.998069	1.27539e-07	147.63	YLS(0.002)FT(0.998)PPEK	3	-0.45105	7	1.12476	1.154	1.16517	0.779695	0.897492	0.834971
hsa04510 Focal adhesion	0.327211	9	1.2	P29353	139	0.543	Down	0.00030018	S	SHC-transforming protein 1 OS=Homo sapiens OX=9606 GN=SHC1 PE=1 SV=4	SHC1	0.999993	0.00167172	64.224	HGS(1)FVNKPTR	4	-0.306	1	1.32089	1.16622	1.29894	0.686165	0.644664	0.725825
hsa04510 Focal adhesion	0.327211	9	1.2	P62136	325	0.751	Down	0.0053385	S	Serine/threonine-protein phosphatase PP1-alpha catalytic subunit OS=Homo sapiens OX=9606 GN=PPP1CA PE=1 SV=1	PPP1CA	0.992523	0.0125529	46.068	PIT(0.007)PPRNS(0.993)AK	3	-0.90431	1	1.18208	1.07692	1.17159	0.789474	0.873474	0.91309
hsa04510 Focal adhesion	0.327211	9	1.2	Q13464	1341	0.769	Down	0.00165903	S	Rho-associated protein kinase 1 OS=Homo sapiens OX=9606 GN=ROCK1 PE=1 SV=1	ROCK1	0.999984	0.0015088	73.273	STANQS(1)FRK	3	-0.19239	4	1.06273	1.13722	1.15035	0.840625	0.835176	0.901554
hsa04510 Focal adhesion	0.327211	9	1.2	Q9NRY4	589	0.755	Down	0.0100563	S	Rho GTPase-activating protein 35 OS=Homo sapiens OX=9606 GN=ARHGAP35 PE=1 SV=3	ARHGAP35	0.950843	0.000851583	73.802	NS(0.951)LS(0.049)DPNIDR	2	2.1282	1	1.111	1.1483	1.09325	0.75	0.918762	0.863546
hsa04510 Focal adhesion	0.327211	9	1.2	P05771	500	0.478	Down	0.00093695	T	Protein kinase C beta type OS=Homo sapiens OX=9606 GN=PRKCB PE=1 SV=4	PRKCB	0.995374	1.9459e-81	290.44	T(0.995)FCGT(0.005)PDYIAPEIIAYQPYGK	4	-0.46556	6	1.5464	1.18244	1.30737	0.608791	0.644283	0.674528
hsa04510 Focal adhesion	0.327211	9	1.2	P05771	504	0.692	Down	0.00020151	T	Protein kinase C beta type OS=Homo sapiens OX=9606 GN=PRKCB PE=1 SV=4	PRKCB	0.80982	4.41108e-11	148.75	T(0.19)FCGT(0.81)PDYIAPEIIAYQPYGK	3	0.69537	2	1.18248	1.20488	1.13603	0.825275	0.834846	0.776415
hsa04510 Focal adhesion	0.327211	9	1.2	P49841	25	0.731	Down	0.027898	S	Glycogen synthase kinase-3 beta OS=Homo sapiens OX=9606 GN=GSK3B PE=1 SV=2	GSK3B	0.874741	0.00134329	63.297	TTSFAESCKPVQQPS(0.125)AFGS(0.875)MK	4	-0.41305	1	1.28728	1.04314	1.14033	0.786368	0.968894	0.782038
hsa04913 Ovarian steroidogenesis	0.445482	1	1.87	P17612	198	0.632	Down	0.000102671	T	cAMP-dependent protein kinase catalytic subunit alpha OS=Homo sapiens OX=9606 GN=PRKACA PE=1 SV=2	PRKACA	0.985721	1.71589e-53	251.29	T(0.009)WT(0.986)LCGT(0.005)PEYLAPEIILSK	2	0.23372	4	1.2387	1.16367	1.20218	0.758099	0.729104	0.791845
hsa04713 Circadian entrainment	0.111894	5	1.87	Q14643	1598	0.703	Down	0.036478	S	Inositol 1,4,5-trisphosphate receptor type 1 OS=Homo sapiens OX=9606 GN=ITPR1 PE=1 SV=3	ITPR1	1	0.000592839	104.7	RDS(1)VLAASR	2	-0.66094	2	1.01439	1.22483	1.2934	0.927152	0.863774	0.692376
hsa04713 Circadian entrainment	0.111894	5	1.87	P17252	497	0.556	Down	0.0033406	T	Protein kinase C alpha type OS=Homo sapiens OX=9606 GN=PRKCA PE=1 SV=4	PRKCA	0.995374	1.9459e-81	290.44	T(0.995)FCGT(0.005)PDYIAPEIIAYQPYGK	4	-0.46556	5	1.39259	1.15755	1.19528	0.594895	0.754116	0.734164
hsa04713 Circadian entrainment	0.111894	5	1.87	Q13555	381	0.796	Down	0.0101985	S	Calcium/calmodulin-dependent protein kinase type II subunit gamma OS=Homo sapiens OX=9606 GN=CAMK2G PE=1 SV=4	CAMK2G	0.973501	6.26352e-13	153.36	GS(0.974)T(0.026)ESCNTTTEDEDLK	3	0.16272	1	1.07271	1.04295	1.16169	0.933747	0.821096	0.855057
hsa04713 Circadian entrainment	0.111894	5	1.87	P17612	198	0.632	Down	0.000102671	T	cAMP-dependent protein kinase catalytic subunit alpha OS=Homo sapiens OX=9606 GN=PRKACA PE=1 SV=2	PRKACA	0.985721	1.71589e-53	251.29	T(0.009)WT(0.986)LCGT(0.005)PEYLAPEIILSK	2	0.23372	4	1.2387	1.16367	1.20218	0.758099	0.729104	0.791845
hsa04713 Circadian entrainment	0.111894	5	1.87	P05771	500	0.478	Down	0.00093695	T	Protein kinase C beta type OS=Homo sapiens OX=9606 GN=PRKCB PE=1 SV=4	PRKCB	0.995374	1.9459e-81	290.44	T(0.995)FCGT(0.005)PDYIAPEIIAYQPYGK	4	-0.46556	6	1.5464	1.18244	1.30737	0.608791	0.644283	0.674528
hsa04713 Circadian entrainment	0.111894	5	1.87	P05771	504	0.692	Down	0.00020151	T	Protein kinase C beta type OS=Homo sapiens OX=9606 GN=PRKCB PE=1 SV=4	PRKCB	0.80982	4.41108e-11	148.75	T(0.19)FCGT(0.81)PDYIAPEIIAYQPYGK	3	0.69537	2	1.18248	1.20488	1.13603	0.825275	0.834846	0.776415
hsa04970 Salivary secretion	0.111894	5	1.87	Q14643	1598	0.703	Down	0.036478	S	Inositol 1,4,5-trisphosphate receptor type 1 OS=Homo sapiens OX=9606 GN=ITPR1 PE=1 SV=3	ITPR1	1	0.000592839	104.7	RDS(1)VLAASR	2	-0.66094	2	1.01439	1.22483	1.2934	0.927152	0.863774	0.692376
hsa04970 Salivary secretion	0.111894	5	1.87	P17252	497	0.556	Down	0.0033406	T	Protein kinase C alpha type OS=Homo sapiens OX=9606 GN=PRKCA PE=1 SV=4	PRKCA	0.995374	1.9459e-81	290.44	T(0.995)FCGT(0.005)PDYIAPEIIAYQPYGK	4	-0.46556	5	1.39259	1.15755	1.19528	0.594895	0.754116	0.734164
hsa04970 Salivary secretion	0.111894	5	1.87	P17612	198	0.632	Down	0.000102671	T	cAMP-dependent protein kinase catalytic subunit alpha OS=Homo sapiens OX=9606 GN=PRKACA PE=1 SV=2	PRKACA	0.985721	1.71589e-53	251.29	T(0.009)WT(0.986)LCGT(0.005)PEYLAPEIILSK	2	0.23372	4	1.2387	1.16367	1.20218	0.758099	0.729104	0.791845
hsa04970 Salivary secretion	0.111894	5	1.87	P23634	1162	0.631	Down	0.00176272	S	Plasma membrane calcium-transporting ATPase 4 OS=Homo sapiens OX=9606 GN=ATP2B4 PE=1 SV=2	ATP2B4	0.800467	4.35877e-16	168.84	S(0.8)IHS(0.2)FMTHPEFAIEEELPR	3	-1.679	1	1.26036	1.25982	1.1084	0.721946	0.733673	0.832833
hsa04970 Salivary secretion	0.111894	5	1.87	P05771	500	0.478	Down	0.00093695	T	Protein kinase C beta type OS=Homo sapiens OX=9606 GN=PRKCB PE=1 SV=4	PRKCB	0.995374	1.9459e-81	290.44	T(0.995)FCGT(0.005)PDYIAPEIIAYQPYGK	4	-0.46556	6	1.5464	1.18244	1.30737	0.608791	0.644283	0.674528
hsa04970 Salivary secretion	0.111894	5	1.87	P05771	504	0.692	Down	0.00020151	T	Protein kinase C beta type OS=Homo sapiens OX=9606 GN=PRKCB PE=1 SV=4	PRKCB	0.80982	4.41108e-11	148.75	T(0.19)FCGT(0.81)PDYIAPEIIAYQPYGK	3	0.69537	2	1.18248	1.20488	1.13603	0.825275	0.834846	0.776415
hsa04961 Endocrine and other factor-regulated calcium reabsorption	0.310658	3	1.53	P17252	497	0.556	Down	0.0033406	T	Protein kinase C alpha type OS=Homo sapiens OX=9606 GN=PRKCA PE=1 SV=4	PRKCA	0.995374	1.9459e-81	290.44	T(0.995)FCGT(0.005)PDYIAPEIIAYQPYGK	4	-0.46556	5	1.39259	1.15755	1.19528	0.594895	0.754116	0.734164
hsa04961 Endocrine and other factor-regulated calcium reabsorption	0.310658	3	1.53	P17612	198	0.632	Down	0.000102671	T	cAMP-dependent protein kinase catalytic subunit alpha OS=Homo sapiens OX=9606 GN=PRKACA PE=1 SV=2	PRKACA	0.985721	1.71589e-53	251.29	T(0.009)WT(0.986)LCGT(0.005)PEYLAPEIILSK	2	0.23372	4	1.2387	1.16367	1.20218	0.758099	0.729104	0.791845
hsa04961 Endocrine and other factor-regulated calcium reabsorption	0.310658	3	1.53	P05771	500	0.478	Down	0.00093695	T	Protein kinase C beta type OS=Homo sapiens OX=9606 GN=PRKCB PE=1 SV=4	PRKCB	0.995374	1.9459e-81	290.44	T(0.995)FCGT(0.005)PDYIAPEIIAYQPYGK	4	-0.46556	6	1.5464	1.18244	1.30737	0.608791	0.644283	0.674528
hsa04961 Endocrine and other factor-regulated calcium reabsorption	0.310658	3	1.53	P05771	504	0.692	Down	0.00020151	T	Protein kinase C beta type OS=Homo sapiens OX=9606 GN=PRKCB PE=1 SV=4	PRKCB	0.80982	4.41108e-11	148.75	T(0.19)FCGT(0.81)PDYIAPEIIAYQPYGK	3	0.69537	2	1.18248	1.20488	1.13603	0.825275	0.834846	0.776415
hsa04110 Cell cycle	0.982523	6	0.53	P06493	14	0.735	Down	0.000160332	T	Cyclin-dependent kinase 1 OS=Homo sapiens OX=9606 GN=CDK1 PE=1 SV=3	CDK1	1	5.11318e-07	123.95	IGEGT(1)Y(1)GVVYK	3	-0.064899	8	1.16701	1.16599	1.14039	0.878818	0.855556	0.817561
hsa04110 Cell cycle	0.982523	6	0.53	P25205	144	0.658	Down	0.030017	S	DNA replication licensing factor MCM3 OS=Homo sapiens OX=9606 GN=MCM3 PE=1 SV=3	MCM3	0.882151	0.00375494	61.233	S(0.882)VHY(0.118)CPATK	3	1.4944	1	1.22949	1.34385	1.0483	0.809243	0.789738	0.7842
hsa04110 Cell cycle	0.982523	6	0.53	P06400	866	0.604	Down	0.00020446	S	Retinoblastoma-associated protein OS=Homo sapiens OX=9606 GN=RB1 PE=1 SV=2	RB1	0.999535	0.000334169	75.018	SAEGS(1)NPPKPLKK	3	0.67716	1	1.2809	1.23275	1.22143	0.750996	0.799603	0.704825
hsa04110 Cell cycle	0.982523	6	0.53	P06400	606	0.82	Down	0.0024033	Y	Retinoblastoma-associated protein OS=Homo sapiens OX=9606 GN=RB1 PE=1 SV=2	RB1	0.758945	9.41717e-06	73.227	EGPTDHLESACPLNLPLQNNHT(0.441)AADMY(0.759)LS(0.787)PVRS(0.012)PK	3	0.89538	3	1.12666	1.06797	1.10714	0.860558	0.935516	0.910123
hsa04110 Cell cycle	0.982523	6	0.53	Q14674	1501	0.82	Down	0.049916	S	Separin OS=Homo sapiens OX=9606 GN=ESPL1 PE=1 SV=3	ESPL1	1	0.00261763	74.698	KMS(1)FEILR	3	-1.0667	2	1.09218	1.23086	0.990593	0.848598	0.935423	0.932485
hsa04110 Cell cycle	0.982523	6	0.53	O00311	27	0.68	Down	0.0034424	S	Cell division cycle 7-related protein kinase OS=Homo sapiens OX=9606 GN=CDC7 PE=1 SV=1	CDC7	1	0.0117906	54.343	FQAEGS(1)LKK	3	1.2116	1	1.17178	1.33033	1.09822	0.855589	0.808765	0.784615
hsa04110 Cell cycle	0.982523	6	0.53	P49841	25	0.731	Down	0.027898	S	Glycogen synthase kinase-3 beta OS=Homo sapiens OX=9606 GN=GSK3B PE=1 SV=2	GSK3B	0.874741	0.00134329	63.297	TTSFAESCKPVQQPS(0.125)AFGS(0.875)MK	4	-0.41305	1	1.28728	1.04314	1.14033	0.786368	0.968894	0.782038
hsa04720 Long-term potentiation	0.0613072	8	1.79	Q14643	1598	0.703	Down	0.036478	S	Inositol 1,4,5-trisphosphate receptor type 1 OS=Homo sapiens OX=9606 GN=ITPR1 PE=1 SV=3	ITPR1	1	0.000592839	104.7	RDS(1)VLAASR	2	-0.66094	2	1.01439	1.22483	1.2934	0.927152	0.863774	0.692376
hsa04720 Long-term potentiation	0.0613072	8	1.79	P17252	497	0.556	Down	0.0033406	T	Protein kinase C alpha type OS=Homo sapiens OX=9606 GN=PRKCA PE=1 SV=4	PRKCA	0.995374	1.9459e-81	290.44	T(0.995)FCGT(0.005)PDYIAPEIIAYQPYGK	4	-0.46556	5	1.39259	1.15755	1.19528	0.594895	0.754116	0.734164
hsa04720 Long-term potentiation	0.0613072	8	1.79	Q13555	381	0.796	Down	0.0101985	S	Calcium/calmodulin-dependent protein kinase type II subunit gamma OS=Homo sapiens OX=9606 GN=CAMK2G PE=1 SV=4	CAMK2G	0.973501	6.26352e-13	153.36	GS(0.974)T(0.026)ESCNTTTEDEDLK	3	0.16272	1	1.07271	1.04295	1.16169	0.933747	0.821096	0.855057
hsa04720 Long-term potentiation	0.0613072	8	1.79	P62136	325	0.751	Down	0.0053385	S	Serine/threonine-protein phosphatase PP1-alpha catalytic subunit OS=Homo sapiens OX=9606 GN=PPP1CA PE=1 SV=1	PPP1CA	0.992523	0.0125529	46.068	PIT(0.007)PPRNS(0.993)AK	3	-0.90431	1	1.18208	1.07692	1.17159	0.789474	0.873474	0.91309
hsa04720 Long-term potentiation	0.0613072	8	1.79	P36507	306	0.695	Down	0.0148639	S	Dual specificity mitogen-activated protein kinase kinase 2 OS=Homo sapiens OX=9606 GN=MAP2K2 PE=1 SV=1	MAP2K2	0.999855	0.0114831	47.75	PRPPGRPVS(1)GHGMDSR	4	-1.4169	2	1.32853	1.15015	1.03137	0.736426	0.838773	0.863281
[truncated: 877 more rows]
